# Supplementary material for: Crosstalk between RNA-Binding Proteins and Immune Microenvironment Revealed Two RBP Regulatory Patterns with Distinct Immunophenotypes in Periodontitis
Source: J Immunol Res. 2021 Jul 5;2021:5588429. doi: 10.1155/2021/5588429 (PMC8275429; doi:10.1155/2021/5588429)
Supplement: Supplementary Materials — Supplementary figures (FigureS1-S3) were uploaded entitled “supplementary figures.docx.” Supplementary tables (Table S1-S12) were uploaded entitled “Table S1: significantly dysregulated RBPs .txt.” “Table S2: results of univariate logistic regression.txt.” “Table S3: results of multivariate logistic regression.txt.” “Table S4: diversity of immunocytes between healthy and periodontitis samples.txt.” “Table S5: correlation analysis between immnuocytes and RBPs.txt.” “Table S6: diversity of immune pathways between healthy and periodontitis samples.txt.” “Table S7: Correlations between RBPs and immune pathways.txt.” “Table S8: diversity of HLA expression between healthy and periodontitis samples.txt.” “Table S9: correlation between RBPs and HLA expression.txt.” “Table S10: RBP regulatory subtypes.txt.” “Table S11: RBP regulatory subtype related genes.txt.” “Table S12: gene significance and module membership.txt,” respectively, with their filename indicating the contents of the tables. [file 5588429.f1.zip]

Archive with 14 entries (13 files):
- 5588429.f1/supplementary figures (1).docx
- 5588429.f1/Table S1. Significantly dysregulated RBPs .txt
- 5588429.f1/Table S10. RBP-regulatory subtypes..txt
- 5588429.f1/Table S11. RBP-regulatory subtype related genes..txt
- 5588429.f1/Table S12. Gene significance and module membership..txt
- 5588429.f1/Table S2. Results of univariate logistic regression. .txt
- 5588429.f1/Table S3. Results of multivariate logistic regression. .txt
- 5588429.f1/Table S4. Diversity of immunocytes between healthy and periodontitis samples..txt
- 5588429.f1/Table S5. Correlation analysis between immnuocytes and RBPs..txt
- 5588429.f1/Table S6. Diversity of immune pathways between healthy and periodontitis samples..txt
- 5588429.f1/Table S7. Correlations between RBPs and immune pathways..txt
- 5588429.f1/Table S8. Diversity of HLA expression between healthy and periodontitis samples..txt
- 5588429.f1/Table S9. Correlation between RBPs and HLA expression..txt
- 5588429.f1/
