# Supplementary material for: Crosstalk between RNA-Binding Proteins and Immune Microenvironment Revealed Two RBP Regulatory Patterns with Distinct Immunophenotypes in Periodontitis
Source: J Immunol Res. 2021 Jul 5;2021:5588429. doi: 10.1155/2021/5588429 (PMC8275429; doi:10.1155/2021/5588429)
Supplement: Supplementary Materials — Supplementary figures (FigureS1-S3) were uploaded entitled “supplementary figures.docx.” Supplementary tables (Table S1-S12) were uploaded entitled “Table S1: significantly dysregulated RBPs .txt.” “Table S2: results of univariate logistic regression.txt.” “Table S3: results of multivariate logistic regression.txt.” “Table S4: diversity of immunocytes between healthy and periodontitis samples.txt.” “Table S5: correlation analysis between immnuocytes and RBPs.txt.” “Table S6: diversity of immune pathways between healthy and periodontitis samples.txt.” “Table S7: Correlations between RBPs and immune pathways.txt.” “Table S8: diversity of HLA expression between healthy and periodontitis samples.txt.” “Table S9: correlation between RBPs and HLA expression.txt.” “Table S10: RBP regulatory subtypes.txt.” “Table S11: RBP regulatory subtype related genes.txt.” “Table S12: gene significance and module membership.txt,” respectively, with their filename indicating the contents of the tables. [file 5588429.f1.zip › 5588429.f1/Table S1. Significantly dysregulated RBPs .txt]

Table S1. Significantly dysregulated RBPs
ID	logFC	P.Value	adj.P.Val
RNASE6	1.1405167	7.34E-29	1.04E-25
ESRP1	-0.587896575	5.12E-24	3.62E-21
SAP18	-0.541934467	1.16E-23	5.47E-21
NIP7	-0.579004513	1.51E-19	2.14E-17
APOBEC3G	0.543107169	3.32E-19	4.27E-17
ARHGEF28	-0.577284717	5.28E-19	6.21E-17
IREB2	-0.500820143	1.21E-18	1.22E-16
SIDT1	0.702386691	1.38E-17	1.02E-15
ENDOU	-0.858884032	2.42E-17	1.60E-15
SPATS2	0.68641386	2.49E-17	1.60E-15
ISG20	0.915198701	7.00E-17	3.68E-15
ESF1	-0.597288484	2.70E-16	1.23E-14
PUS7	-0.533097312	1.22E-15	5.05E-14
WARS	0.591786085	2.20E-15	8.62E-14
GNL2	-0.537362212	1.51E-14	5.34E-13
AZGP1	-0.87958055	1.27E-13	3.81E-12
ZC3H12D	0.788439922	2.70E-13	7.95E-12
EIF4E	-0.548122376	3.59E-13	1.01E-11
ERN1	0.600793345	1.26E-12	3.06E-11
INTS7	-0.539290634	2.82E-12	6.14E-11
TPR	-0.517258452	1.46E-11	2.48E-10
RRBP1	0.508267001	2.22E-11	3.69E-10
DDX6	0.646832919	1.25E-07	8.35E-07
SF1	-0.534840964	0.000269708	0.000830279
