# Supplementary material for: Crosstalk between RNA-Binding Proteins and Immune Microenvironment Revealed Two RBP Regulatory Patterns with Distinct Immunophenotypes in Periodontitis
Source: J Immunol Res. 2021 Jul 5;2021:5588429. doi: 10.1155/2021/5588429 (PMC8275429; doi:10.1155/2021/5588429)
Supplement: Supplementary Materials — Supplementary figures (FigureS1-S3) were uploaded entitled “supplementary figures.docx.” Supplementary tables (Table S1-S12) were uploaded entitled “Table S1: significantly dysregulated RBPs .txt.” “Table S2: results of univariate logistic regression.txt.” “Table S3: results of multivariate logistic regression.txt.” “Table S4: diversity of immunocytes between healthy and periodontitis samples.txt.” “Table S5: correlation analysis between immnuocytes and RBPs.txt.” “Table S6: diversity of immune pathways between healthy and periodontitis samples.txt.” “Table S7: Correlations between RBPs and immune pathways.txt.” “Table S8: diversity of HLA expression between healthy and periodontitis samples.txt.” “Table S9: correlation between RBPs and HLA expression.txt.” “Table S10: RBP regulatory subtypes.txt.” “Table S11: RBP regulatory subtype related genes.txt.” “Table S12: gene significance and module membership.txt,” respectively, with their filename indicating the contents of the tables. [file 5588429.f1.zip › 5588429.f1/Table S2. Results of univariate logistic regression. .txt]

Table S2. Results of univariate logistic regression.
id	OR	low95	high95	pvalue
RNASE6	8.32763912	5.150142492	14.35264433	3.95E-16
ESRP1	0.001295057	0.000219464	0.00587289	1.59E-15
SAP18	0.01237193	0.003728439	0.03530042	1.46E-14
NIP7	0.05049711	0.022209066	0.105909566	5.47E-14
APOBEC3G	23.91802267	10.73924375	58.32293233	1.58E-13
ARHGEF28	0.05707773	0.024868166	0.119558474	7.18E-13
IREB2	0.024857577	0.00861937	0.063533349	3.39E-13
SIDT1	8.354983172	4.775481783	15.57015108	1.57E-12
ENDOU	0.098774694	0.050476271	0.178780039	6.00E-13
SPATS2	11.3120514	5.853020193	23.94097773	1.25E-11
ISG20	5.346642936	3.424200539	8.793991349	2.68E-12
ESF1	0.077994552	0.037294373	0.15237164	1.02E-12
PUS7	0.048912063	0.019375943	0.111124254	1.07E-11
WARS	18.22253516	8.336012503	44.02474961	6.85E-12
GNL2	0.026784298	0.009152423	0.069254292	2.02E-12
AZGP1	0.372034437	0.267195514	0.504093697	8.68E-10
ZC3H12D	3.796176232	2.568043643	5.805149897	1.25E-10
EIF4E	0.135465518	0.071115977	0.24382248	1.76E-10
ERN1	9.581845379	4.888393721	20.59546091	6.34E-10
INTS7	0.164498786	0.09026422	0.2851554	6.74E-10
TPR	0.20908032	0.12091479	0.345735416	4.47E-09
RRBP1	5.619036192	3.242037917	10.26328533	3.76E-09
DDX6	2.815203269	1.895194817	4.392179366	1.28E-06
SF1	0.639296714	0.496051349	0.818033456	0.000436664
