# Supplementary material for: Crosstalk between RNA-Binding Proteins and Immune Microenvironment Revealed Two RBP Regulatory Patterns with Distinct Immunophenotypes in Periodontitis
Source: J Immunol Res. 2021 Jul 5;2021:5588429. doi: 10.1155/2021/5588429 (PMC8275429; doi:10.1155/2021/5588429)
Supplement: Supplementary Materials — Supplementary figures (FigureS1-S3) were uploaded entitled “supplementary figures.docx.” Supplementary tables (Table S1-S12) were uploaded entitled “Table S1: significantly dysregulated RBPs .txt.” “Table S2: results of univariate logistic regression.txt.” “Table S3: results of multivariate logistic regression.txt.” “Table S4: diversity of immunocytes between healthy and periodontitis samples.txt.” “Table S5: correlation analysis between immnuocytes and RBPs.txt.” “Table S6: diversity of immune pathways between healthy and periodontitis samples.txt.” “Table S7: Correlations between RBPs and immune pathways.txt.” “Table S8: diversity of HLA expression between healthy and periodontitis samples.txt.” “Table S9: correlation between RBPs and HLA expression.txt.” “Table S10: RBP regulatory subtypes.txt.” “Table S11: RBP regulatory subtype related genes.txt.” “Table S12: gene significance and module membership.txt,” respectively, with their filename indicating the contents of the tables. [file 5588429.f1.zip › 5588429.f1/Table S3. Results of multivariate logistic regression. .txt]

Table S3. Results of multivariate logistic regression.
ID	OR	low95	high95	pvalue
RNASE6	1.598967467	0.575151968	4.463071788	0.365564339
ESRP1	0.201766437	0.019076774	2.045891309	0.175725299
SAP18	0.290611685	0.043289618	1.808799907	0.190864965
APOBEC3G	2.848033033	0.558563478	16.59758037	0.224518012
IREB2	0.381131912	0.098535502	1.394345316	0.149062189
ENDOU	0.733214719	0.263125695	1.856309588	0.525983723
SPATS2	1.953364425	0.536761883	7.299700136	0.309022118
PUS7	0.38612036	0.074218786	2.056104125	0.265872577
GNL2	0.166842991	0.028786972	0.724150338	0.033561507
AZGP1	0.851291737	0.508229487	1.400642555	0.528487484
DDX6	2.248962563	1.173091408	4.742723375	0.022070754
SF1	0.663382175	0.402183918	1.074107881	0.098818603
