# Supplementary material for: Crosstalk between RNA-Binding Proteins and Immune Microenvironment Revealed Two RBP Regulatory Patterns with Distinct Immunophenotypes in Periodontitis
Source: J Immunol Res. 2021 Jul 5;2021:5588429. doi: 10.1155/2021/5588429 (PMC8275429; doi:10.1155/2021/5588429)
Supplement: Supplementary Materials — Supplementary figures (FigureS1-S3) were uploaded entitled “supplementary figures.docx.” Supplementary tables (Table S1-S12) were uploaded entitled “Table S1: significantly dysregulated RBPs .txt.” “Table S2: results of univariate logistic regression.txt.” “Table S3: results of multivariate logistic regression.txt.” “Table S4: diversity of immunocytes between healthy and periodontitis samples.txt.” “Table S5: correlation analysis between immnuocytes and RBPs.txt.” “Table S6: diversity of immune pathways between healthy and periodontitis samples.txt.” “Table S7: Correlations between RBPs and immune pathways.txt.” “Table S8: diversity of HLA expression between healthy and periodontitis samples.txt.” “Table S9: correlation between RBPs and HLA expression.txt.” “Table S10: RBP regulatory subtypes.txt.” “Table S11: RBP regulatory subtype related genes.txt.” “Table S12: gene significance and module membership.txt,” respectively, with their filename indicating the contents of the tables. [file 5588429.f1.zip › 5588429.f1/Table S4. Diversity of immunocytes between healthy and periodontitis samples..txt]

Table S4. Diversity of immunocytes between healthy and periodontitis samples.
ID	control	treat	FC	pvalue
Activated_B_cell	0.028682337	0.303307441	10.57471168	1.96E-24
Activated_CD4_T_cell	0.203188255	0.325499403	1.601959733	1.91E-15
Activated_CD8_T_cell	0.325510633	0.422979084	1.299432462	9.02E-17
Activated_dendritic_cell	0.373875382	0.425813289	1.138917699	3.38E-18
CD56bright_natural_killer_cell	0.396470546	0.40462237	1.020560983	0.001557049
Eosinophil	-0.07644482	0.010637701	-0.139155292	2.70E-13
Gamma_delta_T_cell	0.450834647	0.479424376	1.063415112	4.93E-09
Immature_B_cell	-0.073652561	0.118068177	-1.603042393	6.97E-21
Immature_dendritic_cell	0.509927853	0.526558794	1.032614302	6.67E-09
Macrophage	0.075804796	0.143624938	1.89466821	6.11E-24
Mast_cell	0.166162005	0.18754276	1.128674155	0.006638189
MDSC	0.369494303	0.52998994	1.434365659	6.91E-25
Monocyte	0.426397056	0.452043959	1.060147935	1.85E-11
Natural_killer_cell	0.219708722	0.273328792	1.244050709	4.00E-19
Natural_killer_T_cell	0.132520668	0.19501585	1.471588195	5.22E-22
Neutrophil	0.160179802	0.185920142	1.160696541	0.001640532
Plasmacytoid_dendritic_cell	0.502117698	0.543308302	1.082033763	8.03E-17
Regulatory_T_cell	0.1973633	0.299154638	1.515756162	3.78E-19
T_follicular_helper_cell	0.307432516	0.348413561	1.133300945	7.73E-19
Type_1_T_helper_cell	0.146449915	0.219138288	1.496336059	1.73E-22
Type_17_T_helper_cell	-0.016246414	0.001577097	-0.097073533	1.27E-08
