# Supplementary material for: Crosstalk between RNA-Binding Proteins and Immune Microenvironment Revealed Two RBP Regulatory Patterns with Distinct Immunophenotypes in Periodontitis
Source: J Immunol Res. 2021 Jul 5;2021:5588429. doi: 10.1155/2021/5588429 (PMC8275429; doi:10.1155/2021/5588429)
Supplement: Supplementary Materials — Supplementary figures (FigureS1-S3) were uploaded entitled “supplementary figures.docx.” Supplementary tables (Table S1-S12) were uploaded entitled “Table S1: significantly dysregulated RBPs .txt.” “Table S2: results of univariate logistic regression.txt.” “Table S3: results of multivariate logistic regression.txt.” “Table S4: diversity of immunocytes between healthy and periodontitis samples.txt.” “Table S5: correlation analysis between immnuocytes and RBPs.txt.” “Table S6: diversity of immune pathways between healthy and periodontitis samples.txt.” “Table S7: Correlations between RBPs and immune pathways.txt.” “Table S8: diversity of HLA expression between healthy and periodontitis samples.txt.” “Table S9: correlation between RBPs and HLA expression.txt.” “Table S10: RBP regulatory subtypes.txt.” “Table S11: RBP regulatory subtype related genes.txt.” “Table S12: gene significance and module membership.txt,” respectively, with their filename indicating the contents of the tables. [file 5588429.f1.zip › 5588429.f1/Table S5. Correlation analysis between immnuocytes and RBPs..txt]

Table S5. Correlation analysis between immnuocytes and RBPs.
gene	immunocyte	cor	pvalue	fdr	abscor	logp
RNASE6	Activated_B_cell	0.871	6.78E-97	1.25E-94	0.871	-311.9432072
RNASE6	Activated_CD4_T_cell	0.563	2.37E-27	1.06E-26	0.563	-86.28255341
RNASE6	Activated_CD8_T_cell	0.635	1.81E-36	1.47E-35	0.635	-115.7127357
RNASE6	Activated_dendritic_cell	0.544	2.90E-25	1.19E-24	0.544	-79.47134526
RNASE6	CD56bright_natural_killer_cell	0.26	3.39E-06	5.12E-06	0.26	-17.57656339
RNASE6	CD56dim_natural_killer_cell	-0.213	0.000161343	0.000218287	0.213	-12.16148566
RNASE6	Eosinophil	0.614	1.68E-33	1.02E-32	0.614	-106.2781904
RNASE6	Gamma_delta_T_cell	0.63	9.96E-36	7.43E-35	0.63	-113.3741657
RNASE6	Immature_B_cell	0.822	2.18E-77	2.41E-75	0.822	-247.8760218
RNASE6	Immature_dendritic_cell	0.348	2.90E-10	5.32E-10	0.348	-30.80708034
RNASE6	Macrophage	0.599	1.45E-31	7.69E-31	0.599	-100.0376219
RNASE6	Mast_cell	0.218	0.000106647	0.000146987	0.218	-12.73202772
RNASE6	MDSC	0.874	1.04E-98	2.86E-96	0.874	-317.3879233
RNASE6	Monocyte	0.445	1.73E-16	4.27E-16	0.445	-51.05747126
RNASE6	Natural_killer_cell	0.566	1.31E-27	5.91E-27	0.566	-87.12833237
RNASE6	Natural_killer_T_cell	0.619	4.06E-34	2.58E-33	0.619	-108.2572723
RNASE6	Plasmacytoid_dendritic_cell	0.697	1.95E-46	2.69E-45	0.697	-148.0576329
RNASE6	Regulatory_T_cell	0.82	1.05E-76	8.30E-75	0.82	-246.0917636
RNASE6	T_follicular_helper_cell	0.553	3.47E-26	1.51E-25	0.553	-82.45577392
RNASE6	Type_1_T_helper_cell	0.77	5.44E-62	2.00E-60	0.77	-198.3144755
RNASE6	Type_17_T_helper_cell	0.161	0.00459493	0.00585396	0.161	-7.416371382
ESRP1	Activated_B_cell	-0.811	1.56E-73	8.60E-72	0.811	-236.0738837
ESRP1	Activated_CD4_T_cell	-0.372	1.33E-11	2.57E-11	0.372	-35.17712861
ESRP1	Activated_CD8_T_cell	-0.54	7.63E-25	2.99E-24	0.54	-78.14746623
ESRP1	Activated_dendritic_cell	-0.679	2.67E-43	3.08E-42	0.679	-137.90026
ESRP1	Eosinophil	-0.479	3.23E-19	9.00E-19	0.479	-59.94719222
ESRP1	Gamma_delta_T_cell	-0.38	4.07E-12	8.08E-12	0.38	-36.84888826
ESRP1	Immature_B_cell	-0.741	3.40E-55	8.16E-54	0.741	-176.355292
ESRP1	Immature_dendritic_cell	-0.231	4.18E-05	5.92E-05	0.231	-14.04508185
ESRP1	Macrophage	-0.699	9.57E-47	1.39E-45	0.699	-149.0115773
ESRP1	MDSC	-0.8	3.60E-70	1.80E-68	0.8	-225.0395293
ESRP1	Monocyte	-0.604	3.67E-32	2.07E-31	0.604	-101.9303613
ESRP1	Natural_killer_cell	-0.631	7.80E-36	5.98E-35	0.631	-113.686576
ESRP1	Natural_killer_T_cell	-0.723	1.99E-51	3.78E-50	0.723	-164.1772933
ESRP1	Neutrophil	-0.22	9.06E-05	0.000125667	0.22	-12.95811029
ESRP1	Plasmacytoid_dendritic_cell	-0.67	9.81E-42	9.85E-41	0.67	-132.8988571
ESRP1	Regulatory_T_cell	-0.627	2.97E-35	2.16E-34	0.627	-111.8364344
ESRP1	T_follicular_helper_cell	-0.541	5.53E-25	2.20E-24	0.541	-78.59202455
ESRP1	Type_1_T_helper_cell	-0.777	6.09E-64	2.59E-62	0.777	-204.5887816
ESRP1	Type_17_T_helper_cell	-0.312	2.09E-08	3.54E-08	0.312	-24.7526249
ESRP1	Type_2_T_helper_cell	0.335	1.41E-09	2.50E-09	0.335	-28.57668433
SAP18	Activated_B_cell	-0.622	1.45E-34	9.43E-34	0.622	-109.7085312
SAP18	Activated_CD4_T_cell	-0.264	2.45E-06	3.75E-06	0.264	-18.02283568
SAP18	Activated_CD8_T_cell	-0.392	7.74E-13	1.58E-12	0.392	-39.2019198
SAP18	Activated_dendritic_cell	-0.626	4.02E-35	2.88E-34	0.626	-111.4198801
SAP18	CD56dim_natural_killer_cell	-0.26	3.50E-06	5.25E-06	0.26	-17.54007615
SAP18	Eosinophil	-0.303	5.14E-08	8.51E-08	0.303	-23.48544876
SAP18	Gamma_delta_T_cell	-0.23	4.47E-05	6.31E-05	0.23	-13.95147195
SAP18	Immature_B_cell	-0.537	1.45E-24	5.39E-24	0.537	-77.29617647
SAP18	Macrophage	-0.602	6.11E-32	3.34E-31	0.602	-101.2404923
SAP18	MDSC	-0.584	9.19E-30	4.57E-29	0.584	-94.1440331
SAP18	Monocyte	-0.426	4.31E-15	9.87E-15	0.426	-46.52610862
SAP18	Natural_killer_cell	-0.469	2.36E-18	6.36E-18	0.469	-57.12572476
SAP18	Natural_killer_T_cell	-0.608	1.14E-32	6.71E-32	0.608	-103.5558551
SAP18	Neutrophil	-0.339	9.51E-10	1.69E-09	0.339	-29.13805257
SAP18	Plasmacytoid_dendritic_cell	-0.572	2.62E-28	1.20E-27	0.572	-89.4254486
SAP18	Regulatory_T_cell	-0.468	2.76E-18	7.39E-18	0.468	-56.90952716
SAP18	T_follicular_helper_cell	-0.508	9.70E-22	3.08E-21	0.508	-68.13940266
SAP18	Type_1_T_helper_cell	-0.562	3.68E-27	1.64E-26	0.562	-85.65699174
SAP18	Type_17_T_helper_cell	-0.403	1.61E-13	3.36E-13	0.403	-41.43795212
SAP18	Type_2_T_helper_cell	0.33	2.70E-09	4.68E-09	0.33	-27.67090216
NIP7	Activated_B_cell	-0.606	1.96E-32	1.11E-31	0.606	-102.8233892
NIP7	Activated_CD4_T_cell	-0.218	0.000106778	0.000146987	0.218	-12.73202772
NIP7	Activated_CD8_T_cell	-0.418	1.52E-14	3.32E-14	0.418	-44.77515937
NIP7	Activated_dendritic_cell	-0.43	2.30E-15	5.35E-15	0.43	-47.40933936
NIP7	Eosinophil	-0.307	3.48E-08	5.78E-08	0.307	-24.04472299
NIP7	Gamma_delta_T_cell	-0.262	2.99E-06	4.55E-06	0.262	-17.74610232
NIP7	Immature_B_cell	-0.495	1.44E-20	4.33E-20	0.495	-64.32314193
NIP7	Immature_dendritic_cell	-0.154	0.006420122	0.008072682	0.154	-6.952736227
NIP7	Macrophage	-0.483	1.57E-19	4.44E-19	0.483	-60.96762293
NIP7	MDSC	-0.618	4.52E-34	2.83E-33	0.618	-108.120978
NIP7	Monocyte	-0.571	3.45E-28	1.57E-27	0.571	-89.03818657
NIP7	Natural_killer_cell	-0.538	1.20E-24	4.49E-24	0.538	-77.55835563
NIP7	Natural_killer_T_cell	-0.3	7.53E-08	1.23E-07	0.3	-22.95922564
NIP7	Plasmacytoid_dendritic_cell	-0.463	7.10E-18	1.88E-17	0.463	-55.56568493
NIP7	Regulatory_T_cell	-0.516	1.82E-22	5.97E-22	0.516	-70.50539712
NIP7	T_follicular_helper_cell	-0.437	6.95E-16	1.66E-15	0.437	-49.09751594
NIP7	Type_1_T_helper_cell	-0.505	1.86E-21	5.81E-21	0.505	-67.22270948
NIP7	Type_2_T_helper_cell	0.257	4.43E-06	6.58E-06	0.257	-17.21354492
APOBEC3G	Activated_B_cell	0.739	8.57E-55	1.97E-53	0.739	-175.0831847
APOBEC3G	Activated_CD4_T_cell	0.496	1.15E-20	3.47E-20	0.496	-64.64340053
APOBEC3G	Activated_CD8_T_cell	0.634	2.59E-36	2.04E-35	0.634	-115.238031
APOBEC3G	Activated_dendritic_cell	0.522	4.94E-23	1.72E-22	0.522	-72.30364695
APOBEC3G	CD56bright_natural_killer_cell	0.263	2.57E-06	3.93E-06	0.263	-17.95680766
APOBEC3G	Eosinophil	0.473	1.03E-18	2.81E-18	0.473	-58.3060893
APOBEC3G	Gamma_delta_T_cell	0.493	1.96E-20	5.80E-20	0.493	-63.90241563
APOBEC3G	Immature_B_cell	0.732	3.23E-53	6.60E-52	0.732	-170.018696
APOBEC3G	Immature_dendritic_cell	0.227	5.65E-05	7.89E-05	0.227	-13.62960051
APOBEC3G	Macrophage	0.509	7.42E-22	2.38E-21	0.509	-68.50897846
APOBEC3G	MDSC	0.704	1.13E-47	1.79E-46	0.704	-151.9704099
APOBEC3G	Monocyte	0.235	2.98E-05	4.23E-05	0.235	-14.5280671
APOBEC3G	Natural_killer_cell	0.578	5.18E-29	2.49E-28	0.578	-91.70072589
APOBEC3G	Natural_killer_T_cell	0.655	2.26E-39	2.04E-38	0.655	-125.2017304
APOBEC3G	Neutrophil	0.268	1.73E-06	2.68E-06	0.268	-18.50743867
APOBEC3G	Plasmacytoid_dendritic_cell	0.578	5.64E-29	2.69E-28	0.578	-91.58881094
APOBEC3G	Regulatory_T_cell	0.627	2.88E-35	2.12E-34	0.627	-111.8617054
APOBEC3G	T_follicular_helper_cell	0.502	3.70E-21	1.13E-20	0.502	-66.26331788
APOBEC3G	Type_1_T_helper_cell	0.672	4.08E-42	4.34E-41	0.672	-134.0828824
APOBEC3G	Type_17_T_helper_cell	0.347	3.23E-10	5.90E-10	0.347	-30.65905862
APOBEC3G	Type_2_T_helper_cell	-0.248	1.04E-05	1.51E-05	0.248	-16.01903364
ARHGEF28	Activated_B_cell	-0.763	2.87E-60	8.34E-59	0.763	-192.9339849
ARHGEF28	Activated_CD4_T_cell	-0.347	3.55E-10	6.45E-10	0.347	-30.53014296
ARHGEF28	Activated_CD8_T_cell	-0.418	1.56E-14	3.40E-14	0.418	-44.74244279
ARHGEF28	Activated_dendritic_cell	-0.586	5.61E-30	2.82E-29	0.586	-94.84157765
ARHGEF28	Eosinophil	-0.429	2.82E-15	6.55E-15	0.429	-47.11722493
ARHGEF28	Gamma_delta_T_cell	-0.377	6.36E-12	1.25E-11	0.377	-36.21991659
ARHGEF28	Immature_B_cell	-0.711	5.21E-49	8.98E-48	0.711	-156.2859652
ARHGEF28	Macrophage	-0.514	2.51E-22	8.18E-22	0.514	-70.04969931
ARHGEF28	Mast_cell	-0.174	0.002115251	0.002753818	0.174	-8.504351258
ARHGEF28	MDSC	-0.719	1.20E-50	2.14E-49	0.719	-161.6782751
ARHGEF28	Monocyte	-0.526	1.70E-23	5.95E-23	0.526	-73.83240657
ARHGEF28	Natural_killer_cell	-0.625	5.19E-35	3.62E-34	0.625	-111.0882366
ARHGEF28	Natural_killer_T_cell	-0.625	5.48E-35	3.74E-34	0.625	-111.0440415
ARHGEF28	Neutrophil	-0.245	1.32E-05	1.91E-05	0.245	-15.67279879
ARHGEF28	Plasmacytoid_dendritic_cell	-0.66	3.65E-40	3.47E-39	0.66	-127.7601996
ARHGEF28	Regulatory_T_cell	-0.579	3.54E-29	1.71E-28	0.579	-92.23739616
ARHGEF28	T_follicular_helper_cell	-0.464	6.24E-18	1.66E-17	0.464	-55.74412269
ARHGEF28	Type_1_T_helper_cell	-0.722	3.18E-51	5.84E-50	0.722	-163.5493906
ARHGEF28	Type_17_T_helper_cell	-0.347	3.57E-10	6.45E-10	0.347	-30.52896965
ARHGEF28	Type_2_T_helper_cell	0.31	2.41E-08	4.05E-08	0.31	-24.55813733
IREB2	Activated_B_cell	-0.478	4.05E-19	1.11E-18	0.478	-59.64128476
IREB2	Activated_CD4_T_cell	-0.233	3.56E-05	5.05E-05	0.233	-14.27306633
IREB2	Activated_CD8_T_cell	-0.372	1.39E-11	2.68E-11	0.372	-35.11855068
IREB2	Activated_dendritic_cell	-0.421	9.84E-15	2.19E-14	0.421	-45.37564244
IREB2	CD56bright_natural_killer_cell	-0.167	0.003263631	0.00417987	0.167	-7.902326118
IREB2	Eosinophil	-0.274	9.86E-07	1.55E-06	0.274	-19.30227465
IREB2	Gamma_delta_T_cell	-0.261	3.13E-06	4.73E-06	0.261	-17.68974584
IREB2	Immature_B_cell	-0.384	2.41E-12	4.83E-12	0.384	-37.59013904
IREB2	Immature_dendritic_cell	-0.161	0.004495031	0.005743651	0.161	-7.443816234
IREB2	Macrophage	-0.458	1.63E-17	4.26E-17	0.458	-54.38267072
IREB2	MDSC	-0.534	3.00E-24	1.10E-23	0.534	-76.27070499
IREB2	Monocyte	-0.543	3.40E-25	1.39E-24	0.543	-79.2518178
IREB2	Natural_killer_cell	-0.423	6.98E-15	1.57E-14	0.423	-45.85972092
IREB2	Natural_killer_T_cell	-0.387	1.58E-12	3.21E-12	0.387	-38.17964755
IREB2	Plasmacytoid_dendritic_cell	-0.303	5.23E-08	8.64E-08	0.303	-23.46409667
IREB2	Regulatory_T_cell	-0.424	6.05E-15	1.38E-14	0.424	-46.04754846
IREB2	T_follicular_helper_cell	-0.415	2.38E-14	5.16E-14	0.415	-44.13924539
IREB2	Type_1_T_helper_cell	-0.485	1.14E-19	3.26E-19	0.485	-61.41022483
IREB2	Type_17_T_helper_cell	-0.326	4.27E-09	7.34E-09	0.326	-27.02195286
IREB2	Type_2_T_helper_cell	0.345	4.46E-10	8.05E-10	0.345	-30.21109769
SIDT1	Activated_B_cell	0.757	7.40E-59	2.04E-57	0.757	-188.3203236
SIDT1	Activated_CD4_T_cell	0.622	1.30E-34	8.55E-34	0.622	-109.8503013
SIDT1	Activated_CD8_T_cell	0.641	2.97E-37	2.52E-36	0.641	-118.2560778
SIDT1	Activated_dendritic_cell	0.379	4.88E-12	9.62E-12	0.379	-36.59676865
SIDT1	CD56bright_natural_killer_cell	0.361	5.40E-11	1.01E-10	0.361	-33.19978159
SIDT1	CD56dim_natural_killer_cell	-0.167	0.003218659	0.004131859	0.167	-7.918993103
SIDT1	Eosinophil	0.654	3.68E-39	3.28E-38	0.654	-124.5200016
SIDT1	Gamma_delta_T_cell	0.538	1.07E-24	4.06E-24	0.538	-77.70559759
SIDT1	Immature_B_cell	0.764	1.16E-60	3.77E-59	0.764	-194.0788345
SIDT1	Immature_dendritic_cell	0.274	9.71E-07	1.53E-06	0.274	-19.32139416
SIDT1	Macrophage	0.521	5.34E-23	1.84E-22	0.521	-72.20051196
SIDT1	Mast_cell	0.236	2.72E-05	3.89E-05	0.236	-14.64924813
SIDT1	MDSC	0.767	2.09E-61	7.20E-60	0.767	-196.4683047
SIDT1	Monocyte	0.342	5.92E-10	1.06E-09	0.342	-29.8109108
SIDT1	Natural_killer_cell	0.362	5.19E-11	9.81E-11	0.362	-33.24649135
SIDT1	Natural_killer_T_cell	0.559	6.96E-27	3.07E-26	0.559	-84.75083297
SIDT1	Plasmacytoid_dendritic_cell	0.502	3.43E-21	1.05E-20	0.502	-66.36709025
SIDT1	Regulatory_T_cell	0.69	4.07E-45	5.23E-44	0.69	-143.7788879
SIDT1	T_follicular_helper_cell	0.542	4.54E-25	1.82E-24	0.542	-78.8647464
SIDT1	Type_1_T_helper_cell	0.681	1.15E-43	1.35E-42	0.681	-139.0853678
ENDOU	Activated_B_cell	-0.685	2.44E-44	3.06E-43	0.685	-141.2279788
ENDOU	Activated_CD4_T_cell	-0.484	1.27E-19	3.62E-19	0.484	-61.26088782
ENDOU	Activated_CD8_T_cell	-0.452	4.75E-17	1.21E-16	0.452	-52.87182097
ENDOU	Activated_dendritic_cell	-0.46	1.19E-17	3.14E-17	0.46	-54.8228278
ENDOU	CD56bright_natural_killer_cell	-0.292	1.67E-07	2.68E-07	0.292	-21.83173834
ENDOU	Eosinophil	-0.521	5.63E-23	1.93E-22	0.521	-72.13260624
ENDOU	Gamma_delta_T_cell	-0.386	1.99E-12	4.02E-12	0.386	-37.85601447
ENDOU	Immature_B_cell	-0.699	7.60E-47	1.13E-45	0.699	-149.3053007
ENDOU	Immature_dendritic_cell	-0.259	3.82E-06	5.70E-06	0.259	-17.42132708
ENDOU	Macrophage	-0.622	1.53E-34	9.80E-34	0.622	-109.6531424
ENDOU	Mast_cell	-0.217	0.000119904	0.00016383	0.217	-12.5755153
ENDOU	MDSC	-0.669	1.21E-41	1.20E-40	0.669	-132.6187041
ENDOU	Monocyte	-0.366	2.91E-11	5.53E-11	0.366	-34.07496074
ENDOU	Natural_killer_cell	-0.541	5.60E-25	2.21E-24	0.541	-78.58341151
ENDOU	Natural_killer_T_cell	-0.552	3.75E-26	1.62E-25	0.552	-82.35552091
ENDOU	Plasmacytoid_dendritic_cell	-0.503	2.92E-21	8.99E-21	0.503	-66.59183913
ENDOU	Regulatory_T_cell	-0.607	1.35E-32	7.82E-32	0.607	-103.3337345
ENDOU	T_follicular_helper_cell	-0.423	6.52E-15	1.47E-14	0.423	-45.95222596
ENDOU	Type_1_T_helper_cell	-0.667	2.54E-41	2.46E-40	0.667	-131.5804476
ENDOU	Type_17_T_helper_cell	-0.293	1.50E-07	2.41E-07	0.293	-21.98439384
SPATS2	Activated_B_cell	0.853	4.92E-89	6.78E-87	0.853	-286.2454875
SPATS2	Activated_CD4_T_cell	0.415	2.44E-14	5.25E-14	0.415	-44.11394636
SPATS2	Activated_CD8_T_cell	0.406	9.45E-14	2.00E-13	0.406	-42.18614596
SPATS2	Activated_dendritic_cell	0.479	3.69E-19	1.02E-18	0.479	-59.76855088
SPATS2	CD56bright_natural_killer_cell	0.159	0.005011832	0.006359842	0.159	-7.296793375
SPATS2	CD56dim_natural_killer_cell	-0.198	0.000464395	0.000619193	0.198	-10.65732268
SPATS2	Eosinophil	0.483	1.47E-19	4.16E-19	0.483	-61.06057929
SPATS2	Gamma_delta_T_cell	0.527	1.37E-23	4.83E-23	0.527	-74.13116534
SPATS2	Immature_B_cell	0.816	2.29E-75	1.58E-73	0.816	-241.8411447
SPATS2	Immature_dendritic_cell	0.217	0.000113332	0.000155233	0.217	-12.65327395
SPATS2	Macrophage	0.464	6.07E-18	1.62E-17	0.464	-55.77683989
SPATS2	MDSC	0.757	8.93E-59	2.35E-57	0.757	-188.1196294
SPATS2	Monocyte	0.405	1.16E-13	2.45E-13	0.405	-41.89258099
SPATS2	Natural_killer_cell	0.493	2.17E-20	6.31E-20	0.493	-63.78065153
SPATS2	Natural_killer_T_cell	0.546	1.95E-25	8.08E-25	0.546	-80.03450569
SPATS2	Plasmacytoid_dendritic_cell	0.708	1.89E-48	3.07E-47	0.708	-154.5147237
SPATS2	Regulatory_T_cell	0.635	2.43E-36	1.95E-35	0.635	-115.305735
SPATS2	T_follicular_helper_cell	0.408	7.45E-14	1.58E-13	0.408	-42.52289114
SPATS2	Type_1_T_helper_cell	0.673	2.68E-42	2.96E-41	0.673	-134.6320581
ISG20	Activated_B_cell	0.889	9.91E-107	5.47E-104	0.889	-343.0282285
ISG20	Activated_CD4_T_cell	0.371	1.42E-11	2.71E-11	0.371	-35.10093911
ISG20	Activated_CD8_T_cell	0.519	9.31E-23	3.13E-22	0.519	-71.43503583
ISG20	Activated_dendritic_cell	0.583	1.43E-29	7.03E-29	0.583	-93.52283329
ISG20	Eosinophil	0.489	4.71E-20	1.35E-19	0.489	-62.68009011
ISG20	Gamma_delta_T_cell	0.506	1.39E-21	4.39E-21	0.506	-67.62727782
ISG20	Immature_B_cell	0.811	9.03E-74	5.54E-72	0.811	-236.7093752
ISG20	Macrophage	0.493	2.16E-20	6.31E-20	0.493	-63.78065153
ISG20	MDSC	0.82	9.00E-77	8.28E-75	0.82	-246.0955124
ISG20	Monocyte	0.542	4.07E-25	1.64E-24	0.542	-79.01100481
ISG20	Natural_killer_cell	0.643	1.49E-37	1.29E-36	0.643	-119.2254455
ISG20	Natural_killer_T_cell	0.618	5.07E-34	3.14E-33	0.618	-107.9709083
ISG20	Plasmacytoid_dendritic_cell	0.734	1.13E-53	2.40E-52	0.734	-171.4771992
ISG20	Regulatory_T_cell	0.645	8.41E-38	7.37E-37	0.645	-120.0306426
ISG20	T_follicular_helper_cell	0.53	7.64E-24	2.75E-23	0.53	-74.94244048
ISG20	Type_1_T_helper_cell	0.763	2.02E-60	6.20E-59	0.763	-193.3620023
ISG20	Type_17_T_helper_cell	0.169	0.002887436	0.003732705	0.169	-8.065562942
ISG20	Type_2_T_helper_cell	-0.295	1.18E-07	1.91E-07	0.295	-22.32050699
ESF1	Activated_B_cell	-0.543	3.75E-25	1.52E-24	0.543	-79.11838414
ESF1	Activated_CD8_T_cell	-0.385	2.05E-12	4.13E-12	0.385	-37.81573448
ESF1	Activated_dendritic_cell	-0.586	5.56E-30	2.82E-29	0.586	-94.84277433
ESF1	Eosinophil	-0.195	0.000566245	0.000753174	0.195	-10.37472927
ESF1	Gamma_delta_T_cell	-0.192	0.00066156	0.000877839	0.192	-10.1537553
ESF1	Immature_B_cell	-0.394	5.94E-13	1.22E-12	0.394	-39.57664175
ESF1	Macrophage	-0.494	1.63E-20	4.85E-20	0.494	-64.16073577
ESF1	MDSC	-0.576	7.99E-29	3.74E-28	0.576	-91.11203135
ESF1	Monocyte	-0.623	8.75E-35	5.82E-34	0.623	-110.4048858
ESF1	Natural_killer_cell	-0.538	1.15E-24	4.34E-24	0.538	-77.60894772
ESF1	Natural_killer_T_cell	-0.426	4.57E-15	1.04E-14	0.426	-46.44693837
ESF1	Plasmacytoid_dendritic_cell	-0.441	3.63E-16	8.74E-16	0.441	-50.02305992
ESF1	Regulatory_T_cell	-0.42	1.05E-14	2.33E-14	0.42	-45.28644447
ESF1	T_follicular_helper_cell	-0.497	9.65E-21	2.93E-20	0.497	-64.88933208
ESF1	Type_1_T_helper_cell	-0.538	1.24E-24	4.61E-24	0.538	-77.52002041
ESF1	Type_17_T_helper_cell	-0.334	1.72E-09	3.03E-09	0.334	-28.30016662
ESF1	Type_2_T_helper_cell	0.452	4.88E-17	1.24E-16	0.452	-52.83862604
PUS7	Activated_B_cell	-0.639	6.06E-37	5.00E-36	0.639	-117.2685184
PUS7	Activated_CD8_T_cell	-0.456	2.57E-17	6.62E-17	0.456	-53.74602363
PUS7	Activated_dendritic_cell	-0.67	8.86E-42	9.05E-41	0.67	-133.0205625
PUS7	CD56dim_natural_killer_cell	-0.22	9.56E-05	0.00013219	0.22	-12.88509672
PUS7	Eosinophil	-0.227	5.42E-05	7.61E-05	0.227	-13.68172555
PUS7	Gamma_delta_T_cell	-0.204	0.000302365	0.000408082	0.204	-11.25885202
PUS7	Immature_B_cell	-0.54	8.09E-25	3.12E-24	0.54	-78.08266053
PUS7	Macrophage	-0.603	4.28E-32	2.36E-31	0.603	-101.7403036
PUS7	MDSC	-0.631	8.37E-36	6.33E-35	0.631	-113.6063046
PUS7	Monocyte	-0.531	6.26E-24	2.27E-23	0.531	-75.22043082
PUS7	Natural_killer_cell	-0.611	4.22E-33	2.50E-32	0.611	-104.977324
PUS7	Natural_killer_T_cell	-0.519	8.36E-23	2.85E-22	0.519	-71.57192057
PUS7	Neutrophil	-0.251	7.38E-06	1.07E-05	0.251	-16.50539981
PUS7	Plasmacytoid_dendritic_cell	-0.606	1.80E-32	1.04E-31	0.606	-102.9262998
PUS7	Regulatory_T_cell	-0.432	1.57E-15	3.68E-15	0.432	-47.94809586
PUS7	T_follicular_helper_cell	-0.548	1.17E-25	4.97E-25	0.548	-80.73624279
PUS7	Type_1_T_helper_cell	-0.527	1.43E-23	5.02E-23	0.527	-74.07613777
PUS7	Type_17_T_helper_cell	-0.298	9.12E-08	1.48E-07	0.298	-22.69226298
PUS7	Type_2_T_helper_cell	0.376	7.79E-12	1.53E-11	0.376	-35.93166272
WARS	Activated_B_cell	0.771	2.45E-62	9.66E-61	0.771	-199.3648913
WARS	Activated_CD4_T_cell	0.517	1.34E-22	4.47E-22	0.517	-70.92363934
WARS	Activated_CD8_T_cell	0.613	2.60E-33	1.56E-32	0.613	-105.6596946
WARS	Activated_dendritic_cell	0.595	5.13E-31	2.67E-30	0.595	-98.24002366
WARS	CD56bright_natural_killer_cell	0.273	1.10E-06	1.71E-06	0.273	-19.1553817
WARS	CD56dim_natural_killer_cell	-0.152	0.007156481	0.008978131	0.152	-6.79936919
WARS	Eosinophil	0.506	1.58E-21	4.95E-21	0.506	-67.4533761
WARS	Gamma_delta_T_cell	0.54	7.85E-25	3.05E-24	0.54	-78.11622499
WARS	Immature_B_cell	0.729	1.37E-52	2.70E-51	0.729	-167.9828046
WARS	Immature_dendritic_cell	0.24	1.96E-05	2.82E-05	0.24	-15.11384702
WARS	Macrophage	0.539	8.48E-25	3.25E-24	0.539	-78.0247241
WARS	Mast_cell	0.185	0.001042342	0.00137649	0.185	-9.504789988
WARS	MDSC	0.799	5.33E-70	2.45E-68	0.799	-224.598476
WARS	Monocyte	0.503	2.53E-21	7.86E-21	0.503	-66.78580222
WARS	Natural_killer_cell	0.632	6.30E-36	4.90E-35	0.632	-113.9743963
WARS	Natural_killer_T_cell	0.626	4.07E-35	2.88E-34	0.626	-111.4198801
WARS	Neutrophil	0.168	0.002971747	0.00383272	0.168	-8.027415638
WARS	Plasmacytoid_dendritic_cell	0.673	2.77E-42	3.00E-41	0.673	-134.6130113
WARS	Regulatory_T_cell	0.678	4.38E-43	4.94E-42	0.678	-137.2175891
WARS	T_follicular_helper_cell	0.603	4.23E-32	2.36E-31	0.603	-101.743576
WARS	Type_1_T_helper_cell	0.75	2.40E-57	6.02E-56	0.75	-183.4390989
WARS	Type_17_T_helper_cell	0.272	1.13E-06	1.76E-06	0.272	-19.11357703
GNL2	Activated_B_cell	-0.368	2.22E-11	4.22E-11	0.368	-34.46282841
GNL2	Activated_CD8_T_cell	-0.314	1.52E-08	2.59E-08	0.314	-25.20372062
GNL2	Activated_dendritic_cell	-0.457	2.30E-17	5.96E-17	0.457	-53.89796476
GNL2	Immature_B_cell	-0.311	2.21E-08	3.72E-08	0.311	-24.68203287
GNL2	Macrophage	-0.493	2.08E-20	6.11E-20	0.493	-63.8274745
GNL2	MDSC	-0.436	7.59E-16	1.80E-15	0.436	-48.9817703
GNL2	Monocyte	-0.442	2.92E-16	7.14E-16	0.442	-50.31450837
GNL2	Natural_killer_cell	-0.286	3.11E-07	4.93E-07	0.286	-20.95307033
GNL2	Natural_killer_T_cell	-0.351	1.96E-10	3.62E-10	0.351	-31.36277954
GNL2	Plasmacytoid_dendritic_cell	-0.333	1.78E-09	3.12E-09	0.333	-28.25437208
GNL2	Regulatory_T_cell	-0.267	1.87E-06	2.90E-06	0.267	-18.39472206
GNL2	T_follicular_helper_cell	-0.381	3.73E-12	7.44E-12	0.381	-36.9678939
GNL2	Type_1_T_helper_cell	-0.347	3.31E-10	6.03E-10	0.347	-30.62607847
GNL2	Type_17_T_helper_cell	-0.172	0.002431285	0.00315781	0.172	-8.306859693
GNL2	Type_2_T_helper_cell	0.201	0.000364155	0.000490278	0.201	-10.99411351
AZGP1	Activated_B_cell	-0.442	3.16E-16	7.68E-16	0.442	-50.21067802
AZGP1	Activated_CD4_T_cell	-0.335	1.42E-09	2.51E-09	0.335	-28.56987237
AZGP1	Activated_CD8_T_cell	-0.29	1.99E-07	3.17E-07	0.29	-21.58788469
AZGP1	Activated_dendritic_cell	-0.33	2.49E-09	4.35E-09	0.33	-27.77598114
AZGP1	Eosinophil	-0.335	1.52E-09	2.67E-09	0.335	-28.47804745
AZGP1	Immature_B_cell	-0.433	1.27E-15	2.99E-15	0.433	-48.25115613
AZGP1	Immature_dendritic_cell	-0.258	4.22E-06	6.28E-06	0.258	-17.28168911
AZGP1	Macrophage	-0.373	1.09E-11	2.11E-11	0.373	-35.46426797
AZGP1	MDSC	-0.404	1.27E-13	2.66E-13	0.404	-41.77208269
AZGP1	Natural_killer_cell	-0.343	5.33E-10	9.58E-10	0.343	-29.95990667
AZGP1	Natural_killer_T_cell	-0.403	1.44E-13	3.02E-13	0.403	-41.59164012
AZGP1	Plasmacytoid_dendritic_cell	-0.266	1.98E-06	3.05E-06	0.266	-18.32201307
AZGP1	Regulatory_T_cell	-0.397	3.61E-13	7.43E-13	0.397	-40.29123344
AZGP1	T_follicular_helper_cell	-0.253	6.22E-06	9.11E-06	0.253	-16.74364583
AZGP1	Type_1_T_helper_cell	-0.447	1.27E-16	3.15E-16	0.447	-51.49772381
AZGP1	Type_17_T_helper_cell	-0.31	2.61E-08	4.36E-08	0.31	-24.45067556
ZC3H12D	Activated_B_cell	0.698	1.17E-46	1.66E-45	0.698	-148.7587929
ZC3H12D	Activated_CD4_T_cell	0.685	3.33E-44	4.00E-43	0.685	-140.8436194
ZC3H12D	Activated_CD8_T_cell	0.625	5.89E-35	3.97E-34	0.625	-110.9575511
ZC3H12D	Activated_dendritic_cell	0.26	3.46E-06	5.20E-06	0.26	-17.55218546
ZC3H12D	CD56bright_natural_killer_cell	0.444	2.00E-16	4.91E-16	0.444	-50.85396103
ZC3H12D	CD56dim_natural_killer_cell	-0.246	1.15E-05	1.67E-05	0.246	-15.87048455
ZC3H12D	Eosinophil	0.685	3.02E-44	3.70E-43	0.685	-140.9536444
ZC3H12D	Gamma_delta_T_cell	0.587	4.10E-30	2.10E-29	0.587	-95.26787012
ZC3H12D	Immature_B_cell	0.738	1.23E-54	2.71E-53	0.738	-174.6262955
ZC3H12D	Immature_dendritic_cell	0.26	3.51E-06	5.26E-06	0.26	-17.53733903
ZC3H12D	Macrophage	0.441	3.57E-16	8.65E-16	0.441	-50.03794419
ZC3H12D	Mast_cell	0.291	1.88E-07	3.00E-07	0.291	-21.66754077
ZC3H12D	MDSC	0.709	1.11E-48	1.86E-47	0.709	-155.2372596
ZC3H12D	Monocyte	0.256	5.05E-06	7.47E-06	0.256	-17.03053129
ZC3H12D	Natural_killer_cell	0.324	5.29E-09	9.06E-09	0.324	-26.71755784
ZC3H12D	Natural_killer_T_cell	0.494	1.93E-20	5.74E-20	0.494	-63.91778106
ZC3H12D	Plasmacytoid_dendritic_cell	0.457	2.18E-17	5.68E-17	0.457	-53.96581457
ZC3H12D	Regulatory_T_cell	0.696	2.72E-46	3.66E-45	0.696	-147.6159178
ZC3H12D	T_follicular_helper_cell	0.418	1.51E-14	3.32E-14	0.418	-44.77515937
ZC3H12D	Type_1_T_helper_cell	0.66	3.72E-40	3.48E-39	0.66	-127.7549741
EIF4E	Activated_B_cell	-0.558	9.39E-27	4.12E-26	0.558	-84.3289432
EIF4E	Activated_CD8_T_cell	-0.311	2.13E-08	3.59E-08	0.311	-24.73033681
EIF4E	Activated_dendritic_cell	-0.616	8.90E-34	5.46E-33	0.616	-107.174775
EIF4E	Eosinophil	-0.19	0.000793868	0.001050876	0.19	-9.894192084
EIF4E	Immature_B_cell	-0.448	1.06E-16	2.63E-16	0.448	-51.75624092
EIF4E	Macrophage	-0.508	9.05E-22	2.89E-21	0.508	-68.23040598
EIF4E	MDSC	-0.575	1.11E-28	5.13E-28	0.575	-90.65397166
EIF4E	Monocyte	-0.695	5.13E-46	6.75E-45	0.695	-146.7329377
EIF4E	Natural_killer_cell	-0.656	1.42E-39	1.30E-38	0.656	-125.8521718
EIF4E	Natural_killer_T_cell	-0.371	1.44E-11	2.74E-11	0.371	-35.08572279
EIF4E	Plasmacytoid_dendritic_cell	-0.514	2.57E-22	8.35E-22	0.514	-70.01982286
EIF4E	Regulatory_T_cell	-0.374	9.50E-12	1.85E-11	0.374	-35.65206486
EIF4E	T_follicular_helper_cell	-0.474	9.07E-19	2.48E-18	0.474	-58.48466601
EIF4E	Type_1_T_helper_cell	-0.519	8.56E-23	2.90E-22	0.519	-71.54774851
EIF4E	Type_17_T_helper_cell	-0.2	0.000406425	0.000544531	0.2	-10.84269864
EIF4E	Type_2_T_helper_cell	0.357	9.55E-11	1.78E-10	0.357	-32.38630105
ERN1	Activated_B_cell	0.702	2.63E-47	4.03E-46	0.702	-150.7966495
ERN1	Activated_CD4_T_cell	0.417	1.75E-14	3.81E-14	0.417	-44.57881031
ERN1	Activated_CD8_T_cell	0.327	3.58E-09	6.19E-09	0.327	-27.26698045
ERN1	Activated_dendritic_cell	0.326	4.24E-09	7.31E-09	0.326	-27.02697742
ERN1	CD56dim_natural_killer_cell	-0.318	1.01E-08	1.72E-08	0.318	-25.7905387
ERN1	Eosinophil	0.479	3.53E-19	9.78E-19	0.479	-59.82607717
ERN1	Gamma_delta_T_cell	0.428	3.25E-15	7.51E-15	0.428	-46.92062696
ERN1	Immature_B_cell	0.671	6.54E-42	6.81E-41	0.671	-133.4314993
ERN1	Macrophage	0.373	1.12E-11	2.18E-11	0.373	-35.41924356
ERN1	Mast_cell	0.213	0.000155372	0.000210725	0.213	-12.21235033
ERN1	MDSC	0.641	3.18E-37	2.66E-36	0.641	-118.178423
ERN1	Monocyte	0.38	4.17E-12	8.24E-12	0.38	-36.81991948
ERN1	Natural_killer_cell	0.388	1.40E-12	2.85E-12	0.388	-38.35386706
ERN1	Natural_killer_T_cell	0.41	5.78E-14	1.24E-13	0.41	-42.87851844
ERN1	Plasmacytoid_dendritic_cell	0.547	1.37E-25	5.75E-25	0.547	-80.52341567
ERN1	Regulatory_T_cell	0.58	3.04E-29	1.49E-28	0.58	-92.4413774
ERN1	T_follicular_helper_cell	0.352	1.80E-10	3.33E-10	0.352	-31.48543529
ERN1	Type_1_T_helper_cell	0.597	2.56E-31	1.35E-30	0.597	-99.22747733
INTS7	Activated_B_cell	-0.431	1.88E-15	4.39E-15	0.431	-47.69442037
INTS7	Activated_CD8_T_cell	-0.283	4.07E-07	6.43E-07	0.283	-20.56804138
INTS7	Activated_dendritic_cell	-0.625	5.43E-35	3.74E-34	0.625	-111.0440415
INTS7	CD56dim_natural_killer_cell	-0.44	4.15E-16	9.96E-16	0.44	-49.83537832
INTS7	Immature_B_cell	-0.361	5.39E-11	1.01E-10	0.361	-33.19978159
INTS7	Macrophage	-0.516	1.59E-22	5.26E-22	0.516	-70.68761801
INTS7	MDSC	-0.409	6.25E-14	1.33E-13	0.409	-42.77060834
INTS7	Monocyte	-0.451	5.90E-17	1.49E-16	0.451	-52.57241635
INTS7	Natural_killer_cell	-0.361	5.51E-11	1.03E-10	0.361	-33.17573862
INTS7	Natural_killer_T_cell	-0.53	8.28E-24	2.97E-23	0.53	-74.83404696
INTS7	Neutrophil	-0.303	5.42E-08	8.88E-08	0.303	-23.42467299
INTS7	Plasmacytoid_dendritic_cell	-0.437	7.17E-16	1.71E-15	0.437	-49.05790595
INTS7	Regulatory_T_cell	-0.227	5.53E-05	7.75E-05	0.227	-13.65469346
INTS7	T_follicular_helper_cell	-0.483	1.68E-19	4.70E-19	0.483	-60.88530751
INTS7	Type_1_T_helper_cell	-0.402	1.94E-13	4.02E-13	0.402	-41.17856473
INTS7	Type_17_T_helper_cell	-0.424	6.32E-15	1.43E-14	0.424	-45.99011705
INTS7	Type_2_T_helper_cell	0.419	1.35E-14	2.97E-14	0.419	-44.93664271
TPR	Activated_B_cell	-0.449	8.17E-17	2.04E-16	0.449	-52.12241245
TPR	Activated_CD8_T_cell	-0.352	1.75E-10	3.25E-10	0.352	-31.5170728
TPR	Activated_dendritic_cell	-0.529	9.49E-24	3.38E-23	0.529	-74.64692841
TPR	CD56dim_natural_killer_cell	-0.303	5.25E-08	8.65E-08	0.303	-23.46263779
TPR	Immature_B_cell	-0.303	5.30E-08	8.71E-08	0.303	-23.45309664
TPR	Macrophage	-0.415	2.61E-14	5.61E-14	0.415	-44.01894226
TPR	MDSC	-0.451	6.67E-17	1.68E-16	0.451	-52.40220764
TPR	Monocyte	-0.428	3.32E-15	7.63E-15	0.428	-46.8981391
TPR	Natural_killer_cell	-0.35	2.34E-10	4.31E-10	0.35	-31.11134443
TPR	Natural_killer_T_cell	-0.511	5.31E-22	1.71E-21	0.511	-68.98347552
TPR	Neutrophil	-0.318	1.09E-08	1.85E-08	0.318	-25.68804039
TPR	Plasmacytoid_dendritic_cell	-0.302	5.73E-08	9.36E-08	0.302	-23.34959552
TPR	Regulatory_T_cell	-0.265	2.14E-06	3.29E-06	0.265	-18.21235856
TPR	T_follicular_helper_cell	-0.453	4.05E-17	1.04E-16	0.453	-53.09410161
TPR	Type_1_T_helper_cell	-0.402	1.78E-13	3.69E-13	0.402	-41.30297031
TPR	Type_17_T_helper_cell	-0.469	2.22E-18	6.01E-18	0.469	-57.20774515
TPR	Type_2_T_helper_cell	0.601	9.01E-32	4.87E-31	0.601	-100.6947029
RRBP1	Activated_B_cell	0.6	1.04E-31	5.59E-31	0.6	-100.4973269
RRBP1	Activated_CD8_T_cell	0.262	2.92E-06	4.45E-06	0.262	-17.77705171
RRBP1	Activated_dendritic_cell	0.577	6.67E-29	3.15E-28	0.577	-91.35932362
RRBP1	Eosinophil	0.238	2.34E-05	3.35E-05	0.238	-14.8655145
RRBP1	Immature_B_cell	0.535	2.40E-24	8.85E-24	0.535	-76.58065534
RRBP1	Macrophage	0.45	7.64E-17	1.92E-16	0.45	-52.21203832
RRBP1	MDSC	0.55	6.34E-26	2.71E-25	0.55	-81.60849394
RRBP1	Monocyte	0.518	1.15E-22	3.83E-22	0.518	-71.14353664
RRBP1	Natural_killer_cell	0.546	1.65E-25	6.88E-25	0.546	-80.26534739
RRBP1	Natural_killer_T_cell	0.422	7.54E-15	1.68E-14	0.422	-45.75469073
RRBP1	Plasmacytoid_dendritic_cell	0.587	3.85E-30	1.99E-29	0.587	-95.3451253
RRBP1	Regulatory_T_cell	0.341	7.27E-10	1.30E-09	0.341	-29.52044403
RRBP1	T_follicular_helper_cell	0.382	3.45E-12	6.91E-12	0.382	-37.07476582
RRBP1	Type_1_T_helper_cell	0.492	2.61E-20	7.54E-20	0.492	-63.52343491
RRBP1	Type_17_T_helper_cell	0.176	0.001868159	0.002443659	0.176	-8.676741545
RRBP1	Type_2_T_helper_cell	-0.222	8.30E-05	0.000115379	0.222	-13.08133065
DDX6	Activated_B_cell	0.255	5.66E-06	8.35E-06	0.255	-16.86902972
DDX6	Activated_CD4_T_cell	0.182	0.001255433	0.001653936	0.182	-9.239881137
DDX6	Activated_dendritic_cell	0.179	0.001514267	0.001985453	0.179	-8.976316189
DDX6	CD56dim_natural_killer_cell	-0.3	7.59E-08	1.23E-07	0.3	-22.95205552
DDX6	Eosinophil	0.198	0.000463825	0.000619193	0.198	-10.65732268
DDX6	Gamma_delta_T_cell	0.174	0.002062205	0.002691104	0.174	-8.537585918
DDX6	Immature_B_cell	0.266	1.96E-06	3.02E-06	0.266	-18.33511917
DDX6	Immature_dendritic_cell	0.224	6.71E-05	9.36E-05	0.224	-13.38351517
DDX6	Macrophage	0.161	0.00460257	0.00585396	0.161	-7.416371382
DDX6	MDSC	0.277	7.09E-07	1.12E-06	0.277	-19.77031513
DDX6	Monocyte	0.18	0.001502514	0.001974732	0.18	-8.9841272
DDX6	Natural_killer_cell	0.33	2.62E-09	4.57E-09	0.33	-27.7066546
DDX6	Plasmacytoid_dendritic_cell	0.295	1.19E-07	1.91E-07	0.295	-22.31803502
DDX6	Regulatory_T_cell	0.254	5.70E-06	8.39E-06	0.254	-16.86244158
DDX6	Type_1_T_helper_cell	0.262	3.00E-06	4.55E-06	0.262	-17.74610232
SF1	Activated_B_cell	-0.213	0.000155052	0.000210725	0.213	-12.21235033
SF1	Activated_CD4_T_cell	-0.216	0.000130782	0.000178251	0.216	-12.45379998
SF1	Activated_CD8_T_cell	-0.2	0.000389014	0.000522472	0.2	-10.90235879
SF1	CD56dim_natural_killer_cell	0.15	0.007988184	0.009998815	0.15	-6.644027126
SF1	Gamma_delta_T_cell	-0.228	5.21E-05	7.33E-05	0.228	-13.73592184
SF1	Immature_B_cell	-0.171	0.00258664	0.003351703	0.171	-8.220889916
SF1	Immature_dendritic_cell	-0.235	2.87E-05	4.09E-05	0.235	-14.57693484
SF1	Macrophage	-0.218	0.000107178	0.000147169	0.218	-12.73023462
SF1	MDSC	-0.242	1.62E-05	2.34E-05	0.242	-15.38449166
SF1	Monocyte	-0.254	6.01E-06	8.83E-06	0.254	-16.78930747
SF1	Natural_killer_cell	-0.167	0.003119679	0.004014133	0.167	-7.96069601
SF1	Natural_killer_T_cell	-0.155	0.006161493	0.007765169	0.155	-7.008766924
SF1	Regulatory_T_cell	-0.308	2.96E-08	4.94E-08	0.308	-24.27213072
SF1	T_follicular_helper_cell	-0.155	0.006138274	0.00775361	0.155	-7.010916161
SF1	Type_1_T_helper_cell	-0.253	6.27E-06	9.16E-06	0.253	-16.73665076
SF1	Type_17_T_helper_cell	-0.158	0.005177065	0.006554449	0.158	-7.25330973
