# Supplementary material for: Crosstalk between RNA-Binding Proteins and Immune Microenvironment Revealed Two RBP Regulatory Patterns with Distinct Immunophenotypes in Periodontitis
Source: J Immunol Res. 2021 Jul 5;2021:5588429. doi: 10.1155/2021/5588429 (PMC8275429; doi:10.1155/2021/5588429)
Supplement: Supplementary Materials — Supplementary figures (FigureS1-S3) were uploaded entitled “supplementary figures.docx.” Supplementary tables (Table S1-S12) were uploaded entitled “Table S1: significantly dysregulated RBPs .txt.” “Table S2: results of univariate logistic regression.txt.” “Table S3: results of multivariate logistic regression.txt.” “Table S4: diversity of immunocytes between healthy and periodontitis samples.txt.” “Table S5: correlation analysis between immnuocytes and RBPs.txt.” “Table S6: diversity of immune pathways between healthy and periodontitis samples.txt.” “Table S7: Correlations between RBPs and immune pathways.txt.” “Table S8: diversity of HLA expression between healthy and periodontitis samples.txt.” “Table S9: correlation between RBPs and HLA expression.txt.” “Table S10: RBP regulatory subtypes.txt.” “Table S11: RBP regulatory subtype related genes.txt.” “Table S12: gene significance and module membership.txt,” respectively, with their filename indicating the contents of the tables. [file 5588429.f1.zip › 5588429.f1/Table S6. Diversity of immune pathways between healthy and periodontitis samples..txt]

Table S6. Diversity of immune pathways between healthy and periodontitis samples.
ID	control	treat	FC	pvalue
Antigen_Processing_and_Presentation	0.232829877	0.244056786	1.048219366	1.63E-11
Antimicrobials	0.126458956	0.146051936	1.154935491	2.33E-19
BCRSignalingPathway	0.189246934	0.239929328	1.26781091	3.77E-24
Chemokine_Receptors	0.026075673	0.069281699	2.656947727	4.14E-21
Chemokines	0.083089047	0.115883381	1.394689002	1.59E-15
Cytokine_Receptors	0.035330253	0.054365591	1.538782966	2.50E-20
Cytokines	-0.028409514	-0.007951884	0.279902151	3.46E-17
Interferon_Receptor	0.447356591	0.497679544	1.112489576	1.28E-19
Interleukins	-0.04306784	-0.019413374	0.450762661	4.14E-13
Interleukins_Receptor	0.074911976	0.093326464	1.245815001	7.93E-13
NaturalKiller_Cell_Cytotoxicity	0.107220427	0.139171684	1.29799598	1.15E-22
TCRsignalingPathway	0.12608018	0.149229687	1.183609404	1.48E-17
TGFb_Family_Member	-0.079328228	-0.060743855	0.765728118	2.42E-10
TGFb_Family_Member_Receptor	0.110681235	0.101014205	0.912658812	0.005018149
TNF_Family_Members	-0.067819813	-0.030722486	0.453001626	4.61E-12
TNF_Family_Members_Receptors	0.129777052	0.171192354	1.31912654	7.56E-16
