# Supplementary material for: Crosstalk between RNA-Binding Proteins and Immune Microenvironment Revealed Two RBP Regulatory Patterns with Distinct Immunophenotypes in Periodontitis
Source: J Immunol Res. 2021 Jul 5;2021:5588429. doi: 10.1155/2021/5588429 (PMC8275429; doi:10.1155/2021/5588429)
Supplement: Supplementary Materials — Supplementary figures (FigureS1-S3) were uploaded entitled “supplementary figures.docx.” Supplementary tables (Table S1-S12) were uploaded entitled “Table S1: significantly dysregulated RBPs .txt.” “Table S2: results of univariate logistic regression.txt.” “Table S3: results of multivariate logistic regression.txt.” “Table S4: diversity of immunocytes between healthy and periodontitis samples.txt.” “Table S5: correlation analysis between immnuocytes and RBPs.txt.” “Table S6: diversity of immune pathways between healthy and periodontitis samples.txt.” “Table S7: Correlations between RBPs and immune pathways.txt.” “Table S8: diversity of HLA expression between healthy and periodontitis samples.txt.” “Table S9: correlation between RBPs and HLA expression.txt.” “Table S10: RBP regulatory subtypes.txt.” “Table S11: RBP regulatory subtype related genes.txt.” “Table S12: gene significance and module membership.txt,” respectively, with their filename indicating the contents of the tables. [file 5588429.f1.zip › 5588429.f1/Table S7. Correlations between RBPs and immune pathways..txt]

Table S7. Correlations between RBPs and immune pathways.
gene	pathway	cor	pvalue	fdr	abscor	logp
RNASE6	Antigen_Processing_and_Presentation	0.431	1.99E-15	4.43E-15	0.431	-47.68224117
RNASE6	Antimicrobials	0.45	7.35E-17	1.76E-16	0.45	-52.33274114
RNASE6	BCRSignalingPathway	0.822	2.10E-77	4.29E-75	0.822	-247.0441341
RNASE6	Chemokine_Receptors	0.629	1.29E-35	1.32E-34	0.629	-112.5442585
RNASE6	Chemokines	0.336	1.33E-09	2.05E-09	0.336	-28.86196952
RNASE6	Cytokine_Receptors	0.464	5.89E-18	1.54E-17	0.464	-55.84979698
RNASE6	Cytokines	0.353	1.60E-10	2.58E-10	0.353	-31.85035185
RNASE6	Interferon_Receptor	0.738	1.86E-54	1.05E-52	0.738	-172.6756347
RNASE6	Interferons	-0.163	0.003977749	0.004410113	0.163	-7.824968755
RNASE6	Interleukins	0.284	3.72E-07	5.09E-07	0.284	-20.90487391
RNASE6	Interleukins_Receptor	0.511	4.59E-22	1.52E-21	0.511	-69.15520051
RNASE6	NaturalKiller_Cell_Cytotoxicity	0.685	2.75E-44	5.91E-43	0.685	-140.2803533
RNASE6	TCRsignalingPathway	0.562	3.46E-27	1.83E-26	0.562	-85.49575743
RNASE6	TGFb_Family_Member	0.263	2.70E-06	3.57E-06	0.263	-18.09531042
RNASE6	TGFb_Family_Member_Receptor	-0.277	7.54E-07	1.01E-06	0.277	-19.91536834
RNASE6	TNF_Family_Members	0.499	6.21E-21	1.90E-20	0.499	-65.50910071
RNASE6	TNF_Family_Members_Receptors	0.569	6.13E-28	3.43E-27	0.569	-87.91495863
ESRP1	Antigen_Processing_and_Presentation	-0.491	3.36E-20	1.00E-19	0.491	-63.11623501
ESRP1	Antimicrobials	-0.613	2.57E-33	2.11E-32	0.613	-105.2258115
ESRP1	BCRSignalingPathway	-0.798	1.30E-69	1.32E-67	0.798	-222.1668861
ESRP1	Chemokine_Receptors	-0.728	1.58E-52	6.45E-51	0.728	-166.7295099
ESRP1	Chemokines	-0.481	2.26E-19	6.53E-19	0.481	-60.41023148
ESRP1	Cytokine_Receptors	-0.688	9.82E-45	2.23E-43	0.688	-141.6881072
ESRP1	Cytokines	-0.608	1.09E-32	8.38E-32	0.608	-103.2349019
ESRP1	Interferon_Receptor	-0.664	8.32E-41	1.26E-39	0.664	-129.2253818
ESRP1	Interleukins	-0.46	1.15E-17	2.98E-17	0.46	-54.89721896
ESRP1	Interleukins_Receptor	-0.524	3.16E-23	1.16E-22	0.524	-72.86793637
ESRP1	NaturalKiller_Cell_Cytotoxicity	-0.745	3.82E-56	2.60E-54	0.745	-178.0080364
ESRP1	TCRsignalingPathway	-0.552	3.65E-26	1.69E-25	0.552	-82.29052074
ESRP1	TGFb_Family_Member	-0.572	2.42E-28	1.37E-27	0.572	-89.23728838
ESRP1	TGFb_Family_Member_Receptor	0.439	5.18E-16	1.17E-15	0.439	-49.60646767
ESRP1	TNF_Family_Members	-0.378	5.61E-12	1.02E-11	0.378	-36.51655879
ESRP1	TNF_Family_Members_Receptors	-0.668	1.92E-41	3.10E-40	0.668	-131.2436387
SAP18	Antigen_Processing_and_Presentation	-0.468	2.79E-18	7.44E-18	0.468	-56.89942644
SAP18	Antimicrobials	-0.533	3.94E-24	1.54E-23	0.533	-75.77701227
SAP18	BCRSignalingPathway	-0.608	9.44E-33	7.40E-32	0.608	-103.4133758
SAP18	Chemokine_Receptors	-0.597	2.26E-31	1.56E-30	0.597	-99.01312303
SAP18	Chemokines	-0.379	5.10E-12	9.30E-12	0.379	-36.6464469
SAP18	Cytokine_Receptors	-0.597	2.54E-31	1.72E-30	0.597	-98.87193384
SAP18	Cytokines	-0.559	6.99E-27	3.52E-26	0.559	-84.55427275
SAP18	Interferon_Receptor	-0.497	9.52E-21	2.88E-20	0.497	-64.91414829
SAP18	Interferons	-0.243	1.46E-05	1.88E-05	0.243	-15.7011711
SAP18	Interleukins	-0.515	2.20E-22	7.62E-22	0.515	-70.15233264
SAP18	Interleukins_Receptor	-0.37	1.82E-11	3.16E-11	0.37	-34.87931764
SAP18	NaturalKiller_Cell_Cytotoxicity	-0.65	1.23E-38	1.52E-37	0.65	-122.3107103
SAP18	TCRsignalingPathway	-0.451	6.66E-17	1.62E-16	0.451	-52.45785257
SAP18	TGFb_Family_Member	-0.556	1.38E-26	6.70E-26	0.556	-83.62563508
SAP18	TGFb_Family_Member_Receptor	0.413	3.63E-14	7.44E-14	0.413	-43.6122499
SAP18	TNF_Family_Members	-0.231	4.01E-05	5.08E-05	0.231	-14.26466112
SAP18	TNF_Family_Members_Receptors	-0.539	9.57E-25	4.02E-24	0.539	-77.71767359
NIP7	Antigen_Processing_and_Presentation	-0.209	0.000209098	0.00024945	0.209	-11.96896206
NIP7	Antimicrobials	-0.36	6.60E-11	1.12E-10	0.36	-33.05411385
NIP7	BCRSignalingPathway	-0.592	1.11E-30	7.21E-30	0.592	-96.8081311
NIP7	Chemokine_Receptors	-0.449	8.74E-17	2.09E-16	0.449	-52.09024017
NIP7	Chemokines	-0.204	0.000296782	0.000349963	0.204	-11.48051189
NIP7	Cytokine_Receptors	-0.458	1.75E-17	4.46E-17	0.458	-54.31606161
NIP7	Cytokines	-0.356	1.07E-10	1.77E-10	0.356	-32.39717395
NIP7	Interferon_Receptor	-0.358	8.33E-11	1.40E-10	0.358	-32.73449142
NIP7	Interferons	0.249	9.01E-06	1.17E-05	0.249	-16.3875849
NIP7	Interleukins_Receptor	-0.314	1.56E-08	2.24E-08	0.314	-25.40891362
NIP7	NaturalKiller_Cell_Cytotoxicity	-0.44	4.32E-16	9.84E-16	0.44	-49.85176477
NIP7	TCRsignalingPathway	-0.352	1.82E-10	2.92E-10	0.352	-31.67285651
NIP7	TGFb_Family_Member	-0.422	8.46E-15	1.79E-14	0.422	-45.66784653
NIP7	TGFb_Family_Member_Receptor	0.223	7.22E-05	9.01E-05	0.223	-13.43885492
NIP7	TNF_Family_Members	-0.23	4.31E-05	5.45E-05	0.23	-14.16423771
NIP7	TNF_Family_Members_Receptors	-0.615	1.23E-33	1.07E-32	0.615	-106.2037905
APOBEC3G	Antigen_Processing_and_Presentation	0.539	9.91E-25	4.13E-24	0.539	-77.68147893
APOBEC3G	Antimicrobials	0.513	3.15E-22	1.08E-21	0.513	-69.64756043
APOBEC3G	BCRSignalingPathway	0.651	9.27E-39	1.18E-37	0.651	-122.6705545
APOBEC3G	Chemokine_Receptors	0.624	6.54E-35	6.51E-34	0.624	-110.2429613
APOBEC3G	Chemokines	0.469	2.35E-18	6.31E-18	0.469	-57.13762808
APOBEC3G	Cytokine_Receptors	0.429	2.41E-15	5.28E-15	0.429	-47.4288738
APOBEC3G	Cytokines	0.512	4.27E-22	1.44E-21	0.512	-69.23349183
APOBEC3G	Interferon_Receptor	0.69	4.10E-45	9.85E-44	0.69	-142.8647319
APOBEC3G	Interferons	0.205	0.000287649	0.000340177	0.205	-11.52142795
APOBEC3G	Interleukins	0.454	3.71E-17	9.28E-17	0.454	-53.25844337
APOBEC3G	Interleukins_Receptor	0.467	3.39E-18	8.99E-18	0.467	-56.62576314
APOBEC3G	NaturalKiller_Cell_Cytotoxicity	0.685	2.91E-44	5.95E-43	0.685	-140.2710443
APOBEC3G	TCRsignalingPathway	0.521	5.93E-23	2.14E-22	0.521	-71.98330575
APOBEC3G	TGFb_Family_Member	0.308	3.03E-08	4.35E-08	0.308	-24.45487607
APOBEC3G	TGFb_Family_Member_Receptor	-0.372	1.24E-11	2.19E-11	0.372	-35.41196214
APOBEC3G	TNF_Family_Members	0.516	1.54E-22	5.37E-22	0.516	-70.65648561
APOBEC3G	TNF_Family_Members_Receptors	0.45	7.12E-17	1.72E-16	0.45	-52.36850977
ARHGEF28	Antigen_Processing_and_Presentation	-0.41	5.26E-14	1.06E-13	0.41	-43.09681044
ARHGEF28	Antimicrobials	-0.51	6.88E-22	2.23E-21	0.51	-68.60533219
ARHGEF28	BCRSignalingPathway	-0.727	3.43E-52	1.27E-50	0.727	-165.7490815
ARHGEF28	Chemokine_Receptors	-0.664	8.79E-41	1.28E-39	0.664	-129.198217
ARHGEF28	Chemokines	-0.393	7.07E-13	1.33E-12	0.393	-39.44657444
ARHGEF28	Cytokine_Receptors	-0.595	4.95E-31	3.31E-30	0.595	-97.93057414
ARHGEF28	Cytokines	-0.6	1.22E-31	8.76E-31	0.6	-99.84874712
ARHGEF28	Interferon_Receptor	-0.685	3.33E-44	6.47E-43	0.685	-140.1494457
ARHGEF28	Interleukins	-0.422	8.10E-15	1.72E-14	0.422	-45.72355959
ARHGEF28	Interleukins_Receptor	-0.537	1.56E-24	6.32E-24	0.537	-77.06655774
ARHGEF28	NaturalKiller_Cell_Cytotoxicity	-0.651	8.15E-39	1.07E-37	0.651	-122.8096515
ARHGEF28	TCRsignalingPathway	-0.404	1.31E-13	2.56E-13	0.404	-41.83084869
ARHGEF28	TGFb_Family_Member	-0.479	3.41E-19	9.72E-19	0.479	-59.83628994
ARHGEF28	TGFb_Family_Member_Receptor	0.559	6.33E-27	3.23E-26	0.559	-84.67830209
ARHGEF28	TNF_Family_Members	-0.306	3.76E-08	5.36E-08	0.306	-24.15327978
ARHGEF28	TNF_Family_Members_Receptors	-0.708	1.56E-48	4.56E-47	0.708	-153.9423079
IREB2	Antigen_Processing_and_Presentation	-0.223	7.48E-05	9.31E-05	0.223	-13.39148019
IREB2	Antimicrobials	-0.405	1.23E-13	2.41E-13	0.405	-41.91411036
IREB2	BCRSignalingPathway	-0.434	1.22E-15	2.74E-15	0.434	-48.37625431
IREB2	Chemokine_Receptors	-0.508	9.63E-22	3.07E-21	0.508	-68.14254368
IREB2	Chemokines	-0.407	8.45E-14	1.68E-13	0.407	-42.43443516
IREB2	Cytokine_Receptors	-0.444	2.18E-16	5.03E-16	0.444	-50.82019449
IREB2	Cytokines	-0.54	6.91E-25	3.00E-24	0.54	-78.14087866
IREB2	Interferon_Receptor	-0.322	6.40E-09	9.35E-09	0.322	-26.67189975
IREB2	Interleukins	-0.206	0.000266997	0.000316671	0.206	-11.62472733
IREB2	Interleukins_Receptor	-0.412	3.98E-14	8.13E-14	0.412	-43.48422996
IREB2	NaturalKiller_Cell_Cytotoxicity	-0.388	1.50E-12	2.78E-12	0.388	-38.38635042
IREB2	TCRsignalingPathway	-0.223	7.58E-05	9.40E-05	0.223	-13.3767892
IREB2	TGFb_Family_Member	-0.489	4.53E-20	1.34E-19	0.489	-62.69590703
IREB2	TGFb_Family_Member_Receptor	0.354	1.32E-10	2.15E-10	0.354	-32.11248808
IREB2	TNF_Family_Members	-0.248	1.03E-05	1.34E-05	0.248	-16.19196008
IREB2	TNF_Family_Members_Receptors	-0.567	9.83E-28	5.35E-27	0.567	-87.27319699
SIDT1	Antigen_Processing_and_Presentation	0.348	3.11E-10	4.92E-10	0.348	-30.92043281
SIDT1	Antimicrobials	0.387	1.61E-12	2.98E-12	0.387	-38.29017614
SIDT1	BCRSignalingPathway	0.694	8.42E-46	2.15E-44	0.694	-145.0620798
SIDT1	Chemokine_Receptors	0.555	1.96E-26	9.39E-26	0.555	-83.13883148
SIDT1	Chemokines	0.283	4.00E-07	5.42E-07	0.283	-20.81566187
SIDT1	Cytokine_Receptors	0.411	4.69E-14	9.52E-14	0.411	-43.25602907
SIDT1	Cytokines	0.237	2.49E-05	3.16E-05	0.237	-14.94975701
SIDT1	Interferon_Receptor	0.607	1.34E-32	1.01E-31	0.607	-102.9600804
SIDT1	Interleukins	0.256	4.95E-06	6.48E-06	0.256	-17.23662735
SIDT1	Interleukins_Receptor	0.494	1.69E-20	5.06E-20	0.494	-64.09854128
SIDT1	NaturalKiller_Cell_Cytotoxicity	0.611	4.36E-33	3.49E-32	0.611	-104.4985298
SIDT1	TCRsignalingPathway	0.615	1.34E-33	1.14E-32	0.615	-106.1107065
SIDT1	TGFb_Family_Member	0.169	0.00275476	0.003087752	0.169	-8.339227175
SIDT1	TGFb_Family_Member_Receptor	-0.174	0.002132085	0.002409669	0.174	-8.696949254
SIDT1	TNF_Family_Members	0.525	2.30E-23	8.63E-23	0.525	-73.29569444
SIDT1	TNF_Family_Members_Receptors	0.454	3.85E-17	9.57E-17	0.454	-53.21421348
ENDOU	Antigen_Processing_and_Presentation	-0.253	6.43E-06	8.38E-06	0.253	-16.86418249
ENDOU	Antimicrobials	-0.447	1.21E-16	2.85E-16	0.447	-51.64217776
ENDOU	BCRSignalingPathway	-0.681	1.25E-43	2.33E-42	0.681	-138.3027991
ENDOU	Chemokine_Receptors	-0.678	4.40E-43	7.80E-42	0.678	-136.5572145
ENDOU	Chemokines	-0.409	6.09E-14	1.22E-13	0.409	-42.89242678
ENDOU	Cytokine_Receptors	-0.599	1.28E-31	9.03E-31	0.599	-99.80465639
ENDOU	Cytokines	-0.537	1.56E-24	6.32E-24	0.537	-77.06655774
ENDOU	Interferon_Receptor	-0.562	2.98E-27	1.60E-26	0.562	-85.6926471
ENDOU	Interleukins	-0.46	1.32E-17	3.39E-17	0.46	-54.71213317
ENDOU	Interleukins_Receptor	-0.427	3.44E-15	7.48E-15	0.427	-46.92681005
ENDOU	NaturalKiller_Cell_Cytotoxicity	-0.574	1.57E-28	9.05E-28	0.574	-89.83601745
ENDOU	TCRsignalingPathway	-0.47	1.81E-18	4.90E-18	0.47	-57.50173865
ENDOU	TGFb_Family_Member	-0.488	6.30E-20	1.85E-19	0.488	-62.22914417
ENDOU	TGFb_Family_Member_Receptor	0.219	0.000103595	0.000128081	0.219	-12.93065549
ENDOU	TNF_Family_Members	-0.508	9.22E-22	2.96E-21	0.508	-68.19361691
ENDOU	TNF_Family_Members_Receptors	-0.54	7.08E-25	3.04E-24	0.54	-78.12243956
SPATS2	Antigen_Processing_and_Presentation	0.328	3.21E-09	4.80E-09	0.328	-27.63311238
SPATS2	Antimicrobials	0.322	6.58E-09	9.59E-09	0.322	-26.63620913
SPATS2	BCRSignalingPathway	0.804	1.83E-71	2.49E-69	0.804	-227.8971391
SPATS2	Chemokine_Receptors	0.505	1.98E-21	6.20E-21	0.505	-67.12706653
SPATS2	Chemokines	0.171	0.002538558	0.002853256	0.171	-8.453175187
SPATS2	Cytokine_Receptors	0.43	2.31E-15	5.09E-15	0.43	-47.48243984
SPATS2	Cytokines	0.258	4.18E-06	5.48E-06	0.258	-17.4766602
SPATS2	Interferon_Receptor	0.726	5.20E-52	1.72E-50	0.726	-165.3099149
SPATS2	Interferons	-0.24	1.98E-05	2.52E-05	0.24	-15.27686892
SPATS2	Interleukins	0.242	1.67E-05	2.13E-05	0.242	-15.51616455
SPATS2	Interleukins_Receptor	0.376	7.12E-12	1.27E-11	0.376	-36.1912214
SPATS2	NaturalKiller_Cell_Cytotoxicity	0.583	1.25E-29	7.61E-29	0.583	-93.40736814
SPATS2	TCRsignalingPathway	0.404	1.33E-13	2.59E-13	0.404	-41.81101879
SPATS2	TGFb_Family_Member	0.275	8.91E-07	1.19E-06	0.275	-19.67892377
SPATS2	TGFb_Family_Member_Receptor	-0.306	3.66E-08	5.24E-08	0.306	-24.18464646
SPATS2	TNF_Family_Members	0.353	1.66E-10	2.68E-10	0.353	-31.79464351
SPATS2	TNF_Family_Members_Receptors	0.586	6.32E-30	3.91E-29	0.586	-94.36989552
ISG20	Antigen_Processing_and_Presentation	0.421	9.41E-15	1.98E-14	0.421	-45.52196512
ISG20	Antimicrobials	0.485	1.15E-19	3.35E-19	0.485	-61.37113024
ISG20	BCRSignalingPathway	0.835	9.13E-82	3.72E-79	0.835	-260.5354776
ISG20	Chemokine_Receptors	0.616	8.45E-34	7.50E-33	0.616	-106.7173586
ISG20	Chemokines	0.314	1.53E-08	2.22E-08	0.314	-25.42767484
ISG20	Cytokine_Receptors	0.544	2.65E-25	1.19E-24	0.544	-79.48015472
ISG20	Cytokines	0.448	1.06E-16	2.52E-16	0.448	-51.81616232
ISG20	Interferon_Receptor	0.726	5.50E-52	1.72E-50	0.726	-165.3099149
ISG20	Interleukins	0.305	4.12E-08	5.85E-08	0.305	-24.0266592
ISG20	Interleukins_Receptor	0.526	1.69E-23	6.39E-23	0.526	-73.72770513
ISG20	NaturalKiller_Cell_Cytotoxicity	0.675	1.41E-42	2.40E-41	0.675	-134.9383363
ISG20	TCRsignalingPathway	0.477	4.90E-19	1.37E-18	0.477	-59.34233728
ISG20	TGFb_Family_Member	0.386	1.80E-12	3.31E-12	0.386	-38.13600825
ISG20	TGFb_Family_Member_Receptor	-0.471	1.74E-18	4.73E-18	0.471	-57.55409019
ISG20	TNF_Family_Members	0.347	3.25E-10	5.12E-10	0.347	-30.8626011
ISG20	TNF_Family_Members_Receptors	0.737	2.05E-54	1.05E-52	0.737	-172.6756347
ESF1	Antigen_Processing_and_Presentation	-0.359	7.78E-11	1.31E-10	0.359	-32.82796324
ESF1	Antimicrobials	-0.479	3.55E-19	1.01E-18	0.479	-59.7849531
ESF1	BCRSignalingPathway	-0.554	2.64E-26	1.24E-25	0.554	-82.73981946
ESF1	Chemokine_Receptors	-0.507	1.29E-21	4.07E-21	0.507	-67.73535842
ESF1	Chemokines	-0.37	1.80E-11	3.14E-11	0.37	-34.89004286
ESF1	Cytokine_Receptors	-0.497	8.97E-21	2.73E-20	0.497	-64.9892816
ESF1	Cytokines	-0.547	1.27E-25	5.74E-25	0.547	-80.52657513
ESF1	Interferon_Receptor	-0.332	2.07E-09	3.13E-09	0.332	-28.25275074
ESF1	Interleukins	-0.212	0.000168679	0.000204345	0.212	-12.25670421
ESF1	Interleukins_Receptor	-0.365	3.16E-11	5.44E-11	0.365	-34.09712535
ESF1	NaturalKiller_Cell_Cytotoxicity	-0.518	1.09E-22	3.83E-22	0.518	-71.14666231
ESF1	TCRsignalingPathway	-0.333	1.93E-09	2.93E-09	0.333	-28.34540236
ESF1	TGFb_Family_Member	-0.557	1.19E-26	5.86E-26	0.557	-83.81934402
ESF1	TGFb_Family_Member_Receptor	0.458	1.93E-17	4.85E-17	0.458	-54.19434647
ESF1	TNF_Family_Members	-0.184	0.001104617	0.001269531	0.184	-9.621488186
ESF1	TNF_Family_Members_Receptors	-0.644	1.19E-37	1.32E-36	0.644	-119.1927934
PUS7	Antigen_Processing_and_Presentation	-0.503	2.50E-21	7.79E-21	0.503	-66.79912996
PUS7	Antimicrobials	-0.554	2.53E-26	1.20E-25	0.554	-82.78384187
PUS7	BCRSignalingPathway	-0.646	4.87E-38	5.85E-37	0.646	-120.3641195
PUS7	Chemokine_Receptors	-0.557	1.16E-26	5.78E-26	0.557	-83.83846597
PUS7	Chemokines	-0.326	4.08E-09	6.05E-09	0.326	-27.30014543
PUS7	Cytokine_Receptors	-0.589	2.21E-30	1.38E-29	0.589	-95.86649064
PUS7	Cytokines	-0.473	1.18E-18	3.23E-18	0.473	-58.10387439
PUS7	Interferon_Receptor	-0.42	1.15E-14	2.42E-14	0.42	-45.23430835
PUS7	Interleukins	-0.354	1.42E-10	2.30E-10	0.354	-32.0148985
PUS7	Interleukins_Receptor	-0.372	1.25E-11	2.20E-11	0.372	-35.40095794
PUS7	NaturalKiller_Cell_Cytotoxicity	-0.668	1.98E-41	3.10E-40	0.668	-131.2436387
PUS7	TCRsignalingPathway	-0.51	5.72E-22	1.87E-21	0.51	-68.85961131
PUS7	TGFb_Family_Member	-0.512	4.44E-22	1.48E-21	0.512	-69.19130143
PUS7	TGFb_Family_Member_Receptor	0.382	3.07E-12	5.62E-12	0.382	-37.37160394
PUS7	TNF_Family_Members	-0.229	4.80E-05	6.04E-05	0.229	-14.01441195
PUS7	TNF_Family_Members_Receptors	-0.568	7.44E-28	4.10E-27	0.568	-87.65533591
WARS	Antigen_Processing_and_Presentation	0.528	1.08E-23	4.14E-23	0.528	-74.35489612
WARS	Antimicrobials	0.62	2.29E-34	2.17E-33	0.62	-108.5055613
WARS	BCRSignalingPathway	0.749	6.52E-57	5.32E-55	0.749	-180.2947911
WARS	Chemokine_Receptors	0.635	2.18E-36	2.28E-35	0.635	-115.0758225
WARS	Chemokines	0.476	5.98E-19	1.66E-18	0.476	-59.06414666
WARS	Cytokine_Receptors	0.538	1.06E-24	4.37E-24	0.538	-77.59921627
WARS	Cytokines	0.451	6.20E-17	1.51E-16	0.451	-52.55238646
WARS	Interferon_Receptor	0.607	1.47E-32	1.09E-31	0.607	-102.8504352
WARS	Interleukins	0.357	1.01E-10	1.68E-10	0.357	-32.46947407
WARS	Interleukins_Receptor	0.578	5.26E-29	3.16E-28	0.578	-91.35463479
WARS	NaturalKiller_Cell_Cytotoxicity	0.697	1.93E-46	5.25E-45	0.697	-147.0936168
WARS	TCRsignalingPathway	0.551	4.80E-26	2.20E-25	0.551	-81.91014174
WARS	TGFb_Family_Member	0.34	8.09E-10	1.26E-09	0.34	-29.56331126
WARS	TGFb_Family_Member_Receptor	-0.359	7.13E-11	1.21E-10	0.359	-32.9477077
WARS	TNF_Family_Members	0.452	4.84E-17	1.19E-16	0.452	-52.89994449
WARS	TNF_Family_Members_Receptors	0.646	5.47E-38	6.37E-37	0.646	-120.2389994
GNL2	Antigen_Processing_and_Presentation	-0.345	4.37E-10	6.86E-10	0.345	-30.44136225
GNL2	Antimicrobials	-0.366	3.01E-11	5.21E-11	0.366	-34.15981033
GNL2	BCRSignalingPathway	-0.394	5.60E-13	1.06E-12	0.394	-39.77490938
GNL2	Chemokine_Receptors	-0.365	3.48E-11	5.97E-11	0.365	-33.963548
GNL2	Chemokines	-0.209	0.000208098	0.000248986	0.209	-11.97164924
GNL2	Cytokine_Receptors	-0.427	3.54E-15	7.64E-15	0.427	-46.89455842
GNL2	Cytokines	-0.277	7.24E-07	9.75E-07	0.277	-19.96737295
GNL2	Interferon_Receptor	-0.289	2.34E-07	3.22E-07	0.289	-21.56541891
GNL2	Interleukins	-0.192	0.000677857	0.000785698	0.192	-10.31373791
GNL2	Interleukins_Receptor	-0.165	0.003501755	0.003908219	0.165	-7.9992728
GNL2	NaturalKiller_Cell_Cytotoxicity	-0.442	2.74E-16	6.27E-16	0.442	-50.50229458
GNL2	TCRsignalingPathway	-0.37	1.61E-11	2.82E-11	0.37	-35.04565478
GNL2	TGFb_Family_Member	-0.389	1.26E-12	2.34E-12	0.389	-38.63641536
GNL2	TNF_Family_Members_Receptors	-0.333	1.80E-09	2.75E-09	0.333	-28.43841688
AZGP1	Antigen_Processing_and_Presentation	-0.212	0.000172375	0.000208073	0.212	-12.23061974
AZGP1	Antimicrobials	-0.361	5.32E-11	9.09E-11	0.361	-33.35705466
AZGP1	BCRSignalingPathway	-0.429	2.71E-15	5.91E-15	0.429	-47.26556919
AZGP1	Chemokine_Receptors	-0.356	1.05E-10	1.74E-10	0.356	-32.42257382
AZGP1	Chemokines	-0.303	5.37E-08	7.61E-08	0.303	-23.64770545
AZGP1	Cytokine_Receptors	-0.283	3.93E-07	5.34E-07	0.283	-20.83701177
AZGP1	Cytokines	-0.355	1.26E-10	2.06E-10	0.355	-32.17683339
AZGP1	Interferon_Receptor	-0.402	1.80E-13	3.46E-13	0.402	-41.39394577
AZGP1	Interleukins	-0.343	5.36E-10	8.38E-10	0.343	-30.15159235
AZGP1	Interleukins_Receptor	-0.267	1.80E-06	2.39E-06	0.267	-18.67597241
AZGP1	NaturalKiller_Cell_Cytotoxicity	-0.413	3.48E-14	7.17E-14	0.413	-43.66483625
AZGP1	TCRsignalingPathway	-0.348	2.92E-10	4.64E-10	0.348	-31.00537165
AZGP1	TGFb_Family_Member	-0.213	0.000152562	0.000186364	0.213	-12.38959103
AZGP1	TGFb_Family_Member_Receptor	0.206	0.000260483	0.000309846	0.206	-11.65616049
AZGP1	TNF_Family_Members	-0.281	4.93E-07	6.66E-07	0.281	-20.51878329
AZGP1	TNF_Family_Members_Receptors	-0.331	2.21E-09	3.32E-09	0.331	-28.16532551
ZC3H12D	Antigen_Processing_and_Presentation	0.216	0.000122981	0.00015159	0.216	-12.68753817
ZC3H12D	Antimicrobials	0.296	1.11E-07	1.54E-07	0.296	-22.62595881
ZC3H12D	BCRSignalingPathway	0.623	9.22E-35	8.96E-34	0.623	-109.7823339
ZC3H12D	Chemokine_Receptors	0.543	3.41E-25	1.51E-24	0.543	-79.13017217
ZC3H12D	Chemokines	0.296	1.09E-07	1.53E-07	0.296	-22.64083735
ZC3H12D	Cytokine_Receptors	0.356	1.07E-10	1.77E-10	0.356	-32.39717395
ZC3H12D	Cytokines	0.227	5.64E-05	7.06E-05	0.227	-13.7909724
ZC3H12D	Interferon_Receptor	0.618	5.27E-34	4.78E-33	0.618	-107.3666066
ZC3H12D	Interferons	-0.213	0.000156686	0.00019083	0.213	-12.35542621
ZC3H12D	Interleukins	0.182	0.00126182	0.00144208	0.182	-9.437633084
ZC3H12D	Interleukins_Receptor	0.479	3.68E-19	1.03E-18	0.479	-59.7461851
ZC3H12D	NaturalKiller_Cell_Cytotoxicity	0.511	5.00E-22	1.64E-21	0.511	-69.04298199
ZC3H12D	TCRsignalingPathway	0.54	8.15E-25	3.47E-24	0.54	-77.93308879
ZC3H12D	TNF_Family_Members	0.561	3.79E-27	1.98E-26	0.561	-85.3846679
ZC3H12D	TNF_Family_Members_Receptors	0.406	9.54E-14	1.88E-13	0.406	-42.27375807
EIF4E	Antigen_Processing_and_Presentation	-0.284	3.75E-07	5.12E-07	0.284	-20.89807902
EIF4E	Antimicrobials	-0.52	7.24E-23	2.59E-22	0.52	-71.7088895
EIF4E	BCRSignalingPathway	-0.613	2.58E-33	2.11E-32	0.613	-105.2258115
EIF4E	Chemokine_Receptors	-0.535	2.33E-24	9.31E-24	0.535	-76.50818008
EIF4E	Chemokines	-0.331	2.22E-09	3.33E-09	0.331	-28.16086682
EIF4E	Cytokine_Receptors	-0.653	4.18E-39	5.68E-38	0.653	-123.7272556
EIF4E	Cytokines	-0.519	8.08E-23	2.87E-22	0.519	-71.56366127
EIF4E	Interferon_Receptor	-0.326	4.22E-09	6.24E-09	0.326	-27.25480441
EIF4E	Interferons	0.155	0.006255277	0.006860626	0.155	-7.187443979
EIF4E	Interleukins	-0.229	4.86E-05	6.11E-05	0.229	-13.99941777
EIF4E	Interleukins_Receptor	-0.415	2.46E-14	5.10E-14	0.415	-44.15620872
EIF4E	NaturalKiller_Cell_Cytotoxicity	-0.528	1.12E-23	4.26E-23	0.528	-74.31286808
EIF4E	TCRsignalingPathway	-0.389	1.19E-12	2.24E-12	0.389	-38.70205659
EIF4E	TGFb_Family_Member	-0.638	8.37E-37	8.99E-36	0.638	-116.4211451
EIF4E	TGFb_Family_Member_Receptor	0.358	8.77E-11	1.47E-10	0.358	-32.66637786
EIF4E	TNF_Family_Members_Receptors	-0.729	1.03E-52	4.69E-51	0.729	-167.1887333
ERN1	Antigen_Processing_and_Presentation	0.203	0.000332919	0.000391443	0.203	-11.31890841
ERN1	Antimicrobials	0.243	1.46E-05	1.88E-05	0.243	-15.70039284
ERN1	BCRSignalingPathway	0.644	1.02E-37	1.16E-36	0.644	-119.3800817
ERN1	Chemokine_Receptors	0.406	9.36E-14	1.85E-13	0.406	-42.29441278
ERN1	Cytokine_Receptors	0.374	1.07E-11	1.89E-11	0.374	-35.62110846
ERN1	Cytokines	0.211	0.000186737	0.000224746	0.211	-12.11941872
ERN1	Interferon_Receptor	0.575	1.09E-28	6.43E-28	0.575	-90.32914612
ERN1	Interferons	-0.301	6.72E-08	9.49E-08	0.301	-23.3289603
ERN1	Interleukins	0.158	0.00534465	0.005877674	0.158	-7.410538885
ERN1	Interleukins_Receptor	0.328	3.48E-09	5.18E-09	0.328	-27.52341706
ERN1	NaturalKiller_Cell_Cytotoxicity	0.439	5.00E-16	1.13E-15	0.439	-49.64976149
ERN1	TCRsignalingPathway	0.297	1.01E-07	1.42E-07	0.297	-22.75104073
ERN1	TGFb_Family_Member	0.212	0.000168785	0.000204345	0.212	-12.25670421
ERN1	TGFb_Family_Member_Receptor	-0.185	0.001047846	0.001207687	0.185	-9.693537383
ERN1	TNF_Family_Members	0.292	1.57E-07	2.17E-07	0.292	-22.13339898
ERN1	TNF_Family_Members_Receptors	0.534	3.29E-24	1.30E-23	0.534	-76.02342269
INTS7	Antigen_Processing_and_Presentation	-0.501	3.94E-21	1.22E-20	0.501	-66.15528896
INTS7	Antimicrobials	-0.54	6.90E-25	3.00E-24	0.54	-78.14087866
INTS7	BCRSignalingPathway	-0.445	1.72E-16	4.02E-16	0.445	-51.14394968
INTS7	Chemokine_Receptors	-0.453	3.97E-17	9.81E-17	0.453	-53.17921419
INTS7	Chemokines	-0.338	1.04E-09	1.62E-09	0.338	-29.20450218
INTS7	Cytokine_Receptors	-0.594	6.76E-31	4.45E-30	0.594	-97.50505943
INTS7	Cytokines	-0.513	3.35E-22	1.14E-21	0.513	-69.57423257
INTS7	Interferon_Receptor	-0.261	3.12E-06	4.12E-06	0.261	-17.88749486
INTS7	Interferons	-0.325	4.45E-09	6.56E-09	0.325	-27.18331746
INTS7	Interleukins	-0.425	4.72E-15	1.01E-14	0.425	-46.48782394
INTS7	Interleukins_Receptor	-0.286	2.91E-07	4.00E-07	0.286	-21.2529829
INTS7	NaturalKiller_Cell_Cytotoxicity	-0.575	1.10E-28	6.43E-28	0.575	-90.32914612
INTS7	TCRsignalingPathway	-0.404	1.37E-13	2.64E-13	0.404	-41.78260954
INTS7	TGFb_Family_Member	-0.619	3.61E-34	3.35E-33	0.619	-107.8798598
INTS7	TGFb_Family_Member_Receptor	0.392	8.18E-13	1.54E-12	0.392	-39.24155749
INTS7	TNF_Family_Members_Receptors	-0.458	1.77E-17	4.48E-17	0.458	-54.30975717
TPR	Antigen_Processing_and_Presentation	-0.466	3.95E-18	1.04E-17	0.466	-56.41596115
TPR	Antimicrobials	-0.474	9.01E-19	2.48E-18	0.474	-58.4821319
TPR	BCRSignalingPathway	-0.401	1.99E-13	3.81E-13	0.401	-41.25354367
TPR	Chemokine_Receptors	-0.409	6.48E-14	1.30E-13	0.409	-42.81180094
TPR	Chemokines	-0.396	4.48E-13	8.54E-13	0.396	-40.09166291
TPR	Cytokine_Receptors	-0.35	2.34E-10	3.74E-10	0.35	-31.316881
TPR	Cytokines	-0.529	1.04E-23	4.05E-23	0.529	-74.38638247
TPR	Interferon_Receptor	-0.253	6.53E-06	8.48E-06	0.253	-16.84745846
TPR	Interferons	-0.295	1.20E-07	1.67E-07	0.295	-22.51509013
TPR	Interleukins	-0.324	5.41E-09	7.95E-09	0.324	-26.9069105
TPR	Interleukins_Receptor	-0.374	9.64E-12	1.72E-11	0.374	-35.76155972
TPR	NaturalKiller_Cell_Cytotoxicity	-0.481	2.28E-19	6.54E-19	0.481	-60.40684109
TPR	TCRsignalingPathway	-0.259	3.94E-06	5.19E-06	0.259	-17.55577938
TPR	TGFb_Family_Member	-0.523	3.61E-23	1.32E-22	0.523	-72.68643299
TPR	TGFb_Family_Member_Receptor	0.525	2.33E-23	8.66E-23	0.525	-73.29019723
TPR	TNF_Family_Members_Receptors	-0.416	2.24E-14	4.66E-14	0.416	-44.28595985
RRBP1	Antigen_Processing_and_Presentation	0.378	5.90E-12	1.06E-11	0.378	-36.45606625
RRBP1	Antimicrobials	0.448	1.09E-16	2.57E-16	0.448	-51.78761794
RRBP1	BCRSignalingPathway	0.662	1.75E-40	2.46E-39	0.662	-128.2554637
RRBP1	Chemokine_Receptors	0.444	2.04E-16	4.73E-16	0.444	-50.90998572
RRBP1	Chemokines	0.187	0.000910701	0.001052595	0.187	-9.891833845
RRBP1	Cytokine_Receptors	0.591	1.44E-30	9.21E-30	0.591	-96.45439064
RRBP1	Cytokines	0.378	5.86E-12	1.06E-11	0.378	-36.45913975
RRBP1	Interferon_Receptor	0.46	1.30E-17	3.37E-17	0.46	-54.72069643
RRBP1	Interleukins	0.335	1.47E-09	2.26E-09	0.335	-28.72370521
RRBP1	Interleukins_Receptor	0.333	1.86E-09	2.83E-09	0.333	-28.39493801
RRBP1	NaturalKiller_Cell_Cytotoxicity	0.561	4.25E-27	2.20E-26	0.561	-85.23437585
RRBP1	TCRsignalingPathway	0.43	2.09E-15	4.64E-15	0.43	-47.61622206
RRBP1	TGFb_Family_Member	0.424	5.52E-15	1.18E-14	0.424	-46.26811101
RRBP1	TGFb_Family_Member_Receptor	-0.349	2.65E-10	4.22E-10	0.349	-31.14154694
RRBP1	TNF_Family_Members_Receptors	0.605	2.20E-32	1.60E-31	0.605	-102.3005248
DDX6	Antimicrobials	0.171	0.002458047	0.002770396	0.171	-8.495692298
DDX6	BCRSignalingPathway	0.335	1.39E-09	2.14E-09	0.335	-28.80209438
DDX6	Chemokine_Receptors	0.165	0.003505903	0.003908219	0.165	-7.9992728
DDX6	Cytokine_Receptors	0.2	0.000406793	0.000475563	0.2	-11.03807607
DDX6	Interferon_Receptor	0.322	6.70E-09	9.73E-09	0.322	-26.61497244
DDX6	Interferons	-0.268	1.74E-06	2.32E-06	0.268	-18.71583866
DDX6	NaturalKiller_Cell_Cytotoxicity	0.175	0.001979877	0.002243861	0.175	-8.799801255
DDX6	TCRsignalingPathway	0.158	0.005332043	0.005877674	0.158	-7.410538885
DDX6	TNF_Family_Members_Receptors	0.295	1.17E-07	1.63E-07	0.295	-22.54917072
SF1	Antigen_Processing_and_Presentation	-0.197	0.000476255	0.000553595	0.197	-10.81888026
SF1	Antimicrobials	-0.184	0.001134087	0.00129974	0.184	-9.587561514
SF1	BCRSignalingPathway	-0.209	0.000206616	0.000247939	0.209	-11.97772829
SF1	Chemokine_Receptors	-0.165	0.003536924	0.003932058	0.165	-7.990499805
SF1	Chemokines	-0.201	0.000358628	0.00042046	0.201	-11.2157438
SF1	Cytokines	-0.182	0.001273648	0.001451532	0.182	-9.42820791
SF1	Interferon_Receptor	-0.162	0.004211638	0.004656771	0.162	-7.746454345
SF1	Interleukins_Receptor	-0.215	0.000131741	0.000161899	0.215	-12.59261705
SF1	NaturalKiller_Cell_Cytotoxicity	-0.182	0.001292812	0.001469268	0.182	-9.410686469
SF1	TGFb_Family_Member_Receptor	0.198	0.000456162	0.000531754	0.198	-10.8769526
SF1	TNF_Family_Members_Receptors	-0.214	0.000146654	0.000179684	0.214	-12.44225365
