# Supplementary material for: Crosstalk between RNA-Binding Proteins and Immune Microenvironment Revealed Two RBP Regulatory Patterns with Distinct Immunophenotypes in Periodontitis
Source: J Immunol Res. 2021 Jul 5;2021:5588429. doi: 10.1155/2021/5588429 (PMC8275429; doi:10.1155/2021/5588429)
Supplement: Supplementary Materials — Supplementary figures (FigureS1-S3) were uploaded entitled “supplementary figures.docx.” Supplementary tables (Table S1-S12) were uploaded entitled “Table S1: significantly dysregulated RBPs .txt.” “Table S2: results of univariate logistic regression.txt.” “Table S3: results of multivariate logistic regression.txt.” “Table S4: diversity of immunocytes between healthy and periodontitis samples.txt.” “Table S5: correlation analysis between immnuocytes and RBPs.txt.” “Table S6: diversity of immune pathways between healthy and periodontitis samples.txt.” “Table S7: Correlations between RBPs and immune pathways.txt.” “Table S8: diversity of HLA expression between healthy and periodontitis samples.txt.” “Table S9: correlation between RBPs and HLA expression.txt.” “Table S10: RBP regulatory subtypes.txt.” “Table S11: RBP regulatory subtype related genes.txt.” “Table S12: gene significance and module membership.txt,” respectively, with their filename indicating the contents of the tables. [file 5588429.f1.zip › 5588429.f1/Table S9. Correlation between RBPs and HLA expression..txt]

Table S9. Correlation between RBPs and HLA expression.
gene	pathway	cor	pvalue	fdr	abscor	logp
RNASE6	HLA-E	0.428	3.29E-15	8.72E-15	0.428	-46.7051733
RNASE6	HLA-C	0.708	1.82E-48	5.45E-47	0.708	-153.6841861
RNASE6	HLA-J	0.169	0.002889092	0.00364938	0.169	-8.098133025
RNASE6	HLA-DQB2	-0.274	9.54E-07	1.53E-06	0.274	-19.31640148
RNASE6	HLA-A	0.486	8.90E-20	3.59E-19	0.486	-61.27283973
RNASE6	HLA-DMA	0.771	2.70E-62	2.59E-60	0.771	-197.9401238
RNASE6	HLA-DOB	0.805	9.06E-72	2.17E-69	0.805	-228.0924837
RNASE6	HLA-DRB1	0.5	5.23E-21	2.33E-20	0.5	-65.2209219
RNASE6	HLA-B	0.497	1.06E-20	4.60E-20	0.497	-64.23745485
RNASE6	HLA-DPB1	0.245	1.32E-05	1.99E-05	0.245	-15.6144004
RNASE6	HLA-DRA	0.607	1.36E-32	1.77E-31	0.607	-102.1567494
RNASE6	HLA-DRB6	0.257	4.69E-06	7.27E-06	0.257	-17.07020831
RNASE6	HLA-F	0.469	2.42E-18	8.20E-18	0.469	-56.759912
RNASE6	HLA-G	0.386	1.99E-12	4.42E-12	0.386	-37.71765778
RNASE6	HLA-DMB	0.665	5.41E-41	1.18E-39	0.665	-129.3170519
RNASE6	HLA-DPA1	0.627	3.05E-35	4.58E-34	0.627	-110.751637
ESRP1	HLA-E	-0.515	2.24E-22	1.13E-21	0.515	-69.58465039
ESRP1	HLA-C	-0.747	1.91E-56	1.02E-54	0.747	-179.3597242
ESRP1	HLA-J	-0.393	6.99E-13	1.58E-12	0.393	-39.20135058
ESRP1	HLA-DQB2	0.345	4.43E-10	8.74E-10	0.345	-30.09105101
ESRP1	HLA-DQA1	-0.242	1.69E-05	2.52E-05	0.242	-15.27719791
ESRP1	HLA-A	-0.557	1.09E-26	7.46E-26	0.557	-83.47082164
ESRP1	HLA-DMA	-0.745	3.49E-56	1.67E-54	0.745	-178.6416103
ESRP1	HLA-DOB	-0.78	1.10E-64	1.32E-62	0.78	-205.5622765
ESRP1	HLA-DRB1	-0.594	5.63E-31	6.28E-30	0.594	-97.00625901
ESRP1	HLA-B	-0.563	2.74E-27	2.00E-26	0.563	-85.36994189
ESRP1	HLA-DOA	-0.283	4.23E-07	6.95E-07	0.283	-20.45738886
ESRP1	HLA-DPB1	-0.302	6.14E-08	1.06E-07	0.302	-23.16999844
ESRP1	HLA-DRA	-0.467	3.25E-18	1.08E-17	0.467	-56.36587272
ESRP1	HLA-DRB6	-0.448	1.13E-16	3.41E-16	0.448	-51.3819073
ESRP1	HLA-F	-0.584	1.01E-29	9.19E-29	0.584	-93.13651173
ESRP1	HLA-G	-0.563	2.75E-27	2.00E-26	0.563	-85.36994189
ESRP1	HLA-DMB	-0.555	2.01E-26	1.30E-25	0.555	-82.66743214
ESRP1	HLA-DPA1	-0.543	4.00E-25	2.31E-24	0.543	-78.51797723
SAP18	HLA-E	-0.476	6.01E-19	2.20E-18	0.476	-58.65545841
SAP18	HLA-DPB2	-0.19	0.000787759	0.001044543	0.19	-9.902912808
SAP18	HLA-C	-0.564	2.04E-27	1.58E-26	0.564	-85.71136114
SAP18	HLA-J	-0.431	1.98E-15	5.36E-15	0.431	-47.40767375
SAP18	HLA-DQB2	0.197	0.000493586	0.00066927	0.197	-10.54512504
SAP18	HLA-A	-0.404	1.41E-13	3.31E-13	0.404	-41.45829641
SAP18	HLA-DMA	-0.514	2.42E-22	1.21E-21	0.514	-69.48461086
SAP18	HLA-DOB	-0.612	2.86E-33	3.81E-32	0.612	-104.3723912
SAP18	HLA-DRB1	-0.314	1.68E-08	2.97E-08	0.314	-25.00716668
SAP18	HLA-B	-0.43	2.28E-15	6.11E-15	0.43	-47.2185623
SAP18	HLA-DOA	-0.441	3.26E-16	9.43E-16	0.441	-49.91417748
SAP18	HLA-DPB1	-0.256	5.11E-06	7.86E-06	0.256	-16.95783575
SAP18	HLA-DRA	-0.345	4.16E-10	8.25E-10	0.345	-30.17547941
SAP18	HLA-DRB6	-0.35	2.29E-10	4.61E-10	0.35	-31.01470373
SAP18	HLA-F	-0.452	5.18E-17	1.59E-16	0.452	-52.48620308
SAP18	HLA-G	-0.493	1.98E-20	8.32E-20	0.493	-63.38179435
SAP18	HLA-DMB	-0.445	1.83E-16	5.45E-16	0.445	-50.70455415
SAP18	HLA-DPA1	-0.349	2.58E-10	5.16E-10	0.349	-30.85288825
NIP7	HLA-E	-0.443	2.69E-16	7.81E-16	0.443	-50.18500614
NIP7	HLA-C	-0.543	3.80E-25	2.22E-24	0.543	-78.57335807
NIP7	HLA-J	-0.298	8.93E-08	1.53E-07	0.298	-22.63865404
NIP7	HLA-DQB2	0.243	1.50E-05	2.24E-05	0.243	-15.44452576
NIP7	HLA-A	-0.492	2.85E-20	1.18E-19	0.492	-62.87642767
NIP7	HLA-DMA	-0.589	2.43E-30	2.43E-29	0.589	-95.05624201
NIP7	HLA-DOB	-0.555	1.76E-26	1.17E-25	0.555	-82.81845047
NIP7	HLA-DRB1	-0.443	2.35E-16	6.91E-16	0.443	-50.36297041
NIP7	HLA-B	-0.485	1.04E-19	4.17E-19	0.485	-61.05552117
NIP7	HLA-DPB1	-0.187	0.000924829	0.001222914	0.187	-9.675461185
NIP7	HLA-DRA	-0.421	9.60E-15	2.44E-14	0.421	-45.22156473
NIP7	HLA-DRB6	-0.227	5.43E-05	7.95E-05	0.227	-13.61908196
NIP7	HLA-F	-0.465	4.85E-18	1.60E-17	0.465	-55.79821347
NIP7	HLA-G	-0.377	6.26E-12	1.37E-11	0.377	-36.0914708
NIP7	HLA-DMB	-0.469	2.34E-18	7.95E-18	0.469	-56.80325367
NIP7	HLA-DPA1	-0.498	7.81E-21	3.41E-20	0.498	-64.67044627
APOBEC3G	HLA-E	0.387	1.52E-12	3.40E-12	0.387	-38.09574903
APOBEC3G	HLA-C	0.57	3.79E-28	3.19E-27	0.57	-88.0181853
APOBEC3G	HLA-DQB2	-0.226	6.14E-05	8.90E-05	0.226	-13.45508085
APOBEC3G	HLA-DQA1	0.16	0.004615027	0.0057538	0.16	-7.441269201
APOBEC3G	HLA-A	0.382	3.18E-12	7.01E-12	0.382	-37.05456907
APOBEC3G	HLA-DMA	0.686	2.25E-44	5.68E-43	0.686	-140.3361682
APOBEC3G	HLA-DOB	0.748	9.40E-57	5.64E-55	0.748	-180.2103033
APOBEC3G	HLA-DRB1	0.48	3.05E-19	1.16E-18	0.48	-59.57779062
APOBEC3G	HLA-B	0.353	1.60E-10	3.25E-10	0.353	-31.51892401
APOBEC3G	HLA-DOA	0.33	2.63E-09	4.88E-09	0.33	-27.61155384
APOBEC3G	HLA-DPB1	0.334	1.63E-09	3.07E-09	0.334	-28.2770369
APOBEC3G	HLA-DRA	0.475	7.63E-19	2.78E-18	0.475	-58.32171535
APOBEC3G	HLA-DRB6	0.4	2.43E-13	5.62E-13	0.4	-40.69503221
APOBEC3G	HLA-F	0.391	8.81E-13	1.99E-12	0.391	-38.87328238
APOBEC3G	HLA-G	0.376	7.09E-12	1.53E-11	0.376	-35.92504031
APOBEC3G	HLA-DMB	0.722	3.36E-51	1.15E-49	0.722	-162.5705196
APOBEC3G	HLA-DPA1	0.479	3.43E-19	1.30E-18	0.479	-59.41850575
ARHGEF28	HLA-E	-0.333	1.82E-09	3.40E-09	0.333	-28.12972223
ARHGEF28	HLA-C	-0.586	5.15E-30	4.85E-29	0.586	-94.05902382
ARHGEF28	HLA-J	-0.176	0.001854912	0.002380635	0.176	-8.714437706
ARHGEF28	HLA-DQB2	0.377	6.37E-12	1.38E-11	0.377	-36.07230979
ARHGEF28	HLA-DQA1	-0.227	5.53E-05	8.07E-05	0.227	-13.59747056
ARHGEF28	HLA-A	-0.343	5.33E-10	1.04E-09	0.343	-29.83972094
ARHGEF28	HLA-DMA	-0.598	1.94E-31	2.27E-30	0.598	-98.47227081
ARHGEF28	HLA-DOB	-0.743	1.08E-55	4.71E-54	0.743	-177.1472967
ARHGEF28	HLA-DRB1	-0.413	3.31E-14	8.16E-14	0.413	-43.47923252
ARHGEF28	HLA-B	-0.425	5.11E-15	1.33E-14	0.425	-46.09329299
ARHGEF28	HLA-DOA	-0.198	0.000457605	0.000624007	0.198	-10.64615025
ARHGEF28	HLA-DPB1	-0.17	0.002675008	0.003387872	0.17	-8.20540471
ARHGEF28	HLA-DRA	-0.331	2.19E-09	4.07E-09	0.331	-27.87080309
ARHGEF28	HLA-DRB6	-0.36	6.58E-11	1.38E-10	0.36	-32.75603939
ARHGEF28	HLA-F	-0.354	1.31E-10	2.67E-10	0.354	-31.8014441
ARHGEF28	HLA-G	-0.315	1.47E-08	2.62E-08	0.315	-25.18550849
ARHGEF28	HLA-DMB	-0.487	7.97E-20	3.24E-19	0.487	-61.42045885
ARHGEF28	HLA-DPA1	-0.416	2.18E-14	5.42E-14	0.416	-44.06846033
IREB2	HLA-E	-0.294	1.41E-07	2.38E-07	0.294	-22.00009155
IREB2	HLA-C	-0.407	8.59E-14	2.08E-13	0.407	-42.12631952
IREB2	HLA-J	-0.212	0.000171448	0.000242044	0.212	-12.01244185
IREB2	HLA-DQB2	0.303	5.40E-08	9.36E-08	0.303	-23.34884674
IREB2	HLA-A	-0.358	8.43E-11	1.74E-10	0.358	-32.41674903
IREB2	HLA-DMA	-0.479	3.54E-19	1.33E-18	0.479	-59.38766062
IREB2	HLA-DOB	-0.494	1.73E-20	7.43E-20	0.494	-63.54464271
IREB2	HLA-DRB1	-0.319	9.35E-09	1.68E-08	0.319	-25.83099015
IREB2	HLA-B	-0.325	4.88E-09	8.84E-09	0.325	-26.75335953
IREB2	HLA-DPB1	-0.219	0.000104134	0.000148763	0.219	-12.71469235
IREB2	HLA-DRA	-0.256	4.87E-06	7.52E-06	0.256	-17.02059978
IREB2	HLA-DRB6	-0.268	1.65E-06	2.62E-06	0.268	-18.53965051
IREB2	HLA-F	-0.315	1.51E-08	2.67E-08	0.315	-25.15669389
IREB2	HLA-G	-0.267	1.87E-06	2.97E-06	0.267	-18.36247942
IREB2	HLA-DMB	-0.404	1.26E-13	2.98E-13	0.404	-41.60898407
IREB2	HLA-DPA1	-0.307	3.35E-08	5.85E-08	0.307	-24.02704876
SIDT1	HLA-E	0.433	1.26E-15	3.49E-15	0.433	-48.02659595
SIDT1	HLA-DPB2	0.167	0.003248132	0.004070766	0.167	-7.940483891
SIDT1	HLA-C	0.702	2.78E-47	7.84E-46	0.702	-149.8375904
SIDT1	HLA-J	0.221	8.95E-05	0.000128683	0.221	-12.92389366
SIDT1	HLA-DQB2	-0.185	0.001069033	0.001402011	0.185	-9.478286773
SIDT1	HLA-A	0.511	5.55E-22	2.61E-21	0.511	-68.37657725
SIDT1	HLA-DMA	0.699	8.32E-47	2.22E-45	0.699	-148.3376536
SIDT1	HLA-DOB	0.672	4.03E-42	9.41E-41	0.672	-132.9645884
SIDT1	HLA-DRB1	0.462	9.22E-18	2.99E-17	0.462	-54.89233328
SIDT1	HLA-B	0.43	2.13E-15	5.75E-15	0.43	-47.30571323
SIDT1	HLA-DPB1	0.279	5.74E-07	9.34E-07	0.279	-20.03014889
SIDT1	HLA-DRA	0.511	5.41E-22	2.57E-21	0.511	-68.39816379
SIDT1	HLA-DRB6	0.197	0.000487153	0.000662418	0.197	-10.55996988
SIDT1	HLA-F	0.473	1.17E-18	4.11E-18	0.473	-57.75469633
SIDT1	HLA-G	0.422	8.29E-15	2.14E-14	0.422	-45.4098674
SIDT1	HLA-DMB	0.575	1.13E-28	9.66E-28	0.575	-89.74204785
SIDT1	HLA-DPA1	0.555	1.89E-26	1.24E-25	0.555	-82.73310448
ENDOU	HLA-E	-0.343	5.47E-10	1.06E-09	0.343	-29.80966829
ENDOU	HLA-C	-0.613	2.31E-33	3.16E-32	0.613	-104.640848
ENDOU	HLA-J	-0.154	0.006543949	0.008095607	0.154	-6.948644979
ENDOU	HLA-DQB2	0.348	2.87E-10	5.71E-10	0.348	-30.70592869
ENDOU	HLA-DQA1	-0.19	0.000761071	0.001014761	0.19	-9.944643716
ENDOU	HLA-A	-0.457	2.05E-17	6.47E-17	0.457	-53.77995416
ENDOU	HLA-DMA	-0.565	1.56E-27	1.22E-26	0.565	-86.07764587
ENDOU	HLA-DOB	-0.643	1.57E-37	2.89E-36	0.643	-118.0565413
ENDOU	HLA-DRB1	-0.475	7.78E-19	2.81E-18	0.475	-58.30489323
ENDOU	HLA-B	-0.401	2.01E-13	4.68E-13	0.401	-40.95733138
ENDOU	HLA-DPB1	-0.175	0.001933524	0.002474911	0.175	-8.65840793
ENDOU	HLA-DRA	-0.362	4.94E-11	1.04E-10	0.362	-33.15720826
ENDOU	HLA-DRB6	-0.279	6.12E-07	9.93E-07	0.279	-19.94175587
ENDOU	HLA-F	-0.42	1.04E-14	2.63E-14	0.42	-45.11427366
ENDOU	HLA-G	-0.324	5.49E-09	9.90E-09	0.324	-26.58940903
ENDOU	HLA-DMB	-0.5	4.80E-21	2.15E-20	0.5	-65.33145686
ENDOU	HLA-DPA1	-0.412	3.71E-14	9.09E-14	0.412	-43.32274111
SPATS2	HLA-E	0.454	3.34E-17	1.04E-16	0.454	-53.09279483
SPATS2	HLA-C	0.728	1.61E-52	5.95E-51	0.728	-166.8458285
SPATS2	HLA-DQB2	-0.343	5.21E-10	1.02E-09	0.343	-29.8675091
SPATS2	HLA-A	0.454	3.90E-17	1.21E-16	0.454	-52.87685196
SPATS2	HLA-DMA	0.647	4.21E-38	8.09E-37	0.647	-119.8958544
SPATS2	HLA-DOB	0.79	2.34E-67	3.74E-65	0.79	-214.0209998
SPATS2	HLA-DRB1	0.382	3.14E-12	6.95E-12	0.382	-37.06578338
SPATS2	HLA-B	0.482	1.86E-19	7.30E-19	0.482	-60.24889309
SPATS2	HLA-DRA	0.424	6.07E-15	1.58E-14	0.424	-45.85055548
SPATS2	HLA-F	0.422	8.74E-15	2.24E-14	0.422	-45.34102819
SPATS2	HLA-G	0.376	7.20E-12	1.55E-11	0.376	-35.90881734
SPATS2	HLA-DMB	0.464	6.38E-18	2.08E-17	0.464	-55.41393297
SPATS2	HLA-DPA1	0.467	3.19E-18	1.06E-17	0.467	-56.38366287
ISG20	HLA-E	0.512	3.94E-22	1.89E-21	0.512	-68.8409479
ISG20	HLA-C	0.768	1.39E-61	1.11E-59	0.768	-195.8438192
ISG20	HLA-J	0.216	0.000127513	0.00018055	0.216	-12.43531782
ISG20	HLA-DQB2	-0.246	1.15E-05	1.75E-05	0.246	-15.8045484
ISG20	HLA-DQA1	0.168	0.002971424	0.003743526	0.168	-8.061386612
ISG20	HLA-A	0.532	4.94E-24	2.72E-23	0.532	-74.95929346
ISG20	HLA-DMA	0.756	1.38E-58	9.44E-57	0.756	-186.1116911
ISG20	HLA-DOB	0.832	1.19E-80	5.71E-78	0.832	-256.5970502
ISG20	HLA-DRB1	0.518	1.17E-22	5.98E-22	0.518	-70.50290909
ISG20	HLA-B	0.547	1.31E-25	8.05E-25	0.547	-80.04001299
ISG20	HLA-DOA	0.181	0.001413556	0.001833803	0.181	-9.090945984
ISG20	HLA-DPB1	0.203	0.00031172	0.000429958	0.203	-11.18351619
ISG20	HLA-DRA	0.471	1.70E-18	5.88E-18	0.471	-57.23884221
ISG20	HLA-DRB6	0.341	6.66E-10	1.28E-09	0.341	-29.53742868
ISG20	HLA-F	0.503	2.61E-21	1.18E-20	0.503	-66.19718658
ISG20	HLA-G	0.441	3.31E-16	9.50E-16	0.441	-49.90240732
ISG20	HLA-DMB	0.579	3.89E-29	3.45E-28	0.579	-91.22542675
ISG20	HLA-DPA1	0.547	1.47E-25	8.81E-25	0.547	-79.9097505
ESF1	HLA-E	-0.425	4.68E-15	1.23E-14	0.425	-46.20464712
ESF1	HLA-C	-0.489	4.75E-20	1.95E-19	0.489	-62.15549639
ESF1	HLA-J	-0.327	3.66E-09	6.71E-09	0.327	-27.15065166
ESF1	HLA-DQB2	0.21	0.000191679	0.000269023	0.21	-11.85998273
ESF1	HLA-DQA1	-0.168	0.003002074	0.00377224	0.168	-8.050362809
ESF1	HLA-A	-0.45	7.29E-17	2.21E-16	0.45	-52.00402357
ESF1	HLA-DMA	-0.553	3.51E-26	2.22E-25	0.553	-81.8978375
ESF1	HLA-DOB	-0.544	2.78E-25	1.65E-24	0.544	-79.00571548
ESF1	HLA-DRB1	-0.421	9.01E-15	2.30E-14	0.421	-45.30446542
ESF1	HLA-B	-0.48	2.91E-19	1.12E-18	0.48	-59.63606857
ESF1	HLA-DOA	-0.177	0.001788787	0.002301924	0.177	-8.762944288
ESF1	HLA-DPB1	-0.208	0.000227639	0.000315799	0.208	-11.62870351
ESF1	HLA-DRA	-0.431	1.92E-15	5.27E-15	0.431	-47.43132001
ESF1	HLA-DRB6	-0.35	2.35E-10	4.72E-10	0.35	-30.98188344
ESF1	HLA-F	-0.439	4.82E-16	1.36E-15	0.439	-49.38341651
ESF1	HLA-G	-0.388	1.35E-12	3.04E-12	0.388	-38.26000934
ESF1	HLA-DMB	-0.474	9.03E-19	3.23E-18	0.474	-58.10124583
ESF1	HLA-DPA1	-0.452	4.93E-17	1.52E-16	0.452	-52.55073053
PUS7	HLA-E	-0.635	1.86E-36	3.20E-35	0.635	-114.5914665
PUS7	HLA-C	-0.606	1.80E-32	2.27E-31	0.606	-101.7957029
PUS7	HLA-J	-0.513	3.02E-22	1.50E-21	0.513	-69.17964623
PUS7	HLA-DQB2	0.184	0.00117179	0.001528421	0.184	-9.353742014
PUS7	HLA-DQA1	-0.185	0.001037327	0.001367903	0.185	-9.513818203
PUS7	HLA-A	-0.507	1.13E-21	5.18E-21	0.507	-67.38677975
PUS7	HLA-DMA	-0.634	2.91E-36	4.82E-35	0.634	-113.997398
PUS7	HLA-DOB	-0.593	8.95E-31	9.55E-30	0.593	-96.40255324
PUS7	HLA-DRB1	-0.547	1.39E-25	8.43E-25	0.547	-79.97291448
PUS7	HLA-B	-0.567	1.01E-27	8.23E-27	0.567	-86.65173011
PUS7	HLA-DOA	-0.407	8.99E-14	2.16E-13	0.407	-42.076315
PUS7	HLA-DPB1	-0.326	4.11E-09	7.48E-09	0.326	-26.99498556
PUS7	HLA-DRA	-0.482	2.04E-19	7.90E-19	0.482	-60.13505223
PUS7	HLA-DRB6	-0.441	3.50E-16	9.94E-16	0.441	-49.83724397
PUS7	HLA-F	-0.587	3.83E-30	3.68E-29	0.587	-94.45674962
PUS7	HLA-G	-0.59	2.05E-30	2.10E-29	0.59	-95.26677388
PUS7	HLA-DMB	-0.532	4.99E-24	2.72E-23	0.532	-74.95929346
PUS7	HLA-DPA1	-0.534	2.95E-24	1.66E-23	0.534	-75.66978299
WARS	HLA-E	0.529	8.43E-24	4.55E-23	0.529	-74.21922748
WARS	HLA-C	0.735	8.02E-54	3.21E-52	0.735	-171.0585021
WARS	HLA-J	0.328	3.45E-09	6.34E-09	0.328	-27.23379158
WARS	HLA-DQB2	-0.24	1.97E-05	2.93E-05	0.24	-15.06009367
WARS	HLA-DQA1	0.21	0.000203041	0.000283313	0.21	-11.78531611
WARS	HLA-A	0.592	9.57E-31	9.99E-30	0.592	-96.3379295
WARS	HLA-DMA	0.721	4.48E-51	1.43E-49	0.721	-162.2556595
WARS	HLA-DOB	0.672	4.12E-42	9.41E-41	0.672	-132.9645884
WARS	HLA-DRB1	0.509	7.07E-22	3.26E-21	0.509	-68.05485678
WARS	HLA-B	0.613	2.16E-33	3.05E-32	0.613	-104.6927645
WARS	HLA-DOA	0.16	0.004771024	0.005932879	0.16	-7.397051889
WARS	HLA-DPB1	0.21	0.000201546	0.000282046	0.21	-11.79178097
WARS	HLA-DRA	0.593	8.59E-31	9.37E-30	0.593	-96.42913443
WARS	HLA-DRB6	0.323	5.86E-09	1.05E-08	0.323	-26.49976349
WARS	HLA-F	0.564	2.18E-27	1.66E-26	0.564	-85.63487691
WARS	HLA-G	0.473	1.19E-18	4.17E-18	0.473	-57.73324729
WARS	HLA-DMB	0.632	5.82E-36	9.31E-35	0.632	-113.0493891
WARS	HLA-DPA1	0.554	2.23E-26	1.43E-25	0.554	-82.53559844
GNL2	HLA-E	-0.461	9.77E-18	3.15E-17	0.461	-54.81832446
GNL2	HLA-DPB2	-0.276	8.26E-07	1.33E-06	0.276	-19.5204459
GNL2	HLA-C	-0.438	5.91E-16	1.66E-15	0.438	-49.09915107
GNL2	HLA-J	-0.588	2.83E-30	2.77E-29	0.588	-94.86398042
GNL2	HLA-A	-0.407	8.78E-14	2.12E-13	0.407	-42.10306524
GNL2	HLA-DMA	-0.441	3.33E-16	9.50E-16	0.441	-49.90240732
GNL2	HLA-DOB	-0.38	4.42E-12	9.69E-12	0.38	-36.58685512
GNL2	HLA-DRB1	-0.309	2.77E-08	4.86E-08	0.309	-24.29464895
GNL2	HLA-B	-0.445	1.81E-16	5.43E-16	0.445	-50.71107945
GNL2	HLA-DOA	-0.359	7.80E-11	1.62E-10	0.359	-32.5217684
GNL2	HLA-DPB1	-0.257	4.41E-06	6.87E-06	0.257	-17.15066752
GNL2	HLA-DRA	-0.361	5.38E-11	1.13E-10	0.361	-33.03879797
GNL2	HLA-DRB6	-0.218	0.000112932	0.000160853	0.218	-12.60197222
GNL2	HLA-F	-0.523	3.49E-23	1.82E-22	0.523	-72.21784018
GNL2	HLA-G	-0.565	1.41E-27	1.12E-26	0.565	-86.20080398
GNL2	HLA-DMB	-0.244	1.35E-05	2.03E-05	0.244	-15.59012856
GNL2	HLA-DPA1	-0.375	8.80E-12	1.88E-11	0.375	-35.63182525
AZGP1	HLA-E	-0.282	4.58E-07	7.47E-07	0.282	-20.35161911
AZGP1	HLA-C	-0.417	1.90E-14	4.75E-14	0.417	-44.25833962
AZGP1	HLA-J	-0.221	8.99E-05	0.000128798	0.221	-12.9226049
AZGP1	HLA-DQB2	0.289	2.12E-07	3.53E-07	0.289	-21.43408358
AZGP1	HLA-A	-0.291	1.78E-07	2.97E-07	0.291	-21.68362011
AZGP1	HLA-DMA	-0.344	4.94E-10	9.72E-10	0.344	-29.93793286
AZGP1	HLA-DOB	-0.431	1.96E-15	5.33E-15	0.431	-47.41417626
AZGP1	HLA-DRB1	-0.26	3.56E-06	5.59E-06	0.26	-17.44835227
AZGP1	HLA-B	-0.26	3.41E-06	5.37E-06	0.26	-17.5066526
AZGP1	HLA-DOA	-0.193	0.000640055	0.000858174	0.193	-10.18644144
AZGP1	HLA-DRA	-0.257	4.59E-06	7.13E-06	0.257	-17.09810409
AZGP1	HLA-F	-0.296	1.06E-07	1.80E-07	0.296	-22.40276204
AZGP1	HLA-G	-0.296	1.14E-07	1.94E-07	0.296	-22.2988938
AZGP1	HLA-DMB	-0.282	4.49E-07	7.35E-07	0.282	-20.37578389
AZGP1	HLA-DPA1	-0.244	1.41E-05	2.11E-05	0.244	-15.53233104
ZC3H12D	HLA-E	0.287	2.60E-07	4.30E-07	0.287	-21.14901946
ZC3H12D	HLA-C	0.586	6.43E-30	5.94E-29	0.586	-93.76572675
ZC3H12D	HLA-DQB2	-0.209	0.000207153	0.000288212	0.209	-11.76057983
ZC3H12D	HLA-A	0.425	4.72E-15	1.24E-14	0.425	-46.19967041
ZC3H12D	HLA-DMA	0.637	1.03E-36	1.83E-35	0.637	-115.3945831
ZC3H12D	HLA-DOB	0.614	1.46E-33	2.12E-32	0.614	-105.2160266
ZC3H12D	HLA-DRB1	0.438	6.10E-16	1.70E-15	0.438	-49.0624327
ZC3H12D	HLA-B	0.341	6.61E-10	1.28E-09	0.341	-29.5409313
ZC3H12D	HLA-DPB1	0.269	1.56E-06	2.49E-06	0.269	-18.61314785
ZC3H12D	HLA-DRA	0.455	2.95E-17	9.26E-17	0.455	-53.26133976
ZC3H12D	HLA-DRB6	0.173	0.002250092	0.00285726	0.173	-8.451151951
ZC3H12D	HLA-F	0.357	9.87E-11	2.02E-10	0.357	-32.20141288
ZC3H12D	HLA-G	0.253	6.43E-06	9.80E-06	0.253	-16.63835186
ZC3H12D	HLA-DMB	0.562	3.49E-27	2.46E-26	0.562	-85.0686857
ZC3H12D	HLA-DPA1	0.51	6.46E-22	3.01E-21	0.51	-68.17124137
EIF4E	HLA-E	-0.563	2.85E-27	2.04E-26	0.563	-85.33849066
EIF4E	HLA-C	-0.563	2.47E-27	1.86E-26	0.563	-85.47820087
EIF4E	HLA-J	-0.472	1.25E-18	4.33E-18	0.472	-57.67976773
EIF4E	HLA-DQB2	0.194	0.000574036	0.000773981	0.194	-10.33541504
EIF4E	HLA-DQA1	-0.23	4.43E-05	6.52E-05	0.23	-13.90390696
EIF4E	HLA-A	-0.561	4.13E-27	2.87E-26	0.561	-84.84771544
EIF4E	HLA-DMA	-0.534	3.29E-24	1.84E-23	0.534	-75.52849079
EIF4E	HLA-DOB	-0.477	5.10E-19	1.88E-18	0.477	-58.88056433
EIF4E	HLA-DRB1	-0.528	1.12E-23	5.95E-23	0.528	-73.8305353
EIF4E	HLA-B	-0.6	1.20E-31	1.44E-30	0.6	-99.1301374
EIF4E	HLA-DOA	-0.199	0.000437021	0.000597636	0.199	-10.7084457
EIF4E	HLA-DPB1	-0.15	0.008112509	0.009984627	0.15	-6.646075771
EIF4E	HLA-DRA	-0.409	6.09E-14	1.48E-13	0.409	-42.61636337
EIF4E	HLA-DRB6	-0.327	3.84E-09	7.01E-09	0.327	-27.08865096
EIF4E	HLA-F	-0.569	5.63E-28	4.66E-27	0.569	-87.47261484
EIF4E	HLA-G	-0.492	2.48E-20	1.03E-19	0.492	-63.06889506
EIF4E	HLA-DMB	-0.415	2.62E-14	6.48E-14	0.415	-43.81078298
EIF4E	HLA-DPA1	-0.494	1.90E-20	8.07E-20	0.494	-63.42615733
ERN1	HLA-E	0.332	2.14E-09	4.00E-09	0.332	-27.89735333
ERN1	HLA-C	0.596	3.63E-31	4.15E-30	0.596	-97.606095
ERN1	HLA-DQB2	-0.301	6.32E-08	1.09E-07	0.301	-23.13159365
ERN1	HLA-A	0.368	2.14E-11	4.55E-11	0.368	-34.3561149
ERN1	HLA-DMA	0.521	5.11E-23	2.64E-22	0.521	-71.68261337
ERN1	HLA-DOB	0.661	2.50E-40	5.21E-39	0.661	-127.1728217
ERN1	HLA-DRB1	0.255	5.49E-06	8.42E-06	0.255	-16.85835658
ERN1	HLA-B	0.405	1.15E-13	2.73E-13	0.405	-41.73707845
ERN1	HLA-DRA	0.338	1.07E-09	2.04E-09	0.338	-28.86981946
ERN1	HLA-F	0.294	1.40E-07	2.38E-07	0.294	-22.00108385
ERN1	HLA-G	0.254	6.07E-06	9.28E-06	0.254	-16.71717609
ERN1	HLA-DMB	0.33	2.68E-09	4.95E-09	0.33	-27.5891145
ERN1	HLA-DPA1	0.351	2.03E-10	4.12E-10	0.351	-31.17617119
INTS7	HLA-E	-0.606	1.92E-32	2.36E-31	0.606	-101.7386483
INTS7	HLA-DPB2	-0.199	0.000435812	0.000597636	0.199	-10.7084457
INTS7	HLA-C	-0.542	4.49E-25	2.56E-24	0.542	-78.36823302
INTS7	HLA-J	-0.629	1.28E-35	1.99E-34	0.629	-111.9543761
INTS7	HLA-DQB1	0.19	0.000767125	0.001019999	0.19	-9.937215888
INTS7	HLA-DQA1	-0.185	0.001081569	0.001414586	0.185	-9.465404036
INTS7	HLA-A	-0.443	2.40E-16	7.02E-16	0.443	-50.34034262
INTS7	HLA-DMA	-0.406	9.76E-14	2.33E-13	0.406	-41.96374118
INTS7	HLA-DOB	-0.429	2.59E-15	6.92E-15	0.429	-47.03907967
INTS7	HLA-DRB1	-0.376	7.44E-12	1.59E-11	0.376	-35.86887828
INTS7	HLA-B	-0.468	2.76E-18	9.26E-18	0.468	-56.58405772
INTS7	HLA-DOA	-0.513	3.27E-22	1.60E-21	0.513	-69.08249078
INTS7	HLA-DPB1	-0.258	4.14E-06	6.47E-06	0.258	-17.23838809
INTS7	HLA-DRA	-0.285	3.23E-07	5.32E-07	0.285	-20.84184995
INTS7	HLA-DRB6	-0.402	1.81E-13	4.24E-13	0.402	-41.10077122
INTS7	HLA-F	-0.557	1.31E-26	8.85E-26	0.557	-83.22496637
INTS7	HLA-G	-0.652	7.54E-39	1.51E-37	0.652	-122.3177793
INTS7	HLA-DMB	-0.266	1.97E-06	3.11E-06	0.266	-18.29580918
INTS7	HLA-DPA1	-0.315	1.50E-08	2.66E-08	0.315	-25.16150917
TPR	HLA-E	-0.398	3.17E-13	7.28E-13	0.398	-40.32053046
TPR	HLA-C	-0.458	1.62E-17	5.15E-17	0.458	-54.10929209
TPR	HLA-J	-0.357	9.08E-11	1.87E-10	0.357	-32.31557459
TPR	HLA-DQA1	-0.156	0.005950865	0.007380918	0.156	-7.081983983
TPR	HLA-A	-0.337	1.19E-09	2.26E-09	0.337	-28.72395532
TPR	HLA-DMA	-0.473	1.12E-18	3.97E-18	0.473	-57.80534187
TPR	HLA-DOB	-0.484	1.41E-19	5.59E-19	0.484	-60.63289121
TPR	HLA-DRB1	-0.341	7.42E-10	1.42E-09	0.341	-29.39330071
TPR	HLA-B	-0.31	2.58E-08	4.53E-08	0.31	-24.39602978
TPR	HLA-DOA	-0.401	2.08E-13	4.83E-13	0.401	-40.91244487
TPR	HLA-DPB1	-0.307	3.61E-08	6.27E-08	0.307	-23.92616528
TPR	HLA-DRA	-0.225	6.52E-05	9.43E-05	0.225	-13.37303589
TPR	HLA-DRB6	-0.47	1.77E-18	6.06E-18	0.47	-57.19571393
TPR	HLA-F	-0.36	6.86E-11	1.43E-10	0.36	-32.70081419
TPR	HLA-G	-0.437	7.21E-16	2.00E-15	0.437	-48.82901904
TPR	HLA-DMB	-0.395	5.36E-13	1.22E-12	0.395	-39.57605127
TPR	HLA-DPA1	-0.293	1.51E-07	2.54E-07	0.293	-21.9109872
RRBP1	HLA-E	0.482	1.87E-19	7.30E-19	0.482	-60.24889309
RRBP1	HLA-C	0.575	1.01E-28	8.79E-28	0.575	-89.87800918
RRBP1	HLA-J	0.459	1.58E-17	5.06E-17	0.459	-54.13374421
RRBP1	HLA-DQB2	-0.185	0.001046374	0.001376054	0.185	-9.505247404
RRBP1	HLA-DQA1	0.194	0.000597399	0.000803225	0.194	-10.28190735
RRBP1	HLA-A	0.445	1.87E-16	5.53E-16	0.445	-50.68345075
RRBP1	HLA-DMA	0.478	4.26E-19	1.59E-18	0.478	-59.12859211
RRBP1	HLA-DOB	0.551	5.70E-26	3.55E-25	0.551	-81.21954548
RRBP1	HLA-DRB1	0.42	1.18E-14	2.96E-14	0.42	-44.94024472
RRBP1	HLA-B	0.526	1.89E-23	9.96E-23	0.526	-73.08828346
RRBP1	HLA-DOA	0.341	6.81E-10	1.31E-09	0.341	-29.5110753
RRBP1	HLA-DPB1	0.173	0.002239324	0.002851129	0.173	-8.454251175
RRBP1	HLA-DRA	0.336	1.24E-09	2.34E-09	0.336	-28.67224686
RRBP1	HLA-DRB6	0.292	1.66E-07	2.79E-07	0.292	-21.77531378
RRBP1	HLA-F	0.5	5.54E-21	2.44E-20	0.5	-65.15274929
RRBP1	HLA-G	0.513	3.32E-22	1.61E-21	0.513	-69.07470186
RRBP1	HLA-DMB	0.29	2.10E-07	3.49E-07	0.29	-21.44840682
RRBP1	HLA-DPA1	0.396	4.55E-13	1.04E-12	0.396	-39.80800165
DDX6	HLA-DPB2	-0.151	0.007794325	0.009617676	0.151	-6.700095904
DDX6	HLA-C	0.197	0.000500007	0.000676066	0.197	-10.53054784
DDX6	HLA-DQB2	-0.228	4.98E-05	7.31E-05	0.228	-13.74036086
DDX6	HLA-A	0.161	0.004492361	0.005615452	0.161	-7.476382229
DDX6	HLA-DMA	0.272	1.17E-06	1.88E-06	0.272	-19.02373515
DDX6	HLA-DOB	0.226	5.80E-05	8.44E-05	0.226	-13.5328743
DDX6	HLA-DRB1	0.178	0.001666687	0.002156361	0.178	-8.857185678
DDX6	HLA-B	0.237	2.44E-05	3.61E-05	0.237	-14.75769935
DDX6	HLA-DRA	0.277	7.17E-07	1.16E-06	0.277	-19.71968354
DDX6	HLA-F	0.177	0.001709942	0.002206377	0.177	-8.824104999
DDX6	HLA-DPA1	0.249	8.90E-06	1.35E-05	0.249	-16.17448432
SF1	HLA-DPB2	0.175	0.002010852	0.002567045	0.175	-8.605675542
SF1	HLA-C	-0.182	0.001282492	0.001668282	0.182	-9.227420933
SF1	HLA-DQB2	0.192	0.00068936	0.000921707	0.192	-10.08340464
SF1	HLA-DMA	-0.211	0.000188991	0.000266029	0.211	-11.87613062
SF1	HLA-DOB	-0.231	3.98E-05	5.88E-05	0.231	-14.05460417
SF1	HLA-B	-0.216	0.000123167	0.000174912	0.216	-12.48108657
SF1	HLA-DRA	-0.222	8.04E-05	0.000115923	0.222	-13.07454776
SF1	HLA-DMB	-0.202	0.000340563	0.000468397	0.202	-11.05998141
SF1	HLA-DPA1	-0.206	0.000263135	0.00036399	0.206	-11.42381246
