# Supplementary material for: Crosstalk between RNA-Binding Proteins and Immune Microenvironment Revealed Two RBP Regulatory Patterns with Distinct Immunophenotypes in Periodontitis
Source: J Immunol Res. 2021 Jul 5;2021:5588429. doi: 10.1155/2021/5588429 (PMC8275429; doi:10.1155/2021/5588429)
Supplement: Supplementary Materials — Supplementary figures (FigureS1-S3) were uploaded entitled “supplementary figures.docx.” Supplementary tables (Table S1-S12) were uploaded entitled “Table S1: significantly dysregulated RBPs .txt.” “Table S2: results of univariate logistic regression.txt.” “Table S3: results of multivariate logistic regression.txt.” “Table S4: diversity of immunocytes between healthy and periodontitis samples.txt.” “Table S5: correlation analysis between immnuocytes and RBPs.txt.” “Table S6: diversity of immune pathways between healthy and periodontitis samples.txt.” “Table S7: Correlations between RBPs and immune pathways.txt.” “Table S8: diversity of HLA expression between healthy and periodontitis samples.txt.” “Table S9: correlation between RBPs and HLA expression.txt.” “Table S10: RBP regulatory subtypes.txt.” “Table S11: RBP regulatory subtype related genes.txt.” “Table S12: gene significance and module membership.txt,” respectively, with their filename indicating the contents of the tables. [file 5588429.f1.zip › 5588429.f1/Table S10. RBP-regulatory subtypes..txt]

Table S10. RBP-regulatory subtypes.
id	subtype
GSM404005	c1
GSM404006	c1
GSM404029	c2
GSM404030	c2
GSM404254	c2
GSM404255	c2
GSM404256	c2
GSM404257	c2
GSM404258	c1
GSM404259	c1
GSM404261	c1
GSM404262	c1
GSM404263	c1
GSM404264	c1
GSM404265	c2
GSM404266	c2
GSM404268	c2
GSM404269	c2
GSM404271	c1
GSM404272	c1
GSM404274	c1
GSM404275	c1
GSM404032	c1
GSM404033	c2
GSM404276	c1
GSM404277	c1
GSM404278	c1
GSM404279	c1
GSM404280	c1
GSM404281	c1
GSM404282	c1
GSM404283	c2
GSM404285	c1
GSM404286	c1
GSM404287	c1
GSM404288	c1
GSM404289	c1
GSM404290	c1
GSM404291	c1
GSM404292	c1
GSM404293	c2
GSM404294	c1
GSM404034	c2
GSM404035	c1
GSM404295	c1
GSM404296	c1
GSM404297	c1
GSM404298	c1
GSM404299	c1
GSM404300	c1
GSM404301	c1
GSM404302	c1
GSM404303	c1
GSM404304	c2
GSM404305	c1
GSM404306	c1
GSM404307	c1
GSM404308	c1
GSM404309	c1
GSM404310	c1
GSM404037	c1
GSM404038	c1
GSM404311	c1
GSM404312	c1
GSM404313	c1
GSM404314	c1
GSM404040	c1
GSM404041	c2
GSM404043	c1
GSM404044	c1
GSM404045	c1
GSM404046	c1
GSM404047	c2
GSM404048	c1
GSM404050	c1
GSM404051	c1
GSM404052	c1
GSM404008	c1
GSM404009	c1
GSM404055	c1
GSM404056	c1
GSM404057	c2
GSM404058	c1
GSM404060	c1
GSM404061	c1
GSM404062	c1
GSM404063	c1
GSM404065	c1
GSM404066	c1
GSM404067	c2
GSM404068	c2
GSM404069	c2
GSM404070	c2
GSM404072	c2
GSM404073	c1
GSM404076	c1
GSM404077	c1
GSM404078	c2
GSM404079	c2
GSM404011	c1
GSM404012	c1
GSM404081	c1
GSM404082	c1
GSM404083	c1
GSM404084	c1
GSM404086	c2
GSM404087	c2
GSM404089	c1
GSM404090	c1
GSM404091	c1
GSM404092	c1
GSM404094	c1
GSM404095	c1
GSM404097	c2
GSM404098	c2
GSM404100	c2
GSM404101	c1
GSM404103	c1
GSM404104	c1
GSM404106	c1
GSM404107	c1
GSM404014	c1
GSM404015	c1
GSM404109	c2
GSM404110	c2
GSM404111	c2
GSM404112	c2
GSM404113	c2
GSM404114	c1
GSM404116	c1
GSM404118	c2
GSM404119	c1
GSM404120	c1
GSM404121	c1
GSM404123	c1
GSM404124	c1
GSM404126	c2
GSM404127	c1
GSM404129	c1
GSM404130	c1
GSM404132	c1
GSM404133	c1
GSM404018	c2
GSM404019	c2
GSM404135	c1
GSM404136	c2
GSM404137	c1
GSM404138	c1
GSM404139	c2
GSM404140	c2
GSM404141	c2
GSM404142	c2
GSM404144	c1
GSM404145	c1
GSM404147	c1
GSM404148	c2
GSM404150	c2
GSM404151	c1
GSM404153	c2
GSM404154	c2
GSM404156	c1
GSM404157	c1
GSM404158	c1
GSM404159	c2
GSM404161	c2
GSM404162	c2
GSM404164	c1
GSM404165	c2
GSM404167	c2
GSM404168	c2
GSM404170	c2
GSM404171	c1
GSM404173	c1
GSM404174	c1
GSM404176	c2
GSM404177	c2
GSM404178	c2
GSM404179	c2
GSM404181	c2
GSM404182	c1
GSM404020	c1
GSM404021	c2
GSM404022	c2
GSM404184	c1
GSM404185	c1
GSM404186	c1
GSM404187	c1
GSM404188	c2
GSM404189	c2
GSM404191	c1
GSM404192	c2
GSM404193	c2
GSM404194	c1
GSM404196	c1
GSM404197	c1
GSM404198	c1
GSM404199	c1
GSM404201	c1
GSM404202	c1
GSM404204	c1
GSM404205	c1
GSM404023	c2
GSM404024	c1
GSM404207	c2
GSM404208	c2
GSM404209	c1
GSM404210	c2
GSM404211	c2
GSM404212	c2
GSM404213	c2
GSM404214	c2
GSM404216	c1
GSM404217	c1
GSM404218	c1
GSM404219	c1
GSM404220	c1
GSM404221	c2
GSM404223	c2
GSM404224	c2
GSM404226	c1
GSM404227	c2
GSM404229	c1
GSM404230	c1
GSM404026	c1
GSM404027	c1
GSM404231	c1
GSM404232	c2
GSM404234	c2
GSM404235	c1
GSM404237	c1
GSM404238	c1
GSM404240	c1
GSM404241	c1
GSM404243	c1
GSM404244	c1
GSM404246	c1
GSM404247	c1
GSM404249	c2
GSM404250	c1
GSM404252	c2
GSM404253	c1
