# Supplementary material for: Crosstalk between RNA-Binding Proteins and Immune Microenvironment Revealed Two RBP Regulatory Patterns with Distinct Immunophenotypes in Periodontitis
Source: J Immunol Res. 2021 Jul 5;2021:5588429. doi: 10.1155/2021/5588429 (PMC8275429; doi:10.1155/2021/5588429)
Supplement: Supplementary Materials — Supplementary figures (FigureS1-S3) were uploaded entitled “supplementary figures.docx.” Supplementary tables (Table S1-S12) were uploaded entitled “Table S1: significantly dysregulated RBPs .txt.” “Table S2: results of univariate logistic regression.txt.” “Table S3: results of multivariate logistic regression.txt.” “Table S4: diversity of immunocytes between healthy and periodontitis samples.txt.” “Table S5: correlation analysis between immnuocytes and RBPs.txt.” “Table S6: diversity of immune pathways between healthy and periodontitis samples.txt.” “Table S7: Correlations between RBPs and immune pathways.txt.” “Table S8: diversity of HLA expression between healthy and periodontitis samples.txt.” “Table S9: correlation between RBPs and HLA expression.txt.” “Table S10: RBP regulatory subtypes.txt.” “Table S11: RBP regulatory subtype related genes.txt.” “Table S12: gene significance and module membership.txt,” respectively, with their filename indicating the contents of the tables. [file 5588429.f1.zip › 5588429.f1/Table S11. RBP-regulatory subtype related genes..txt]

Table S11. RBP-regulatory subtype related genes.
RBP-related genes	RBP-related immune genes
CSNK1G3	FURIN
CDC40	BMPR1A
ANKRD13C	PSMC6
MED4	TANK
SHPRH	ESRRA
C3orf38	OGFR
FAM179B	MAPK3
ZNF720	MAPK8
CEP44	GNAI1
STAG1	PGRMC2
IKZF5	PLXNB2
KHSRP	RELA
DOPEY1	PIK3CA
PEX3	CHUK
UBR5	NFYB
RAB21	ENG
GIN1	NCK1
HS2ST1	RELB
ARID4A	NFATC1
PPP4R3B	ZYX
HCFC1R1	PAK4
STRN	NPR1
AGRN	OSGIN1
ARMT1	JAK2
NUP35	GMFB
PAPOLA	TGFB1
INTS2	PIK3R2
SH3BP1	SEMA6C
PLPPR2	BMP1
ZBTB7B	ZC3HAV1L
CEP192	DCK
ASCC3	FCGRT
BRMS1L	IKBKG
RMI1	CACYBP
AGPS	TPM2
CIC
SPAST
SPOPL
ZFAND1
ING3
MIB1
EHD2
ATAD2
FURIN
ICE2
SNX16
TMEM68
BCAM
CETN3
RNFT1
BRWD1
OAF
FANCL
POT1
SORBS3
LIMS2
U2SURP
CEP76
FASTK
CCDC66
ZBTB41
ZUFSP
ORC4
ZNHIT6
PDIK1L
ZNF277
TMEM267
ATP10D
ETFDH
AGL
METTL4
DNAJC9
THAP1
HAUS3
NAT1
ETNK1
FAM214B
MFN1
RRN3
FXR2
PRRC2A
TIGD2
VPS13A
PLRG1
MYO1C
MAP4K3
MASTL
CUL3
TBKBP1
SNAPC3
RPAP3
MIGA1
CAPRIN1
AAAS
RPS6KA4
PRKCSH
VPS54
PPIP5K2
USP38
PPIL4
PAXBP1
GABPA
LIG4
CERCAM
ZFPM1
RIOK2
ZNF184
MYL9
ZNF700
BMPR1A
ZCCHC9
AIMP1
BBS7
RB1CC1
NUP107
INO80B
PSMC6
ALMS1
ZNF219
USP8
MBD3
TRAPPC6B
DENND4A
SEH1L
ZBTB11
TUBE1
KIF11
FLVCR1
CHPF
FSTL3
FBXO8
CDK12
CBLL1
EPT1
FPGT
ZC3H8
TRIP4
EXOC8
IPO5
PPWD1
TANK
CYB5B
SEC24B
ASF1A
PBK
PAQR3
TRIM59
NEDD1
PTPA
GOLGA4
ABCB10
VPS37A
TNPO1
GSK3A
ACBD5
RFX7
SPTSSA
FLOT2
EHHADH
FAR1
WIZ
SKIV2L2
CCNT2
MOSPD1
ESRRA
TSKU
SREK1IP1
SENP7
BRCC3
DPY19L4
GLMN
SCAMP2
BBIP1
AGPAT1
CUL2
PNPLA2
VEZT
TTF2
C1orf27
TOPBP1
TDP2
CDC23
DMXL1
DYNC2LI1
PHF20L1
SEC22A
GIPC1
FAM13B
PALM
LMF2
OGFR
RNF20
CEP57
TDG
VCPKMT
CPEB3
CENPK
KLHL20
DDX52
LACTB2
C12orf29
ICE1
MEIS3
FKBP8
ABCA5
COG6
EMC10
ASUN
LAMTOR3
HMGN5
HSDL2
C6orf120
CENPC
ODF2L
RNF138
C8orf76
USF2
PEX12
PDHX
PRPF4B
ANGEL2
NXT2
PEX1
MED7
ZMYM5
RRP15
CCNE2
SCP2
RNPEPL1
GRAMD1C
GMCL1
SMC2
TBCK
ERF
CNOT6
ZDHHC21
SMARCA5
TRMT61A
EGFL7
FMR1
SMAD2
TMEM132A
SMC6
USP53
HMGA1
COPS2
ANKRA2
PCYT2
CARNMT1
COMMD2
CRNKL1
HSPA4L
MAPK3
SENP6
ZNF25
RAP2C
UEVLD
SCOC
ZDHHC12
FAM3A
TTC37
SLC25A40
MAPK8
ZNF84
E2F4
SLTM
NIPBL
ARFGAP1
DLGAP4
ALKBH8
GNAI1
CREB3L1
VTA1
JKAMP
CCDC91
STXBP5
C1QTNF1
CERS6
TROVE2
POC1B
RNF26
ARL14EP
TM2D3
NUDT5
TMEM63B
RLIM
WDR47
HACE1
ZMYM6
ZNF780A
MTM1
BNIP2
CDK16
PIGB
SLC16A7
CORO1B
TRMT13
DBF4
TMA16
IFT80
GNPDA2
ATP2C1
HCFC2
CLCN7
FAM204A
DMWD
C21orf91
TMF1
MDM1
CAMSAP2
DLD
ZNF326
OMA1
POLE2
COMTD1
LGI4
ZDHHC24
RAD51AP1
CPSF2
ATAD1
ABCD1
RWDD3
ATP6V1C1
PSMA2
GNAI2
CLPX
BCL7C
TRMT11
PPP1R21
MIER3
ZNF292
LZTFL1
ZNF140
BLZF1
OTUD5
SRFBP1
PPIL2
RNF170
ZNF468
FBXO38
ECE1
ARHGEF2
OPA1
EIF3J
APOOL
ZNF506
ACADSB
CRYZL1
PPP4R2
LRCH4
FIP1L1
PIGF
SOCS4
TIA1
KIF3A
ZNF639
RPE
GDAP1
MAZ
FAM89B
ALG12
SLC35A5
SHKBP1
SRSF8
ZCCHC8
CTDSP1
UBE2K
DPH3
LRRC58
WRN
CHMP1A
AHCTF1
GHITM
RNGTT
UBR3
SAMD1
ZNF385A
NT5DC1
ZZZ3
PRRX2
PRMT9
PGRMC2
ARSA
GORAB
TMEM167A
TAZ
PLXNB2
TXNDC16
NUFIP2
EPS8
ZBTB33
PRKAR1B
LNPK
FOPNL
NAP1L5
FAM175A
KAT2B
PIK3C3
RAB11FIP2
TRIM33
SLC35A3
GRK2
FAM65A
SAMD10
WAS
RSL24D1
MROH6
GPBP1
HMMR
CCNH
ATAD3A
SCYL3
ZYG11B
GMNN
SUGT1
TMEM109
TTYH3
GCFC2
OTUD6B-AS1
RELA
REV1
WNT10A
PIK3CA
RNPC3
C2CD5
TRIQK
ABHD5
ADAM15
PTGES2
CHUK
LYRM7
NFYB
PHC3
MRS2
UPF2
PNN
PCMTD2
MFSD12
HNRNPUL1
KIF5B
SAMD4B
SPDL1
GALNT7
CCDC126
TTK
ACTR6
PLD2
IGIP
WNT7B
ATG2B
EIF4E
ANKRD46
RHOT2
ZMYM4
PFKL
CEP70
IBTK
MBLAC2
CHMP5
FRMD6
RCHY1
ENG
CSTF3
GRSF1
ANAPC4
ICK
POLI
RBAK
SLC30A9
MFSD8
USP31
CUL7
STAM
HES4
NCK1
NUF2
KCNN4
HDHD2
LSM8
DEPDC7
HCFC1
RELB
LYPLA2
POLL
CD151
ITGB4
ALG13
SCAF1
SRP9
VTI1B
CMSS1
G6PC3
FUBP1
C1D
CSE1L
AP2A1
CCDC88B
CTDSPL2
KIF2A
DNAJC21
KCTD9
HNRNPU
XRN1
LRFN4
BRIP1
HEATR5A
FBXO5
AMD1
FNBP1L
ZNF260
SLC39A13
PHF14
RAD23B
PIGX
DTX3
FBXO28
STARD3
NFATC1
CLK3
LARP7
ZYX
G2E3
ZNF296
CASK
SOCS5
SGMS1
C11orf57
ORC2
COLGALT1
CTDNEP1
SMARCD1
GTF3C3
FAM63B
PAK4
ZNF430
MAP4K5
FAM188A
RANBP6
MUT
AKTIP
AP1M1
TIAM2
KPNA5
PACS1
OSGEPL1
BIRC6
RTEL1
C12orf66
MRPS34
LYSMD3
GBAS
TMEM65
UNC119
EFR3A
TM9SF3
BCLAF1
PIBF1
SNX13
SEZ6L2
MIER2
CRTC1
NDUFA5
ZNF227
SACS
FIGNL1
C1orf52
EZH2
CEP120
SOD3
PIGQ
LYPLAL1
TAF5
SUCO
PHKB
RNF167
ERI1
BRI3BP
TMUB1
GPATCH2L
SMPD1
CENPL
LIMD2
EOGT
RBM12B
NECTIN1
ZC3H13
WRB
ZC3H14
TMEM33
RBBP7
SMYD5
MAP3K10
RHOT1
MBOAT7
PPM1B
UTP15
C2orf49
FKTN
FASTKD3
MTR
FBXL4
POLR2B
PCMT1
EFNB1
STK3
NEPRO
XPOT
C11orf54
PITPNM1
TNS4
NUDT12
SUV39H2
ABI1
KPNA2
GPAA1
SFXN1
PDS5A
ABHD13
CMTR2
ZNF138
NOL11
MRC2
RCN3
NUP133
NADK
EIF3F
ATN1
RECQL
PRKAA1
SNX14
DHX29
ENOPH1
NPR1
TRIM13
TTC8
OSGIN1
ARHGAP12
SRSF1
APPBP2
DCAF10
TAF1D
ZNF605
ABCE1
ME1
POLDIP2
RABL6
QRSL1
FAM199X
KIAA1586
PLEKHG2
R3HCC1
RAMP2
ZNF367
IMPACT
E2F6
CABIN1
SLC19A2
ASAH2B
PSME4
NAPG
IPO13
DLGAP5
SPIN4
KLF13
URM1
METTL25
ICOSLG
NDC1
ACTN1
DYRK1B
ADSS
B3GAT3
FAM234A
KDSR
RSRC2
LYRM5
CDC34
TAOK2
SLC35C1
MAPKAPK2
ANKMY2
LILRB1
MITD1
ARL13B
KLF8
RPUSD1
IMPA1
RFC5
AIDA
ZNF432
LRBA
TNIP2
ZMIZ2
LCOR
ZC2HC1A
ANAPC10
HSPBP1
WDR20
RASA1
SUCLA2
PLA2G4A
ZWILCH
CDC7
ZDHHC8
DEK
TBC1D4
PRRG1
TBC1D25
SLF1
ZNF45
ETAA1
SLC38A6
LOC283357
ARHGAP23
GON7
SLC25A22
PAXIP1
RBBP6
KLF16
PCGF2
GCC2
RPS6KC1
LZTR1
PALB2
GRK6
CCDC43
FNDC4
KLHL8
RNF14
ITCH
DYNC1LI1
DBR1
SCAF8
MTERF3
DHX40
FBXO3
CLSTN3
BTBD1
WDFY3
CDC42EP1
ALG6
ABHD18
UBXN2B
TTC39B
ADAT2
RHOG
EPS15
RP2
COA5
CENPE
GNB2
GLCE
BCL9L
KDM3A
RCBTB2
TMEM167B
FLNA
ARPP19
CLIP4
MRPL28
CNN2
ARL5B
EFCAB7
TRIM47
PACRGL
TEPSIN
YTHDC2
SLC4A2
FASTKD1
BMT2
JAK2
TOMM40
LMBRD2
E2F8
ZRANB1
GMFB
USP5
ZCCHC10
SMC4
SPTY2D1
TGFB1
C9orf16
PANK3
ZNF180
SPICE1
PXN
AGTPBP1
TMEM41B
CASKIN2
HYAL2
HLTF
TATDN1
TIMM21
MBD4
GPR153
FOXP4
TOMM70
L3MBTL3
AGGF1
COG5
SMNDC1
DUS4L
AKAP7
ATPAF1
PDHB
ZNF581
RELT
ZMYM1
BAZ2B
ZNF23
LSM5
TMTC3
GPN3
TGDS
TMEM8A
PKM
GGTLC1
RPS6KA3
BOK
SOCS6
ZNF316
KIF15
VBP1
NCOR2
COG3
TSPAN18
TMEM126A
KBTBD7
N4BP2
CYB5R3
MCUR1
PIK3R2
UCP2
C16orf87
SEMA6C
AEBP2
UCHL5
SCYL2
ZNF148
SBNO2
CAAP1
ERBIN
C4orf32
KBTBD6
DMTN
RPP30
NABP1
SMURF2
TTC13
THUMPD3
ARL6
TOP2B
AASDHPPT
LLPH
ZNF670
TBC1D31
GRASP
RAPGEF4
BMP1
ARHGAP33
PSIP1
ZNF566
EMC2
KLHL28
C1orf131
CSTF1
LOC286052
BCL7B
BLOC1S3
KIAA1652
SCNN1A
FBXW2
TP53I13
MTO1
OTUD6B
CENPQ
USP46
ITPK1
MAPRE3
DIAPH1
BLOC1S2
NOTCH4
SOX15
MMP14
HIBCH
DMTF1
JADE3
IFT74
ZCCHC11
YES1
FAM129B
THY1
FNDC10
ZC3HAV1L
ZFP37
ZNF765
OAT
ZNF302
CLK4
AGPAT2
DTWD1
DBT
FDX1L
EXOC1
HCCS
LHPP
FBXO30
PLXDC2
PHAX
PLVAP
MAN1A2
PRMT3
MLLT6
PYGO2
LSP1
MYO9B
COPE
MADD
FXR1
ARHGEF17
TBC1D10A
DBP
CNOT7
CHD3
DCK
FAM200B
NECAB3
NSRP1
CRY1
TXNDC9
DOCK7
EXOC5
HERC4
ATAD3B
SLC35F5
CASP8AP2
GUF1
METAP2
KLHL2
TMEM126B
H2AFV
SH2D3C
UBLCP1
ATR
SMARCA1
MAGOHB
HAUS6
WDR36
FCGRT
ZNF823
KLHDC1
GATA1
IKBKG
CHD1
ATG4C
TMEM260
CDC73
B4GALT2
FAM208A
DCTN1
KIAA1468
DCLRE1C
NCOA4
NUDCD1
LEMD3
SHCBP1
ZNF624
DPY19L3
ZNF431
RPP25
SGIP1
DEPDC1
FAM173B
FAM8A1
IPO7
ATG9A
SLC35B3
TRMT1L
SZRD1
EFHD2
ZNF518A
MFSD1
TNK1
AKAP11
MOB4
XPO4
INTS6
GNA13
INTS6L
CCDC9
PRIMPOL
SLC35A1
CACYBP
METTL26
SLC25A43
MLST8
KIAA1804
HEATR5B
YTHDF3
SAMD8
ZCCHC7
PUM2
UBA5
GPATCH11
IMPAD1
MOB1B
TPM2
