# Supplementary material for: Crosstalk between RNA-Binding Proteins and Immune Microenvironment Revealed Two RBP Regulatory Patterns with Distinct Immunophenotypes in Periodontitis
Source: J Immunol Res. 2021 Jul 5;2021:5588429. doi: 10.1155/2021/5588429 (PMC8275429; doi:10.1155/2021/5588429)
Supplement: Supplementary Materials — Supplementary figures (FigureS1-S3) were uploaded entitled “supplementary figures.docx.” Supplementary tables (Table S1-S12) were uploaded entitled “Table S1: significantly dysregulated RBPs .txt.” “Table S2: results of univariate logistic regression.txt.” “Table S3: results of multivariate logistic regression.txt.” “Table S4: diversity of immunocytes between healthy and periodontitis samples.txt.” “Table S5: correlation analysis between immnuocytes and RBPs.txt.” “Table S6: diversity of immune pathways between healthy and periodontitis samples.txt.” “Table S7: Correlations between RBPs and immune pathways.txt.” “Table S8: diversity of HLA expression between healthy and periodontitis samples.txt.” “Table S9: correlation between RBPs and HLA expression.txt.” “Table S10: RBP regulatory subtypes.txt.” “Table S11: RBP regulatory subtype related genes.txt.” “Table S12: gene significance and module membership.txt,” respectively, with their filename indicating the contents of the tables. [file 5588429.f1.zip › 5588429.f1/Table S12. Gene significance and module membership..txt]

Table S12. Gene significance and module membership.
probes	moduleColor	GS.c1	p.GS.c1	GS.c2	p.GS.c2	MMtan	p.MMtan	MMbrown	p.MMbrown	MMpurple	p.MMpurple	MMgreenyellow	p.MMgreenyellow	MMpink	p.MMpink	MMlightcyan	p.MMlightcyan	MMsalmon	p.MMsalmon	MMblack	p.MMblack	MMblue	p.MMblue	MMgreen	p.MMgreen	MMturquoise	p.MMturquoise	MMcyan	p.MMcyan	MMmidnightblue	p.MMmidnightblue	MMmagenta	p.MMmagenta	MMred	p.MMred	MMgrey	p.MMgrey
SERPINB11	black	0.232170778	0.000303394	-0.232170778	0.000303394	-0.208426938	0.001220192	-0.216607001	0.00076798	0.051006502	0.433476124	-0.000883595	0.989181279	0.208252751	0.001232053	0.073146452	0.261007189	0.146403161	0.023890112	0.44205709	8.31E-13	0.317886122	5.48E-07	0.362589234	8.33E-09	-0.313420248	8.03E-07	-0.07196993	0.268775362	-0.094394789	0.146549267	0.072569596	0.264796482	-0.026534804	0.683805626	-0.115013197	0.076581205
CRISP3	black	0.19960082	0.00197294	-0.19960082	0.00197294	-0.071675832	0.270741583	-0.125115877	0.053903319	0.085078941	0.190874498	-0.108004221	0.096452316	0.037787311	0.561852369	-0.039042522	0.548922065	-0.107313693	0.098613748	0.363165044	7.86E-09	0.29074715	5.10E-06	0.254203136	7.30E-05	-0.260748398	4.66E-05	-0.027097865	0.677467853	-0.16996846	0.008601832	-0.040242711	0.536696605	-0.104372922	0.108252103	0.093521588	0.150337896
KRT76	black	0.126935732	0.050479543	-0.126935732	0.050479543	-0.026549174	0.683643598	0.082310831	0.205766561	0.365775449	6.03E-09	0.042702293	0.51207531	0.031171107	0.63231648	0.06736751	0.30066897	0.544557583	8.89E-20	0.462902983	4.84E-14	0.186666421	0.003852015	0.130470908	0.044345183	-0.41856212	1.64E-11	-0.190583239	0.003159291	-0.430469828	3.72E-12	-0.039898273	0.540191174	-0.151322053	0.019509068	0.048933684	0.452419251
MAMDC2	black	0.295337398	3.55E-06	-0.295337398	3.55E-06	-0.077099045	0.236045697	-0.060166503	0.355405988	0.177260255	0.006106854	0.09294637	0.152873889	0.295052593	3.63E-06	0.108976537	0.093472893	0.251448409	8.78E-05	0.674447506	6.17E-33	0.55031419	3.04E-20	0.499184117	2.11E-16	-0.517004242	1.14E-17	-0.246056169	0.000125507	-0.358707603	1.23E-08	-0.02592511	0.690693344	-0.364208712	7.07E-09	0.008104514	0.901019053
EGR3	black	0.225274521	0.000461444	-0.225274521	0.000461444	-0.180642804	0.005187062	-0.1263113	0.051633319	0.000907993	0.988882561	-0.018414846	0.777469156	0.040674188	0.532334947	-0.006081909	0.925638227	0.282219372	9.82E-06	0.337403111	9.55E-08	0.303698673	1.81E-06	0.261151632	4.53E-05	-0.272490084	2.02E-05	-0.03322294	0.610064821	0.232094832	0.000304819	0.171636159	0.00796254	-0.11693348	0.071758622	-0.205834041	0.001408057
LOC100130476	black	0.401977264	1.17E-10	-0.401977264	1.17E-10	-0.145825829	0.024456094	-0.175093285	0.006770286	0.244069388	0.000142856	-0.022931428	0.724873813	0.165045796	0.010762684	0.100135039	0.123426474	0.633188949	4.50E-28	0.737363272	4.33E-42	0.502363298	1.27E-16	0.409616449	4.81E-11	-0.580138766	8.33E-23	-0.301289251	2.20E-06	-0.309934806	1.08E-06	0.103467513	0.111364228	-0.22718388	0.000411379	0.019304118	0.767024566
SLC27A6	black	0.270005733	2.42E-05	-0.270005733	2.42E-05	-0.100073574	0.12365811	0.021897825	0.736806837	0.326267845	2.63E-07	0.113043267	0.081797983	0.282664409	9.49E-06	0.214527084	0.000865333	0.365828226	6.00E-09	0.73821603	3.13E-42	0.522074887	4.84E-18	0.458129997	9.44E-14	-0.664718012	1.02E-31	-0.264591962	3.56E-05	-0.409622499	4.80E-11	-0.054843385	0.399641229	-0.371287877	3.41E-09	-0.063045891	0.332810826
EXPH5	black	0.382429782	1.05E-09	-0.382429782	1.05E-09	-0.315369301	6.80E-07	-0.240541062	0.000179315	0.298531646	2.75E-06	-0.065959296	0.310908751	0.176642635	0.006289747	0.209402506	0.001155678	0.663213091	1.55E-31	0.88887183	5.82E-82	0.557790016	7.33E-21	0.528611913	1.56E-18	-0.756079178	2.44E-45	-0.327679006	2.32E-07	-0.412208571	3.53E-11	0.239755187	0.000188541	-0.054937308	0.398833284	0.054056795	0.40644595
ADH7	black	0.438222491	1.37E-12	-0.438222491	1.37E-12	-0.26496918	3.47E-05	-0.321728364	3.92E-07	0.118896723	0.067086704	0.148709792	0.02174004	0.494579235	4.36E-16	0.177313937	0.006091184	0.437618218	1.49E-12	0.782272051	2.04E-50	0.569089098	7.95E-22	0.677410756	2.57E-33	-0.53180528	8.89E-19	-0.247756079	0.00011225	-0.324791964	2.99E-07	0.009537078	0.883637529	-0.093214052	0.151689751	0.069879228	0.282965434
ABCA12	black	0.460612713	6.68E-14	-0.460612713	6.68E-14	-0.187545009	0.003685677	-0.233939277	0.000271912	0.106161511	0.102305577	0.174053335	0.00711096	0.492824643	5.73E-16	0.121540488	0.061191417	0.619231782	1.37E-26	0.684057338	3.48E-34	0.531506507	9.38E-19	0.576086881	1.92E-22	-0.421545909	1.14E-11	-0.274847639	1.70E-05	-0.175773629	0.006555376	0.015689004	0.809726645	-0.215826468	0.000803264	0.073727648	0.257227243
DSG1	black	0.332360172	1.52E-07	-0.332360172	1.52E-07	-0.175398353	0.006673154	-0.207033203	0.001318104	0.247440996	0.000114603	0.151302683	0.01952485	0.372319312	3.06E-09	0.157305883	0.015133726	0.702263978	1.10E-36	0.695136754	1.10E-35	0.384572338	8.28E-10	0.480472679	3.77E-15	-0.510521917	3.37E-17	-0.304662687	1.67E-06	-0.338944234	8.28E-08	0.148189588	0.022209742	-0.080375281	0.216666433	0.100562023	0.121826611
SOSTDC1	black	0.241680803	0.000166681	-0.241680803	0.000166681	-0.233481246	0.00027976	-0.19417285	0.002625691	0.018028617	0.782018052	-0.040554784	0.533540173	0.24468594	0.000137245	0.312115129	8.97E-07	0.12449627	0.055112093	0.541008519	1.70E-19	0.479326194	4.47E-15	0.477150978	6.18E-15	-0.43437009	2.26E-12	0.100700261	0.121312114	-0.174472325	0.006971907	0.070579787	0.278155438	-0.186334065	0.003916684	-0.166922428	0.009888033
HPGD	black	0.401663113	1.22E-10	-0.401663113	1.22E-10	-0.275275175	1.65E-05	-0.254200192	7.30E-05	0.092540017	0.1546848	0.033137746	0.610981825	0.373373067	2.74E-09	0.267607426	2.87E-05	0.613381333	5.45E-26	0.753411542	7.37E-45	0.58821862	1.51E-23	0.60824255	1.79E-25	-0.541774313	1.48E-19	-0.038972251	0.549642073	-0.173214904	0.007396666	-0.004743017	0.941975711	-0.136242292	0.035677646	0.004204995	0.948548023
RNF128	black	0.340206959	7.36E-08	-0.340206959	7.36E-08	-0.271319674	2.20E-05	-0.31689466	5.97E-07	0.000580285	0.99289488	-0.118779075	0.067359481	0.099991131	0.123969338	0.156954725	0.015364474	0.090293619	0.164989073	0.584212758	3.55E-23	0.516018938	1.35E-17	0.499796958	1.91E-16	-0.515096736	1.58E-17	-0.04818267	0.459395644	-0.069272008	0.287179623	0.148430752	0.021990911	-0.022474745	0.730138268	-0.106675424	0.100645615
MUC15	black	0.490224945	8.58E-16	-0.490224945	8.58E-16	-0.309772467	1.09E-06	-0.377007441	1.87E-09	0.119724565	0.06519272	0.14857774	0.021858452	0.528838678	1.50E-18	0.175849991	0.006531639	0.536551634	3.82E-19	0.863937167	2.95E-72	0.626613995	2.30E-27	0.764946239	5.52E-47	-0.58875065	1.35E-23	-0.246428471	0.000122484	-0.30294585	1.92E-06	0.167946367	0.009437842	-0.059476576	0.360959584	0.068466652	0.292833521
MAF	black	0.293972292	3.96E-06	-0.293972292	3.96E-06	-0.176195945	0.006425059	-0.040850818	0.530554615	0.154573497	0.017011942	-0.086567778	0.183198442	0.331482659	1.64E-07	0.234459025	0.000263254	0.458041	9.56E-14	0.603615502	5.14E-25	0.467931939	2.37E-14	0.387599143	5.95E-10	-0.419012958	1.55E-11	-0.180968216	0.005105493	-0.328116577	2.23E-07	0.274160668	1.79E-05	-0.335574504	1.13E-07	0.072947835	0.262307646
CSF3	black	-0.38991437	4.60E-10	0.38991437	4.60E-10	0.248486387	0.000106968	0.433959757	2.38E-12	0.054464851	0.402907351	0.088739954	0.172410531	-0.207966136	0.0012518	-0.219276859	0.000657818	-0.446626046	4.53E-13	-0.569279834	7.65E-22	-0.445883414	5.00E-13	-0.34735237	3.74E-08	0.292874724	4.31E-06	0.104799121	0.106811022	0.412456473	3.43E-11	-0.126025401	0.052168854	0.056251561	0.387630611	-0.267026199	3.00E-05
GYS2	black	0.175482192	0.006646679	-0.175482192	0.006646679	-0.107220702	0.098907734	-0.036744299	0.572706819	0.227428886	0.000405332	0.09942144	0.126136569	0.180422829	0.005242863	-0.023217776	0.72157947	0.129878092	0.045327935	0.481275939	3.34E-15	0.323770592	3.28E-07	0.30978972	1.09E-06	-0.404858238	8.41E-11	-0.114026659	0.079159035	-0.156716837	0.015522535	-0.169257014	0.008888154	-0.203559954	0.001594255	0.095107859	0.143509602
ZNF273	black	0.464824296	3.69E-14	-0.464824296	3.69E-14	-0.339339363	7.98E-08	-0.323281898	3.42E-07	0.039029074	0.549059821	0.08302432	0.201850188	0.481484616	3.24E-15	0.234000178	0.000270884	0.440323606	1.04E-12	0.864813112	1.45E-72	0.721205425	1.69E-39	0.755367643	3.28E-45	-0.589102914	1.25E-23	-0.244544636	0.000138513	-0.285360009	7.73E-06	0.098705414	0.12890194	-0.153094808	0.01811076	0.062788837	0.334789687
EPCAM	black	0.451778516	2.26E-13	-0.451778516	2.26E-13	-0.30314786	1.89E-06	-0.320951402	4.20E-07	0.084237564	0.195315118	-0.07300623	0.261924842	0.209844757	0.001127477	0.18322263	0.004571323	0.616729626	2.48E-26	0.734558124	1.26E-41	0.587607658	1.73E-23	0.506889098	6.11E-17	-0.528650406	1.55E-18	-0.248258217	0.000108592	-0.163041713	0.011771541	0.087477106	0.178623379	-0.142294247	0.028175678	0.03724361	0.567498236
MMP9	black	-0.243399834	0.000149191	0.243399834	0.000149191	0.122912009	0.058305184	0.23360747	0.000277576	-0.180777386	0.005153187	-0.089919593	0.166753478	-0.25418275	7.31E-05	0.08513252	0.190594238	-0.418438597	1.66E-11	-0.649587079	6.47E-30	-0.352628687	2.24E-08	-0.382525278	1.03E-09	0.460850308	6.46E-14	0.600921927	9.41E-25	0.55890034	5.91E-21	-0.134465019	0.03817907	0.068148144	0.29508992	-0.231930493	0.000307925
MIF	black	-0.175740544	0.006565684	0.175740544	0.006565684	0.155302208	0.016492147	0.319384427	4.81E-07	0.099741011	0.124917267	0.446777121	4.44E-13	0.074048703	0.255155446	-0.262677152	4.07E-05	-0.150186579	0.02045314	-0.461850801	5.61E-14	-0.394305574	2.82E-10	-0.40273227	1.08E-10	0.345540865	4.45E-08	-0.034566898	0.59567995	0.064186314	0.3241223	-0.273141582	1.93E-05	-0.00725952	0.911294206	0.070813152	0.276565521
HLF	black	0.253787006	7.51E-05	-0.253787006	7.51E-05	-0.208218787	0.001234378	-0.11965419	0.065352007	0.332818356	1.46E-07	-0.01156853	0.859086671	0.154777933	0.016864694	0.225030709	0.000468229	0.517995659	9.68E-18	0.78943303	6.27E-52	0.483688146	2.33E-15	0.420195022	1.34E-11	-0.691017291	4.05E-35	-0.281479763	1.04E-05	-0.505187928	8.05E-17	0.166977797	0.009863212	-0.188820727	0.003455692	-0.049343906	0.448633836
EREG	black	0.232064781	0.000305385	-0.232064781	0.000305385	-0.216904713	0.000754903	-0.158888019	0.014131299	0.069497886	0.285607107	0.037797236	0.561749558	0.051562602	0.428472664	-0.018264798	0.779235484	0.18494787	0.004197104	0.36301668	7.98E-09	0.271893539	2.11E-05	0.306001445	1.50E-06	-0.32758299	2.34E-07	-0.116633148	0.072496139	0.176928574	0.006204472	0.143707154	0.026633134	0.026441999	0.684852378	-0.104109234	0.109151323
VAV3	black	0.423877062	8.52E-12	-0.423877062	8.52E-12	-0.404390712	8.88E-11	-0.273271535	1.91E-05	0.126554218	0.051181894	0.110033201	0.090318681	0.476834937	6.47E-15	0.274847326	1.70E-05	0.549634566	3.46E-20	0.810005689	1.27E-56	0.597969881	1.81E-24	0.636780304	1.82E-28	-0.593891681	4.45E-24	-0.229583499	0.000355605	-0.299039704	2.64E-06	0.084344979	0.194744048	-0.13692448	0.034755104	0.07606002	0.242438638
ALOX15B	black	-0.348189382	3.45E-08	0.348189382	3.45E-08	0.173723946	0.007222008	0.339519024	7.85E-08	0.06439558	0.322544052	0.228563954	0.000378383	-0.017445584	0.788898863	-0.187276911	0.003735733	-0.416431731	2.12E-11	-0.47235538	1.25E-14	-0.388289924	5.51E-10	-0.222277189	0.000551546	0.198169649	0.002128884	0.120724341	0.062964027	0.188947967	0.00343348	-0.208138398	0.001239897	0.090730806	0.162944467	-0.222625168	0.000540308
COL4A2	black	-0.357345473	1.41E-08	0.357345473	1.41E-08	0.150524899	0.020167793	0.525940778	2.48E-18	-0.079489765	0.221788449	0.02014565	0.757179228	-0.115550359	0.075206453	-0.238502445	0.000204169	-0.375307597	2.24E-09	-0.689190179	7.16E-35	-0.415888301	2.27E-11	-0.387050227	6.32E-10	0.536682752	3.73E-19	0.184442373	0.004303783	0.437054135	1.60E-12	-0.173039435	0.007457738	-0.088913437	0.171569748	-0.138311605	0.03294156
LOC441178	black	0.053479541	0.411483162	-0.053479541	0.411483162	-0.14102186	0.029629657	0.067553102	0.29933629	0.256163998	6.39E-05	0.078624308	0.226877165	0.095745894	0.140830742	-0.020289817	0.755496448	-0.031141483	0.632640247	0.330721207	1.76E-07	0.210735792	0.001072569	0.241720493	0.000166257	-0.297301881	3.04E-06	-0.01752657	0.787942093	-0.185777328	0.004027211	-0.105322733	0.105061289	-0.077477318	0.233747933	-0.090030709	0.166227844
ARRDC4	black	0.469944109	1.77E-14	-0.469944109	1.77E-14	-0.369938516	3.93E-09	-0.298959444	2.66E-06	0.111227065	0.086857931	-0.008804435	0.892520391	0.232335482	0.000300325	0.220294402	0.000619822	0.562800273	2.76E-21	0.767464348	1.83E-47	0.604908537	3.83E-25	0.577512448	1.43E-22	-0.609970373	1.20E-25	-0.228333203	0.000383723	-0.175633679	0.00659908	0.132464249	0.041170767	-0.092406074	0.155285249	0.051692611	0.427307759
SOX21.AS1	black	0.271433904	2.18E-05	-0.271433904	2.18E-05	-0.236878283	0.000226234	0.148473236	0.021952555	0.337422216	9.53E-08	0.125032108	0.054065444	0.35391229	1.98E-08	0.168392065	0.009247625	0.480303022	3.87E-15	0.693030454	2.15E-35	0.528718414	1.53E-18	0.447502716	4.03E-13	-0.569716392	7.01E-22	-0.226078822	0.000439703	-0.344884641	4.73E-08	-0.101504915	0.118350799	-0.379456425	1.44E-09	-0.053842685	0.408310026
YOD1	black	0.41014969	4.51E-11	-0.41014969	4.51E-11	-0.271817212	2.12E-05	-0.310457442	1.03E-06	0.116984506	0.071633928	0.225803897	0.000447025	0.507730587	5.33E-17	0.214363918	0.000873431	0.670143503	2.16E-32	0.723246305	8.13E-40	0.49039756	8.35E-16	0.608097656	1.85E-25	-0.489609402	9.43E-16	-0.201298257	0.001801526	-0.222029426	0.00055968	0.096126234	0.139252115	-0.029729875	0.648148131	0.016002639	0.80599758
DNER	black	0.17713619	0.006143206	-0.17713619	0.006143206	-0.180278817	0.005279685	0.029408619	0.651699042	0.21399325	0.00089209	-0.032827644	0.6143248	0.04645755	0.475645246	0.071621771	0.271104076	0.533865779	6.17E-19	0.465802616	3.21E-14	0.341015587	6.82E-08	0.108720047	0.094251627	-0.395391455	2.49E-10	-0.228806287	0.00037285	-0.235375353	0.000248614	0.048998469	0.451820244	-0.277307706	1.42E-05	-0.039917801	0.539992748
CAPNS2	black	0.324152212	3.17E-07	-0.324152212	3.17E-07	-0.180872861	0.005129275	-0.287986872	6.32E-06	0.312955076	8.35E-07	-0.067160326	0.302161324	0.10554995	0.104309076	0.230828641	0.000329516	0.615152582	3.60E-26	0.778722997	1.09E-49	0.431788458	3.15E-12	0.347252252	3.77E-08	-0.670582896	1.90E-32	-0.270800951	2.28E-05	-0.454203384	1.62E-13	0.150388399	0.020282503	-0.11371783	0.079980267	0.124228862	0.055640662
CORO1A	black	-0.448985937	3.30E-13	0.448985937	3.30E-13	0.24921979	0.000101898	0.46296406	4.80E-14	-0.039164576	0.547672575	-0.014070141	0.829041183	-0.312905971	8.39E-07	-0.018991461	0.770692065	-0.444085145	6.36E-13	-0.761806923	2.15E-46	-0.515858977	1.39E-17	-0.604998118	3.76E-25	0.553539231	1.65E-20	0.62580239	2.80E-27	0.339163767	8.11E-08	-0.214349118	0.00087417	0.00340385	0.958340874	-0.15060568	0.020100173
HIST1H2BC	black	0.301566772	2.15E-06	-0.301566772	2.15E-06	-0.182954413	0.004632125	-0.222605496	0.000540937	-0.018664011	0.77453857	-0.144746147	0.025545576	0.066044926	0.310279642	0.130398548	0.044464173	0.349420547	3.06E-08	0.402608395	1.09E-10	0.320863015	4.23E-07	0.25666546	6.17E-05	-0.22893158	0.000370018	-0.133311532	0.039880587	-0.020225206	0.756250479	0.228644341	0.000376539	-0.036148007	0.578956443	0.107247553	0.098822776
PDZD2	black	0.245434086	0.000130714	-0.245434086	0.000130714	-0.119326234	0.066098501	-0.211760088	0.001012491	0.140470098	0.030279822	-0.215286959	0.000828519	-0.059097826	0.364031218	0.161603656	0.012545942	0.28971462	5.53E-06	0.534391828	5.62E-19	0.362986204	8.01E-09	0.25050315	9.36E-05	-0.508168287	4.96E-17	-0.146022023	0.024262475	-0.187349069	0.0037222	0.316222077	6.32E-07	-0.106295004	0.101872321	-0.061130502	0.347736492
RORA	black	0.31174205	9.26E-07	-0.31174205	9.26E-07	-0.199768571	0.00195536	-0.245256423	0.000132238	0.271724732	2.14E-05	0.045239151	0.487307933	0.189672751	0.003309403	0.188953178	0.003432573	0.731723209	3.65E-41	0.752073558	1.28E-44	0.425082086	7.33E-12	0.409716967	4.75E-11	-0.622835029	5.77E-27	-0.33340147	1.38E-07	-0.352365424	2.30E-08	0.376847703	1.90E-09	-0.042081311	0.51823585	0.041339429	0.525645389
SPAG17	black	0.21943785	0.000651667	-0.21943785	0.000651667	-0.228955242	0.000369486	-0.133518081	0.03957129	0.283237161	9.09E-06	0.008172655	0.900191154	0.13485474	0.03761823	0.123970078	0.056156175	0.66977069	2.40E-32	0.65913202	4.84E-31	0.365811949	6.01E-09	0.338395175	8.71E-08	-0.549656417	3.44E-20	-0.303237129	1.88E-06	-0.306068703	1.49E-06	0.023343798	0.72013126	-0.034101438	0.60064453	0.029749477	0.647931727
STK39	black	0.339423378	7.92E-08	-0.339423378	7.92E-08	-0.217597781	0.000725252	-0.259365683	5.13E-05	0.174479569	0.006969524	-0.085168802	0.190404629	0.146656375	0.02364546	0.199053263	0.002031329	0.465309669	3.44E-14	0.809210215	1.97E-56	0.578297679	1.22E-22	0.517394175	1.07E-17	-0.625017407	3.40E-27	-0.229135831	0.000365445	-0.262328064	4.17E-05	0.181754245	0.004913197	-0.116019568	0.074022055	0.048859832	0.453102639
ASS1	black	-0.19974222	0.001958112	0.19974222	0.001958112	0.065588619	0.313641684	0.329013116	2.05E-07	0.068756945	0.290787057	0.044335875	0.496052259	-0.07561096	0.245238734	-0.112812525	0.082427343	-0.415118374	2.49E-11	-0.345177014	4.60E-08	-0.237980188	0.000211035	-0.193357992	0.002739074	0.148375441	0.022040934	0.156366267	0.015758056	0.116733073	0.072250074	-0.044463262	0.494814055	-0.032118673	0.621997573	-0.189939113	0.003264833
ANKRD29	black	0.406646533	6.82E-11	-0.406646533	6.82E-11	-0.193917709	0.002660725	-0.243837739	0.000145019	0.136352333	0.035527446	-0.06623907	0.308856399	0.300386999	2.37E-06	0.172296867	0.007721194	0.494133537	4.68E-16	0.863267559	5.05E-72	0.701801067	1.28E-36	0.611741985	7.99E-26	-0.625994879	2.67E-27	-0.28520694	7.82E-06	-0.297549088	2.98E-06	0.037408659	0.565781491	-0.358888678	1.21E-08	0.057106751	0.380444421
CH25H	black	0.232257096	0.000301782	-0.232257096	0.000301782	-0.059018762	0.364674467	-0.071562024	0.271505078	0.066748115	0.305145049	-0.014169019	0.827858399	0.117420307	0.070576119	0.198346434	0.002109031	0.296399786	3.26E-06	0.458664771	8.76E-14	0.402688624	1.08E-10	0.336813377	1.01E-07	-0.387712796	5.87E-10	0.020897955	0.748410755	0.010898837	0.867166417	0.097648578	0.133068782	-0.268140999	2.77E-05	-0.234301315	0.000265854
COTL1	black	-0.337513108	9.45E-08	0.337513108	9.45E-08	0.173232748	0.007390481	0.468725978	2.11E-14	0.009369204	0.885671657	-0.027386428	0.674228542	-0.317279831	5.77E-07	-0.031922793	0.624124735	-0.361704992	9.11E-09	-0.629900545	1.02E-27	-0.393163727	3.20E-10	-0.45757209	1.02E-13	0.424210188	8.17E-12	0.524290198	3.30E-18	0.381165276	1.20E-09	-0.208962068	0.001184406	-0.042546902	0.51361332	-0.168141229	0.009354255
PIR	black	0.299185752	2.61E-06	-0.299185752	2.61E-06	-0.05701683	0.381196178	0.101513197	0.118320614	0.341237754	6.68E-08	0.00266239	0.967409755	0.177889476	0.005925434	0.095445792	0.142085953	0.453526879	1.78E-13	0.673148014	9.02E-33	0.499146671	2.12E-16	0.339514154	7.85E-08	-0.553584126	1.64E-20	-0.286541646	7.06E-06	-0.336932202	9.98E-08	-0.033869649	0.603123696	-0.443079046	7.27E-13	0.06836493	0.293552891
COL21A1	black	0.437891389	1.43E-12	-0.437891389	1.43E-12	-0.397696308	1.92E-10	-0.333848721	1.32E-07	0.010440275	0.872706911	-0.227109926	0.00041322	0.021159482	0.745370027	0.185352798	0.004113374	0.371425525	3.36E-09	0.671859767	1.31E-32	0.594913935	3.56E-24	0.395314262	2.51E-10	-0.462008905	5.49E-14	-0.099329998	0.126487148	-0.23999898	0.000185632	0.202291643	0.001707632	-0.09585177	0.140389929	0.076089342	0.242256578
ZHX1	black	0.392346362	3.51E-10	-0.392346362	3.51E-10	-0.230915947	0.000327755	-0.139878239	0.030990735	0.180491457	0.005225396	0.130134821	0.044900122	0.419229678	1.51E-11	0.182415589	0.004756474	0.407684618	6.04E-11	0.848239562	4.36E-67	0.697460127	5.23E-36	0.707894586	1.69E-37	-0.627883255	1.68E-27	-0.259002874	5.26E-05	-0.287350785	6.64E-06	-0.007674472	0.906246426	-0.267355777	2.93E-05	0.033760481	0.604292921
PERP	black	0.386378009	6.80E-10	-0.386378009	6.80E-10	-0.174562786	0.006942205	-0.333636163	1.35E-07	0.225930543	0.000443638	-0.10305065	0.112820481	0.155485463	0.016363632	0.249460863	0.000100282	0.539909325	2.08E-19	0.8124289	3.26E-57	0.533818308	6.22E-19	0.473819621	1.01E-14	-0.675139462	5.03E-33	-0.270920774	2.26E-05	-0.319175544	4.90E-07	0.176016179	0.006480245	-0.141071618	0.029571615	0.097720499	0.132781969
ATP6V0A4	black	0.237780956	0.000213711	-0.237780956	0.000213711	-0.06130557	0.346354969	-0.235148828	0.000252161	0.052745071	0.41794519	0.004372228	0.946504762	0.102461317	0.114904626	0.034125145	0.600391227	-0.145625715	0.024654949	0.334865169	1.21E-07	0.273164778	1.92E-05	0.285099523	7.89E-06	-0.265074764	3.44E-05	-0.010774185	0.868671873	-0.137500788	0.033991595	-0.067928238	0.29665453	-0.03764405	0.563337394	0.146540113	0.023757521
C1QA	black	-0.39377841	2.99E-10	0.39377841	2.99E-10	0.229189673	0.000364248	0.550266987	3.07E-20	0.056763143	0.383321946	0.007610947	0.907018944	-0.185006567	0.004184872	0.031605587	0.627576041	-0.279124536	1.24E-05	-0.643392375	3.31E-29	-0.490964684	7.65E-16	-0.500584702	1.69E-16	0.481875846	3.06E-15	0.473638235	1.04E-14	0.187674541	0.00366171	-0.184001557	0.004398799	-0.07584146	0.243798654	-0.066017901	0.310478099
PANK1	black	0.437499598	1.51E-12	-0.437499598	1.51E-12	-0.379477509	1.44E-09	-0.273140415	1.93E-05	0.171969875	0.007839812	-0.200954972	0.001835054	0.030709978	0.637364145	0.088606006	0.173061798	0.565183162	1.73E-21	0.746894502	1.04E-43	0.554327716	1.42E-20	0.394203257	2.85E-10	-0.591940026	6.80E-24	-0.248431174	0.000107359	-0.3119752	9.08E-07	0.216616969	0.000767539	-0.057924736	0.373647514	0.141899686	0.02861987
ZNF823	black	0.512834715	2.30E-17	-0.512834715	2.30E-17	-0.351716425	2.45E-08	-0.375391113	2.22E-09	0.058371051	0.369970622	-0.12551758	0.05313146	0.26351469	3.84E-05	0.234664621	0.000259901	0.381895839	1.11E-09	0.884168393	5.80E-80	0.766653102	2.61E-47	0.687916112	1.06E-34	-0.633628175	4.03E-28	-0.179838432	0.005393731	-0.201977468	0.001736832	0.18677562	0.003830978	-0.172586736	0.007617381	0.065391378	0.315102293
EGR2	black	0.153069104	0.018130395	-0.153069104	0.018130395	-0.122663719	0.058819193	-0.098718428	0.128851267	-0.0487502	0.454118175	-0.011025354	0.865638925	0.033434079	0.607794791	0.013510406	0.835743932	0.070608611	0.277958726	0.219021167	0.000667699	0.230389838	0.0003385	0.240910541	0.000175124	-0.169965123	0.008603156	0.089213937	0.170120604	0.209460534	0.001151941	0.105541207	0.104337942	-0.055085812	0.397557818	-0.153512835	0.017794031
CXADR	black	0.420172259	1.35E-11	-0.420172259	1.35E-11	-0.353663188	2.03E-08	-0.305737426	1.53E-06	0.140762677	0.029933562	0.01402622	0.829566691	0.326103555	2.66E-07	0.187166758	0.003756477	0.360721544	1.01E-08	0.840288939	1.10E-64	0.646812359	1.35E-29	0.695272706	1.05E-35	-0.686276324	1.76E-34	-0.248800298	0.000104769	-0.19906508	0.002030052	0.218512999	0.000687744	-0.035960829	0.580924762	-0.036858199	0.571516682
UCP2	black	-0.51425974	1.81E-17	0.51425974	1.81E-17	0.140943743	0.029720975	0.515811269	1.40E-17	-0.005391161	0.934063444	-0.121682152	0.060887956	-0.379159418	1.49E-09	-0.126397395	0.051472949	-0.422665027	9.90E-12	-0.72112054	1.74E-39	-0.540831973	1.76E-19	-0.548527288	4.25E-20	0.506480695	6.53E-17	0.455127344	1.43E-13	0.265346825	3.37E-05	-0.144445198	0.025856594	0.125425028	0.053308479	-0.170233984	0.00849709
TMPRSS11B	black	0.365673646	6.09E-09	-0.365673646	6.09E-09	-0.153365348	0.017905223	-0.301640583	2.14E-06	0.005796152	0.929122714	-0.04757127	0.465119048	0.33755114	9.42E-08	0.104447116	0.108000142	0.189311651	0.003370704	0.698464211	3.78E-36	0.609201893	1.44E-25	0.639002896	1.03E-28	-0.394642272	2.71E-10	-0.149497795	0.021044905	-0.274848175	1.70E-05	0.01930117	0.767059123	-0.183097914	0.004599505	0.059595628	0.359997426
KCNJ2	black	0.37387555	2.60E-09	-0.37387555	2.60E-09	-0.263846033	3.75E-05	-0.321103758	4.14E-07	0.013906382	0.831000918	-0.270254846	2.38E-05	0.074942875	0.249446148	0.299144861	2.62E-06	0.305966551	1.50E-06	0.675063352	5.15E-33	0.582520858	5.06E-23	0.509075282	4.27E-17	-0.489860113	9.08E-16	-0.077856516	0.23146041	-0.081559687	0.209948582	0.253531917	7.64E-05	-0.077557986	0.233259969	-0.040652535	0.532553412
WDR47	black	0.596723508	2.39E-24	-0.596723508	2.39E-24	-0.551570923	2.40E-20	-0.410382034	4.39E-11	-0.105522809	0.104398701	0.017906429	0.783458705	0.412107319	3.57E-11	0.1782464	0.005824684	0.451824112	2.25E-13	0.798526956	6.16E-54	0.74514697	2.09E-43	0.739363773	2.01E-42	-0.420531451	1.29E-11	-0.182079804	0.004835476	-0.182547094	0.004725851	0.212070361	0.000994913	-0.090955581	0.161900669	0.098889421	0.128186856
SAMD9	black	0.412642847	3.35E-11	-0.412642847	3.35E-11	-0.12681247	0.050705581	-0.456800432	1.14E-13	-0.090881947	0.162242055	0.026578728	0.683310416	0.418035639	1.75E-11	0.49243314	6.09E-16	0.165383189	0.010600567	0.667679001	4.38E-32	0.599436062	1.31E-24	0.753886592	6.06E-45	-0.439754924	1.13E-12	0.043979946	0.499520603	-0.090074189	0.166022498	0.096101478	0.139354453	-0.024231265	0.709961159	-0.027751629	0.670137501
DSC2	black	0.300791965	2.29E-06	-0.300791965	2.29E-06	-0.261428238	4.44E-05	-0.233955175	0.000271643	0.339994914	7.50E-08	0.26909616	2.58E-05	0.435474987	1.96E-12	0.166652084	0.010010022	0.643298565	3.39E-29	0.801005833	1.68E-54	0.417686135	1.82E-11	0.564510871	1.97E-21	-0.697541523	5.09E-36	-0.396625111	2.17E-10	-0.389414515	4.87E-10	0.159126943	0.013985093	0.047419598	0.466544948	0.022581569	0.728905702
SHTN1	black	0.466093228	3.08E-14	-0.466093228	3.08E-14	-0.36704798	5.29E-09	-0.418744896	1.60E-11	0.022344913	0.73163724	-0.146424519	0.023869392	0.151267906	0.019553213	0.261578517	4.40E-05	0.448996354	3.30E-13	0.80387465	3.63E-55	0.674961523	5.30E-33	0.565714611	1.56E-21	-0.528783148	1.51E-18	-0.146851541	0.02345837	-0.24846245	0.000107137	0.18558504	0.004066035	-0.100259224	0.122959496	0.067568431	0.299226393
ZNF57	black	0.401410472	1.25E-10	-0.401410472	1.25E-10	-0.01426519	0.826708375	-0.189311348	0.003370756	0.121109951	0.062121323	-0.181145408	0.005061564	0.121061286	0.062227162	0.228244903	0.000385785	0.448454425	3.55E-13	0.760235071	4.22E-46	0.647012386	1.28E-29	0.430770155	3.58E-12	-0.532875733	7.36E-19	-0.283016756	9.24E-06	-0.20510225	0.001465679	0.102600833	0.114408536	-0.471434614	1.43E-14	-0.005179132	0.936651128
ID4	black	0.369636612	4.05E-09	-0.369636612	4.05E-09	-0.101039419	0.120056989	-0.007476912	0.908649235	0.153303387	0.017952117	0.113550456	0.080428211	0.318784125	5.07E-07	0.153825051	0.017560627	0.432468899	2.89E-12	0.5978395	1.87E-24	0.495088411	4.03E-16	0.45256338	2.03E-13	-0.460611078	6.68E-14	-0.132043849	0.041823851	-0.102392662	0.115149368	0.121598345	0.06106733	-0.371385941	3.38E-09	-0.143779516	0.026556124
ZNRF3	black	0.376783929	1.91E-09	-0.376783929	1.91E-09	-0.330496798	1.80E-07	-0.103739962	0.110420459	0.157098305	0.015269757	-0.051484321	0.42917497	0.250543239	9.33E-05	0.177813815	0.005946991	0.445010858	5.62E-13	0.733664235	1.76E-41	0.616996741	2.33E-26	0.50902722	4.31E-17	-0.552217125	2.12E-20	-0.174434944	0.006984213	-0.212305326	0.000981789	0.134448414	0.038203121	-0.33443363	1.26E-07	-0.08093917	0.213449177
GBP6	black	0.274152646	1.79E-05	-0.274152646	1.79E-05	-0.199346074	0.001999912	-0.029747733	0.647950979	0.358794112	1.22E-08	-0.037581344	0.563987981	0.135372045	0.036884559	0.146811824	0.02349634	0.333428261	1.38E-07	0.696943107	6.17E-36	0.410571873	4.29E-11	0.40678941	6.71E-11	-0.58450936	3.33E-23	-0.292003849	4.62E-06	-0.396808487	2.12E-10	0.256520057	6.23E-05	-0.120824167	0.062744973	0.049898054	0.443548792
CLDN20	black	0.19366695	0.002695571	-0.19366695	0.002695571	-0.111519343	0.086027097	-0.071224271	0.273779565	0.228823591	0.000372457	-0.1280246	0.048518987	0.031797366	0.625488445	0.145764134	0.024517253	0.588777267	1.34E-23	0.581414373	6.38E-23	0.368367878	4.62E-09	0.181854104	0.004889239	-0.475006341	8.47E-15	-0.262779488	4.04E-05	-0.375908317	2.10E-09	0.063131223	0.332155578	-0.237339608	0.000219751	0.069792524	0.283564612
MEIS2	black	0.461896626	5.58E-14	-0.461896626	5.58E-14	-0.488019821	1.20E-15	-0.328639021	2.12E-07	0.000819375	0.989967537	-0.250286777	9.49E-05	0.032801496	0.614607053	0.153910526	0.017497196	0.361659653	9.15E-09	0.697019704	6.02E-36	0.628491383	1.45E-27	0.431128203	3.42E-12	-0.516917973	1.16E-17	-0.171920173	0.007857983	-0.142113194	0.028378768	0.349720223	2.98E-08	-0.083514441	0.199191362	-0.010130298	0.876455679
TGFBR3	black	0.340546215	7.13E-08	-0.340546215	7.13E-08	-0.12270327	0.058737066	-0.209819918	0.001129044	0.091926482	0.157449623	-0.191867238	0.002958072	0.07843957	0.227974016	0.232101247	0.000304699	0.564910545	1.83E-21	0.727640341	1.65E-40	0.585255096	2.85E-23	0.386156012	6.97E-10	-0.508392132	4.78E-17	-0.235443008	0.000247564	-0.31883075	5.05E-07	0.128944734	0.046912161	-0.352911231	2.18E-08	0.028622341	0.660422997
MTCL1	black	0.38541935	7.55E-10	-0.38541935	7.55E-10	-0.298946656	2.66E-06	-0.146851967	0.023457963	0.23555409	0.000245848	-0.087424585	0.178885304	0.1479321	0.022445459	0.265532071	3.33E-05	0.618744641	1.54E-26	0.794164721	5.82E-53	0.571431756	4.96E-22	0.406633645	6.83E-11	-0.611162968	9.14E-26	-0.266373334	3.14E-05	-0.376676794	1.94E-09	0.094627095	0.145553667	-0.311413716	9.52E-07	0.052493362	0.420173371
C3	black	-0.243461413	0.000148598	0.243461413	0.000148598	0.129966335	0.045180503	0.19036555	0.003194609	-0.130039815	0.045058044	-0.139394502	0.031582304	-0.291184387	4.93E-06	-0.002120648	0.974038585	-0.402537119	1.10E-10	-0.535261053	4.81E-19	-0.331323899	1.67E-07	-0.346561858	4.03E-08	0.423270402	9.18E-12	0.55531331	1.18E-20	0.299344214	2.58E-06	-0.145486292	0.024794318	0.040367209	0.535436263	-0.162012708	0.01232123
CWH43	black	0.384254456	8.58E-10	-0.384254456	8.58E-10	-0.195966779	0.002390954	-0.321223999	4.10E-07	0.248812786	0.000104683	0.067036762	0.30305369	0.274252169	1.78E-05	0.117489791	0.070408643	0.580315103	8.03E-23	0.816075775	4.05E-58	0.483183075	2.51E-15	0.566466626	1.34E-21	-0.665291738	8.63E-32	-0.355290868	1.73E-08	-0.394814076	2.66E-10	0.192935606	0.00279958	-0.04618336	0.478256497	0.076268332	0.241147328
MAP2	black	0.387878406	5.77E-10	-0.387878406	5.77E-10	-0.195308798	0.002474739	-0.275238885	1.65E-05	0.260350599	4.79E-05	-0.062532438	0.336770989	0.165049544	0.010760871	0.161688049	0.012499288	0.689020046	7.55E-35	0.830438526	6.87E-62	0.52828108	1.65E-18	0.473193346	1.11E-14	-0.669448832	2.64E-32	-0.352324107	2.31E-08	-0.369509883	4.10E-09	0.243773433	0.000145624	-0.104548042	0.107658141	0.039102235	0.548310596
CTTNBP2	black	0.384322915	8.51E-10	-0.384322915	8.51E-10	-0.09694972	0.135880606	-0.18710446	0.003768255	0.131434593	0.042785767	-0.1062023	0.102173043	0.218618712	0.000683528	0.199412392	0.001992858	0.51417026	1.84E-17	0.791812932	1.91E-52	0.662379655	1.96E-31	0.465724991	3.24E-14	-0.558749018	6.09E-21	-0.181990801	0.004856614	-0.293280123	4.18E-06	0.056329206	0.38697478	-0.424650034	7.74E-12	-0.024330243	0.708830042
TMEM176A	black	-0.413417181	3.05E-11	0.413417181	3.05E-11	0.077516613	0.233510146	0.474998734	8.48E-15	0.00299402	0.963352965	-0.01644878	0.800700598	-0.261600853	4.39E-05	-0.195860383	0.002404325	-0.320543764	4.35E-07	-0.631850975	6.29E-28	-0.452882735	1.95E-13	-0.420523872	1.29E-11	0.435980709	1.84E-12	0.338503872	8.62E-08	0.242987999	0.000153218	-0.294664563	3.75E-06	0.120683359	0.063054137	-0.137336963	0.034207173
ME1	black	0.534501798	5.51E-19	-0.534501798	5.51E-19	-0.448928939	3.33E-13	-0.52509719	2.87E-18	0.006063653	0.925860793	-0.15768953	0.014885101	0.17044111	0.008416172	0.087720119	0.17741514	0.442413991	7.93E-13	0.769172072	8.56E-48	0.591898348	6.86E-24	0.599599163	1.26E-24	-0.484985982	1.91E-15	-0.197707593	0.002181579	-0.20538167	0.001443427	0.280447952	1.12E-05	0.121512249	0.061252057	0.210856444	0.001065326
CCDC146	black	0.332053585	1.56E-07	-0.332053585	1.56E-07	-0.470174663	1.71E-14	-0.37180442	3.23E-09	-0.069323894	0.286817887	0.064618987	0.32086466	0.3490264	3.18E-08	0.226634909	0.000425231	0.162191999	0.012223858	0.65437848	1.78E-30	0.584053367	3.67E-23	0.64146364	5.46E-29	-0.466711357	2.82E-14	-0.060105892	0.355891725	-0.192525475	0.002859488	0.06612677	0.30967913	0.043561234	0.50361706	-0.088089065	0.175592357
FAM83B	black	0.394951351	2.62E-10	-0.394951351	2.62E-10	-0.251539617	8.73E-05	-0.28785408	6.38E-06	0.205447214	0.001438252	0.303700342	1.81E-06	0.591665437	7.21E-24	0.192671433	0.002838036	0.536403162	3.92E-19	0.79951066	3.68E-54	0.518829641	8.40E-18	0.71729991	6.70E-39	-0.652003019	3.38E-30	-0.363813198	7.36E-09	-0.210865117	0.001064807	0.111899588	0.084955769	-0.039558268	0.543651834	-0.040668706	0.532390256
DYNLT3	black	0.387844882	5.79E-10	-0.387844882	5.79E-10	-0.262486464	4.13E-05	-0.395569055	2.44E-10	0.142252803	0.028222056	0.011126774	0.864414795	0.313436997	8.02E-07	0.246225442	0.000124124	0.37749905	1.77E-09	0.860351492	5.08E-71	0.611463478	8.52E-26	0.723914118	6.39E-40	-0.725898823	3.12E-40	-0.241896232	0.000164389	-0.243643038	0.00014686	0.227616963	0.000400747	0.034564291	0.595707698	0.004689526	0.942628979
DSC3	black	0.378792443	1.55E-09	-0.378792443	1.55E-09	-0.359902941	1.09E-08	-0.302456567	2.00E-06	0.228383059	0.000382564	0.07951758	0.221626264	0.354119855	1.94E-08	0.237068748	0.000223536	0.651331353	4.05E-30	0.856241559	1.21E-69	0.539894875	2.09E-19	0.65715218	8.35E-31	-0.678335229	1.95E-33	-0.312966005	8.35E-07	-0.308361879	1.23E-06	0.153751685	0.017615232	0.012778376	0.844527742	0.05475542	0.400398801
ITGB2	black	-0.336078352	1.08E-07	0.336078352	1.08E-07	0.168189967	0.009333452	0.415791283	2.29E-11	-0.128785095	0.047187704	0.0712856	0.273365602	-0.071901277	0.269233473	0.034231991	0.599250179	-0.356831629	1.48E-08	-0.631095202	7.60E-28	-0.35723339	1.43E-08	-0.364170719	7.10E-09	0.521220671	5.60E-18	0.61805031	1.82E-26	0.461486895	5.91E-14	-0.203511169	0.001598485	-0.130356751	0.044533028	-0.240867022	0.000175613
STXBP5	black	0.599284242	1.36E-24	-0.599284242	1.36E-24	-0.394635761	2.72E-10	-0.413953102	2.86E-11	0.011932564	0.85470075	-0.039723472	0.54196898	0.34641296	4.09E-08	0.175574955	0.006617495	0.487470916	1.31E-15	0.889166241	4.33E-82	0.779664873	7.01E-50	0.696515306	7.08E-36	-0.570759295	5.68E-22	-0.207481363	0.001285861	-0.214938075	0.000845238	0.238651062	0.000202254	-0.20350208	0.001599275	0.096965035	0.135818501
MEIS1	black	0.355009349	1.78E-08	-0.355009349	1.78E-08	-0.269586723	2.49E-05	-0.105944896	0.103011708	0.321955773	3.84E-07	0.105785146	0.103534931	0.357725744	1.36E-08	0.211891447	0.001005015	0.503881049	9.95E-17	0.839348009	2.07E-64	0.578705371	1.12E-22	0.553545404	1.65E-20	-0.693823982	1.67E-35	-0.299205705	2.61E-06	-0.384021452	8.80E-10	0.066206029	0.309098315	-0.274561819	1.74E-05	0.02706242	0.677866147
CHL1	black	0.452810771	1.96E-13	-0.452810771	1.96E-13	-0.187511616	0.003691878	-0.20266027	0.001673942	0.142861115	0.027547845	0.09847499	0.129801749	0.373843182	2.61E-09	0.251581232	8.71E-05	0.46559214	3.31E-14	0.833828335	7.86E-63	0.689280682	6.96E-35	0.644882445	2.24E-29	-0.585502856	2.70E-23	-0.229663328	0.000353876	-0.285866012	7.44E-06	0.061530702	0.344583482	-0.33176648	1.60E-07	-0.025378469	0.69689048
TMPRSS11D	black	0.366401772	5.65E-09	-0.366401772	5.65E-09	-0.240260243	0.000182562	-0.387063738	6.31E-10	0.177089215	0.00615702	0.255413032	6.72E-05	0.523329336	3.90E-18	0.177688338	0.005982895	0.385283726	7.67E-10	0.774846803	6.58E-49	0.478702928	4.91E-15	0.727374972	1.82E-40	-0.609591485	1.31E-25	-0.223760707	0.00050509	-0.292292786	4.52E-06	0.095536182	0.141706993	0.078614112	0.226937604	0.030453255	0.640181607
DENND4C	black	0.454808393	1.49E-13	-0.454808393	1.49E-13	-0.455408973	1.38E-13	-0.370441492	3.73E-09	-0.01983502	0.760808929	-0.079586549	0.221224473	0.310933132	9.91E-07	0.229975217	0.000347197	0.329696529	1.93E-07	0.799143756	4.46E-54	0.69170275	3.26E-35	0.664425047	1.10E-31	-0.502032145	1.34E-16	-0.166316604	0.010163254	-0.186208268	0.003941416	0.26522273	3.40E-05	-0.097511492	0.133616781	0.043672015	0.502531519
SLC16A7	black	0.572714613	3.83E-22	-0.572714613	3.83E-22	-0.237267313	0.000220755	-0.345637565	4.40E-08	-0.002101898	0.974268038	0.050263076	0.44021719	0.436561339	1.70E-12	0.131254467	0.043073692	0.38476048	8.12E-10	0.753697051	6.55E-45	0.677070017	2.85E-33	0.676450117	3.42E-33	-0.48165396	3.16E-15	-0.169880229	0.00863689	-0.068268568	0.294235448	0.206352779	0.001368476	-0.212179878	0.000988776	0.13492127	0.037523187
LOC100129406	black	0.38365301	9.16E-10	-0.38365301	9.16E-10	-0.260622956	4.70E-05	-0.17953393	0.005473875	0.044265736	0.496734715	-0.258542554	5.43E-05	-0.009677538	0.881936168	0.1520077	0.018957507	0.321605462	3.96E-07	0.57005078	6.55E-22	0.538676051	2.60E-19	0.322790459	3.57E-07	-0.361040977	9.74E-09	-0.108414758	0.095185244	-0.08978723	0.167381245	0.372044519	3.15E-09	-0.265974624	3.23E-05	-0.024777154	0.703730705
HMGCS1	black	0.348177526	3.45E-08	-0.348177526	3.45E-08	-0.037392596	0.565948465	-0.250211811	9.54E-05	0.057880852	0.374010256	0.274105576	1.80E-05	0.537989197	2.95E-19	0.162213094	0.012212446	0.146833511	0.0234756	0.632175246	5.80E-28	0.497534225	2.74E-16	0.671888489	1.30E-32	-0.409109854	5.10E-11	-0.184099483	0.00437753	-0.203346619	0.00161283	-0.049892692	0.44359784	-0.161976178	0.012341152	-0.009244999	0.887177134
LBP	black	-0.172766752	0.007553538	0.172766752	0.007553538	-0.060438881	0.353228299	-0.016540777	0.79960946	-0.226194912	0.000436644	-0.168066694	0.009386149	-0.238414685	0.000205308	0.000342619	0.995804871	-0.348468179	3.36E-08	-0.484898358	1.94E-15	-0.32800892	2.25E-07	-0.264897507	3.48E-05	0.395921256	2.35E-10	0.441925793	8.46E-13	0.394667483	2.71E-10	0.005472452	0.933071519	0.286738401	6.96E-06	-0.042913822	0.509985508
COBL	black	0.203435884	0.001605034	-0.203435884	0.001605034	-0.126417386	0.05143577	0.095260752	0.142864151	0.46735363	2.57E-14	-0.016974622	0.794469032	0.088355196	0.174286172	0.159204107	0.013938158	0.711845395	4.42E-38	0.733531084	1.85E-41	0.425658077	6.82E-12	0.268771849	2.64E-05	-0.685511217	2.23E-34	-0.366899841	5.37E-09	-0.439006747	1.24E-12	0.014000188	0.829878193	-0.357797144	1.35E-08	-0.085823111	0.187008846
RRBP1	black	-0.35785381	1.34E-08	0.35785381	1.34E-08	0.167185547	0.00977057	0.441543625	8.90E-13	0.042849965	0.510615917	0.152793736	0.018341905	-0.01026482	0.87482847	-0.228326762	0.000383873	-0.308940229	1.17E-06	-0.579592311	9.33E-23	-0.51190107	2.68E-17	-0.396406394	2.22E-10	0.470845863	1.55E-14	0.064868467	0.318996001	0.037070156	0.569305069	0.175607479	0.00660729	0.066925254	0.303860482	-0.01920703	0.768162864
RAPH1	black	0.45463002	1.53E-13	-0.45463002	1.53E-13	-0.254867139	6.98E-05	-0.240539364	0.000179334	0.047883498	0.46219133	0.259819428	4.97E-05	0.565137757	1.74E-21	0.138689691	0.032461437	0.46250999	5.11E-14	0.762099771	1.90E-46	0.662644021	1.82E-31	0.716292618	9.52E-39	-0.500875723	1.61E-16	-0.307929012	1.27E-06	-0.133188456	0.040065855	0.047687103	0.464031708	-0.278539384	1.29E-05	-0.029594223	0.64964656
SOCS6	black	0.532361425	8.06E-19	-0.532361425	8.06E-19	-0.416080459	2.22E-11	-0.457378177	1.05E-13	0.014928854	0.818782366	-0.039567029	0.543562528	0.278998215	1.25E-05	0.1616825	0.01250235	0.481579537	3.20E-15	0.800332864	2.39E-54	0.64800818	9.84E-30	0.658993294	5.03E-31	-0.587830192	1.65E-23	-0.190506417	0.003171714	-0.168778297	0.009085545	0.171230019	0.008114206	0.023099437	0.722940303	-0.012354021	0.849628561
GALNT7	black	0.553242164	1.75E-20	-0.553242164	1.75E-20	-0.467725033	2.44E-14	-0.456630551	1.16E-13	-0.027964907	0.66775282	0.100554621	0.121854208	0.50743992	5.59E-17	0.24095574	0.000174618	0.423422171	9.01E-12	0.829548792	1.20E-61	0.710677211	6.59E-38	0.794762921	4.29E-53	-0.527122623	2.02E-18	-0.126748432	0.050823345	-0.14646147	0.023833583	0.21954019	0.000647784	0.011375654	0.861412224	0.022851211	0.725797599
SLK	black	0.464150769	4.06E-14	-0.464150769	4.06E-14	-0.443707699	6.68E-13	-0.482928682	2.61E-15	0.024190307	0.710429412	-0.085872839	0.186752596	0.287779059	6.42E-06	0.26986343	2.44E-05	0.355799127	1.64E-08	0.84912817	2.31E-67	0.673426947	8.31E-33	0.735128131	1.02E-41	-0.614871205	3.85E-26	-0.122141988	0.059911462	-0.243936233	0.000144095	0.307696347	1.30E-06	0.067325914	0.300968197	0.064916442	0.31863747
GNLY	black	-0.285614419	7.58E-06	0.285614419	7.58E-06	0.12726553	0.049878881	0.367422371	5.09E-09	-0.03654136	0.574830212	-0.033604369	0.605966676	-0.211422836	0.001031921	0.132393111	0.041280671	-0.308145496	1.25E-06	-0.506142688	6.90E-17	-0.302238541	2.04E-06	-0.416320998	2.15E-11	0.38016107	1.33E-09	0.474261114	9.45E-15	0.339509057	7.85E-08	-0.237313843	0.000220108	-0.107287578	0.09869624	-0.167366951	0.009690307
HMGCR	black	0.494853481	4.18E-16	-0.494853481	4.18E-16	-0.306734151	1.41E-06	-0.421865601	1.09E-11	0.143600089	0.02674743	0.09050816	0.16398334	0.387039423	6.32E-10	0.248690749	0.000105532	0.569400717	7.47E-22	0.903176869	1.21E-88	0.648846131	7.88E-30	0.696054772	8.21E-36	-0.672086013	1.23E-32	-0.270460763	2.34E-05	-0.295769369	3.43E-06	0.154656412	0.016952087	-0.100636939	0.121547579	0.056992745	0.381397693
SPRY2	black	0.374923293	2.33E-09	-0.374923293	2.33E-09	-0.373984642	2.57E-09	-0.075615617	0.245209585	0.018125148	0.780880438	-0.008327247	0.898313288	0.238343188	0.00020624	0.041537312	0.523663779	0.222408858	0.000547269	0.515075005	1.58E-17	0.51407851	1.87E-17	0.472331431	1.25E-14	-0.350538804	2.75E-08	-0.178732627	0.005689904	-0.118360681	0.068336924	0.078304824	0.228776414	-0.240405793	0.000180872	-0.013531193	0.835494804
NOTCH2NL	black	0.214329562	0.000875146	-0.214329562	0.000875146	-0.13338099	0.039776351	-0.357617713	1.37E-08	0.060532692	0.352480214	-0.287200817	6.71E-06	-0.113184167	0.081415582	0.240780785	0.000176585	0.197665624	0.002186424	0.427930385	5.13E-12	0.24652864	0.000121682	0.234486858	0.000262798	-0.380300582	1.32E-09	0.035916718	0.581389074	-0.154219532	0.017269542	0.301796124	2.11E-06	0.099812595	0.1246454	0.086498605	0.183549968
MLANA	black	0.108676551	0.094384194	-0.108676551	0.094384194	-0.185333665	0.004117296	0.0364643	0.575637474	0.146301655	0.023988797	-0.1473383	0.022997306	0.037535732	0.564461443	0.17852539	0.005747003	0.492092952	6.43E-16	0.383137593	9.68E-10	0.264485584	3.59E-05	0.136475744	0.035359634	-0.271377316	2.19E-05	0.016005702	0.805961175	-0.193942995	0.002657234	0.0964045	0.138105755	-0.221085657	0.000591689	-0.067720045	0.298140876
SLC25A43	black	0.503483413	1.06E-16	-0.503483413	1.06E-16	-0.386607502	6.63E-10	-0.476911562	6.40E-15	-0.069497193	0.285611925	-0.013928988	0.830730332	0.35245058	2.28E-08	0.216096271	0.000790902	0.428881147	4.55E-12	0.787659164	1.50E-51	0.665756452	7.57E-32	0.731375066	4.16E-41	-0.517312457	1.09E-17	-0.175914364	0.006511689	-0.14769807	0.022661574	0.227813751	0.000396001	-0.013454622	0.836412597	0.003247472	0.960253138
NDUFA3	black	-0.221111676	0.000590785	0.221111676	0.000590785	0.352042135	2.38E-08	0.338844282	8.35E-08	0.021611123	0.740128172	-0.049109345	0.45079611	-0.229680636	0.000353503	-0.208904398	0.001188216	-0.248269792	0.000108509	-0.50927299	4.14E-17	-0.367625253	4.99E-09	-0.480544323	3.73E-15	0.424531324	7.85E-12	0.107603826	0.097700964	0.096302464	0.138525265	-0.163133349	0.011723654	-0.152962479	0.018212041	0.036003617	0.580474541
RPS6KA5	black	0.406120954	7.25E-11	-0.406120954	7.25E-11	-0.596644121	2.43E-24	-0.463596719	4.39E-14	-0.028983604	0.656408906	-0.202945014	0.001648336	0.087046183	0.180780822	0.26016222	4.85E-05	0.441374664	9.10E-13	0.672585357	1.06E-32	0.530920964	1.04E-18	0.481201113	3.38E-15	-0.494033307	4.75E-16	-0.055320648	0.39554586	-0.205364328	0.001444799	0.251478626	8.77E-05	0.21839004	0.000692676	0.048825962	0.453416239
GPAT3	black	0.343954637	5.17E-08	-0.343954637	5.17E-08	-0.165242367	0.010667968	-0.375932	2.10E-09	0.048135677	0.45983416	-0.298591945	2.74E-06	-0.084599335	0.193396621	0.183058606	0.004608419	0.337850607	9.16E-08	0.541063801	1.69E-19	0.402134047	1.15E-10	0.32179729	3.90E-07	-0.392498996	3.45E-10	0.016987951	0.79431125	-0.107277481	0.098728149	0.325305205	2.86E-07	-0.015959969	0.806504656	0.136484798	0.035347348
MYO5B	black	0.308917786	1.17E-06	-0.308917786	1.17E-06	-0.151004791	0.019768964	-0.424189868	8.19E-12	0.044320125	0.496205463	-0.051532263	0.428744774	0.204164026	0.001542714	0.264810643	3.50E-05	0.310356813	1.04E-06	0.694020414	1.57E-35	0.51088952	3.17E-17	0.586673004	2.11E-23	-0.557384251	7.92E-21	-0.108301896	0.095532252	-0.152484128	0.018582274	0.110107097	0.09010132	0.035377824	0.587075361	-0.06453931	0.321462959
ZNF462	black	0.394707372	2.69E-10	-0.394707372	2.69E-10	-0.231929124	0.000307951	-0.190963459	0.003098451	0.182414336	0.004756767	-0.233363722	0.000281807	-0.000431802	0.9947129	0.17475885	0.006878218	0.325694167	2.76E-07	0.722154229	1.20E-39	0.576563161	1.74E-22	0.382481975	1.04E-09	-0.587519116	1.76E-23	-0.171476655	0.008021801	-0.275026518	1.68E-05	0.308807302	1.18E-06	-0.204758261	0.001493505	0.071464917	0.272157693
MAB21L3	black	0.215998292	0.000795371	-0.215998292	0.000795371	-0.051233293	0.431431549	0.024730992	0.704256813	0.257238213	5.94E-05	0.102985425	0.113049677	0.178860632	0.005654889	-0.04109894	0.528058764	0.21114925	0.001047935	0.411881297	3.67E-11	0.249254572	0.000101663	0.209095395	0.001175641	-0.356093427	1.60E-08	-0.291991052	4.62E-06	-0.209485961	0.001150308	0.277134828	1.44E-05	-0.170832194	0.008265253	0.10890635	0.093685476
SHROOM3	black	0.337941914	9.09E-08	-0.337941914	9.09E-08	-0.158374286	0.014450218	-0.245653772	0.000128853	0.159523665	0.013745253	-0.175390604	0.006675606	0.031223258	0.631746682	0.000908989	0.988870369	0.161650473	0.012520041	0.6179811	1.85E-26	0.455171554	1.42E-13	0.390869286	4.14E-10	-0.490044974	8.82E-16	-0.139366293	0.031617096	-0.23568843	0.000243789	0.047254573	0.468099108	-0.127171062	0.050050324	0.058792897	0.366515931
DKFZP586B0319	black	0.268555454	2.69E-05	-0.268555454	2.69E-05	-0.164456361	0.011051166	-0.245102181	0.000133575	0.00782675	0.904394938	-0.375759384	2.13E-09	-0.109189142	0.092831295	0.218400098	0.000692272	0.133238787	0.039990004	0.515858795	1.39E-17	0.461336751	6.03E-14	0.267469045	2.90E-05	-0.370926689	3.54E-09	-0.066512634	0.306858223	-0.143115606	0.027269908	0.374731049	2.38E-09	-0.133120137	0.040169009	0.167419595	0.009667125
KLHL13	black	0.344210435	5.05E-08	-0.344210435	5.05E-08	-0.335472446	1.14E-07	-0.257300119	5.91E-05	-0.026765143	0.681210241	-0.226145643	0.00043794	0.130480675	0.044329142	0.194426761	0.002591242	0.224343232	0.000487861	0.664587651	1.05E-31	0.637494123	1.51E-28	0.53297185	7.23E-19	-0.467181636	2.63E-14	-0.06857133	0.292094476	-0.027381583	0.674282872	0.178255284	0.005822196	-0.18993342	0.00326578	-0.142803174	0.027611462
TSPAN8	black	0.189122196	0.003403275	-0.189122196	0.003403275	0.03436896	0.597788883	-0.060761994	0.350655877	0.177563308	0.006018865	-0.018131617	0.780804214	0.123242211	0.057627354	0.157494306	0.015011167	0.239576184	0.000190703	0.536417928	3.91E-19	0.408399888	5.55E-11	0.319288757	4.85E-07	-0.469064245	2.01E-14	-0.075569173	0.245500441	-0.247969409	0.000110682	-0.03964785	0.542738978	-0.3300561	1.87E-07	-0.009554546	0.883425915
P2RY1	black	0.504109033	9.59E-17	-0.504109033	9.59E-17	-0.415193367	2.47E-11	-0.35598267	1.61E-08	0.139752508	0.031143578	0.026218589	0.687374689	0.316733781	6.05E-07	0.191092884	0.003077984	0.460619154	6.67E-14	0.84971675	1.51E-67	0.674700752	5.72E-33	0.617515051	2.06E-26	-0.63714149	1.66E-28	-0.273510254	1.88E-05	-0.308624785	1.20E-06	0.179128275	0.005582301	-0.046865268	0.471776753	0.115384004	0.075630047
PCDH7	black	0.150887922	0.019865457	-0.150887922	0.019865457	-0.301705165	2.13E-06	0.157602086	0.014941452	0.255052768	6.89E-05	-0.042335573	0.515708805	0.161950701	0.012355064	0.25798173	5.64E-05	0.383444531	9.37E-10	0.508400553	4.77E-17	0.378927034	1.52E-09	0.307840295	1.28E-06	-0.419601844	1.44E-11	-0.092898166	0.153087868	-0.126098854	0.052030826	0.048694286	0.454636604	-0.243946855	0.000143996	-0.040512118	0.533971162
PLP1	black	0.184112897	0.004374624	-0.184112897	0.004374624	0.012868987	0.84343941	-0.112028862	0.084593995	0.065320746	0.315626414	-0.204959733	0.001477149	-0.025790875	0.692213245	0.253508137	7.65E-05	0.474103561	9.67E-15	0.443824619	6.58E-13	0.366821254	5.42E-09	0.165789629	0.010408143	-0.299770598	2.49E-06	-0.046831129	0.472100008	-0.192023631	0.002934374	0.032436383	0.618554071	-0.32694406	2.47E-07	-0.049473729	0.447439601
TXN	black	0.246698668	0.000120332	-0.246698668	0.000120332	-0.237245019	0.000221066	-0.372368434	3.05E-09	0.042052765	0.518519951	-0.352782951	2.21E-08	-0.093508268	0.150396258	0.168005507	0.009412404	0.284441927	8.29E-06	0.414302267	2.75E-11	0.233674168	0.000276429	0.220645248	0.000607199	-0.339146477	8.12E-08	-0.092163098	0.156378965	-0.13801427	0.03332337	0.428575911	4.73E-12	0.177457382	0.00604949	0.099770209	0.12480632
CDCA7	black	0.516134198	1.32E-17	-0.516134198	1.32E-17	-0.325969787	2.70E-07	-0.262806756	4.04E-05	0.090001405	0.166366347	-0.112112273	0.084361229	0.208736875	0.001199347	0.242437119	0.000158762	0.604040916	4.67E-25	0.746696206	1.13E-43	0.631263932	7.28E-28	0.486943835	1.42E-15	-0.509156076	4.22E-17	-0.223610785	0.000509615	-0.213388345	0.00092333	0.183842361	0.004433575	-0.235258936	0.000250431	0.061709642	0.343179578
DAAM1	black	0.084146476	0.195800339	-0.084146476	0.195800339	-0.215148359	0.000835124	-0.300714069	2.31E-06	0.055551877	0.393570794	-0.113312928	0.081067386	0.025642447	0.693895282	0.134275718	0.038454027	0.164698181	0.010931998	0.416674586	2.06E-11	0.250429583	9.40E-05	0.296873438	3.14E-06	-0.354819482	1.81E-08	-0.101911589	0.116875726	-0.193779059	0.002679942	0.191289796	0.003047081	0.189312352	0.003370584	-0.050884364	0.434579525
RARRES2	black	-0.344301462	5.00E-08	0.344301462	5.00E-08	0.3730493	2.84E-09	0.335205827	1.17E-07	-0.041286922	0.526171831	-0.020848421	0.74898712	-0.340049281	7.47E-08	-0.114646228	0.077532038	-0.210437029	0.0010907	-0.645434839	1.94E-29	-0.453681125	1.74E-13	-0.578342527	1.21E-22	0.499088234	2.14E-16	0.349854779	2.94E-08	0.170404834	0.008430295	-0.183370795	0.004538044	-0.06855577	0.292204253	-0.106873762	0.100010704
MATR3	black	0.238923017	0.000198792	-0.238923017	0.000198792	-0.231656134	0.000313174	-0.12631459	0.051627184	0.089573023	0.168400906	-0.268452697	2.70E-05	-0.170135778	0.008535697	0.046977047	0.470719194	0.271948413	2.10E-05	0.326783698	2.51E-07	0.240381489	0.000181153	0.032059013	0.622645119	-0.254100989	7.35E-05	-0.194004539	0.002648755	-0.117832563	0.06958721	0.357200573	1.43E-08	-0.046998926	0.470512348	0.092129958	0.156528588
MAL2	black	0.421518328	1.14E-11	-0.421518328	1.14E-11	-0.390163312	4.48E-10	-0.473607182	1.04E-14	0.045694802	0.482928501	-0.014527345	0.823575359	0.295986462	3.37E-06	0.160875211	0.012955051	0.301327041	2.19E-06	0.767081172	2.16E-47	0.551863563	2.27E-20	0.700410358	2.01E-36	-0.539435534	2.27E-19	-0.177202501	0.006123752	-0.247138912	0.000116903	0.296239236	3.30E-06	0.140790936	0.029900298	0.119144872	0.06651431
LANCL3	black	0.474955799	8.54E-15	-0.474955799	8.54E-15	-0.500101656	1.82E-16	-0.448061783	3.74E-13	0.009135195	0.888508399	-0.164477133	0.011040884	0.125662466	0.052855329	0.223293617	0.000519311	0.343205951	5.55E-08	0.717763706	5.69E-39	0.601240072	8.76E-25	0.558497283	6.39E-21	-0.551139983	2.60E-20	-0.143476698	0.026879675	-0.137247386	0.034325536	0.189013188	0.003422145	0.056344641	0.386844492	-0.022747132	0.726996762
PAX9	black	0.132482054	0.041143298	-0.132482054	0.041143298	-0.070695309	0.277367618	0.045622914	0.483618028	0.317887102	5.48E-07	0.235301007	0.000249773	0.300443722	2.36E-06	0.010873845	0.867468203	0.107786615	0.097129346	0.52441619	3.23E-18	0.319745177	4.66E-07	0.409157019	5.07E-11	-0.473330643	1.08E-14	-0.200385769	0.001891904	-0.245581717	0.00012946	-0.068489912	0.292669194	-0.184502294	0.004291011	-0.074111024	0.254754621
ELOVL7	black	0.380471267	1.29E-09	-0.380471267	1.29E-09	-0.115262697	0.075940152	-0.382679145	1.02E-09	-0.063139104	0.332095106	-0.086847884	0.181780053	0.286974443	6.83E-06	0.238516642	0.000203986	0.320511702	4.36E-07	0.640901117	6.32E-29	0.551228842	2.56E-20	0.669207343	2.83E-32	-0.41061793	4.27E-11	-0.042936187	0.509764813	-0.018590733	0.775400103	0.129782776	0.045487637	-0.132424561	0.041232053	-0.183639716	0.0044782
RUNX1.IT1	black	-0.295729811	3.44E-06	0.295729811	3.44E-06	0.253155209	7.83E-05	0.14796059	0.022419273	-0.065085738	0.317374373	0.091234747	0.160611288	-0.172569354	0.007623571	-0.044029373	0.499038204	-0.462638829	5.02E-14	-0.546532046	6.17E-20	-0.442163001	8.20E-13	-0.391754828	3.75E-10	0.370937851	3.54E-09	0.27211462	2.08E-05	0.168919904	0.009026755	-0.011837614	0.855844302	0.087667974	0.177673893	-0.077440423	0.233971352
GPSM2	black	0.413212756	3.13E-11	-0.413212756	3.13E-11	-0.304483198	1.70E-06	-0.280498449	1.12E-05	0.195193122	0.002489742	0.056233505	0.387783219	0.389811532	4.66E-10	0.203209728	0.001624854	0.501798693	1.39E-16	0.860763648	3.68E-71	0.614610507	4.09E-26	0.641172327	5.89E-29	-0.645439496	1.94E-29	-0.352474083	2.28E-08	-0.407768454	5.98E-11	0.240374704	0.000181232	-0.122220668	0.059745678	0.114689865	0.077418474
AKR1B10	black	0.311754727	9.25E-07	-0.311754727	9.25E-07	-0.039819223	0.540994792	-0.201321369	0.001799289	0.162273087	0.012180043	0.18965074	0.003313111	0.338165704	8.90E-08	0.120886345	0.062608851	0.490125803	8.71E-16	0.576388742	1.81E-22	0.359367007	1.15E-08	0.485846857	1.68E-15	-0.448108518	3.71E-13	-0.305491783	1.56E-06	-0.145319488	0.024961946	-0.044360061	0.495817048	-0.104674338	0.107231371	0.086525203	0.183414739
ABHD5	black	0.55703398	8.47E-21	-0.55703398	8.47E-21	-0.348698241	3.28E-08	-0.470686945	1.59E-14	-0.007976833	0.902570642	0.068687406	0.291276411	0.469342655	1.93E-14	0.218259897	0.000697933	0.495248446	3.93E-16	0.870694828	1.10E-74	0.723679203	6.96E-40	0.792386435	1.43E-52	-0.580638586	7.50E-23	-0.240924465	0.000174968	-0.157921949	0.014736226	0.211862818	0.00100664	-0.054490808	0.402682882	0.039303543	0.546251648
SIPA1L2	black	0.34138972	6.58E-08	-0.34138972	6.58E-08	-0.10493405	0.106357955	0.007077016	0.913515451	0.268949396	2.61E-05	0.077541929	0.233357041	0.307795953	1.29E-06	0.183314366	0.004550693	0.43918257	1.21E-12	0.731449458	4.04E-41	0.5472057	5.44E-20	0.482423196	2.82E-15	-0.593286855	5.07E-24	-0.283668794	8.80E-06	-0.23453051	0.000262084	0.133044328	0.040283735	-0.439897915	1.10E-12	0.001679297	0.979440351
EEA1	black	0.49911901	2.13E-16	-0.49911901	2.13E-16	-0.341924217	6.26E-08	-0.184160417	0.004364342	0.070916049	0.275866443	0.220566544	0.00061001	0.528908632	1.48E-18	0.145420505	0.024860313	0.305342476	1.58E-06	0.658689477	5.47E-31	0.589452453	1.16E-23	0.59929458	1.35E-24	-0.413669446	2.96E-11	-0.247354262	0.000115259	-0.177925409	0.005915221	0.058456638	0.369268097	-0.165143176	0.01071567	0.093295238	0.15133199
HOOK1	black	0.368137597	4.73E-09	-0.368137597	4.73E-09	0.019985058	0.759055079	-0.242829565	0.000154793	0.097194509	0.134890567	0.042961242	0.509517631	0.366696841	5.48E-09	0.223097811	0.000525382	0.404787391	8.48E-11	0.726355158	2.64E-40	0.573291689	3.40E-22	0.531857716	8.81E-19	-0.464288959	3.98E-14	-0.292278775	4.52E-06	-0.272801256	1.98E-05	0.14094916	0.029714634	-0.373684182	2.66E-09	0.162397031	0.012113338
TMEM14A	black	0.407607921	6.09E-11	-0.407607921	6.09E-11	-0.308146861	1.25E-06	-0.277090943	1.44E-05	0.149292388	0.021224224	0.060505168	0.352699602	0.312814851	8.45E-07	0.165548498	0.010521928	0.609072225	1.48E-25	0.79608224	2.18E-53	0.590271707	9.74E-24	0.546304299	6.43E-20	-0.61656839	2.58E-26	-0.319571214	4.73E-07	-0.33234706	1.52E-07	0.028999459	0.656232959	-0.121277955	0.061757084	0.012689423	0.845596442
APLNR	black	-0.277308256	1.42E-05	0.277308256	1.42E-05	0.151855221	0.019078982	0.244823455	0.000136022	-0.129419433	0.046100744	-0.198213285	0.002123968	-0.41786834	1.78E-11	-0.290471346	5.21E-06	-0.340261091	7.32E-08	-0.643249653	3.44E-29	-0.428878282	4.55E-12	-0.553878839	1.55E-20	0.508929325	4.38E-17	0.15066446	0.020051094	0.273958906	1.82E-05	-0.077640218	0.232763288	0.075453708	0.246224587	0.042484012	0.514236463
WASF1	black	0.457181635	1.08E-13	-0.457181635	1.08E-13	-0.354506766	1.87E-08	-0.238890711	0.000199201	0.026095071	0.688770708	-0.077348121	0.234530944	0.204977924	0.001475681	0.194127655	0.002631866	0.319921226	4.59E-07	0.71293137	3.05E-38	0.661337767	2.62E-31	0.609843016	1.24E-25	-0.500602901	1.68E-16	-0.132670713	0.040853185	-0.076579384	0.239228115	0.111365293	0.086464203	-0.185305601	0.004123055	-0.096474464	0.137818667
ANKRD6	black	0.395198313	2.55E-10	-0.395198313	2.55E-10	-0.183249756	0.004565214	-0.097335399	0.13432326	0.16735761	0.009694426	-0.033655046	0.60542312	0.285326298	7.75E-06	0.170556948	0.008371217	0.525967002	2.47E-18	0.808090508	3.66E-56	0.686822942	1.49E-34	0.543296254	1.12E-19	-0.576620854	1.72E-22	-0.311249824	9.65E-07	-0.289096667	5.80E-06	0.04018497	0.537281633	-0.463798084	4.26E-14	-0.035055812	0.590485323
HLA.DRB1	black	-0.347582768	3.66E-08	0.347582768	3.66E-08	0.219035634	0.000667136	0.233555991	0.000278465	-0.0966609	0.137055885	-0.040663436	0.532443419	-0.212354092	0.000979085	0.201598879	0.001772625	-0.37604994	2.07E-09	-0.53882861	2.53E-19	-0.356335285	1.56E-08	-0.371842259	3.22E-09	0.352816182	2.20E-08	0.629025135	1.27E-27	0.239259525	0.000194586	-0.052039246	0.424210798	0.027585714	0.671994908	-0.222507143	0.000544095
PPP2R3A	black	0.379207481	1.48E-09	-0.379207481	1.48E-09	-0.476083377	7.23E-15	-0.491403567	7.15E-16	0.034588046	0.595454826	0.017275886	0.790904696	0.390337134	4.39E-10	0.224997709	0.000469154	0.413373251	3.07E-11	0.717449572	6.36E-39	0.472831225	1.16E-14	0.627441949	1.88E-27	-0.539070943	2.42E-19	-0.172845896	0.007525621	-0.223952007	0.000499371	0.366729198	5.47E-09	0.227146325	0.000412313	0.067910302	0.296782388
CHMP4C	black	0.363099188	7.91E-09	-0.363099188	7.91E-09	-0.231424607	0.000317669	-0.255428683	6.72E-05	0.21348184	0.000918436	0.010503689	0.871940343	0.243970509	0.000143775	0.189406167	0.00335456	0.482387744	2.83E-15	0.77091215	3.93E-48	0.51648136	1.25E-17	0.502675795	1.21E-16	-0.596263121	2.64E-24	-0.211886657	0.001005286	-0.367193474	5.21E-09	0.1111603	0.087048617	-0.134764135	0.037747992	0.056093189	0.388970379
TPRG1	black	0.247434423	0.000114653	-0.247434423	0.000114653	0.109360443	0.092316904	-0.237469656	0.000217954	0.196415154	0.002335346	-0.025159401	0.699379674	0.119348563	0.066047457	0.127170006	0.050052243	0.245227862	0.000132485	0.501091373	1.56E-16	0.283028811	9.23E-06	0.357835745	1.34E-08	-0.411095286	4.03E-11	-0.044209202	0.497285157	-0.238356662	0.000206064	-0.036300556	0.577354573	-0.083749234	0.197926694	0.096801004	0.136484797
OSBPL1A	black	0.318993724	4.98E-07	-0.318993724	4.98E-07	-0.122380653	0.059409749	-0.106290169	0.101887988	0.264527952	3.58E-05	-0.082285605	0.205906025	0.170726638	0.008305748	0.178105862	0.005864169	0.479989795	4.05E-15	0.71259789	3.42E-38	0.488455811	1.13E-15	0.397845209	1.89E-10	-0.582352654	5.24E-23	-0.238410534	0.000205362	-0.360129605	1.07E-08	0.389704712	4.71E-10	-0.255951261	6.48E-05	0.02958251	0.649776012
ZDHHC21	black	0.575386408	2.22E-22	-0.575386408	2.22E-22	-0.352601114	2.25E-08	-0.319391191	4.81E-07	0.000280963	0.996559797	0.158008287	0.014681255	0.499525849	2.00E-16	0.103287134	0.111992536	0.308762414	1.19E-06	0.739192642	2.15E-42	0.691166575	3.86E-35	0.68417866	3.36E-34	-0.444097232	6.35E-13	-0.257052654	6.01E-05	-0.194999452	0.002515045	0.149767121	0.020811773	-0.147857895	0.02251379	0.123376953	0.057352634
C11orf45	black	0.238857347	0.000199623	-0.238857347	0.000199623	-0.134062865	0.038765191	0.014012903	0.829726044	0.30759437	1.31E-06	-0.053725657	0.409331024	0.109924679	0.090638651	0.186114865	0.00395987	0.540617586	1.83E-19	0.659769049	4.06E-31	0.442386427	7.96E-13	0.28317726	9.13E-06	-0.569485675	7.34E-22	-0.260950555	4.59E-05	-0.410407182	4.38E-11	0.067472305	0.299915985	-0.347406186	3.72E-08	0.058382815	0.369874015
PLXDC2	black	0.513184174	2.17E-17	-0.513184174	2.17E-17	-0.33867271	8.49E-08	-0.304642412	1.67E-06	0.027425071	0.673795195	-0.335075765	1.18E-07	0.05252005	0.419936794	0.115434144	0.07550217	0.457733296	9.98E-14	0.728760987	1.09E-40	0.63091939	7.94E-28	0.405113869	8.16E-11	-0.452186054	2.14E-13	-0.225447684	0.000456681	-0.178493891	0.005755727	0.487106224	1.38E-15	-0.273555335	1.87E-05	0.138768864	0.032361654
WNT2B	black	0.340572835	7.11E-08	-0.340572835	7.11E-08	-0.156777147	0.015482328	-0.051603306	0.428107755	0.17874248	0.005687201	-0.077526842	0.233448275	0.159210327	0.01393438	0.183147198	0.00458835	0.417149693	1.95E-11	0.696216503	7.79E-36	0.567410659	1.11E-21	0.383622546	9.19E-10	-0.516644012	1.22E-17	-0.243811475	0.000145266	-0.343924695	5.18E-08	0.033576064	0.606270371	-0.443100756	7.24E-13	0.03524024	0.588531205
WDR41	black	0.432694099	2.80E-12	-0.432694099	2.80E-12	0.013802233	0.832247836	-0.366205364	5.77E-09	-0.033681526	0.605139179	-0.171712111	0.007934458	0.137068656	0.034562743	0.187079263	0.003773028	0.242012811	0.000163161	0.633435847	4.23E-28	0.564933236	1.82E-21	0.431876249	3.11E-12	-0.420670817	1.27E-11	-0.184859486	0.004215582	-0.164585709	0.010987282	0.13280704	0.04064462	-0.298777792	2.70E-06	0.1295485	0.045882169
NAXE	black	-0.30877767	1.19E-06	0.30877767	1.19E-06	0.111824045	0.085167751	0.255572452	6.65E-05	-0.070080807	0.281575703	0.014904452	0.819073466	-0.316019023	6.43E-07	-0.37909121	1.50E-09	-0.279281579	1.22E-05	-0.695461649	9.92E-36	-0.538327502	2.77E-19	-0.661035311	2.85E-31	0.568062711	9.76E-22	0.044853376	0.491032346	0.147425363	0.022915669	-0.176916184	0.006208146	0.152124825	0.018864655	0.169311886	0.008865774
C12orf29	black	0.597368495	2.07E-24	-0.597368495	2.07E-24	-0.36486008	6.62E-09	-0.526208373	2.37E-18	-0.05042746	0.4387215	0.025288707	0.69791002	0.465569399	3.32E-14	0.166072135	0.010276219	0.510698179	3.27E-17	0.853589473	8.84E-69	0.718106455	5.05E-39	0.78728045	1.81E-51	-0.546152797	6.62E-20	-0.222827198	0.00053388	-0.170942498	0.008223124	0.153806496	0.017574424	-0.031554105	0.628136943	0.111041155	0.087389742
PTPRCAP	black	-0.478391309	5.14E-15	0.478391309	5.14E-15	0.506804483	6.19E-17	0.427478973	5.43E-12	-0.007802182	0.904693618	0.073548036	0.258391339	-0.312461345	8.71E-07	-0.11114682	0.087087158	-0.389092269	5.04E-10	-0.773709156	1.11E-48	-0.591108479	8.13E-24	-0.648122443	9.55E-30	0.569935129	6.71E-22	0.42057685	1.28E-11	0.167233445	0.00974932	-0.303687475	1.81E-06	-0.008307424	0.898554049	-0.080880333	0.213783263
PLD1	black	0.328073651	2.23E-07	-0.328073651	2.23E-07	-0.132172777	0.041622644	-0.149738144	0.020836748	0.181603632	0.004949531	0.226816593	0.000420599	0.551447138	2.46E-20	0.249009574	0.000103328	0.325769133	2.74E-07	0.724739224	4.75E-40	0.558814107	6.01E-21	0.611412212	8.63E-26	-0.551279677	2.54E-20	-0.17845001	0.0057679	-0.226676532	0.000424165	0.041824228	0.520797369	-0.337590966	9.39E-08	0.023071952	0.723256493
MAN2B1	black	-0.469801801	1.81E-14	0.469801801	1.81E-14	0.288291736	6.17E-06	0.5508608	2.74E-20	0.095793012	0.140634437	-0.145425276	0.024855522	-0.47888783	4.78E-15	-0.2669711	3.01E-05	-0.367741856	4.93E-09	-0.765437674	4.46E-47	-0.626310926	2.48E-27	-0.725045887	4.25E-40	0.536294714	4.00E-19	0.244772405	0.000136475	0.150266198	0.020385675	-0.167129463	0.009795503	0.029447596	0.651267807	0.038536652	0.554115595
F8	black	0.398070499	1.84E-10	-0.398070499	1.84E-10	-0.509288448	4.13E-17	-0.466601774	2.86E-14	-0.123681803	0.056735082	-0.183915801	0.004417502	0.118970795	0.066915424	0.248405001	0.000107544	0.254641677	7.08E-05	0.6033563	5.45E-25	0.541676811	1.51E-19	0.534700016	5.32E-19	-0.415747959	2.31E-11	0.0631285	0.332176475	-0.106850642	0.10008455	0.171919022	0.007858405	0.172221597	0.007748356	-0.025851806	0.691523189
TMEM117	black	0.45052638	2.68E-13	-0.45052638	2.68E-13	-0.080953561	0.213367519	-0.396629826	2.17E-10	0.000957642	0.988274713	-0.15755154	0.014974111	0.230200844	0.000342439	0.171673459	0.007948738	0.433513481	2.52E-12	0.762267942	1.76E-46	0.654244965	1.85E-30	0.552509239	2.01E-20	-0.481886759	3.05E-15	-0.229078763	0.000366717	-0.143774132	0.026561847	0.060252443	0.354717985	-0.283973194	8.59E-06	0.147563175	0.022786957
SOWAHC	black	0.317883229	5.48E-07	-0.317883229	5.48E-07	-0.225765537	0.000448056	-0.293698026	4.04E-06	0.199119698	0.002024161	-0.082851308	0.20279486	0.14992427	0.020676779	0.225356864	0.000459173	0.440581114	1.01E-12	0.777912544	1.59E-49	0.505303162	7.91E-17	0.487689205	1.27E-15	-0.599764608	1.22E-24	-0.227648095	0.000399993	-0.246657331	0.000120659	0.275064569	1.67E-05	-0.127379411	0.049672859	0.002990051	0.963401502
HIST2H2BE	black	0.223855061	0.000502262	-0.223855061	0.000502262	-0.323392454	3.39E-07	-0.132118257	0.041707629	0.202344554	0.001702758	0.125485855	0.053192084	0.185632982	0.004056324	0.119684491	0.065283385	0.515140526	1.56E-17	0.487083303	1.39E-15	0.24808019	0.000109876	0.287999583	6.31E-06	-0.409304466	4.99E-11	-0.291761489	4.71E-06	-0.253070346	7.88E-05	-0.089559593	0.168464992	0.071810974	0.269836866	0.045276729	0.486945948
C7orf73	black	0.431053784	3.46E-12	-0.431053784	3.46E-12	-0.22427311	0.000489906	-0.300673628	2.31E-06	0.126310778	0.051634293	0.004510561	0.944814873	0.183699535	0.004464985	0.074177314	0.254328748	0.360702831	1.01E-08	0.702023861	1.19E-36	0.5472087	5.44E-20	0.453164656	1.87E-13	-0.554540117	1.37E-20	-0.303822494	1.79E-06	-0.251991898	8.47E-05	0.090463782	0.164190996	-0.17180032	0.007901956	0.099990597	0.123971353
ELOVL6	black	0.391762619	3.75E-10	-0.391762619	3.75E-10	-0.119804367	0.065012485	-0.138342399	0.032902231	0.192365373	0.002883188	0.089689892	0.167844016	0.355234177	1.74E-08	0.108619474	0.094558384	0.32258694	3.64E-07	0.740558228	1.26E-42	0.58974412	1.09E-23	0.551674941	2.35E-20	-0.515141863	1.56E-17	-0.236742032	0.000228183	-0.268531668	2.69E-05	0.057928181	0.373619046	-0.344746119	4.80E-08	0.054549935	0.402171834
GALNT12	black	0.293736794	4.03E-06	-0.293736794	4.03E-06	-0.141655005	0.028898329	-0.022296288	0.732198899	0.297758564	2.93E-06	0.19818028	0.002127685	0.413516805	3.02E-11	0.034260802	0.598942672	0.362386	8.51E-09	0.718612048	4.23E-39	0.477689222	5.71E-15	0.523179708	4.00E-18	-0.555552239	1.13E-20	-0.293085684	4.24E-06	-0.350927899	2.65E-08	-0.116237161	0.073477964	-0.270632053	2.31E-05	0.073140811	0.261044062
SLC16A6	black	0.413636173	2.98E-11	-0.413636173	2.98E-11	-0.072720525	0.263801425	-0.212619772	0.000964474	0.125415615	0.053326509	-0.018412954	0.777491418	0.286315845	7.19E-06	0.074997875	0.249097893	0.378563349	1.58E-09	0.699003464	3.18E-36	0.530017651	1.22E-18	0.452846655	1.95E-13	-0.395257522	2.53E-10	-0.232903266	0.000289964	-0.319271364	4.86E-07	0.278437094	1.30E-05	-0.275113484	1.67E-05	0.268640965	2.67E-05
MMP27	black	0.292473955	4.45E-06	-0.292473955	4.45E-06	-0.274699806	1.72E-05	-0.096065311	0.139504067	0.135175576	0.037161762	-0.083860922	0.197327164	0.171988633	0.007832964	0.257776468	5.72E-05	0.552054399	2.19E-20	0.602908104	6.03E-25	0.474852871	8.67E-15	0.355651958	1.67E-08	-0.471810031	1.35E-14	-0.124628667	0.054851934	-0.194800623	0.002541265	-0.018179821	0.780236319	-0.238144034	0.000208858	-0.048037712	0.460749066
TYROBP	black	-0.273671434	1.85E-05	0.273671434	1.85E-05	0.464259367	3.99E-14	0.222171805	0.000554992	-0.084410443	0.194396603	0.009683957	0.881858422	-0.13072517	0.043929183	0.101267881	0.119217228	-0.222259753	0.000552115	-0.529736399	1.28E-18	-0.359638709	1.12E-08	-0.36042377	1.04E-08	0.348113168	3.48E-08	0.455335776	1.39E-13	0.496436835	3.26E-16	-0.171912442	0.007860813	-0.123058667	0.058003321	-0.148897255	0.021572895
MSMO1	black	0.432924059	2.72E-12	-0.432924059	2.72E-12	-0.198428045	0.002099923	-0.410759075	4.20E-11	-0.024521379	0.706647543	-0.144779673	0.025511129	0.109924416	0.090639429	0.064102388	0.324756656	0.103395541	0.111614593	0.615021031	3.71E-26	0.537764888	3.07E-19	0.530528627	1.11E-18	-0.403078023	1.03E-10	-0.122694771	0.058754705	-0.156646197	0.015569743	0.141536214	0.029034352	-0.033981019	0.601931937	0.120333524	0.063827668
ADAM23	black	0.250241948	9.52E-05	-0.250241948	9.52E-05	-0.096809161	0.136451606	0.011164547	0.863958965	0.303427561	1.85E-06	0.1201621	0.064209541	0.232702959	0.000293581	0.071507111	0.27187399	0.385989072	7.10E-10	0.636296035	2.05E-28	0.452669972	2.00E-13	0.413091987	3.18E-11	-0.543134188	1.15E-19	-0.308079763	1.26E-06	-0.209048766	0.0011787	-0.033427	0.607870833	-0.324389538	3.10E-07	0.086422712	0.183936212
TMEM237	black	0.44931831	3.16E-13	-0.44931831	3.16E-13	-0.293094941	4.24E-06	-0.289467745	5.63E-06	0.113221053	0.081315709	-0.016311337	0.80233149	0.341909394	6.27E-08	0.270568289	2.32E-05	0.492736247	5.81E-16	0.881867178	5.13E-79	0.715050803	1.47E-38	0.667549583	4.54E-32	-0.657248543	8.13E-31	-0.232292989	0.000301114	-0.31613533	6.37E-07	0.052236898	0.422450764	-0.274064035	1.80E-05	-0.030255399	0.642356537
VSNL1	black	0.329473176	1.97E-07	-0.329473176	1.97E-07	-0.108166281	0.095950546	-0.340571738	7.11E-08	0.093664635	0.149712215	0.150231827	0.020414775	0.499387003	2.04E-16	0.355817462	1.64E-08	0.366709818	5.48E-09	0.769993139	5.93E-48	0.558630661	6.23E-21	0.727381568	1.82E-40	-0.598892682	1.48E-24	-0.18530368	0.00412345	-0.223824501	0.000503177	0.075911701	0.24336099	-0.133252767	0.039968957	-0.149270537	0.021243378
GPD1L	black	0.366796732	5.43E-09	-0.366796732	5.43E-09	-0.246249417	0.000123929	-0.112266116	0.083933263	0.122783485	0.058570789	0.010028427	0.877688283	0.296233776	3.31E-06	0.114816095	0.077090724	0.151001415	0.019771746	0.659734747	4.10E-31	0.569495628	7.33E-22	0.52988661	1.25E-18	-0.440393629	1.03E-12	-0.133789883	0.039167363	-0.271493941	2.17E-05	-0.045098174	0.48866722	-0.281108138	1.07E-05	0.056501291	0.385523671
OCLN	black	0.418509248	1.65E-11	-0.418509248	1.65E-11	-0.343612721	5.34E-08	-0.356640798	1.51E-08	0.128823333	0.047121582	0.136544132	0.035266931	0.412445049	3.43E-11	0.210062391	0.001113833	0.526445939	2.28E-18	0.820921914	2.36E-59	0.599300549	1.35E-24	0.702665445	9.61E-37	-0.623844164	4.52E-27	-0.20978567	0.001131208	-0.292800039	4.34E-06	0.03456477	0.595702607	-0.014824987	0.820021633	-0.144904624	0.025383094
IFITM2	black	-0.364842983	6.63E-09	0.364842983	6.63E-09	0.143569223	0.026780458	0.333102486	1.42E-07	-0.066615009	0.306112643	0.198007392	0.002147255	-0.137647828	0.03379909	-0.031926001	0.624089872	-0.28909477	5.80E-06	-0.658204087	6.25E-31	-0.472718394	1.18E-14	-0.474529418	9.09E-15	0.449232158	3.19E-13	0.258489181	5.45E-05	0.369182795	4.25E-09	-0.260565956	4.72E-05	0.083667876	0.198364252	-0.245971836	0.000126201
SC5D	black	0.407094933	6.47E-11	-0.407094933	6.47E-11	-0.37959334	1.42E-09	-0.339076768	8.18E-08	0.033714929	0.604781096	0.264317599	3.63E-05	0.619928787	1.16E-26	0.182377007	0.004765492	0.235450712	0.000247445	0.71728723	6.73E-39	0.55466329	1.33E-20	0.774362345	8.21E-49	-0.53223135	8.25E-19	-0.166482437	0.010087252	-0.178854354	0.005656602	0.021647007	0.739712213	0.042600828	0.513079304	0.034017531	0.601541452
RGS17	black	0.290682725	5.12E-06	-0.290682725	5.12E-06	-0.311158973	9.72E-07	-0.247134434	0.000116938	0.045352536	0.486216157	0.005877164	0.928134727	0.294588048	3.77E-06	0.133990567	0.038871364	0.301874666	2.10E-06	0.548833247	4.02E-20	0.408628078	5.40E-11	0.448778895	3.39E-13	-0.342927804	5.70E-08	-0.051932124	0.425166468	-0.144704249	0.025588682	0.071760527	0.270174346	-0.115360864	0.07568912	0.045425769	0.485511709
FAM98B	black	0.313283432	8.12E-07	-0.313283432	8.12E-07	-0.503180137	1.11E-16	-0.37171609	3.26E-09	-0.022785574	0.726553764	-0.18352473	0.004503701	0.05136461	0.430250246	0.119318539	0.066116102	0.210294346	0.001099457	0.533854209	6.18E-19	0.437145397	1.58E-12	0.43757972	1.49E-12	-0.433845676	2.42E-12	-0.05866572	0.367555338	-0.086241489	0.184860942	0.523202509	3.99E-18	0.310353099	1.04E-06	0.058545992	0.368535525
HYMAI	black	0.245596985	0.000129331	-0.245596985	0.000129331	0.002385266	0.97080043	-0.253963063	7.42E-05	0.012574412	0.846978633	-0.219956143	0.000632222	-0.132538034	0.041057034	0.11595351	0.07418788	0.166304827	0.010168671	0.33710746	9.82E-08	0.281928684	1.00E-05	0.131666508	0.042417442	-0.263510773	3.84E-05	0.031731711	0.626202797	-0.047476798	0.466006919	0.220711595	0.000604838	-0.123745018	0.056607715	-0.100705864	0.121291298
HCK	black	-0.353445375	2.07E-08	0.353445375	2.07E-08	0.379053634	1.50E-09	0.383398554	9.41E-10	-0.096231484	0.138817669	0.031233141	0.631638725	-0.175888379	0.006519735	-0.005259457	0.935670735	-0.370376004	3.75E-09	-0.651139469	4.27E-30	-0.397304048	2.01E-10	-0.390563877	4.28E-10	0.491970549	6.55E-16	0.509520025	3.97E-17	0.584578498	3.28E-23	-0.318659584	5.12E-07	-0.118086622	0.068983432	-0.194596044	0.002568503
ACKR1	black	-0.353124318	2.14E-08	0.353124318	2.14E-08	0.19790091	0.00215939	0.478982345	4.71E-15	0.12565895	0.052862015	0.025763933	0.692518443	-0.334502926	1.25E-07	-0.209268092	0.001164377	-0.263911023	3.73E-05	-0.630080569	9.78E-28	-0.524346888	3.27E-18	-0.560977013	3.95E-21	0.352291122	2.32E-08	0.177412605	0.006062477	0.166204355	0.010214985	-0.170007217	0.008586472	0.032789948	0.614731719	-0.21586504	0.000801486
CAST	black	0.270439718	2.34E-05	-0.270439718	2.34E-05	-0.212098097	0.000993356	-0.256388685	6.29E-05	0.12416591	0.055765704	0.112621078	0.082952481	0.407186161	6.40E-11	0.157859834	0.014775885	0.182571945	0.004720085	0.671661732	1.39E-32	0.462216748	5.33E-14	0.703228296	7.98E-37	-0.508814142	4.46E-17	-0.151833029	0.019096717	-0.216882923	0.000755854	0.195439019	0.002457948	0.018763449	0.773369904	-0.000143791	0.998239374
RIOK3	black	0.330570049	1.78E-07	-0.330570049	1.78E-07	-0.336350401	1.05E-07	-0.35945524	1.14E-08	0.020749489	0.750138686	0.175406557	0.006670559	0.508158472	4.97E-17	0.119428123	0.065865837	0.186252195	0.003932764	0.612764653	6.30E-26	0.405578618	7.73E-11	0.693582242	1.80E-35	-0.439250293	1.20E-12	-0.18648572	0.003887055	-0.147738072	0.022624508	0.361722299	9.10E-09	0.175315283	0.006699479	0.057426764	0.37777639
IVNS1ABP	black	0.40451549	8.75E-11	-0.40451549	8.75E-11	-0.276951966	1.46E-05	-0.324426476	3.09E-07	0.018988943	0.770721632	0.050723062	0.436039212	0.312899722	8.39E-07	0.229561686	0.000356079	0.27406717	1.80E-05	0.749462722	3.70E-44	0.648625507	8.35E-30	0.652413219	3.03E-30	-0.57334293	3.37E-22	-0.16265825	0.011973806	-0.119936211	0.064715604	0.221769574	0.00056833	-0.101517805	0.118303822	-0.058775289	0.366659732
RRAGD	black	0.329325472	2.00E-07	-0.329325472	2.00E-07	-0.237761571	0.000213973	-0.082320679	0.20571213	0.35081293	2.68E-08	-0.10326507	0.112069581	0.062929912	0.333702722	0.102850482	0.113525019	0.395104231	2.58E-10	0.772943129	1.57E-48	0.503360796	1.08E-16	0.406060763	7.31E-11	-0.667970332	4.03E-32	-0.298745824	2.70E-06	-0.386299521	6.86E-10	0.234963577	0.000255097	-0.21536015	0.00082505	0.014992095	0.818028035
APPL1	black	0.420582028	1.28E-11	-0.420582028	1.28E-11	-0.436096167	1.81E-12	-0.452381718	2.08E-13	0.031393782	0.629885067	0.245830303	0.000127375	0.546977897	5.68E-20	0.258147983	5.58E-05	0.368464192	4.57E-09	0.7452798	1.98E-43	0.519733604	7.21E-18	0.724618491	4.96E-40	-0.567277088	1.14E-21	-0.199060717	0.002030524	-0.198205241	0.002124873	0.35209012	2.36E-08	0.148686723	0.021760687	-0.000970689	0.988114972
CSF1R	black	-0.380438889	1.30E-09	0.380438889	1.30E-09	-0.012439722	0.848597911	0.488676358	1.09E-15	0.055855884	0.39098313	-0.123718543	0.056661028	-0.29872506	2.71E-06	-0.035992075	0.580595965	-0.234641081	0.000260283	-0.590352816	9.58E-24	-0.463778482	4.28E-14	-0.493473261	5.18E-16	0.436010309	1.83E-12	0.459616979	7.67E-14	0.205337707	0.001446908	-0.042775285	0.511353684	0.084708089	0.192822592	-0.072110174	0.267841183
BCHE	black	0.276615529	1.49E-05	-0.276615529	1.49E-05	-0.2132061	0.000932937	-0.041311136	0.525929026	0.125552028	0.053065699	-0.136905538	0.034780443	0.112542915	0.083167654	0.074118595	0.254705957	0.512366997	2.48E-17	0.544112513	9.65E-20	0.443705432	6.69E-13	0.260809118	4.64E-05	-0.353073828	2.15E-08	-0.211097704	0.001050977	-0.307758302	1.29E-06	0.091268505	0.160455894	-0.304150936	1.74E-06	0.127646705	0.049192079
AKR1C1	black	0.208381258	0.001223293	-0.208381258	0.001223293	-0.102715955	0.114000451	-0.165664015	0.010467281	0.107165944	0.099081173	-0.079615628	0.221055225	0.009627508	0.882542102	0.078101172	0.229992924	0.422679067	9.88E-12	0.382763046	1.01E-09	0.229106509	0.000366098	0.115841132	0.074470673	-0.297516167	2.98E-06	-0.218701538	0.000680243	-0.137904398	0.033465407	0.110444383	0.089114518	-0.055076079	0.397641338	0.170802652	0.008276569
GPSM3	black	-0.484245285	2.14E-15	0.484245285	2.14E-15	0.039595895	0.54326832	0.450215529	2.80E-13	-0.075811647	0.243984583	-0.040584422	0.533240893	-0.307309322	1.34E-06	-0.244304265	0.000140694	-0.453454579	1.80E-13	-0.790896782	3.02E-52	-0.610579351	1.05E-25	-0.55509672	1.23E-20	0.61776225	1.94E-26	0.318865508	5.03E-07	0.309473768	1.12E-06	-0.188283476	0.003550916	0.255651156	6.61E-05	-0.03576857	0.582949742
ACVR2A	black	0.469325588	1.94E-14	-0.469325588	1.94E-14	-0.273394659	1.89E-05	-0.429647611	4.13E-12	-0.103078704	0.112722012	-0.192583189	0.002850988	0.259296477	5.15E-05	0.26732026	2.93E-05	0.231889594	0.000308702	0.802941714	5.99E-55	0.780767492	4.17E-50	0.709905196	8.56E-38	-0.50056273	1.69E-16	-0.056216377	0.387928009	-0.223636232	0.000508844	0.167528465	0.009619338	-0.189479035	0.003342162	0.001382504	0.983073387
OGN	blue	0.226654159	0.000424738	-0.226654159	0.000424738	-0.060184696	0.355260269	-0.107611447	0.097677077	-0.140632991	0.030086623	-0.114888121	0.076904215	0.163977512	0.011290527	0.155978111	0.016022467	0.142861319	0.027547621	0.325083053	2.92E-07	0.394331982	2.81E-10	0.284989182	7.95E-06	-0.067371106	0.300643108	0.097172422	0.134979667	-0.207766541	0.001265722	0.084884909	0.191891948	-0.333442365	1.37E-07	-0.033257325	0.609694881
GBP3	blue	0.399638776	1.54E-10	-0.399638776	1.54E-10	-0.010239603	0.875133463	-0.37919519	1.48E-09	-0.324361154	3.11E-07	-0.175289634	0.006707626	0.215264096	0.000829605	0.280185399	1.14E-05	0.089640557	0.168078933	0.423154558	9.32E-12	0.572382246	4.09E-22	0.502842239	1.18E-16	-0.069812532	0.283426267	0.105243081	0.105325991	0.082337184	0.20562094	0.055425196	0.39465212	-0.269566278	2.50E-05	-0.008474683	0.896522871
CD69	blue	0.262836546	4.03E-05	-0.262836546	4.03E-05	-0.093631228	0.149858158	-0.293111072	4.23E-06	-0.343695978	5.30E-08	-0.110505547	0.088936499	0.178022571	0.005887684	0.336222297	1.07E-07	-0.082979577	0.202094185	0.177837965	0.005940103	0.394045198	2.90E-10	0.411496287	3.84E-11	0.0106498	0.870174572	0.563129246	2.59E-21	0.410413481	4.37E-11	0.111114573	0.087179413	-0.116495393	0.072836476	-0.159593233	0.01370357
EIF5A	blue	-0.286776066	6.94E-06	0.286776066	6.94E-06	0.229133728	0.000365492	0.253141828	7.84E-05	0.262530897	4.11E-05	0.289862842	5.46E-06	0.003628922	0.955588988	-0.114330422	0.078357935	0.030129172	0.643745677	-0.247566481	0.00011366	-0.389432864	4.86E-10	-0.279289945	1.22E-05	0.02274486	0.727022944	-0.159049622	0.014032262	-0.133486746	0.039618082	-0.141547669	0.029021212	0.146682921	0.023619938	-0.062449035	0.337417097
CAPN14	blue	0.201578744	0.001774548	-0.201578744	0.001774548	-0.043649917	0.502747964	-0.087274179	0.179636963	-0.04180545	0.52098473	0.082541098	0.204496661	0.210184365	0.001106252	0.170369857	0.008443931	-0.128744226	0.047258463	0.246569185	0.000121359	0.311262904	9.64E-07	0.333983843	1.31E-07	-0.187288564	0.003733544	0.124954489	0.054216029	0.184482641	0.004295196	-0.12719696	0.050003275	-0.189785614	0.003290451	-0.140056066	0.030775658
ALDH1A1	blue	0.254480459	7.16E-05	-0.254480459	7.16E-05	-0.100157255	0.123342831	-0.084539833	0.193711217	-0.033327379	0.608941492	0.106057212	0.102645098	0.279770242	1.18E-05	0.098440178	0.129938112	-0.072763775	0.263516762	0.318872682	5.03E-07	0.375623529	2.16E-09	0.356463638	1.54E-08	-0.172653857	0.00759352	0.021573426	0.740565246	-0.164021812	0.011268193	-0.088968041	0.171305744	-0.246537131	0.000121614	0.031329379	0.630587886
CD36	blue	0.402205616	1.14E-10	-0.402205616	1.14E-10	-0.141183792	0.029441125	-0.041188195	0.527162411	0.085735462	0.187461139	-0.09857848	0.129397022	0.166380829	0.010133759	0.08712313	0.180394178	0.592231232	6.38E-24	0.565299619	1.69E-21	0.54688523	5.78E-20	0.324259226	3.14E-07	-0.300735618	2.30E-06	-0.124545955	0.055014343	-0.141063347	0.029581257	0.062742347	0.335148379	-0.454039982	1.66E-13	0.156693613	0.015538041
PDZRN4	blue	0.166320853	0.0101613	-0.166320853	0.0101613	-0.194399908	0.002594865	-0.145198508	0.025084133	-0.340882105	6.91E-08	-0.081750779	0.208878916	0.090724214	0.162975151	0.044735175	0.492176541	-0.309670669	1.10E-06	0.011653075	0.858067682	0.281833863	1.01E-05	0.266728829	3.06E-05	0.099521009	0.125755685	0.183586419	0.004490004	0.307455245	1.33E-06	0.026972764	0.678874039	-0.110453601	0.089087669	-0.217517804	0.000728618
PNLIPRP3	blue	0.278829242	1.27E-05	-0.278829242	1.27E-05	-0.082316344	0.205736088	-0.125300253	0.053547901	-0.097961085	0.131825999	-0.045280249	0.486912052	0.136655772	0.03511604	-0.044286882	0.496528918	0.166804353	0.00994115	0.267408373	2.91E-05	0.333885296	1.32E-07	0.26625205	3.16E-05	-0.096100161	0.1393599	-0.129468517	0.046017518	0.035420191	0.586627389	-0.068881118	0.289914605	-0.22530673	0.000460554	0.080798505	0.214248515
SERPINE1	blue	-0.229006865	0.000368326	0.229006865	0.000368326	0.173755738	0.007211223	0.174486852	0.00696713	-0.011541711	0.859409963	0.241770654	0.000165721	0.070342544	0.279778101	-0.092897861	0.153089224	-0.196688004	0.002302086	-0.31894248	5.00E-07	-0.262298059	4.18E-05	-0.040885385	0.530206553	0.12722525	0.049951924	0.055896359	0.390639388	0.481322097	3.32E-15	-0.114801521	0.077128507	0.030815926	0.636202917	-0.325767833	2.75E-07
DEPDC7	blue	0.542221161	1.37E-19	-0.542221161	1.37E-19	-0.222140072	0.000556034	-0.251694291	8.64E-05	-0.140905796	0.02976542	-0.018261194	0.779277928	0.420043739	1.37E-11	0.146192337	0.024095469	0.117175976	0.071167597	0.689496288	6.51E-35	0.805480967	1.53E-55	0.717557883	6.12E-39	-0.36377754	7.39E-09	-0.132801034	0.04065379	-0.036648409	0.573709672	0.036141067	0.579029367	-0.417662365	1.83E-11	0.045655761	0.483302911
GRAMD1C	blue	0.57636915	1.82E-22	-0.57636915	1.82E-22	-0.381543645	1.15E-09	-0.507423245	5.60E-17	-0.211581103	0.001022761	-0.224158	0.00049328	0.227239074	0.000410009	0.231085656	0.000324357	0.441625361	8.80E-13	0.709335511	1.04E-37	0.752090894	1.27E-44	0.623909679	4.44E-27	-0.318755849	5.08E-07	-0.004350194	0.946773954	-0.125124417	0.053886813	0.106197794	0.102187677	-0.090358503	0.164684424	0.122499361	0.059161499
PEG3	blue	0.254953471	6.94E-05	-0.254953471	6.94E-05	-0.155367061	0.016446566	-0.086878886	0.181623566	0.096130806	0.139233223	0.114265977	0.078527343	0.255128761	6.85E-05	-0.057151812	0.380068037	0.050709132	0.436165401	0.435971005	1.84E-12	0.373625419	2.67E-09	0.357708195	1.36E-08	-0.306678984	1.41E-06	-0.236461453	0.000232245	-0.152574318	0.018511973	0.160450988	0.013198667	-0.173246153	0.007385837	0.150347521	0.020316964
AREG	blue	0.359741113	1.11E-08	-0.359741113	1.11E-08	-0.163523793	0.011521536	-0.208680153	0.001203137	-0.065400268	0.31503636	-0.111964237	0.084774694	0.025308895	0.697680671	0.039910042	0.540071584	0.105191211	0.105498648	0.385214363	7.72E-10	0.400901703	1.33E-10	0.371196615	3.44E-09	-0.270831986	2.28E-05	-0.019478393	0.764982541	0.24390121	0.000144423	0.299282656	2.59E-06	-0.078530454	0.227433935	-0.091604267	0.15891647
LINC00960	blue	0.209252729	0.001165375	-0.209252729	0.001165375	-0.317343682	5.74E-07	-0.118281542	0.068523103	0.003302203	0.959583837	-0.109049503	0.093252297	0.029117062	0.654928499	0.111269748	0.086736198	0.244123273	0.000142357	0.325913886	2.71E-07	0.308035496	1.26E-06	0.188282764	0.003551044	-0.243106357	0.00015205	-0.049337794	0.448690101	0.026580721	0.683287956	0.001156629	0.985838559	-0.087650429	0.177761015	-0.023733481	0.715659425
LINC01003	blue	0.473161387	1.11E-14	-0.473161387	1.11E-14	-0.332041134	1.56E-07	-0.280422483	1.12E-05	-0.225662665	0.00045083	-0.329507861	1.96E-07	0.072787423	0.2633612	0.199935952	0.001937962	0.204488799	0.001515638	0.416926135	2.00E-11	0.585177285	2.89E-23	0.295885016	3.40E-06	-0.103734945	0.110437779	0.099811901	0.124648033	-0.037442387	0.565430981	0.075908543	0.243380657	-0.350018478	2.89E-08	0.149827983	0.020759402
TTK	blue	0.566783084	1.26E-21	-0.566783084	1.26E-21	-0.331171161	1.69E-07	-0.360153295	1.07E-08	-0.20120932	0.001810158	-0.361159721	9.63E-09	0.119003725	0.066839394	0.212715624	0.000959252	0.277408452	1.41E-05	0.599847273	1.20E-24	0.744879681	2.32E-43	0.457782301	9.91E-14	-0.25737781	5.88E-05	-0.052386514	0.42112131	0.059296843	0.362415187	0.259345906	5.13E-05	-0.2980282	2.86E-06	0.151296289	0.019530062
MMRN1	blue	0.499781811	1.92E-16	-0.499781811	1.92E-16	-0.326847394	2.49E-07	-0.226386933	0.000431629	-0.208508617	0.001214667	0.001892554	0.97683013	0.450559558	2.67E-13	0.166321976	0.010160784	0.331239908	1.68E-07	0.517395304	1.07E-17	0.642882795	3.78E-29	0.54679192	5.88E-20	-0.112069684	0.084480014	0.025112582	0.699912079	-0.10877938	0.094071026	0.070698319	0.277347105	-0.335089462	1.18E-07	0.042701682	0.512081348
GREM1	blue	0.31023587	1.05E-06	-0.31023587	1.05E-06	-0.046498658	0.47525443	-0.127900611	0.048738978	-0.269229295	2.56E-05	0.021871411	0.737112629	0.304772352	1.66E-06	0.095813602	0.140548719	0.105613461	0.104099579	0.18956083	0.003328294	0.416924255	2.00E-11	0.421494042	1.14E-11	0.026023128	0.689584301	0.073801545	0.256749352	0.354671887	1.84E-08	-0.03710526	0.568939185	-0.284691176	8.14E-06	-0.034365418	0.597826652
NDUFA11	blue	-0.210211632	0.001104564	0.210211632	0.001104564	0.202241859	0.001712229	0.135676556	0.036458372	0.195443134	0.002457419	0.412637814	3.35E-11	-0.019662895	0.762822449	-0.231556565	0.0003151	-0.056560362	0.385026317	-0.359385338	1.15E-08	-0.438173974	1.38E-12	-0.401033772	1.31E-10	0.139761751	0.031132319	-0.078014332	0.230513051	-0.051145542	0.432221985	-0.208837098	0.001192676	0.191104656	0.003076129	0.072287834	0.266660965
CYP1B1	blue	0.157836337	0.014790912	-0.157836337	0.014790912	-0.081408218	0.210799248	-0.172105308	0.007790488	-0.256027503	6.45E-05	-0.157227602	0.0151849	0.049354982	0.448531876	0.117781628	0.069708776	-0.155559004	0.016312305	0.141640056	0.028915416	0.313695276	7.84E-07	0.269946952	2.43E-05	-0.014198513	0.827505673	0.068418219	0.293175891	0.052914669	0.416447776	0.137575598	0.033893538	-0.106675129	0.100646561	0.038421674	0.555299345
PSENEN	blue	-0.273536189	1.87E-05	0.273536189	1.87E-05	0.397465263	1.97E-10	0.24436171	0.000140169	0.096376431	0.138221059	0.462051785	5.46E-14	0.07341946	0.259226888	-0.173860853	0.007175666	-0.123966503	0.056163325	-0.485989878	1.64E-15	-0.508338653	4.82E-17	-0.425309053	7.13E-12	0.342349406	6.02E-08	-0.092759876	0.153702997	-0.005986074	0.926806677	-0.113281784	0.081151494	0.038825997	0.551142095	0.022213468	0.73315587
TLR3	blue	0.488073646	1.19E-15	-0.488073646	1.19E-15	-0.322409823	3.69E-07	-0.302198084	2.04E-06	-0.087715666	0.177437229	-0.192073588	0.00292684	0.255103371	6.87E-05	0.412791776	3.29E-11	0.18546779	0.004089873	0.692331726	2.68E-35	0.735428779	9.06E-42	0.581622547	6.11E-23	-0.419650628	1.43E-11	0.105216978	0.105412852	-0.12266614	0.058814163	0.098976121	0.12785099	-0.345384148	4.51E-08	-0.018819587	0.77271035
HMCN1	blue	0.297894529	2.89E-06	-0.297894529	2.89E-06	-0.160126152	0.01338792	-0.228880338	0.000371174	-0.224422281	0.000485566	-0.182569461	0.004720661	0.096348127	0.138337405	0.236942939	0.000225315	0.184923602	0.00420217	0.365418597	6.25E-09	0.496365941	3.29E-16	0.3744622	2.45E-09	-0.096925774	0.135977754	0.251305012	8.87E-05	-0.080678224	0.214933714	0.080868403	0.213851045	-0.242083039	0.000162425	-0.123773672	0.056550059
CYP39A1	blue	0.458409154	9.08E-14	-0.458409154	9.08E-14	-0.16490898	0.010829045	-0.137366399	0.034168353	0.054480838	0.402769091	-0.051731711	0.426957769	0.320710753	4.29E-07	0.216744562	0.000761912	0.553835222	1.56E-20	0.726706762	2.32E-40	0.695726256	9.12E-36	0.506108107	6.94E-17	-0.433523134	2.52E-12	-0.198026325	0.002145104	-0.172313026	0.007715374	0.024552187	0.706295979	-0.495313764	3.89E-16	-4.41E-05	0.999460563
HS6ST2	blue	0.402736019	1.08E-10	-0.402736019	1.08E-10	-0.246873638	0.000118958	-0.288617104	6.02E-06	-0.257528799	5.82E-05	-0.036202668	0.578382226	0.249598852	9.94E-05	0.121850323	0.060529324	-0.174455484	0.006977449	0.384764373	8.11E-10	0.601650027	7.99E-25	0.573079425	3.55E-22	-0.190486864	0.003174883	0.068392592	0.293357154	0.248186333	0.000109109	0.011937893	0.854636583	-0.195149795	0.002495382	-0.150245343	0.020403328
APOLD1	blue	0.278522613	1.30E-05	-0.278522613	1.30E-05	-0.073514287	0.258610474	-0.145354375	0.024926806	-0.241158279	0.000172366	-0.129215441	0.046447983	0.117342809	0.070763291	0.036696016	0.573211677	0.00237939	0.970872325	0.253360137	7.73E-05	0.419732278	1.42E-11	0.345337583	4.53E-08	-0.03000669	0.645094794	-0.003311315	0.959472408	0.305535055	1.55E-06	0.1820692	0.00483799	-0.320318168	4.43E-07	-0.026079605	0.68894558
SLC19A2	blue	0.543517477	1.08E-19	-0.543517477	1.08E-19	-0.270217309	2.38E-05	-0.300197238	2.40E-06	-0.000984521	0.987945623	-0.025818253	0.691903149	0.295543259	3.49E-06	0.108563773	0.09472862	0.553432045	1.69E-20	0.761195987	2.80E-46	0.690613513	4.59E-35	0.625181098	3.26E-27	-0.463421723	4.50E-14	-0.244164663	0.000141975	-0.072241818	0.266966314	0.105158755	0.105606799	-0.277261187	1.42E-05	-0.021796675	0.73797807
CENPK	blue	0.607756074	2.00E-25	-0.607756074	2.00E-25	-0.408347627	5.58E-11	-0.460853247	6.46E-14	-0.321010413	4.17E-07	-0.197615355	0.00219224	0.292913737	4.30E-06	0.285872761	7.43E-06	0.148331616	0.02208064	0.599022458	1.44E-24	0.813861107	1.44E-57	0.685696085	2.11E-34	-0.270898362	2.27E-05	0.085602126	0.188150726	0.167117575	0.009800795	0.1386055	0.032567831	-0.187560764	0.003682754	-0.004684082	0.942695458
XK	blue	0.53776199	3.07E-19	-0.53776199	3.07E-19	-0.221512829	0.000576997	-0.335908095	1.10E-07	0.040633431	0.532746182	-0.084480205	0.194026849	0.249008549	0.000103335	0.208948415	0.001185307	0.37123952	3.43E-09	0.791712901	2.01E-52	0.733445394	1.92E-41	0.584356479	3.44E-23	-0.529541239	1.33E-18	-0.18272387	0.004684967	-0.156771211	0.015486282	0.061889187	0.341774573	-0.346437143	4.08E-08	-0.028035922	0.666959523
LY75	blue	0.361826971	9.00E-09	-0.361826971	9.00E-09	-0.217248083	0.000740076	-0.487436316	1.32E-15	-0.524602118	3.13E-18	-0.327606566	2.33E-07	0.081083091	0.212633556	0.332801111	1.46E-07	0.0581409	0.371863884	0.261075854	4.55E-05	0.55454301	1.37E-20	0.396257863	2.26E-10	0.092384187	0.155383532	0.350013941	2.89E-08	0.156830719	0.015446691	0.046406168	0.476133989	-0.086430357	0.183897279	-0.039762687	0.541569889
SHPRH	blue	0.678567958	1.82E-33	-0.678567958	1.82E-33	-0.314264655	7.47E-07	-0.423512959	8.91E-12	-0.376243463	2.03E-09	-0.135190063	0.037141262	0.433882248	2.41E-12	0.213877998	0.000897966	0.195749756	0.002418299	0.701316243	1.50E-36	0.933757029	2.72E-107	0.754351524	5.00E-45	-0.180268339	0.005282373	-0.017155839	0.792324495	0.009647224	0.882303312	0.124371973	0.055357263	-0.439304578	1.19E-12	0.106583816	0.100939939
LOC100288675	blue	0.493750819	4.96E-16	-0.493750819	4.96E-16	-0.265504005	3.34E-05	-0.511630268	2.81E-17	-0.345039647	4.66E-08	-0.436504573	1.72E-12	0.101354135	0.118901372	0.11568617	0.074862063	0.071293103	0.273314992	0.471897324	1.33E-14	0.627710625	1.76E-27	0.47524051	8.19E-15	-0.157145418	0.015238789	0.041307558	0.525964895	0.084126224	0.195908336	0.409491917	4.88E-11	-0.140125897	0.030691547	0.059410799	0.361491868
KLK6	blue	-0.14853129	0.021900236	0.14853129	0.021900236	0.004436167	0.94572364	0.096810559	0.136445915	0.125859135	0.052482412	0.113649139	0.080163863	-0.015417889	0.812953624	-0.143812828	0.026520736	0.005303906	0.935128263	-0.193643282	0.002698882	-0.278214671	1.33E-05	-0.113149101	0.081510614	0.098354791	0.130273046	-0.016946903	0.794797198	0.079382682	0.222413636	-0.055073143	0.397666528	0.217305258	0.000737634	0.079957171	0.219074234
GHR	blue	0.413977069	2.86E-11	-0.413977069	2.86E-11	-0.160416	0.013218938	-0.1507676	0.019965226	0.001851574	0.9773317	-0.252219701	8.34E-05	0.101301286	0.119094822	0.21510063	0.00083741	0.376405133	1.99E-09	0.703572208	7.13E-37	0.724385247	5.39E-40	0.422561693	1.00E-11	-0.394461477	2.77E-10	-0.102379499	0.115196336	-0.22849699	0.000379926	0.06060898	0.351872598	-0.538441071	2.72E-19	-0.049105327	0.450833198
ERAP1	blue	0.35534339	1.72E-08	-0.35534339	1.72E-08	-0.244341416	0.000140354	-0.320930913	4.20E-07	-0.377851569	1.71E-09	-0.155951086	0.016041019	0.114759491	0.077237554	0.122518972	0.059120567	-0.035935656	0.581189706	0.142574293	0.027864	0.349908599	2.92E-08	0.231957568	0.000307411	0.168456179	0.009220544	0.099735124	0.124939646	0.111235372	0.086834229	0.142067185	0.028430575	-0.077970563	0.230775513	-0.038096369	0.558655136
OMD	blue	0.271203209	2.22E-05	-0.271203209	2.22E-05	0.010725899	0.869255155	-0.16482235	0.010871251	-0.276615837	1.49E-05	-0.051177532	0.431933734	0.335381865	1.15E-07	0.183396768	0.004532233	0.042988711	0.5092467	0.3025105	1.99E-06	0.468838245	2.08E-14	0.450103575	2.84E-13	0.013443225	0.83654923	0.188213992	0.003563404	-0.050696384	0.436280899	-0.028136285	0.665839027	-0.38272246	1.01E-09	-0.015877081	0.807489921
DLGAP5	blue	0.529781112	1.27E-18	-0.529781112	1.27E-18	-0.206697181	0.001342763	-0.445213434	5.47E-13	-0.327047446	2.45E-07	-0.253860108	7.47E-05	0.222948061	0.000530069	0.150807359	0.019932211	0.110721632	0.088309859	0.503162664	1.12E-16	0.70566045	3.57E-37	0.561115304	3.84E-21	-0.153806694	0.017574276	-0.047983456	0.461256199	0.197416657	0.002215366	0.150394457	0.020277399	-0.226378595	0.000431845	0.102330318	0.115371962
EFEMP1	blue	0.404305439	8.97E-11	-0.404305439	8.97E-11	-0.379475061	1.44E-09	-0.314636158	7.24E-07	-0.241062494	0.000173428	-0.293593252	4.08E-06	0.007312606	0.910648221	0.23791724	0.000211877	0.185192874	0.004146261	0.43733615	1.54E-12	0.560758474	4.12E-21	0.380390671	1.30E-09	-0.133828013	0.039110978	0.113510269	0.080536065	0.024687183	0.704756239	0.087253664	0.179739668	-0.130353641	0.044538154	-0.003942826	0.951751881
KIF11	blue	0.594431398	3.95E-24	-0.594431398	3.95E-24	-0.412997385	3.21E-11	-0.438786678	1.28E-12	-0.213238355	0.00093123	-0.076424974	0.240179491	0.433144494	2.65E-12	0.228684292	0.000375626	0.257776603	5.72E-05	0.748248047	6.05E-44	0.845597951	2.83E-66	0.777914255	1.59E-49	-0.363604512	7.52E-09	-0.102407712	0.115095682	-0.042538646	0.513695096	0.142384808	0.028074563	-0.210840741	0.001066266	0.106994126	0.099626951
SACS	blue	0.571512373	4.88E-22	-0.571512373	4.88E-22	-0.189608796	0.003320186	-0.387374296	6.10E-10	-0.404953689	8.32E-11	-0.140367812	0.030401679	0.368404158	4.60E-09	0.156812506	0.015458799	0.190845556	0.003117202	0.562178913	3.12E-21	0.839729876	1.60E-64	0.678434283	1.90E-33	-0.10714919	0.099134288	0.073137268	0.261067226	0.134834051	0.037647827	-0.023848832	0.714337549	-0.456243182	1.23E-13	0.073346146	0.259704152
OTUD6B	blue	0.538608336	2.63E-19	-0.538608336	2.63E-19	-0.43010037	3.90E-12	-0.545759399	7.12E-20	-0.259739926	5.00E-05	-0.38991928	4.60E-10	-0.064030503	0.325300636	0.108047665	0.096317599	0.181043421	0.005086807	0.507915129	5.17E-17	0.59868738	1.55E-24	0.429409519	4.26E-12	-0.250241724	9.52E-05	-0.019384503	0.766082469	0.029884719	0.646439438	0.464321584	3.96E-14	0.121932385	0.060354956	0.103495357	0.111267487
SPIN4	blue	0.573998212	2.95E-22	-0.573998212	2.95E-22	-0.333324448	1.39E-07	-0.476691505	6.61E-15	-0.123375567	0.057355456	-0.143981222	0.026342466	0.150258081	0.020392544	0.162036237	0.012308412	0.202936085	0.001649134	0.657769763	7.05E-31	0.685710643	2.10E-34	0.563016965	2.65E-21	-0.413233536	3.12E-11	-0.089822371	0.167214406	-0.017452163	0.788821121	0.17336218	0.007345751	-0.117180996	0.071155406	0.061110538	0.347894254
P2RY14	blue	0.361466228	9.33E-09	-0.361466228	9.33E-09	-0.263386306	3.87E-05	-0.261525674	4.41E-05	-0.240853215	0.000175768	-0.332680821	1.47E-07	-0.038237598	0.557197035	0.325127563	2.91E-07	0.174077098	0.007103008	0.335609613	1.13E-07	0.507088518	5.91E-17	0.299817652	2.48E-06	-0.090790758	0.162665574	0.295383193	3.54E-06	0.066583816	0.306339692	0.169470939	0.008801183	-0.197995626	0.002148593	-0.099514917	0.125778966
PBK	blue	0.591940397	6.79E-24	-0.591940397	6.79E-24	-0.123689759	0.05671904	-0.386587839	6.65E-10	-0.270412298	2.35E-05	-0.049359594	0.448489423	0.472854326	1.16E-14	0.207575107	0.001279209	0.183712035	0.004462228	0.605636199	3.25E-25	0.787333622	1.76E-51	0.691073726	3.98E-35	-0.239493437	0.000191711	-0.070335929	0.279823441	0.10970542	0.091287891	0.006510298	0.920417156	-0.431650162	3.20E-12	0.039942916	0.5397376
MAP4K3	blue	0.630829076	8.12E-28	-0.630829076	8.12E-28	-0.330206667	1.84E-07	-0.409150309	5.08E-11	-0.326931331	2.48E-07	-0.064342754	0.322941989	0.471625589	1.39E-14	0.170340228	0.008455498	0.240185897	0.000183431	0.712721471	3.27E-38	0.886820627	4.44E-81	0.820538341	2.97E-59	-0.238509532	0.000204077	-0.092100325	0.156662469	-0.034777477	0.593440042	0.120767484	0.062869279	-0.318632837	5.13E-07	0.065300756	0.31577485
MSH2	blue	0.526708479	2.17E-18	-0.526708479	2.17E-18	-0.197982118	0.00215013	-0.292292526	4.52E-06	-0.158219324	0.014547646	0.061744137	0.342909357	0.585461526	2.72E-23	0.276520609	1.50E-05	0.273118812	1.93E-05	0.742581274	5.74E-43	0.833054227	1.29E-62	0.760807382	3.30E-46	-0.372384872	3.04E-09	-0.100914588	0.120517773	-0.063299242	0.33086783	-0.04265873	0.512506244	-0.487368439	1.33E-15	0.018620075	0.775055094
PLAUR	blue	-0.278287021	1.32E-05	0.278287021	1.32E-05	0.170956421	0.00821782	0.174144017	0.007080657	-0.013074592	0.840970998	0.143626779	0.026718899	-0.115986203	0.074105773	-0.072707998	0.263883917	-0.300426478	2.36E-06	-0.386161055	6.96E-10	-0.335663468	1.12E-07	-0.159992817	0.01346629	0.121124587	0.062089522	0.108568827	0.094713163	0.541465309	1.57E-19	-0.12521647	0.053709167	0.137915732	0.033450731	-0.415284788	2.44E-11
MCTP1	blue	0.519101276	8.03E-18	-0.519101276	8.03E-18	-0.197805264	0.002170342	-0.477533442	5.84E-15	-0.562625339	2.86E-21	-0.302780839	1.95E-06	0.127221883	0.049958033	0.087735029	0.177341206	0.011040396	0.865457351	0.283375644	8.99E-06	0.657888814	6.82E-31	0.463377063	4.53E-14	0.137821582	0.033572805	0.177340054	0.006083574	0.373369016	2.75E-09	0.033621019	0.605788066	-0.271890483	2.11E-05	-0.030252822	0.642384876
NPHP3	blue	0.568217873	9.46E-22	-0.568217873	9.46E-22	-0.248337272	0.000108027	-0.359440875	1.14E-08	-0.31793162	5.46E-07	-0.185528134	0.004077589	0.363034256	7.97E-09	0.224374212	0.00048696	0.173330483	0.007356683	0.672783984	1.00E-32	0.884607637	3.81E-80	0.718227185	4.84E-39	-0.223611102	0.000509605	-0.032100455	0.62219528	-0.036850567	0.571596395	0.085281061	0.189818834	-0.454715116	1.51E-13	0.030030043	0.644837476
FNBP1L	blue	0.577816167	1.35E-22	-0.577816167	1.35E-22	-0.344844023	4.75E-08	-0.337897895	9.12E-08	-0.120941253	0.062488845	-0.153030508	0.018159912	0.249431536	0.000100477	0.121729787	0.060786196	0.26657464	3.09E-05	0.762831942	1.38E-46	0.834022075	6.93E-63	0.641329385	5.66E-29	-0.397960327	1.86E-10	-0.117170572	0.071180725	-0.1352659	0.037034104	0.159206366	0.013936786	-0.356617129	1.52E-08	0.047173988	0.468859072
CLIC2	blue	0.355809961	1.64E-08	-0.355809961	1.64E-08	-0.211118675	0.001049739	-0.367962228	4.82E-09	-0.468025558	2.33E-14	-0.157991516	0.014691919	0.319329187	4.83E-07	0.316838897	5.99E-07	-0.05264518	0.418828621	0.243155963	0.000151563	0.536964906	3.54E-19	0.469996334	1.76E-14	0.083393166	0.199846876	0.360447699	1.03E-08	0.287873904	6.37E-06	0.083451606	0.199530802	-0.249244897	0.000101729	-0.296362002	3.27E-06
ZNF658	blue	0.47051952	1.63E-14	-0.47051952	1.63E-14	-0.220306103	0.000619397	-0.301969416	2.08E-06	-0.194762039	0.002546382	-0.304749693	1.66E-06	0.187087256	0.003771513	0.206370018	0.001367178	0.236154838	0.000236761	0.64855653	8.51E-30	0.777943529	1.57E-49	0.498130208	2.49E-16	-0.29643475	3.25E-06	-0.085480117	0.188783357	-0.10070029	0.121312009	0.033355467	0.608639533	-0.468751607	2.10E-14	0.06906019	0.288659515
LINC00597	blue	0.450923373	2.54E-13	-0.450923373	2.54E-13	-0.058457915	0.369257616	-0.382461584	1.04E-09	-0.484683455	2.00E-15	-0.26618497	3.18E-05	0.119372984	0.065991666	0.162475498	0.012071274	0.001660205	0.979674047	0.265616792	3.31E-05	0.589703899	1.10E-23	0.332367844	1.52E-07	0.160166305	0.013364398	0.196931857	0.002272726	0.238105802	0.000209364	0.083588181	0.198793545	-0.462450007	5.16E-14	0.089743094	0.167590959
C8orf4	blue	0.320608902	4.32E-07	-0.320608902	4.32E-07	-0.016011321	0.805894412	-0.356948579	1.47E-08	-0.432885073	2.74E-12	-0.102879524	0.113422586	0.201377484	0.001793868	0.065916399	0.311224222	-0.086795737	0.182043499	0.199348127	0.001999693	0.446053062	4.89E-13	0.482635725	2.73E-15	0.058723568	0.367082325	0.135657518	0.036484894	0.390103981	4.51E-10	0.152833778	0.018311016	-0.173120843	0.007429348	-0.036444905	0.575840726
PRPF39	blue	0.446022802	4.91E-13	-0.446022802	4.91E-13	-0.269241547	2.56E-05	-0.40094586	1.32E-10	-0.194524676	0.002578067	0.174388713	0.00699946	0.42654752	6.10E-12	0.127690734	0.049113257	0.165964505	0.010326305	0.570078341	6.52E-22	0.639761206	8.48E-29	0.685494712	2.24E-34	-0.273810098	1.84E-05	-0.102795795	0.113718101	-0.126343613	0.051573081	-0.099579623	0.125531886	0.000416002	0.994906356	0.043251728	0.506656385
HACE1	blue	0.593866824	4.47E-24	-0.593866824	4.47E-24	-0.442763775	7.57E-13	-0.439507461	1.16E-12	-0.1459739	0.024309844	-0.003877811	0.952546529	0.437783773	1.45E-12	0.147698715	0.022660976	0.304072709	1.75E-06	0.801209256	1.51E-54	0.84377051	1.01E-65	0.780307957	5.18E-50	-0.443107821	7.24E-13	-0.107777658	0.097157292	-0.078459538	0.227855274	0.086391444	0.184095524	-0.194873095	0.002531679	0.018856877	0.772272329
IL33	blue	0.396842675	2.12E-10	-0.396842675	2.12E-10	-0.350472904	2.77E-08	-0.229604235	0.000355155	-0.165836505	0.01038615	-0.112631112	0.082924892	0.210735442	0.00107259	0.240653757	0.000178027	0.165836296	0.010386248	0.500250239	1.78E-16	0.626117244	2.60E-27	0.53606891	4.16E-19	-0.296343701	3.28E-06	0.060739872	0.350831622	0.092205151	0.156189254	0.084044514	0.196344524	-0.171381098	0.008057491	-0.150933168	0.019828051
MICU3	blue	0.507280973	5.73E-17	-0.507280973	5.73E-17	-0.316125618	6.37E-07	-0.233164015	0.000285318	-0.368481686	4.56E-09	-0.294855699	3.69E-06	0.208848966	0.001191888	0.179340614	0.005525308	0.178495647	0.00575524	0.420891006	1.23E-11	0.72516246	4.07E-40	0.441490727	8.96E-13	0.036781952	0.572313251	0.182946226	0.004633992	0.095436603	0.142124524	0.008876018	0.89165188	-0.481849948	3.07E-15	0.023677121	0.716305586
C1QC	blue	-0.437542806	1.50E-12	0.437542806	1.50E-12	0.187867765	0.00362622	0.572901165	3.68E-22	0.249136105	0.000102465	0.448062432	3.74E-13	0.001204441	0.985253224	-0.036142752	0.579011658	-0.211491573	0.001027934	-0.542805956	1.23E-19	-0.524696475	3.08E-18	-0.40520091	8.08E-11	0.269177565	2.57E-05	0.303297422	1.87E-06	0.049535652	0.446870605	-0.298467012	2.76E-06	0.087553562	0.178242592	-0.151854465	0.019079585
IGFBP6	blue	-0.347039368	3.85E-08	0.347039368	3.85E-08	0.244911413	0.000135245	0.375118103	2.28E-09	0.401164284	1.29E-10	0.301261416	2.21E-06	-0.13711788	0.034497275	-0.268806919	2.64E-05	-0.016435455	0.800858673	-0.304050162	1.76E-06	-0.465658649	3.27E-14	-0.393896374	2.95E-10	0.002473618	0.96971936	-0.217813004	0.000716266	-0.120471081	0.063522587	-0.117821322	0.069614025	0.101502708	0.118358844	-0.072021187	0.268433673
NUF2	blue	0.552395836	2.05E-20	-0.552395836	2.05E-20	-0.238814912	0.000200162	-0.201148701	0.001816063	-0.144600457	0.025695737	-0.159098761	0.014002269	0.283757939	8.74E-06	0.16611962	0.010254191	0.252341608	8.27E-05	0.630526836	8.75E-28	0.797992101	8.14E-54	0.582418961	5.17E-23	-0.318405011	5.24E-07	-0.133549993	0.039523684	0.026241501	0.68711585	0.039177152	0.547543914	-0.45538458	1.38E-13	0.076960721	0.236889876
NDC80	blue	0.47881295	4.83E-15	-0.47881295	4.83E-15	0.126252254	0.051743546	-0.268355666	2.72E-05	-0.287127278	6.75E-06	-0.292458799	4.46E-06	0.175598697	0.006610044	0.201100548	0.001820767	0.108705303	0.094296547	0.448962592	3.31E-13	0.709675094	9.25E-38	0.443061657	7.28E-13	-0.100573155	0.121785116	0.046369964	0.476478529	0.152379576	0.018664061	0.051546102	0.428620642	-0.597589569	1.97E-24	0.104042656	0.109379292
VGLL3	blue	0.432894206	2.73E-12	-0.432894206	2.73E-12	-0.238979111	0.000198085	-0.118934725	0.066998786	-0.085870485	0.186764719	-0.220546694	0.00061072	0.112408538	0.083538628	0.18110793	0.005070827	0.388725541	5.25E-10	0.567428003	1.11E-21	0.66833716	3.63E-32	0.407768223	5.98E-11	-0.241480868	0.000168835	-0.007952997	0.902860345	-0.107572197	0.097800144	0.130877991	0.043680731	-0.457633908	1.01E-13	0.028487262	0.661926401
SLITRK6	blue	0.452303418	2.11E-13	-0.452303418	2.11E-13	-0.225348862	0.000459393	-0.154393282	0.017142673	0.039253321	0.546764955	-0.006838657	0.916417515	0.380370588	1.31E-09	0.213108794	0.000938104	0.274756106	1.71E-05	0.696562662	6.97E-36	0.668860999	3.12E-32	0.587518141	1.76E-23	-0.429394783	4.27E-12	-0.151168593	0.019634407	-0.246264466	0.000123807	0.115169757	0.076178437	-0.360167318	1.06E-08	0.04620559	0.478044494
FST	blue	0.256572022	6.21E-05	-0.256572022	6.21E-05	-0.149341787	0.021180979	-0.247704695	0.00011263	-0.313588349	7.92E-07	-0.044927923	0.490311463	0.15065107	0.020062265	0.243406868	0.000149123	-0.023851387	0.714308279	0.074684662	0.25108565	0.280144504	1.15E-05	0.318528047	5.18E-07	0.049442863	0.447723368	0.193466445	0.002723732	0.503185327	1.11E-16	-0.024116591	0.711272451	-0.072914082	0.262529089	-0.189501262	0.003338388
SLC16A14	blue	0.517136853	1.12E-17	-0.517136853	1.12E-17	-0.253911991	7.44E-05	-0.463298945	4.58E-14	-0.45516298	1.42E-13	-0.321874448	3.87E-07	0.165155306	0.010709826	0.159038453	0.014039087	0.258594895	5.41E-05	0.49135493	7.20E-16	0.7087681	1.26E-37	0.450450934	2.71E-13	0.024673084	0.704916987	0.00070396	0.991380623	-0.085228497	0.190092962	0.096601469	0.13729869	-0.304749431	1.66E-06	0.173483256	0.007304128
GLCE	blue	0.527587124	1.87E-18	-0.527587124	1.87E-18	-0.303272228	1.87E-06	-0.205872238	0.001405107	0.040613418	0.532948174	-0.063281912	0.331000505	0.319926822	4.59E-07	0.220036511	0.000629255	0.411394056	3.89E-11	0.816756493	2.73E-58	0.791366901	2.39E-52	0.631244556	7.32E-28	-0.530728341	1.08E-18	-0.183420198	0.004526997	-0.164719699	0.010921449	0.099816072	0.124632206	-0.388388845	5.45E-10	0.003294151	0.959682305
NCEH1	blue	0.410375745	4.39E-11	-0.410375745	4.39E-11	-0.214964679	0.000843953	-0.092247308	0.155999252	-0.302714746	1.96E-06	0.203386986	0.0016093	0.427086575	5.71E-12	0.128053843	0.048467222	-0.156401163	0.015734473	0.194599024	0.002568104	0.523456882	3.81E-18	0.450441844	2.71E-13	0.084824874	0.192207556	0.193717269	0.002688546	0.297550691	2.98E-06	-0.180462606	0.005232733	-0.338838384	8.36E-08	-0.038088736	0.558733995
ZBTB41	blue	0.640896842	6.33E-29	-0.640896842	6.33E-29	-0.460341204	6.94E-14	-0.488995238	1.04E-15	-0.54172516	1.50E-19	-0.204829667	0.001487689	0.286325023	7.18E-06	0.191024464	0.003088788	0.09375038	0.149338117	0.463579493	4.40E-14	0.797651218	9.71E-54	0.583780801	3.88E-23	0.058204665	0.371338749	0.086711622	0.182469036	0.099976679	0.124023957	0.146087836	0.024197823	-0.249461159	0.00010028	0.166020547	0.010300199
SNX16	blue	0.661108308	2.80E-31	-0.661108308	2.80E-31	-0.388414719	5.43E-10	-0.512058204	2.61E-17	-0.181509388	0.00497239	-0.12598363	0.052247481	0.350429263	2.78E-08	0.244016692	0.000143345	0.375792864	2.13E-09	0.798641943	5.80E-54	0.82293655	7.06E-60	0.735886143	7.61E-42	-0.422936247	9.57E-12	-0.106493036	0.101232279	-0.113097686	0.08165012	0.168315928	0.009279876	-0.154846041	0.016815885	0.098201039	0.130877826
PPIF	blue	-0.149621541	0.020937509	0.149621541	0.020937509	0.14065217	0.030063944	0.128864518	0.047050449	0.333660533	1.35E-07	0.42874222	4.63E-12	0.228463362	0.000380703	-0.045485309	0.484939378	0.157482212	0.015019007	-0.052197485	0.422801385	-0.313984198	7.65E-07	0.039448353	0.544772914	-0.127949186	0.048652694	-0.142647117	0.027783434	-0.010372945	0.873520932	-0.07086636	0.27620388	0.202986407	0.001644644	-0.109737397	0.091192974
PRKAR2B	blue	0.479835916	4.15E-15	-0.479835916	4.15E-15	-0.342666051	5.84E-08	-0.37118858	3.45E-09	-0.4683249	2.24E-14	-0.216513918	0.000772112	0.279406342	1.21E-05	0.29041559	5.23E-06	0.045919654	0.480775224	0.414072819	2.82E-11	0.730066219	6.76E-41	0.594486974	3.90E-24	0.003111704	0.961913568	0.378507569	1.59E-09	0.229147767	0.000365179	0.028568141	0.661026069	-0.326350973	2.61E-07	-0.142911391	0.027492746
PLA2G4A	blue	0.552928726	1.86E-20	-0.552928726	1.86E-20	-0.183382313	0.004535467	-0.227535422	0.000402729	-0.150222413	0.020422752	0.138446972	0.03276897	0.546623153	6.06E-20	0.103041517	0.112852553	0.19493014	0.002524157	0.64693631	1.31E-29	0.789589348	5.80E-52	0.723817225	6.62E-40	-0.288658569	6.00E-06	-0.170430599	0.008420262	0.01776129	0.785170904	0.004786074	0.941449906	-0.465282661	3.45E-14	0.071745208	0.27027688
INTS2	blue	0.675436827	4.61E-33	-0.675436827	4.61E-33	-0.151979521	0.018979906	-0.610761208	1.00E-25	-0.434093907	2.34E-12	-0.189705446	0.003303903	0.355522772	1.69E-08	0.230712699	0.000331868	0.147691745	0.02266744	0.652555361	2.92E-30	0.877489635	2.87E-77	0.733734404	1.72E-41	-0.192239665	0.002901922	0.005247417	0.935817676	0.095390119	0.14231975	0.079957879	0.21907014	-0.355251191	1.73E-08	0.057141839	0.380151323
MINOS1P1	blue	0.385177933	7.75E-10	-0.385177933	7.75E-10	-0.240404261	0.00018089	-0.256187383	6.38E-05	-0.475036729	8.44E-15	-0.332453272	1.50E-07	0.039578832	0.543442212	0.138646258	0.032516287	-0.056442984	0.386014972	0.076613404	0.23901886	0.421731462	1.11E-11	0.134045289	0.038790979	0.320873147	4.23E-07	0.220034538	0.000629328	0.20066426	0.001863891	0.025346266	0.697256185	-0.364240031	7.05E-09	0.142206062	0.028274441
ITGB1BP1	blue	0.098879509	0.128225299	-0.098879509	0.128225299	-0.015827813	0.808075697	0.007024556	0.914154058	0.049446308	0.447691697	-0.017222549	0.791535433	0.112800026	0.082461548	0.069647952	0.284565586	0.109706573	0.091284466	0.261739882	4.35E-05	0.253127852	7.85E-05	0.230518957	0.000335833	-0.221029812	0.000593635	-0.138182057	0.033107453	-0.003135454	0.9616231	0.02792361	0.668214305	-0.196681188	0.002302912	-0.065159706	0.316823523
ZNF367	blue	0.568422052	9.08E-22	-0.568422052	9.08E-22	-0.277219936	1.43E-05	-0.465367322	3.41E-14	-0.21841932	0.000691499	-0.236471623	0.000232097	0.212341021	0.000979809	0.217234074	0.000740676	0.262141427	4.23E-05	0.73489714	1.11E-41	0.850703596	7.38E-68	0.641965742	4.80E-29	-0.39074246	4.20E-10	-0.11820664	0.068699695	-0.013641531	0.834172648	0.187188736	0.00375233	-0.301542836	2.16E-06	0.01446793	0.824285184
EOGT	blue	0.546226553	6.53E-20	-0.546226553	6.53E-20	-0.346373329	4.11E-08	-0.574086948	2.90E-22	-0.4094084	4.93E-11	-0.186302261	0.003922924	0.246588246	0.000121207	0.203452403	0.001603595	-0.008875442	0.891658869	0.563864774	2.24E-21	0.767774838	1.59E-47	0.706106378	3.07E-37	-0.241813428	0.000165266	0.041712352	0.521914098	0.146843966	0.023465608	0.234365898	0.000264786	-0.078122269	0.229866691	-0.002203192	0.973028439
TIGD2	blue	0.636596414	1.90E-28	-0.636596414	1.90E-28	-0.255948975	6.48E-05	-0.471554239	1.40E-14	-0.27877629	1.27E-05	-0.306444242	1.44E-06	0.189735175	0.003298909	0.214200061	0.000881635	0.131003121	0.043478176	0.636527688	1.94E-28	0.790381399	3.91E-52	0.552317887	2.08E-20	-0.230614367	0.000333875	0.023286285	0.720792064	-0.003522268	0.956892945	0.191347525	0.003038074	-0.356498284	1.53E-08	0.201762219	0.001757101
FAM179B	blue	0.685990077	1.93E-34	-0.685990077	1.93E-34	-0.348972365	3.20E-08	-0.570865452	5.56E-22	-0.543716721	1.04E-19	-0.233777144	0.000274666	0.386167326	6.96E-10	0.175497189	0.006641953	0.069463351	0.285847157	0.582323843	5.28E-23	0.884785604	3.21E-80	0.755090235	3.68E-45	-0.025020003	0.700965278	0.081426413	0.210696937	0.102248223	0.115665589	0.129774351	0.045501775	-0.310679436	1.01E-06	0.146053058	0.024231969
ZNF112	blue	0.525276355	2.79E-18	-0.525276355	2.79E-18	-0.255941788	6.49E-05	-0.238422236	0.00020521	-0.173593275	0.007266488	-0.251034481	9.03E-05	0.204627987	0.001504168	0.16075203	0.013025378	0.183342284	0.004544431	0.622518796	6.22E-27	0.792168168	1.60E-52	0.490068982	8.79E-16	-0.265853491	3.26E-05	-0.073293723	0.260045785	-0.056793165	0.383069994	0.095248089	0.142917525	-0.54242579	1.32E-19	0.061009722	0.348691632
CYP4F3	blue	0.420185675	1.34E-11	-0.420185675	1.34E-11	-0.320660025	4.30E-07	-0.184928968	0.004201049	-0.003277504	0.959885879	-0.112315439	0.083796425	0.145595714	0.024684882	0.077700781	0.232397964	0.068479917	0.2927398	0.512911542	2.27E-17	0.54149916	1.56E-19	0.348220188	3.44E-08	-0.302088544	2.06E-06	-0.094326195	0.146844226	-0.002317321	0.971631829	-0.029071552	0.655433177	-0.299338097	2.58E-06	0.15610587	0.015935013
TMEM133	blue	0.493054383	5.53E-16	-0.493054383	5.53E-16	-0.073919181	0.255989868	-0.214018359	0.000890815	-0.334327323	1.27E-07	-0.107735458	0.097289056	0.367720732	4.94E-09	0.170174635	0.008520403	0.028247098	0.664602716	0.471277977	1.46E-14	0.772689727	1.76E-48	0.632825756	4.93E-28	-0.067037354	0.303049414	0.088025659	0.175904625	0.229864496	0.000349555	-0.021375796	0.742857955	-0.59170093	7.16E-24	-0.030967639	0.634541628
LOC283357	blue	0.54963543	3.46E-20	-0.54963543	3.46E-20	-0.25278476	8.03E-05	-0.317462393	5.68E-07	-0.464533673	3.84E-14	-0.240103734	0.000184395	0.295082067	3.62E-06	0.20262625	0.001677026	0.040965562	0.529399677	0.452501947	2.05E-13	0.816039806	4.14E-58	0.532611438	7.71E-19	0.046934973	0.471117112	0.190374116	0.003193213	0.116387096	0.073104946	0.055195303	0.396618987	-0.552669804	1.95E-20	0.046378621	0.476396126
RUNDC3B	blue	0.465739669	3.24E-14	-0.465739669	3.24E-14	-0.144227487	0.026083612	-0.283840251	8.68E-06	-0.402029475	1.17E-10	-0.42478622	7.61E-12	0.010792073	0.868455802	0.097197744	0.134877518	0.046458959	0.475631846	0.369628713	4.05E-09	0.684091673	3.45E-34	0.347655449	3.63E-08	0.043385251	0.505344027	0.084196291	0.195534868	0.11627511	0.073383406	0.131789721	0.042222844	-0.498497434	2.35E-16	0.083041751	0.201755188
CYP4X1	blue	0.176721402	0.006266152	-0.176721402	0.006266152	-0.015543358	0.811459819	-0.003845318	0.952943683	-0.058515985	0.368781435	0.035126945	0.589731281	0.164062636	0.011247645	0.015425956	0.812857559	-0.291331549	4.87E-06	0.201496109	0.001782457	0.353577419	2.04E-08	0.298801692	2.69E-06	-0.159284463	0.013889427	0.04778653	0.46309949	0.01696512	0.79458152	-0.053453106	0.411714717	-0.290934156	5.02E-06	-0.143441918	0.026917052
PCDHB16	blue	0.384710605	8.16E-10	-0.384710605	8.16E-10	-0.197585937	0.00219565	-0.157888509	0.014757565	-0.173778438	0.007203531	-0.333292476	1.39E-07	-0.053007539	0.415629148	0.049326371	0.448795274	0.175402284	0.00667191	0.312327158	8.81E-07	0.490185723	8.63E-16	0.186072594	0.003968248	-0.102401421	0.115118121	0.048587621	0.455626522	0.111040339	0.087392081	0.193094092	0.002776737	-0.394704344	2.69E-10	-0.034592134	0.59541131
SLC39A10	blue	0.528090645	1.71E-18	-0.528090645	1.71E-18	-0.041310685	0.525933546	-0.325224592	2.88E-07	-0.448317231	3.61E-13	-0.177890577	0.005925121	0.348969775	3.20E-08	0.187341568	0.003723605	0.113645191	0.080174426	0.469466586	1.90E-14	0.790327459	4.02E-52	0.581919626	5.74E-23	-0.009296824	0.886548925	0.118072402	0.069017112	0.132158568	0.041644778	-0.070767071	0.276878983	-0.589847834	1.07E-23	-0.004751725	0.941869369
TXNDC16	blue	0.565910921	1.50E-21	-0.565910921	1.50E-21	-0.158676164	0.01426206	-0.20910254	0.001175173	-0.287531772	6.54E-06	-0.019024998	0.770298433	0.433520813	2.52E-12	0.147758955	0.022605178	0.224154751	0.000493375	0.560886499	4.02E-21	0.814692359	8.98E-58	0.574934458	2.44E-22	-0.069745079	0.283892845	-0.02130005	0.743737291	-0.016478656	0.800346212	-0.109775485	0.091080023	-0.62801702	1.63E-27	0.055019461	0.398127383
IL32	blue	-0.477273806	6.07E-15	0.477273806	6.07E-15	0.234198663	0.000267559	0.45005686	2.86E-13	0.28299483	9.26E-06	0.204186437	0.001540832	-0.162510573	0.012052514	0.157474198	0.015024204	-0.117938793	0.06933423	-0.481828417	3.08E-15	-0.545912732	6.92E-20	-0.415727818	2.31E-11	0.114622807	0.077593046	0.482591932	2.74E-15	0.131003186	0.043478071	-0.18911324	0.003404822	0.185206188	0.004143514	-0.283172983	9.13E-06
ZNF639	blue	0.601851284	7.64E-25	-0.601851284	7.64E-25	-0.211572626	0.00102325	-0.303674769	1.81E-06	-0.237185266	0.0002219	-0.171404152	0.008048867	0.308296006	1.24E-06	0.181301351	0.005023184	0.216560932	0.000770023	0.674049423	6.93E-33	0.8645775	1.76E-72	0.641080078	6.03E-29	-0.254076398	7.36E-05	-0.066588848	0.306303057	-0.043745864	0.501808568	0.029180274	0.654227781	-0.495036401	4.06E-16	0.135226066	0.037090357
TRIM59	blue	0.633613362	4.05E-28	-0.633613362	4.05E-28	-0.368233785	4.68E-09	-0.428688514	4.66E-12	-0.281374689	1.05E-05	-0.197113876	0.002251034	0.279417276	1.21E-05	0.190049106	0.003246588	0.246372854	0.000122931	0.626637668	2.29E-27	0.796669359	1.61E-53	0.591860481	6.91E-24	-0.208217218	0.001234486	0.000856631	0.989511403	-0.073180367	0.260785571	0.151707082	0.019197646	-0.274785829	1.71E-05	0.171823981	0.007893258
CRYZ	blue	0.407370362	6.27E-11	-0.407370362	6.27E-11	-0.214062406	0.000888581	-0.426307774	6.29E-12	-0.282167617	9.86E-06	-0.086486781	0.183610105	0.301335722	2.19E-06	0.103116357	0.112589957	0.11105965	0.087336718	0.539731497	2.15E-19	0.621619054	7.73E-27	0.604253869	4.45E-25	-0.203175924	0.001627835	-0.045496544	0.484831424	-0.024755408	0.703978527	0.135586335	0.036584206	-0.177201899	0.006123929	0.010253726	0.87496264
TAPBP	blue	-0.395333348	2.51E-10	0.395333348	2.51E-10	-0.012124259	0.852392976	0.414972438	2.53E-11	0.165798554	0.010403953	0.57730889	1.50E-22	0.189867502	0.003276762	-0.125987632	0.052239944	-0.157762838	0.014838002	-0.509800213	3.79E-17	-0.581755512	5.94E-23	-0.321763737	3.91E-07	0.278130644	1.33E-05	-0.003441074	0.957885708	0.005957358	0.927156816	-0.086808723	0.181977867	0.313511854	7.97E-07	-0.065180949	0.316665445
ZSCAN31	blue	0.478189385	5.30E-15	-0.478189385	5.30E-15	-0.214473387	0.00086799	-0.225043751	0.000467863	0.009419078	0.885067254	0.026766599	0.68119385	0.362456305	8.45E-09	0.119235666	0.066305879	0.353149419	2.13E-08	0.631876635	6.25E-28	0.585281591	2.83E-23	0.53019717	1.18E-18	-0.335852471	1.10E-07	-0.185294813	0.004125271	-0.247922767	0.000111023	0.038114837	0.558464357	-0.296330335	3.28E-06	0.176654266	0.006286258
CIB1	blue	-0.163700259	0.011431199	0.163700259	0.011431199	0.12452868	0.055048313	0.034741422	0.593823287	0.078651068	0.226718587	0.060923663	0.349373207	-0.169221012	0.008902866	-0.00921368	0.887556814	-0.362611536	8.31E-09	-0.305205511	1.60E-06	-0.301850017	2.10E-06	-0.26332202	3.89E-05	0.024725809	0.704315891	0.11959746	0.065480639	0.160602941	0.013110947	-0.043490819	0.504307688	0.191998863	0.002938115	-0.063283314	0.330989765
ZNF302	blue	0.534256657	5.76E-19	-0.534256657	5.76E-19	-0.338588922	8.56E-08	-0.598918036	1.47E-24	-0.586359014	2.25E-23	-0.43784849	1.44E-12	0.108040803	0.096338867	0.247797911	0.000111941	0.003155654	0.961376051	0.403942798	9.35E-11	0.721826222	1.35E-39	0.496124202	3.42E-16	0.089205998	0.170158769	0.197462114	0.002210056	0.045806075	0.481862258	0.148770171	0.021686084	-0.111233225	0.086840355	0.171725389	0.007929558
CEP55	blue	0.431436634	3.29E-12	-0.431436634	3.29E-12	-0.185347936	0.004114371	-0.218788415	0.000676812	-0.234858381	0.000256778	0.146061501	0.024223676	0.485129906	1.87E-15	0.092546133	0.154657425	0.008872462	0.89169502	0.404618448	8.65E-11	0.627269188	1.96E-27	0.622121181	6.85E-27	-0.110487786	0.088988162	-0.042127101	0.517780284	0.202366752	0.001700717	-0.052332472	0.421601231	-0.26201191	4.27E-05	0.042434541	0.514726916
ICAM1	blue	-0.323054926	3.49E-07	0.323054926	3.49E-07	0.145789553	0.024492039	0.312734557	8.51E-07	0.260621751	4.70E-05	0.449813825	2.95E-13	0.111107857	0.087198635	0.013732295	0.833085401	-0.058218056	0.371228523	-0.175074276	0.00677638	-0.309889337	1.08E-06	-0.044259473	0.49679568	-0.141421423	0.029166315	0.002872388	0.96484077	0.180167756	0.00530824	-0.247372276	0.000115123	0.131105275	0.043313399	-0.414335614	2.74E-11
FAM46A	blue	0.346593228	4.02E-08	-0.346593228	4.02E-08	-0.35673905	1.50E-08	-0.394442767	2.77E-10	-0.127705129	0.049087511	-0.223117021	0.000524783	-0.057418643	0.377843952	0.189789316	0.003289831	0.126120864	0.051989525	0.397401838	1.98E-10	0.412124513	3.57E-11	0.327966212	2.26E-07	-0.352796216	2.21E-08	0.024959434	0.701654645	0.132163066	0.041637771	0.224698664	0.000477618	0.101837856	0.117142099	-0.096023114	0.139678777
HAUS3	blue	0.644993741	2.18E-29	-0.644993741	2.18E-29	-0.381569772	1.15E-09	-0.513747014	1.97E-17	-0.496246279	3.36E-16	-0.367761225	4.92E-09	0.219014335	0.000667965	0.192351186	0.002885297	0.100936915	0.120435256	0.554743655	1.31E-20	0.865979377	5.63E-73	0.585196051	2.88E-23	-0.026877229	0.679948646	0.057860846	0.374175696	0.121849005	0.060532128	0.258531513	5.43E-05	-0.363307066	7.75E-09	0.201308244	0.001800559
PLPPR4	blue	0.511534294	2.85E-17	-0.511534294	2.85E-17	-0.281240435	1.06E-05	-0.22775731	0.000397357	-0.33013843	1.86E-07	-0.239674564	0.000189512	0.223215509	0.000521725	0.138289934	0.032969262	0.118228268	0.068648666	0.421195314	1.19E-11	0.706630101	2.58E-37	0.498294782	2.43E-16	-0.053145947	0.414410859	0.027829588	0.669265447	0.072610746	0.264524932	0.061700757	0.343249196	-0.399221579	1.61E-10	-0.022301461	0.73213914
SPAG1	blue	0.404972542	8.30E-11	-0.404972542	8.30E-11	-0.096211279	0.13890099	-0.079632737	0.220955684	-0.158693894	0.014251076	-0.001251148	0.984681428	0.362698905	8.24E-09	0.002657594	0.967468433	0.147000761	0.023316187	0.458329967	9.18E-14	0.643326364	3.37E-29	0.55923451	5.54E-21	-0.124968952	0.054187943	-0.056961368	0.381660305	0.07700283	0.236632665	-0.12344652	0.057211221	-0.501511004	1.46E-16	-0.062246595	0.338988643
ABCB10	blue	0.620069773	1.12E-26	-0.620069773	1.12E-26	-0.298887296	2.67E-06	-0.46029177	6.98E-14	-0.311637356	9.34E-07	-0.097551602	0.133456263	0.451411262	2.38E-13	0.218498672	0.000688317	0.207638796	0.001274707	0.723332134	7.88E-40	0.882002753	4.52E-79	0.816510553	3.15E-58	-0.31871101	5.10E-07	-0.04189808	0.520060866	0.047172602	0.46887215	0.065868924	0.311573604	-0.343526773	5.38E-08	0.024834014	0.703082864
TNFRSF12A	blue	-0.396227408	2.27E-10	0.396227408	2.27E-10	0.50996837	3.69E-17	0.35668604	1.50E-08	0.213703383	0.000906936	0.417980372	1.76E-11	0.025897532	0.691005497	-0.123185966	0.05774235	-0.164853868	0.010855878	-0.454643327	1.53E-13	-0.543687906	1.04E-19	-0.295515922	3.50E-06	0.119934619	0.064719182	-0.117075234	0.071412649	0.177402689	0.006065357	-0.247788857	0.000112007	0.029345569	0.652396875	-0.208446428	0.001218872
HMMR	blue	0.561933855	3.28E-21	-0.561933855	3.28E-21	-0.496244352	3.36E-16	-0.57719737	1.53E-22	-0.506013171	7.05E-17	-0.271426253	2.18E-05	0.245786699	0.000127738	0.171032752	0.008188795	0.013123117	0.840388653	0.396062584	2.31E-10	0.665406079	8.36E-32	0.572171545	4.27E-22	0.006330094	0.922613026	0.109824477	0.090934897	0.261576574	4.40E-05	0.180686299	0.005176092	0.030189833	0.643077938	0.205357263	0.001445358
ZNF300P1	blue	0.270640362	2.31E-05	-0.270640362	2.31E-05	-0.15665267	0.015565412	-0.136071876	0.035911318	-0.080514361	0.215869714	-0.181094402	0.005074174	0.122202502	0.059783922	0.000269403	0.996701348	0.194878044	0.002531026	0.40057012	1.38E-10	0.480336875	3.85E-15	0.336965916	9.95E-08	-0.203308798	0.001616144	-0.072684235	0.264040448	-0.120349184	0.063792876	-0.017270284	0.79097094	-0.269552964	2.50E-05	-0.033555219	0.606494067
E2F8	blue	0.523499713	3.79E-18	-0.523499713	3.79E-18	-0.261247971	4.50E-05	-0.383368317	9.44E-10	-0.057279166	0.379005524	-0.084076539	0.196173486	0.308490854	1.22E-06	0.19323187	0.002757016	0.350047015	2.88E-08	0.744244824	2.98E-43	0.733038538	2.23E-41	0.654304076	1.82E-30	-0.4734453	1.07E-14	-0.162410673	0.012106016	-0.137788512	0.033615775	0.113504305	0.080552083	-0.177394473	0.006067744	0.086073989	0.18571868
ZNF770	blue	0.344133024	5.08E-08	-0.344133024	5.08E-08	-0.248640618	0.000105882	-0.338819473	8.37E-08	-0.182078477	0.004835791	-0.49024475	8.55E-16	0.034952832	0.59157774	0.185608884	0.004061202	0.168597156	0.009161243	0.471620913	1.39E-14	0.517754222	1.01E-17	0.371965538	3.18E-09	-0.231874559	0.000308988	-0.011467951	0.860299226	-0.019318468	0.766856361	0.336759035	1.01E-07	-0.177528151	0.006029014	0.032273797	0.620315225
PRRG1	blue	0.568002201	9.88E-22	-0.568002201	9.88E-22	-0.386012548	7.08E-10	-0.351281894	2.56E-08	-0.195413896	0.002461179	0.057063419	0.380806573	0.387927418	5.74E-10	0.090636138	0.163385584	0.109163344	0.09290896	0.609024296	1.50E-25	0.730567424	5.61E-41	0.712034792	4.14E-38	-0.322816559	3.56E-07	-0.068137769	0.295163611	0.094696601	0.145256784	0.062122178	0.339956798	-0.183919521	0.004416689	-0.066177672	0.309306031
ZMYM1	blue	0.552934882	1.85E-20	-0.552934882	1.85E-20	-0.309871628	1.08E-06	-0.349525586	3.03E-08	-0.169939861	0.008613182	-0.26538808	3.36E-05	0.190109109	0.003236673	0.248755819	0.000105078	0.180803801	0.005146561	0.644869549	2.25E-29	0.793219206	9.41E-53	0.521228249	5.59E-18	-0.311417326	9.51E-07	0.019486826	0.76488377	-0.0087079	0.893691844	0.085422393	0.189083208	-0.383475503	9.33E-10	0.143427715	0.026932329
NFXL1	blue	0.489414603	9.72E-16	-0.489414603	9.72E-16	-0.080791025	0.21429108	-0.345836617	4.32E-08	-0.503104913	1.13E-16	-0.149653247	0.02091007	0.389219399	4.97E-10	0.101159954	0.119613364	0.040010564	0.539050656	0.409491455	4.88E-11	0.74013348	1.49E-42	0.638529045	1.16E-28	0.124453647	0.055196064	0.030784465	0.636547644	0.16112134	0.012815527	-0.098222534	0.130793143	-0.436028458	1.83E-12	0.088081095	0.175631584
AKR1C3	blue	0.37935232	1.46E-09	-0.37935232	1.46E-09	-0.128429153	0.047806948	-0.34801056	3.51E-08	-0.214904174	0.000846879	-0.204827865	0.001487836	0.050734687	0.435933915	-0.066270038	0.308629774	0.244523778	0.000138701	0.29621827	3.31E-06	0.370069745	3.87E-09	0.23012208	0.000344093	-0.066574292	0.306409037	-0.155789088	0.016152626	0.183326866	0.004547888	0.081429125	0.210681689	-0.146641351	0.023659916	0.163874155	0.011342789
ORMDL1	blue	0.364622025	6.78E-09	-0.364622025	6.78E-09	-0.168981523	0.009001278	-0.318791492	5.06E-07	-0.50152434	1.45E-16	-0.087753538	0.177249459	0.362148362	8.71E-09	0.067201838	0.301861919	-0.097338495	0.134310814	0.216807739	0.00075914	0.502764879	1.19E-16	0.460229266	7.05E-14	0.218916192	0.000671795	0.151653548	0.019240685	0.139368092	0.031614877	-0.074222278	0.254040162	-0.236113827	0.000237372	0.132717924	0.040780856
MASTL	blue	0.609818485	1.25E-25	-0.609818485	1.25E-25	-0.211097829	0.00105097	-0.440830773	9.77E-13	-0.254480806	7.16E-05	-0.163407263	0.011581535	0.348699085	3.28E-08	0.353196657	2.12E-08	0.221073111	0.000592126	0.709316876	1.04E-37	0.837700044	6.21E-64	0.738293898	3.03E-42	-0.350919614	2.65E-08	-0.021097055	0.746095503	0.059642779	0.359616804	0.145807179	0.024474568	-0.354956702	1.79E-08	0.056835215	0.382717289
ZNF700	blue	0.598283435	1.69E-24	-0.598283435	1.69E-24	-0.277563505	1.39E-05	-0.475328209	8.08E-15	-0.477492369	5.87E-15	-0.220629932	0.000607745	0.385967399	7.11E-10	0.243245879	0.000150685	0.080664709	0.215010803	0.598516318	1.61E-24	0.874627651	3.67E-76	0.741056512	1.04E-42	-0.065441026	0.314734223	0.073510588	0.258634502	0.081846759	0.208343137	0.109444393	0.092065646	-0.369856941	3.96E-09	0.145096083	0.025187982
NFIL3	blue	0.348323954	3.41E-08	-0.348323954	3.41E-08	-0.08454584	0.193679439	-0.12339814	0.057309535	-0.318866925	5.03E-07	0.181168223	0.005055933	0.403292882	1.01E-10	-0.030368659	0.641111145	-0.033396352	0.608200135	0.108318207	0.095482039	0.332099789	1.55E-07	0.364645859	6.76E-09	0.154997047	0.01670811	0.025543188	0.69502096	0.392800371	3.34E-10	-0.034152347	0.600100636	-0.281763197	1.02E-05	0.076287313	0.241029905
CEP76	blue	0.619903536	1.17E-26	-0.619903536	1.17E-26	-0.284980605	7.96E-06	-0.389051482	5.07E-10	-0.185134738	0.004158275	0.001821662	0.977697802	0.492458532	6.07E-16	0.17948854	0.005485913	0.39084265	4.15E-10	0.748055171	6.53E-44	0.815652663	5.17E-58	0.699146057	3.03E-36	-0.31301796	8.31E-07	-0.136968718	0.034695985	-0.139638046	0.031283279	0.04900632	0.451747679	-0.438057678	1.40E-12	0.126109975	0.052009954
BUB1B	blue	0.479558435	4.32E-15	-0.479558435	4.32E-15	-0.020558107	0.752367923	-0.169598326	0.008749754	-0.171558821	0.007991224	-0.12827967	0.048069023	0.291124245	4.95E-06	0.115164802	0.076191159	0.135622694	0.03653345	0.460446722	6.83E-14	0.664829069	9.84E-32	0.469349379	1.93E-14	-0.140303971	0.030477946	-0.085519928	0.188576759	0.098165309	0.131018677	-0.006773161	0.917215133	-0.528949318	1.47E-18	0.126495499	0.051290713
PIGA	blue	0.463102472	4.70E-14	-0.463102472	4.70E-14	-0.11016283	0.089937662	-0.239145479	0.000196002	0.018098187	0.781198126	0.125923085	0.052361625	0.433138957	2.65E-12	0.130789871	0.043823849	0.268876039	2.62E-05	0.740354724	1.37E-42	0.697818149	4.66E-36	0.710284223	7.53E-38	-0.472419272	1.24E-14	-0.221216877	0.00058714	-0.067591311	0.299062409	0.069891534	0.282880461	-0.339366723	7.96E-08	-0.04777914	0.463168737
ARL13B	blue	0.545164794	7.94E-20	-0.545164794	7.94E-20	-0.342862026	5.73E-08	-0.398430293	1.77E-10	-0.250286071	9.49E-05	-0.059183831	0.363332302	0.412848295	3.27E-11	0.19698205	0.002266725	0.16084868	0.01297017	0.692168862	2.82E-35	0.817942736	1.37E-58	0.804083488	3.25E-55	-0.370474793	3.71E-09	-0.023338436	0.720192856	0.087245804	0.179779028	0.069904939	0.282787919	-0.236743041	0.000228168	-0.08434198	0.194759974
SOCS3	blue	-0.412567681	3.38E-11	0.412567681	3.38E-11	0.376998226	1.87E-09	0.437082266	1.59E-12	0.139520933	0.031426769	0.504620507	8.83E-17	0.133178808	0.040080409	-0.237661029	0.000215336	-0.224392686	0.000486424	-0.449056526	3.27E-13	-0.438912167	1.26E-12	-0.207822527	0.001261803	0.192048867	0.002930566	-0.014448456	0.824517869	0.297774783	2.92E-06	-0.26645016	3.12E-05	0.031468356	0.629071672	-0.278608505	1.29E-05
SRFBP1	blue	0.569436596	7.41E-22	-0.569436596	7.41E-22	-0.301498915	2.16E-06	-0.464586803	3.81E-14	-0.435739307	1.90E-12	-0.268364539	2.72E-05	0.308029188	1.26E-06	0.195684449	0.002426584	0.032631441	0.61644404	0.430604736	3.66E-12	0.646634975	1.41E-29	0.617749591	1.95E-26	-0.032914754	0.613384922	0.063962906	0.325812708	0.193150647	0.002768626	0.496318505	3.32E-16	-0.155785956	0.01615479	0.007733547	0.905528092
DIAPH2	blue	0.400018943	1.47E-10	-0.400018943	1.47E-10	0.049176777	0.450173899	-0.300398829	2.37E-06	-0.09720351	0.134854269	-0.297587761	2.97E-06	0.136757087	0.03497958	0.338096859	8.96E-08	0.216241713	0.000784311	0.592883347	5.54E-24	0.61096987	9.56E-26	0.464131869	4.07E-14	-0.321064295	4.16E-07	0.023543309	0.717840556	-0.039546542	0.54377138	0.290918952	5.03E-06	-0.447038252	4.29E-13	0.016173328	0.803969954
GSAP	blue	0.444772814	5.80E-13	-0.444772814	5.80E-13	-0.068551692	0.292233024	-0.469834923	1.80E-14	-0.565120844	1.75E-21	-0.045289903	0.486819088	0.457573016	1.02E-13	0.312485853	8.69E-07	-0.137712312	0.03371496	0.372267336	3.08E-09	0.706969808	2.30E-37	0.729818599	7.41E-41	0.041503679	0.524000316	0.31449536	7.33E-07	0.28183074	1.01E-05	-0.067773354	0.297759815	-0.319743892	4.66E-07	-0.09842758	0.129987484
GORAB	blue	0.583132462	4.45E-23	-0.583132462	4.45E-23	-0.264953389	3.47E-05	-0.519842145	7.08E-18	-0.585281887	2.83E-23	-0.237267467	0.000220753	0.317398156	5.71E-07	0.20268626	0.00167159	0.052401567	0.420987686	0.468742196	2.11E-14	0.824340143	3.02E-60	0.627947166	1.66E-27	0.082135569	0.206736918	0.112044213	0.084551119	0.103828136	0.110116368	0.102003307	0.116545044	-0.322709375	3.60E-07	0.133623519	0.039414183
BTBD3	blue	0.522257245	4.69E-18	-0.522257245	4.69E-18	-0.279912771	1.17E-05	-0.323810164	3.26E-07	-0.311019466	9.84E-07	-0.158227986	0.014542185	0.307342411	1.34E-06	0.172424483	0.007675335	0.120418082	0.063639988	0.541789357	1.48E-19	0.7687246	1.05E-47	0.612452462	6.77E-26	-0.193969135	0.00265363	0.028439835	0.662454574	0.185020344	0.004182006	0.054901275	0.39914313	-0.416595599	2.08E-11	-0.046563821	0.474635269
EIF3M	blue	0.308720203	1.19E-06	-0.308720203	1.19E-06	-0.168846471	0.009057199	-0.24438609	0.000139947	-0.281274648	1.05E-05	-0.336189698	1.07E-07	-0.080346895	0.216829301	0.098440093	0.129938445	0.079387916	0.222383047	0.175507018	0.006638857	0.380480051	1.29E-09	0.108174088	0.095926426	0.084296532	0.195001464	0.13298547	0.040372998	0.096189088	0.138992544	0.037894855	0.560738824	-0.243827281	0.000145117	0.017010047	0.794049691
PM20D2	blue	0.427798925	5.22E-12	-0.427798925	5.22E-12	-0.496653922	3.15E-16	-0.499628907	1.97E-16	-0.165490929	0.010549255	-0.27601184	1.56E-05	0.041026947	0.528782326	0.178785477	0.005675424	0.235552684	0.00024587	0.608029014	1.88E-25	0.599798655	1.21E-24	0.531051536	1.02E-18	-0.390258288	4.43E-10	-0.073840658	0.256496655	-0.131822189	0.04217169	0.306925529	1.39E-06	0.187175511	0.003754825	0.059842459	0.358007689
ABCA5	blue	0.591128626	8.10E-24	-0.591128626	8.10E-24	-0.167957814	0.009432913	-0.496422165	3.27E-16	-0.470746637	1.58E-14	-0.446541428	4.58E-13	0.18978928	0.003289837	0.204144023	0.001544396	0.148664869	0.02178026	0.533773871	6.27E-19	0.798339659	6.79E-54	0.540568505	1.85E-19	-0.004426191	0.945845511	0.043343296	0.505756195	-0.012407207	0.848988915	0.201843958	0.001749379	-0.418140942	1.73E-11	0.230555149	0.000335089
GAPDH	blue	-0.271102568	2.23E-05	0.271102568	2.23E-05	0.093909447	0.148645998	0.249379102	0.000100827	0.270904449	2.27E-05	0.404055837	9.23E-11	0.139235255	0.031779143	-0.10172842	0.117538325	-0.185995901	0.003983488	-0.310385544	1.04E-06	-0.437174693	1.57E-12	-0.174084488	0.007100537	-0.004755566	0.941822462	-0.105008295	0.1061093	0.13623979	0.035681067	-0.115856693	0.074431464	0.321687858	3.93E-07	-0.070569094	0.278228437
BPGM	blue	0.283758428	8.74E-06	-0.283758428	8.74E-06	-0.026153119	0.688114502	-0.146377718	0.023914815	-0.197295384	0.00222959	-0.004961049	0.939313405	0.179005209	0.005615574	0.123527469	0.057047034	0.156720295	0.015520227	0.299309944	2.58E-06	0.422308772	1.03E-11	0.383659647	9.15E-10	-0.087281929	0.179598176	-0.120811803	0.06277207	0.128688866	0.047354451	0.005298152	0.935198477	-0.284851547	8.04E-06	-0.114592958	0.077670854
FGF13	blue	0.303508404	1.84E-06	-0.303508404	1.84E-06	-0.224000353	0.000497935	-0.136468918	0.035368897	-0.055011189	0.398198426	-0.261194285	4.52E-05	5.88E-05	0.999280432	0.224956641	0.000470308	0.364903941	6.59E-09	0.469128172	1.99E-14	0.506123144	6.92E-17	0.265179213	3.41E-05	-0.256665491	6.17E-05	0.08684983	0.181770225	-0.089919002	0.166756276	0.026467884	0.684560356	-0.329611185	1.95E-07	-0.103134825	0.112525233
FLJ41455	blue	0.354604845	1.85E-08	-0.354604845	1.85E-08	-0.187553647	0.003684074	-0.150219398	0.020425308	0.032210111	0.621005683	-0.102730649	0.113948443	0.129456515	0.046037858	0.104323608	0.108419829	0.339703731	7.71E-08	0.507088824	5.91E-17	0.502129455	1.32E-16	0.314804818	7.14E-07	-0.342269962	6.06E-08	-0.186864331	0.003813965	-0.22165322	0.000572242	0.023384611	0.719662458	-0.259154969	5.20E-05	0.110741105	0.088253563
ZCCHC7	blue	0.541362474	1.60E-19	-0.541362474	1.60E-19	-0.159826778	0.013564445	-0.440508964	1.02E-12	-0.412528448	3.40E-11	-0.379712707	1.40E-09	0.037634558	0.563435849	0.134993659	0.037420005	0.100050488	0.123745202	0.453902903	1.69E-13	0.713267431	2.71E-38	0.415038068	2.51E-11	-0.014739495	0.821041999	0.042912851	0.509995087	0.007297875	0.910827467	0.188328498	0.003542846	-0.294275936	3.86E-06	0.105123929	0.10572294
KDSR	blue	0.529184207	1.41E-18	-0.529184207	1.41E-18	-0.631354367	7.12E-28	-0.422638858	9.93E-12	-0.17848168	0.005759112	-0.158003942	0.014684017	0.178690701	0.005701414	0.195147163	0.002495725	0.29960587	2.52E-06	0.661891542	2.25E-31	0.692934126	2.21E-35	0.592203541	6.42E-24	-0.358341342	1.28E-08	-0.0947685	0.144950168	-0.021358145	0.74306284	0.331855614	1.59E-07	0.025671324	0.693567916	0.036262942	0.577749358
RAD51AP1	blue	0.603909333	4.81E-25	-0.603909333	4.81E-25	-0.387120543	6.27E-10	-0.505955117	7.11E-17	-0.397486186	1.97E-10	-0.298096678	2.85E-06	0.261131569	4.54E-05	0.198196316	0.002125878	0.104962719	0.106261885	0.564674079	1.91E-21	0.808678783	2.65E-56	0.625239853	3.22E-27	-0.174320719	0.007021939	0.027724878	0.670436849	0.151591239	0.019290885	0.172493776	0.007650537	-0.259769876	4.99E-05	0.115037556	0.076518425
CDC7	blue	0.538855296	2.52E-19	-0.538855296	2.52E-19	-0.274077637	1.80E-05	-0.351944229	2.40E-08	-0.058280183	0.370717406	-0.096622723	0.137211819	0.268096153	2.77E-05	0.202142019	0.001721482	0.320770169	4.26E-07	0.740571706	1.26E-42	0.75161685	1.54E-44	0.63392356	3.74E-28	-0.480621559	3.69E-15	-0.150515191	0.020175933	-0.102095556	0.11621318	0.16426312	0.011147216	-0.214803237	0.000851783	0.07570151	0.244672308
BBS7	blue	0.646132519	1.62E-29	-0.646132519	1.62E-29	-0.269203215	2.56E-05	-0.292681519	4.38E-06	-0.196481739	0.00232719	-0.140799642	0.029890057	0.339976276	7.52E-08	0.214386709	0.000872296	0.308779366	1.19E-06	0.724098503	5.98E-40	0.892445243	1.53E-83	0.661415455	2.57E-31	-0.318197558	5.33E-07	-0.087997562	0.176043131	0.027000299	0.678564434	0.071941504	0.268964978	-0.536812286	3.64E-19	0.034779848	0.59341485
FAM13B	blue	0.631512	6.85E-28	-0.631512	6.85E-28	-0.309872449	1.08E-06	-0.627297474	1.94E-27	-0.430492085	3.71E-12	-0.199623604	0.001970544	0.320193758	4.48E-07	0.338216345	8.86E-08	0.135550857	0.03663379	0.63901902	1.03E-28	0.811370343	5.91E-57	0.729626227	7.95E-41	-0.231663872	0.000313025	0.111539046	0.085971318	0.057454074	0.377549231	0.274505837	1.74E-05	-0.20170807	0.001762234	0.008998681	0.890163921
PGAP1	blue	0.491998969	6.52E-16	-0.491998969	6.52E-16	-0.269817003	2.45E-05	-0.286506352	7.08E-06	0.000586437	0.992819552	-0.164609237	0.010975696	0.244112241	0.000142459	0.285978194	7.37E-06	0.451539648	2.34E-13	0.795573666	2.84E-53	0.767985528	1.45E-47	0.553317127	1.72E-20	-0.518974928	8.20E-18	-0.171533756	0.008000541	-0.21701474	0.000750123	0.072973713	0.262137958	-0.391113709	4.03E-10	0.03544069	0.586410697
KPNA5	blue	0.56023237	4.56E-21	-0.56023237	4.56E-21	-0.216502858	0.000772604	-0.317164443	5.83E-07	-0.410250517	4.46E-11	-0.292314915	4.51E-06	0.19397687	0.002652564	0.241089154	0.000173132	0.124915118	0.054292543	0.486182483	1.59E-15	0.797369027	1.12E-53	0.528100634	1.71E-18	-0.009641378	0.882374115	0.156996969	0.015336553	0.030015877	0.644993564	0.030519934	0.639449325	-0.462850926	4.87E-14	0.073638641	0.257803659
DPY19L4	blue	0.628289239	1.52E-27	-0.628289239	1.52E-27	-0.287116496	6.76E-06	-0.400340256	1.42E-10	-0.424616753	7.77E-12	-0.063006305	0.33311508	0.493160406	5.44E-16	0.150742404	0.019986173	0.003176106	0.961125911	0.51910909	8.02E-18	0.795258119	3.33E-53	0.72161217	1.46E-39	-0.068585527	0.291994337	0.004168839	0.948989824	0.107054959	0.099433444	0.091455574	0.159596834	-0.400251354	1.43E-10	0.155547874	0.016320063
ZNF260	blue	0.579545223	9.42E-23	-0.579545223	9.42E-23	-0.325400954	2.84E-07	-0.370545487	3.69E-09	-0.305682779	1.54E-06	-0.216667629	0.000765301	0.291026726	4.99E-06	0.169854302	0.008647216	0.149101796	0.021391792	0.674751974	5.64E-33	0.880988872	1.17E-78	0.686451208	1.67E-34	-0.215371319	0.000824522	-0.023158187	0.722264612	-0.047026573	0.470251038	0.1370397	0.034601304	-0.372715895	2.94E-09	0.114498695	0.077916986
KLHL5	blue	0.405371334	7.92E-11	-0.405371334	7.92E-11	0.06317689	0.331805256	-0.238388649	0.000205647	-0.613708767	5.05E-26	-0.288459576	6.09E-06	0.160732126	0.013036774	0.001077534	0.986806884	-0.236079056	0.00023789	0.087026234	0.180881163	0.582446642	5.14E-23	0.358675684	1.23E-08	0.429796578	4.05E-12	0.221722301	0.000569916	0.279840354	1.17E-05	0.061548287	0.344445356	-0.485189554	1.85E-15	0.151528498	0.019341549
ANGPT1	blue	0.459240073	8.09E-14	-0.459240073	8.09E-14	-0.313750184	7.81E-07	-0.516268951	1.29E-17	-0.475382127	8.02E-15	-0.321065867	4.15E-07	0.079090252	0.224127321	0.209395097	0.001156156	-0.166579879	0.010042829	0.293919456	3.97E-06	0.557877024	7.20E-21	0.477825362	5.59E-15	0.009736487	0.881222291	0.324945766	2.95E-07	0.232842823	0.000291051	0.293864795	3.99E-06	0.045334039	0.486394172	0.000196832	0.997589925
PLSCR4	blue	0.525442577	2.71E-18	-0.525442577	2.71E-18	-0.358769128	1.22E-08	-0.422222826	1.05E-11	-0.192593025	0.002849542	-0.158107625	0.01461823	0.268133972	2.77E-05	0.304891693	1.64E-06	0.275887228	1.58E-05	0.68336435	4.30E-34	0.735647746	8.33E-42	0.655779087	1.22E-30	-0.373379617	2.74E-09	-0.015980188	0.806264371	-0.124134544	0.055828093	0.183730685	0.004458118	-0.171052549	0.008181282	-0.038485261	0.554644537
CIPC	blue	0.404462682	8.81E-11	-0.404462682	8.81E-11	-0.132934935	0.040449771	-0.008610628	0.894872467	0.068202905	0.294701155	0.021567149	0.740638028	0.306355558	1.45E-06	0.087260056	0.179707662	0.231868458	0.000309104	0.614441012	4.26E-26	0.64791185	1.01E-29	0.516078748	1.34E-17	-0.321203455	4.10E-07	-0.168304853	0.009284576	-0.238081562	0.000209686	0.004257546	0.947905909	-0.513784327	1.96E-17	0.151057105	0.019725904
FAM200B	blue	0.524650783	3.11E-18	-0.524650783	3.11E-18	-0.12559572	0.052982389	-0.194812114	0.002539743	-0.089011028	0.171098117	-0.086625623	0.182904864	0.349869313	2.93E-08	0.12176965	0.060701145	0.293821331	4.00E-06	0.693194225	2.04E-35	0.799710101	3.32E-54	0.608987653	1.51E-25	-0.349855729	2.94E-08	-0.161602461	0.012546603	-0.108791505	0.094034152	-0.089423279	0.169116462	-0.543677519	1.05E-19	0.089632211	0.168118699
DCK	blue	0.553911247	1.54E-20	-0.553911247	1.54E-20	-0.396068952	2.31E-10	-0.436462906	1.73E-12	-0.230001185	0.000346647	-0.225105492	0.000466138	0.232973597	0.000288704	0.27441415	1.76E-05	0.273124592	1.93E-05	0.657087753	8.50E-31	0.779881802	6.33E-50	0.612230819	7.13E-26	-0.336371173	1.05E-07	0.164245781	0.01115587	0.015582506	0.810993865	0.197903508	0.002159093	-0.203465336	0.001602469	0.018557665	0.775788976
KLHL15	blue	0.515654941	1.44E-17	-0.515654941	1.44E-17	-0.101046815	0.12002973	-0.356879197	1.48E-08	-0.654988933	1.51E-30	-0.262849519	4.02E-05	0.19906257	0.002030323	0.006918383	0.915446713	-0.125399849	0.053356722	0.163245881	0.011665083	0.635460741	2.54E-28	0.366918506	5.36E-09	0.354436855	1.88E-08	0.16452371	0.011017862	0.326976197	2.47E-07	0.039901713	0.540156214	-0.493436548	5.21E-16	0.158072365	0.014640574
RAD54B	blue	0.496800276	3.08E-16	-0.496800276	3.08E-16	-0.177453756	0.006050541	-0.303354498	1.86E-06	-0.018178846	0.780247808	-0.143982174	0.026341461	0.281053685	1.07E-05	0.261659522	4.37E-05	0.299430562	2.56E-06	0.716788038	8.01E-39	0.720595263	2.10E-39	0.55638982	9.59E-21	-0.490552707	8.16E-16	-0.142683621	0.027743127	-0.124152823	0.055791729	0.057884817	0.37397747	-0.357416306	1.40E-08	0.117397568	0.070630995
TRMT13	blue	0.597259573	2.12E-24	-0.597259573	2.12E-24	-0.400450451	1.40E-10	-0.548763396	4.07E-20	-0.48305616	2.56E-15	-0.400971158	1.32E-10	0.208458301	0.001218068	0.245694971	0.000128506	0.091168143	0.16091821	0.484807144	1.96E-15	0.714674224	1.67E-38	0.535384339	4.71E-19	-0.022606576	0.728617267	0.073190789	0.260717496	0.035569801	0.585046724	0.562455206	2.96E-21	-0.186302555	0.003922866	0.230307364	0.000340214
ATP6V0D1	blue	-0.343997064	5.15E-08	0.343997064	5.15E-08	0.189645882	0.003313929	0.517085805	1.13E-17	0.532430235	7.96E-19	0.445774327	5.08E-13	-0.159705136	0.013636753	-0.184217972	0.004351918	0.103254677	0.112105887	-0.326888604	2.48E-07	-0.541061712	1.69E-19	-0.520689517	6.13E-18	-0.036755539	0.572589322	-0.129442123	0.046062256	-0.120855205	0.062676994	-0.256280074	6.34E-05	0.127792442	0.04893158	-0.067394486	0.300475022
SRSF11	blue	0.519331045	7.72E-18	-0.519331045	7.72E-18	-0.21913438	0.000663307	-0.536844614	3.62E-19	-0.321957345	3.84E-07	-0.490388936	8.36E-16	-0.061950736	0.341293775	0.168060837	0.00938866	0.186635216	0.003858045	0.507494552	5.54E-17	0.624221614	4.12E-27	0.36704509	5.29E-09	-0.171407841	0.008047488	-0.040032989	0.538823033	-0.077504529	0.233583254	0.54329186	1.12E-19	-0.124443775	0.055215527	0.210413143	0.001092161
TM2D1	blue	0.482510199	2.78E-15	-0.482510199	2.78E-15	-0.093049676	0.152416073	-0.214978957	0.000843263	-0.282993393	9.26E-06	-0.088081001	0.175632049	0.412865921	3.26E-11	0.142711136	0.027712776	0.091046325	0.161480706	0.527830174	1.79E-18	0.770944625	3.87E-48	0.639963809	8.05E-29	-0.124042613	0.056011285	0.055837529	0.391139074	0.022519129	0.729626067	-0.145415209	0.024865633	-0.567453345	1.10E-21	-0.030257077	0.642338073
TRIM6	blue	0.394657526	2.71E-10	-0.394657526	2.71E-10	-0.394688463	2.70E-10	-0.206877628	0.001329469	-0.113142961	0.081527265	-0.164022609	0.011267791	0.155737087	0.016188594	0.117811681	0.069637027	-0.042905865	0.51006404	0.444049629	6.39E-13	0.541966614	1.43E-19	0.418622817	1.63E-11	-0.252362752	8.26E-05	-0.003493407	0.957245823	0.022971008	0.724418155	0.146425779	0.023868171	-0.184987449	0.004188853	0.086141746	0.185371356
FANCL	blue	0.618801125	1.52E-26	-0.618801125	1.52E-26	-0.285438056	7.69E-06	-0.45464561	1.53E-13	-0.344927066	4.71E-08	-0.252845479	8.00E-05	0.242938965	0.000153704	0.193854654	0.002669449	0.120065049	0.064426568	0.654452049	1.75E-30	0.883966808	7.04E-80	0.643564927	3.17E-29	-0.235147748	0.000252178	-0.042108936	0.517960979	-0.034776827	0.593446958	0.146726754	0.023577846	-0.348421151	3.37E-08	0.129396499	0.046139675
NNT.AS1	blue	0.398914779	1.67E-10	-0.398914779	1.67E-10	-0.301101306	2.23E-06	-0.462499665	5.12E-14	-0.554917466	1.27E-20	-0.560102648	4.68E-21	-0.113198212	0.081377541	0.203034757	0.001640341	-0.099126296	0.127270836	0.212634258	0.000963683	0.555033511	1.24E-20	0.248659785	0.000105748	0.182514867	0.00473334	0.270118971	2.40E-05	0.120810517	0.06277489	0.26153132	4.41E-05	-0.146202196	0.024085832	0.111829376	0.085152778
ANKRD50	blue	0.577959688	1.31E-22	-0.577959688	1.31E-22	-0.264956882	3.47E-05	-0.435255505	2.02E-12	-0.219721899	0.000640943	-0.254994222	6.92E-05	0.12516027	0.053817566	0.113615137	0.080254867	0.203505711	0.001598959	0.67340892	8.36E-33	0.794959727	3.88E-53	0.588343856	1.47E-23	-0.322083842	3.80E-07	-0.105826122	0.103400524	-0.024570759	0.706084083	0.098692478	0.128952327	-0.276802675	1.47E-05	0.069635757	0.284650124
EXT1	blue	0.373119706	2.82E-09	-0.373119706	2.82E-09	-0.198143853	0.002131795	-0.233104067	0.00028638	-0.178063525	0.005876111	-0.438091119	1.40E-12	-0.150014488	0.020599624	0.151560801	0.01931545	0.229123478	0.00036572	0.366242186	5.75E-09	0.50347704	1.06E-16	0.159654019	0.013667239	-0.155362644	0.016449667	0.004986842	0.938998499	0.047175004	0.468849487	0.381871807	1.11E-09	-0.328799932	2.09E-07	-0.097019759	0.135596769
ARHGAP12	blue	0.54086332	1.75E-19	-0.54086332	1.75E-19	-0.179960894	0.005361798	-0.360891044	9.89E-09	-0.212063609	0.000995293	0.120242916	0.064029278	0.623561076	4.84E-27	0.307136223	1.36E-06	0.297811258	2.91E-06	0.710141224	7.90E-38	0.803433672	4.60E-55	0.80466103	2.38E-55	-0.299328901	2.58E-06	-0.064344272	0.32293055	-0.066012554	0.310517373	-0.003112023	0.961909663	-0.381645243	1.14E-09	0.018281886	0.779034276
CRY1	blue	0.531430821	9.50E-19	-0.531430821	9.50E-19	-0.34174252	6.37E-08	-0.448782623	3.39E-13	-0.23572204	0.000243276	-0.109260027	0.09261816	0.218803298	0.000676226	0.097569018	0.133386611	0.267622094	2.87E-05	0.595109788	3.41E-24	0.677094252	2.82E-33	0.603034317	5.86E-25	-0.280457428	1.12E-05	-0.0893734	0.169355311	-0.030785921	0.636531688	0.082387049	0.205345597	-0.102620034	0.114340395	0.016891928	0.795448162
PPP2CA	blue	0.463720469	4.31E-14	-0.463720469	4.31E-14	-0.22273972	0.000536654	-0.160525834	0.013155395	0.096359394	0.138291084	-0.10664346	0.100748233	0.18400235	0.004398627	0.172833587	0.007529956	0.348622772	3.31E-08	0.76732384	1.94E-47	0.734696633	1.20E-41	0.517408905	1.07E-17	-0.528666076	1.55E-18	-0.180697552	0.005173258	-0.20128662	0.001802653	0.10259994	0.114411708	-0.420276341	1.33E-11	-0.046354173	0.476628847
TC2N	blue	0.497515945	2.75E-16	-0.497515945	2.75E-16	-0.170577371	0.008363314	-0.304235692	1.73E-06	-0.078855242	0.225511292	0.059111435	0.363920571	0.440371219	1.04E-12	0.218424738	0.000691281	0.123429534	0.057245723	0.695192603	1.08E-35	0.725979714	3.03E-40	0.739440452	1.95E-42	-0.419210143	1.51E-11	-0.010202899	0.875577409	-0.021942948	0.736284545	0.103771597	0.110311282	-0.310284211	1.05E-06	-0.070335404	0.279827037
RIT1	blue	0.447892558	3.82E-13	-0.447892558	3.82E-13	-0.371346368	3.39E-09	-0.337055136	9.86E-08	-0.203247164	0.001621557	-0.144127928	0.026187996	0.360726733	1.01E-08	0.099642646	0.125291595	0.171050966	0.008181883	0.60649874	2.67E-25	0.662077802	2.13E-31	0.667521121	4.58E-32	-0.248836461	0.000104519	-0.04822902	0.458963361	-0.023670643	0.716379878	0.189221798	0.003386116	-0.14250386	0.027942109	0.016604029	0.798859469
WDR43	blue	0.222461515	0.000545566	-0.222461515	0.000545566	0.063899878	0.326290641	-0.022742576	0.72704927	0.089235493	0.170017	-0.138612184	0.032559373	0.029081395	0.65532401	0.095471783	0.141976909	0.242796989	0.000155119	0.429682147	4.11E-12	0.401812161	1.20E-10	0.245177842	0.000132918	-0.278902761	1.26E-05	-0.212670575	0.000961703	-0.111957453	0.084793681	0.143492265	0.026862961	-0.320640106	4.31E-07	-0.053688581	0.409654807
TAF1D	blue	0.543264409	1.13E-19	-0.543264409	1.13E-19	-0.137681268	0.03375544	-0.418884978	1.58E-11	-0.318222333	5.32E-07	-0.148114553	0.022278211	0.248409325	0.000107514	0.194200547	0.002621913	0.169120502	0.008944051	0.487434551	1.32E-15	0.661558622	2.47E-31	0.54052882	1.86E-19	-0.104951981	0.106297859	0.016631993	0.798527953	0.100888309	0.120614949	0.061708925	0.343185192	-0.3071734	1.36E-06	0.140143935	0.030669851
THAP1	blue	0.63041467	9.00E-28	-0.63041467	9.00E-28	-0.203009093	0.001642624	-0.480694855	3.65E-15	-0.572991346	3.62E-22	-0.177248146	0.006110393	0.401198723	1.29E-10	0.196728768	0.002297154	0.078098746	0.230007439	0.429340514	4.30E-12	0.783096491	1.37E-50	0.638367169	1.21E-28	0.093652168	0.149766667	0.139194084	0.031830204	0.224204973	0.0004919	-0.029789206	0.647493194	-0.416009206	2.24E-11	0.130302344	0.044622787
CHURC1	blue	0.223072531	0.00052617	-0.223072531	0.00052617	-0.163696327	0.011433205	-0.318485309	5.20E-07	-0.169167993	0.00892457	-0.072866427	0.262841959	0.107628757	0.097622843	0.112445071	0.08343764	0.022618068	0.72848472	0.275943772	1.57E-05	0.3153297	6.82E-07	0.283196523	9.12E-06	-0.089682933	0.167877137	0.083624895	0.198595691	-0.064813653	0.319405966	0.272495913	2.02E-05	0.036359841	0.576732608	0.07123368	0.273716023
SLC26A2	blue	0.28988911	5.45E-06	-0.28988911	5.45E-06	-0.352412695	2.29E-08	-0.229027282	0.000367869	-0.109502416	0.091892303	-0.095405628	0.14225459	0.173203954	0.007400464	0.058907369	0.365581931	-0.107311949	0.098619257	0.373960551	2.58E-09	0.406374236	7.04E-11	0.416597327	2.08E-11	-0.216452013	0.000774871	-0.038090898	0.558711652	-0.087169535	0.1801613	0.314505181	7.32E-07	-0.001476658	0.981920808	0.106857604	0.100062311
THAP9.AS1	blue	0.410671981	4.24E-11	-0.410671981	4.24E-11	-0.235479776	0.000246995	-0.31258336	8.62E-07	-0.305119982	1.61E-06	0.080505833	0.215918506	0.456997169	1.10E-13	0.188398619	0.00353031	0.052989772	0.415785688	0.514001994	1.89E-17	0.689535916	6.43E-35	0.680327007	1.08E-33	-0.151860348	0.019074886	-0.040586068	0.533224271	0.043490743	0.504308433	0.096806663	0.136461767	-0.224836645	0.000473695	0.073482605	0.258816306
POC1B	blue	0.58295651	4.62E-23	-0.58295651	4.62E-23	-0.371764341	3.25E-09	-0.621486948	7.98E-27	-0.376984282	1.87E-09	-0.218564397	0.000685691	0.187861494	0.003627367	0.205109626	0.001465088	0.11106214	0.087329581	0.583014646	4.56E-23	0.704741501	4.84E-37	0.707687948	1.81E-37	-0.255775735	6.56E-05	0.032689499	0.615816617	0.05723943	0.379336845	0.233295999	0.000282993	0.11374569	0.079905902	0.087011325	0.180956177
ZUFSP	blue	0.62794538	1.66E-27	-0.62794538	1.66E-27	-0.153274435	0.017974065	-0.542212517	1.37E-19	-0.410463763	4.35E-11	-0.237878846	0.000212392	0.337712837	9.28E-08	0.211386266	0.001034049	0.102815704	0.11364778	0.624861988	3.53E-27	0.837323119	7.97E-64	0.736770449	5.44E-42	-0.176251349	0.006408136	0.01900892	0.770487136	0.143622943	0.026722997	0.145419907	0.024860914	-0.329790328	1.92E-07	0.108081009	0.096214304
SMC2	blue	0.581972422	5.68E-23	-0.581972422	5.68E-23	-0.155772751	0.016163918	-0.330707934	1.76E-07	-0.179654036	0.005442137	0.062820987	0.334541778	0.581206618	6.67E-23	0.227531023	0.000402836	0.194655446	0.002560567	0.724210004	5.75E-40	0.844408199	6.51E-66	0.793804735	6.99E-53	-0.341083776	6.78E-08	-0.122639907	0.058868684	-0.004098257	0.949852331	0.020326847	0.755064402	-0.447748064	3.90E-13	0.054009671	0.406855784
LARP7	blue	0.540180409	1.98E-19	-0.540180409	1.98E-19	-0.467316868	2.58E-14	-0.468338785	2.23E-14	-0.327298968	2.40E-07	-0.394515043	2.75E-10	0.099122651	0.127284892	0.238387994	0.000205656	0.20584841	0.001406947	0.492431015	6.10E-16	0.639408782	9.28E-29	0.457708695	1.00E-13	-0.131125368	0.04328105	0.09719878	0.13487334	-0.010215525	0.875424686	0.342703879	5.82E-08	-0.057951321	0.37342787	0.120244488	0.064025776
CPSF6	blue	0.352469028	2.28E-08	-0.352469028	2.28E-08	-0.179204364	0.005561818	-0.358082665	1.31E-08	-0.252786443	8.03E-05	0.052424929	0.420780358	0.336062964	1.08E-07	0.245724125	0.000128262	0.185574232	0.004068227	0.434087196	2.35E-12	0.562909907	2.71E-21	0.529991516	1.22E-18	-0.151372983	0.019467624	0.032191611	0.621206303	-0.083913966	0.197042887	-0.109039336	0.093283012	-0.099194121	0.12700948	0.000225913	0.997233843
ZBTB21	blue	0.553514993	1.66E-20	-0.553514993	1.66E-20	-0.209824863	0.001128732	-0.512115323	2.59E-17	-0.421710052	1.11E-11	-0.407379088	6.26E-11	-0.013872457	0.831407038	0.052198826	0.422789453	0.06559343	0.313606113	0.409124419	5.09E-11	0.606785246	2.50E-25	0.389574781	4.78E-10	-0.01551648	0.811779767	0.002543672	0.96886223	0.166551184	0.010055893	0.457813673	9.86E-14	-0.173855311	0.007177536	0.07909098	0.224123041
PRPS2	blue	0.439927673	1.10E-12	-0.439927673	1.10E-12	-0.445876057	5.01E-13	-0.534859361	5.17E-19	-0.392377122	3.50E-10	-0.310210063	1.05E-06	0.236541069	0.000231085	0.066280537	0.308552965	0.006452054	0.921126818	0.413896303	2.88E-11	0.541891363	1.45E-19	0.548131429	4.58E-20	-0.11040831	0.08921964	0.07046724	0.278924425	0.151673432	0.019224689	0.390514436	4.31E-10	0.051922027	0.425256613	0.073253143	0.260310451
PEX3	blue	0.665836618	7.40E-32	-0.665836618	7.40E-32	-0.357028205	1.45E-08	-0.564064439	2.16E-21	-0.212526551	0.000969578	-0.124509012	0.055087009	0.353207318	2.12E-08	0.243229966	0.00015084	0.327026043	2.45E-07	0.796627293	1.65E-53	0.833730216	8.37E-63	0.787111566	1.97E-51	-0.419523582	1.46E-11	-0.050989661	0.433628171	-0.087873275	0.176656777	0.162543543	0.012034902	-0.116002196	0.074065634	0.130951287	0.043561986
ZNF559	blue	0.426496533	6.14E-12	-0.426496533	6.14E-12	-0.186650324	0.003855125	-0.228857363	0.000371693	-0.413286611	3.10E-11	-0.252190095	8.36E-05	0.242833478	0.000154754	0.33039994	1.81E-07	0.032027217	0.622990357	0.328641638	2.12E-07	0.641089702	6.02E-29	0.411096855	4.03E-11	0.117446753	0.070512339	0.300745609	2.30E-06	0.134165622	0.03861471	0.082066243	0.207121656	-0.530791619	1.06E-18	-0.007943741	0.902972837
RIMKLB	blue	0.41676706	2.04E-11	-0.41676706	2.04E-11	-0.220696864	0.000605362	-0.165135047	0.010719587	-0.023611025	0.717063639	-0.070600598	0.278013404	0.217087655	0.00074697	0.273330964	1.90E-05	0.201260362	0.001805199	0.609227482	1.43E-25	0.665377554	8.43E-32	0.520384633	6.45E-18	-0.396357727	2.23E-10	-0.03732643	0.56663648	-0.050859732	0.434802248	0.015994191	0.80609796	-0.373479657	2.71E-09	-0.047001437	0.470488616
TMEM150C	blue	0.152587094	0.018502033	-0.152587094	0.018502033	-0.047738262	0.463551916	-0.107865896	0.096882244	0.052251163	0.422323907	-0.150396319	0.020275832	-0.006111186	0.925281295	0.092496164	0.154881191	-0.06002509	0.356539911	0.42986311	4.02E-12	0.407504422	6.17E-11	0.324663067	3.03E-07	-0.345304005	4.55E-08	0.019404146	0.76585232	-0.207402207	0.001291503	0.043539734	0.503827878	-0.19535197	0.002469161	-0.024621882	0.705500899
C11orf54	blue	0.547193738	5.45E-20	-0.547193738	5.45E-20	-0.324405683	3.10E-07	-0.381596272	1.14E-09	-0.344958358	4.70E-08	-0.355110332	1.76E-08	0.135328784	0.036945446	0.055524198	0.393806899	0.091867542	0.157717176	0.442859442	7.48E-13	0.636370798	2.02E-28	0.470534117	1.63E-14	-0.02384077	0.714429914	-0.035316065	0.587728661	3.58E-06	0.999956127	0.455507757	1.36E-13	-0.185096916	0.004166108	0.258167208	5.57E-05
PGGT1B	blue	0.504067998	9.65E-17	-0.504067998	9.65E-17	-0.23354158	0.000278714	-0.443100532	7.24E-13	-0.28520677	7.82E-06	-0.078991549	0.224707843	0.370779184	3.60E-09	0.111488985	0.086113094	0.124489413	0.055125594	0.56313698	2.59E-21	0.68983659	5.86E-35	0.684035595	3.50E-34	-0.199672754	0.001965384	-0.048420486	0.457180044	-0.033620885	0.605789505	0.207776469	0.001265027	-0.116473598	0.072890442	0.103415984	0.111543435
ABCA13	blue	0.294746522	3.72E-06	-0.294746522	3.72E-06	-0.148641408	0.021801291	-0.044384921	0.495575333	0.013557468	0.835179914	0.010575625	0.871070904	0.217575452	0.000726191	0.103536516	0.111124603	0.142103279	0.028389925	0.381491086	1.16E-09	0.419362897	1.49E-11	0.371907618	3.20E-09	-0.274730725	1.72E-05	0.05102657	0.433294982	0.044125003	0.498105558	-0.080716049	0.21471807	-0.305516787	1.56E-06	-0.163184508	0.011696995
ZNF711	blue	0.439756957	1.12E-12	-0.439756957	1.12E-12	-0.144914822	0.025372668	-0.11337932	0.080888318	-0.007952059	0.902871743	-0.078796499	0.225858176	0.316812925	6.01E-07	0.222380658	0.000548182	0.400928039	1.33E-10	0.702879233	8.96E-37	0.753874081	6.09E-45	0.504053885	9.68E-17	-0.379335121	1.46E-09	-0.096383625	0.1381915	-0.200809159	0.001849466	0.000617212	0.992442743	-0.605711677	3.20E-25	-0.03453933	0.595973467
GPRASP1	blue	0.456304933	1.22E-13	-0.456304933	1.22E-13	-0.511258756	2.98E-17	-0.382057992	1.09E-09	-0.289361758	5.68E-06	-0.360700453	1.01E-08	0.014296792	0.826330551	0.237156751	0.000222299	0.179893664	0.005379308	0.483005882	2.58E-15	0.629826519	1.04E-27	0.380463666	1.29E-09	-0.143860604	0.026470053	0.220559409	0.000610265	-0.064760243	0.319805755	0.307021791	1.37E-06	-0.141210167	0.029410515	0.05356094	0.410770641
CAAP1	blue	0.580656624	7.48E-23	-0.580656624	7.48E-23	0.00113986	0.986043849	-0.254989326	6.92E-05	-0.213347213	0.00092549	-0.198877105	0.002050446	0.196075102	0.00237741	0.155272631	0.016512971	0.153617202	0.01771571	0.580884591	7.13E-23	0.810708563	8.57E-57	0.520774253	6.04E-18	-0.208451982	0.001218496	-0.050233212	0.440489222	0.011531795	0.859529505	0.040452641	0.534572263	-0.598905495	1.47E-24	0.039916648	0.540004464
ANKRD46	blue	0.600202696	1.10E-24	-0.600202696	1.10E-24	-0.258542261	5.43E-05	-0.429710135	4.10E-12	-0.519017526	8.14E-18	-0.182320902	0.004778633	0.258189792	5.56E-05	0.011503301	0.859873023	0.105131098	0.105699025	0.374478408	2.44E-09	0.701469438	1.42E-36	0.47078067	1.57E-14	0.147673664	0.022684215	-0.032844555	0.614142291	0.050401951	0.438953409	0.020979	0.747468046	-0.354323553	1.90E-08	0.224055883	0.000496291
TXNL1	blue	0.479994521	4.05E-15	-0.479994521	4.05E-15	-0.159029935	0.014044295	-0.306820221	1.40E-06	-0.416507136	2.10E-11	-0.422773335	9.77E-12	0.076185781	0.241658478	0.01396218	0.83033306	-0.034074825	0.600928947	0.280613565	1.11E-05	0.568663565	8.65E-22	0.274697544	1.72E-05	0.156630532	0.015580229	0.02524998	0.698350057	0.077189065	0.235497447	0.415110721	2.49E-11	-0.392491469	3.45E-10	0.291127505	4.95E-06
NCKAP5	blue	0.488866964	1.06E-15	-0.488866964	1.06E-15	-0.267857493	2.82E-05	-0.194782957	0.002543607	-0.082701381	0.203616072	-0.112152083	0.084250316	0.189991827	0.003256078	0.226750987	0.000422266	0.232132588	0.00030411	0.58492649	3.05E-23	0.685051524	2.57E-34	0.498468865	2.36E-16	-0.326611426	2.55E-07	-0.027676256	0.670981052	-0.125385126	0.053384947	0.14645714	0.023837776	-0.344258696	5.02E-08	-0.058327035	0.370332245
ATP2B1	blue	0.507690139	5.36E-17	-0.507690139	5.36E-17	-0.321271778	4.08E-07	-0.613702153	5.06E-26	-0.485993237	1.64E-15	-0.273467353	1.88E-05	0.151741398	0.019170101	0.139606974	0.031321295	0.089116557	0.17058921	0.376100333	2.06E-09	0.555610242	1.11E-20	0.516608921	1.22E-17	0.002953396	0.963849855	0.079224265	0.223340823	0.180503211	0.00522241	0.472757613	1.18E-14	0.101691926	0.117670689	0.09885283	0.128328811
AIMP1	blue	0.604706898	4.01E-25	-0.604706898	4.01E-25	-0.245708072	0.000128396	-0.424038262	8.35E-12	-0.292563241	4.42E-06	0.035494653	0.585840434	0.562367898	3.01E-21	0.217146459	0.000744436	0.20190312	0.001743809	0.715116046	1.43E-38	0.859774225	7.98E-71	0.848644295	3.27E-67	-0.283987081	8.59E-06	-0.076431009	0.24014226	-0.003068703	0.962439503	0.041650873	0.5225283	-0.315036497	7.00E-07	0.072520441	0.265121102
LSM5	blue	0.571249817	5.15E-22	-0.571249817	5.15E-22	-0.198219074	0.002123316	-0.359471123	1.14E-08	-0.371902223	3.20E-09	-0.415267233	2.44E-11	-0.019734338	0.761986511	0.079517096	0.221629086	0.167127264	0.009796482	0.427292452	5.56E-12	0.721130367	1.73E-39	0.304465822	1.70E-06	-0.000568957	0.993033573	0.055049397	0.397870346	0.113903201	0.079486511	0.116121883	0.073765811	-0.471044568	1.51E-14	0.133790704	0.039166149
NAP1L5	blue	0.560314747	4.49E-21	-0.560314747	4.49E-21	-0.130385569	0.044485544	-0.195727916	0.002421067	-0.198099984	0.002136754	-0.158356219	0.014461547	0.241211429	0.00017178	0.175737821	0.006566534	0.184484926	0.004294709	0.578892571	1.08E-22	0.779760267	6.70E-50	0.542387362	1.32E-19	-0.211155215	0.001047583	0.019663207	0.762818805	0.071563536	0.271494928	0.033959824	0.60215866	-0.625230134	3.22E-27	-0.036761935	0.572522461
ZNF184	blue	0.643753803	3.01E-29	-0.643753803	3.01E-29	-0.427523958	5.40E-12	-0.601464879	8.33E-25	-0.54996836	3.25E-20	-0.360179423	1.06E-08	0.185436801	0.004096194	0.169324302	0.008860717	0.123771435	0.056554559	0.523037483	4.10E-18	0.823523415	4.96E-60	0.582329934	5.27E-23	-0.009235611	0.887290949	0.079607545	0.221102262	0.045662525	0.483238027	0.284070239	8.53E-06	-0.194700475	0.002554566	0.167831349	0.009487489
FPGT	blue	0.600449241	1.05E-24	-0.600449241	1.05E-24	-0.453160352	1.87E-13	-0.444332798	6.15E-13	-0.279126644	1.24E-05	0.0208984	0.748405586	0.508939849	4.37E-17	0.156370303	0.015755327	0.178863928	0.00565399	0.684679696	2.88E-34	0.815842524	4.64E-58	0.81330934	1.98E-57	-0.283277029	9.06E-06	-0.042203773	0.517017933	0.013992915	0.82996523	0.149106497	0.021387645	-0.131991669	0.041905516	0.067114782	0.302490041
EPS8	blue	0.567338633	1.13E-21	-0.567338633	1.13E-21	-0.232963342	0.000288888	-0.444403563	6.10E-13	-0.559183292	5.60E-21	-0.304516703	1.69E-06	0.286529742	7.07E-06	0.164559659	0.011000121	0.043519896	0.504022438	0.415440971	2.39E-11	0.755201413	3.51E-45	0.580061315	8.46E-23	0.107411965	0.098303822	0.099309311	0.126566566	0.091896842	0.157584128	0.125661408	0.052857341	-0.4281653	4.98E-12	0.143138245	0.0272453
ADCYAP1	blue	0.188637029	0.003487988	-0.188637029	0.003487988	-0.12767807	0.049135917	-0.095245416	0.142928794	-0.200783742	0.001851989	-0.04602201	0.479796744	0.133983363	0.038881957	0.10583252	0.103379551	0.004610415	0.943595195	0.124377779	0.055345791	0.290212528	5.31E-06	0.237355084	0.000219536	0.032742469	0.615244403	0.31293006	8.37E-07	0.188677708	0.003480813	-0.004336685	0.946939	-0.170589292	0.008358703	0.022893667	0.725308627
PIBF1	blue	0.541116989	1.67E-19	-0.541116989	1.67E-19	-0.099226617	0.126884408	-0.303417155	1.85E-06	-0.374790934	2.36E-09	-0.123908553	0.056279317	0.430154851	3.87E-12	0.143219173	0.027157489	0.037736323	0.562380689	0.561423884	3.62E-21	0.832780368	1.54E-62	0.706052516	3.13E-37	-0.120028863	0.064507639	-0.009381052	0.885528081	0.049986851	0.442737016	0.086690696	0.182575012	-0.513154025	2.18E-17	0.041481117	0.524226127
AHSA2	blue	0.38562031	7.39E-10	-0.38562031	7.39E-10	-0.023819596	0.714672507	-0.3102251	1.05E-06	-0.296983546	3.11E-06	-0.205044309	0.001470333	0.192024653	0.002934219	0.279910411	1.17E-05	0.074683419	0.251093563	0.433480159	2.54E-12	0.621920159	7.19E-27	0.480959344	3.51E-15	-0.116628735	0.072507021	0.068439619	0.293024583	0.025543594	0.695016349	0.001892605	0.976829499	-0.350287106	2.82E-08	0.033233255	0.609953829
GINS1	blue	0.486248973	1.58E-15	-0.486248973	1.58E-15	-0.231473444	0.000316716	-0.210657862	0.001077271	-0.073042606	0.261686573	-0.219384994	0.000653681	0.10848209	0.094978703	0.119862387	0.0648817	0.184834033	0.004220918	0.496069239	3.45E-16	0.605390287	3.44E-25	0.36512595	6.44E-09	-0.25556953	6.65E-05	-0.111562493	0.085904979	-0.023361068	0.719932866	0.086052363	0.185829634	-0.358379978	1.27E-08	0.114460395	0.07801717
FLRT3	blue	0.307809359	1.29E-06	-0.307809359	1.29E-06	-0.24138243	0.000169906	-0.288606408	6.02E-06	-0.040638829	0.532691707	-0.190232573	0.003216359	0.019012423	0.770446026	0.200883519	0.001842104	0.378078154	1.67E-09	0.482096974	2.96E-15	0.451168175	2.46E-13	0.278324464	1.32E-05	-0.330556998	1.79E-07	-0.11361333	0.080259705	0.054032109	0.406660616	0.241649031	0.000167022	-0.125816135	0.052563761	0.068012584	0.296053763
ZNF571	blue	0.491202601	7.38E-16	-0.491202601	7.38E-16	-0.280924921	1.08E-05	-0.368240059	4.68E-09	-0.309825352	1.09E-06	-0.297344214	3.03E-06	0.230131299	0.000343899	0.226294384	0.000434039	0.14639634	0.023896733	0.611118239	9.23E-26	0.801802863	1.10E-54	0.581978267	5.67E-23	-0.222064749	0.000558514	0.027140826	0.6769852	-0.023385173	0.719656003	0.002283994	0.972039648	-0.395400234	2.49E-10	0.02325628	0.721136886
RMI1	blue	0.656920395	8.90E-31	-0.656920395	8.90E-31	-0.375227025	2.26E-09	-0.502399082	1.26E-16	-0.344019127	5.14E-08	-0.199449935	0.001988875	0.32698629	2.46E-07	0.215413666	0.000822523	0.182596912	0.004714297	0.696992712	6.08E-36	0.888696341	6.93E-82	0.676419376	3.45E-33	-0.222434957	0.000546424	-0.060003767	0.356711085	0.00874583	0.893231534	0.120522774	0.06340825	-0.323160637	3.46E-07	0.158480745	0.014383616
PIGK	blue	0.48525232	1.84E-15	-0.48525232	1.84E-15	-0.022405921	0.730932745	-0.328759082	2.10E-07	-0.581135032	6.77E-23	0.02933777	0.65248321	0.401254478	1.28E-10	0.124811722	0.054493909	-0.102814065	0.113653567	0.201988043	0.001735842	0.636719529	1.84E-28	0.488775503	1.07E-15	0.292720766	4.37E-06	0.160926287	0.012925987	0.221826295	0.000566431	-0.085162368	0.190438242	-0.419500971	1.46E-11	0.117360848	0.070719686
PRDX5	blue	-0.193495898	0.002719578	0.193495898	0.002719578	0.099886875	0.124363777	0.306282299	1.46E-06	0.431176902	3.40E-12	0.478441229	5.10E-15	-0.058488277	0.369008598	-0.214746341	0.000854558	-0.041822371	0.520815901	-0.143831241	0.026501192	-0.336682965	1.02E-07	-0.317171109	5.82E-07	-0.120949233	0.062471419	-0.230503209	0.000336157	-0.305041259	1.62E-06	-0.141139218	0.029492918	0.136728214	0.035018423	0.061639496	0.34372949
TMA16	blue	0.607043292	2.36E-25	-0.607043292	2.36E-25	-0.350216093	2.84E-08	-0.516361929	1.27E-17	-0.358267098	1.29E-08	-0.080316496	0.217003813	0.235206829	0.000251248	0.23866632	0.000202058	0.209228667	0.00116694	0.510364253	3.46E-17	0.692652383	2.42E-35	0.592486306	6.04E-24	-0.169720089	0.008700845	0.040296263	0.536154296	0.079880561	0.219517474	0.133342865	0.039833537	-0.057832312	0.374411733	0.0301653	0.643347961
GDAP1	blue	0.56260752	2.87E-21	-0.56260752	2.87E-21	-0.093766999	0.149265691	-0.288344628	6.14E-06	-0.173098451	0.007437148	-0.041892201	0.520119471	0.401525567	1.24E-10	0.239300385	0.000194081	0.194979525	0.002517662	0.625671851	2.89E-27	0.773507203	1.21E-48	0.616813585	2.43E-26	-0.266694753	3.07E-05	-0.006466441	0.920951515	-0.023791504	0.714994398	0.012325386	0.849972995	-0.549550182	3.51E-20	-0.002508313	0.969294857
KLHL2	blue	0.546132188	6.64E-20	-0.546132188	6.64E-20	-0.153281534	0.017968681	-0.489746425	9.24E-16	-0.396842519	2.12E-10	-0.182368226	0.004767547	0.198504511	0.002091422	0.039825377	0.540932208	-0.077020622	0.236524045	0.469775884	1.81E-14	0.717976122	5.28E-39	0.59349617	4.85E-24	-0.107539416	0.097903021	-0.004982255	0.93905449	0.191950267	0.002945469	0.178985505	0.005620918	-0.225407295	0.000457788	0.139153676	0.031880385
SACM1L	blue	0.382310087	1.06E-09	-0.382310087	1.06E-09	-0.272782791	1.98E-05	-0.596133029	2.72E-24	-0.527613047	1.86E-18	-0.342276146	6.06E-08	0.117715079	0.06986787	0.208486943	0.001216131	0.053523689	0.411096626	0.392838017	3.32E-10	0.614730299	3.98E-26	0.512750202	2.33E-17	-0.011257863	0.862833047	0.14269552	0.027729998	0.145170351	0.025112644	0.226484019	0.000429113	-0.007801705	0.90469941	0.026674717	0.682228683
SENP6	blue	0.622054277	6.96E-27	-0.622054277	6.96E-27	-0.259785542	4.98E-05	-0.368544209	4.54E-09	-0.330713968	1.76E-07	-0.124016963	0.056062486	0.405945316	7.41E-11	0.213798278	0.000902051	0.204828854	0.001487755	0.658844893	5.24E-31	0.887736356	1.80E-81	0.699892844	2.38E-36	-0.192154542	0.002914669	0.00431917	0.947152984	0.016847742	0.795971465	0.077083253	0.236141963	-0.435850806	1.87E-12	0.030955528	0.634674177
ARMT1	blue	0.650069081	5.69E-30	-0.650069081	5.69E-30	-0.377196262	1.83E-09	-0.503495691	1.06E-16	-0.602935169	5.99E-25	-0.128147068	0.048302507	0.413394463	3.06E-11	0.163438612	0.011565367	-0.002271316	0.972194793	0.439261522	1.20E-12	0.813810272	1.49E-57	0.708191269	1.53E-37	0.099990816	0.123970527	0.144258665	0.026050996	0.222823397	0.000534	0.128850612	0.047074456	-0.265337689	3.38E-05	0.11366882	0.080111224
FAT4	blue	0.34922544	3.12E-08	-0.34922544	3.12E-08	-0.337016382	9.90E-08	-0.277569572	1.39E-05	-0.504444554	9.08E-17	-0.118903774	0.067070385	0.210013379	0.001116892	0.030410823	0.64064778	0.066651833	0.305844755	0.099239416	0.126835176	0.425523706	6.94E-12	0.367587069	5.01E-09	0.28042816	1.12E-05	0.167016596	0.009845851	0.341796741	6.34E-08	0.002363032	0.971072488	-0.117754541	0.069773496	-0.005667433	0.930692755
TMEM100	blue	0.31815301	5.35E-07	-0.31815301	5.35E-07	-0.212441358	0.000974264	-0.142208469	0.02827174	0.056015737	0.389626618	-0.141782312	0.02875316	0.087948833	0.176283534	0.154646562	0.016959188	0.487275832	1.35E-15	0.554152951	1.47E-20	0.500959657	1.59E-16	0.287750335	6.43E-06	-0.34617619	4.18E-08	-0.107742612	0.097266708	-0.261348452	4.47E-05	0.009369921	0.885662972	-0.321715523	3.93E-07	0.068984061	0.289192651
LOC100129550	blue	0.417937761	1.77E-11	-0.417937761	1.77E-11	-0.146648163	0.02365336	-0.336161879	1.07E-07	-0.204479959	0.001516369	-0.396459476	2.21E-10	-0.039043989	0.548907035	0.117746669	0.069792314	0.149607104	0.020950014	0.477569157	5.81E-15	0.610290255	1.12E-25	0.246222424	0.000124148	-0.206424077	0.001363116	-0.027782924	0.669787389	-0.064234457	0.323758774	0.068570569	0.292099844	-0.423176081	9.29E-12	0.106015656	0.102780619
CCNB1	blue	0.455892343	1.29E-13	-0.455892343	1.29E-13	-0.162465202	0.012076786	-0.281615652	1.03E-05	-0.235539341	0.000246076	-0.186789453	0.003828321	0.134861531	0.037608519	0.063227117	0.331420227	0.082596948	0.204189514	0.327422533	2.37E-07	0.545158477	7.95E-20	0.316675807	6.08E-07	-0.070456493	0.278997934	-0.041935996	0.519682944	0.215154399	0.000834835	0.064350157	0.322886203	-0.30467516	1.67E-06	0.094207957	0.147353723
ZMYM2	blue	0.448051394	3.74E-13	-0.448051394	3.74E-13	-0.174376988	0.007003332	-0.165718013	0.010441823	-0.148744403	0.021709097	-0.100195243	0.123199912	0.277351191	1.41E-05	0.066637922	0.305945937	0.104149138	0.10901487	0.376292329	2.02E-09	0.468974741	2.04E-14	0.362141474	8.72E-09	-0.091456819	0.159591127	-0.105864071	0.103276171	-0.027749881	0.670157066	0.450583843	2.66E-13	-0.293704953	4.04E-06	0.158979788	0.014074984
PPP1CA	blue	-0.316847506	5.99E-07	0.316847506	5.99E-07	0.269331192	2.54E-05	0.504314641	9.28E-17	0.365095612	6.46E-09	0.501667655	1.42E-16	0.03820972	0.557484715	-0.195210884	0.002487432	-0.023116183	0.722747684	-0.454830067	1.49E-13	-0.532472547	7.90E-19	-0.474771678	8.77E-15	0.185849805	0.004012665	-0.055677978	0.39249619	-0.067401374	0.300425512	-0.280835378	1.09E-05	0.002052503	0.974872549	0.013411175	0.836933467
BARD1	blue	0.452584717	2.03E-13	-0.452584717	2.03E-13	-0.39875128	1.70E-10	-0.290390736	5.24E-06	-0.066987446	0.303410334	0.040203732	0.537091502	0.358989524	1.20E-08	0.05645522	0.385911844	0.234635724	0.00026037	0.689607448	6.29E-35	0.699788318	2.46E-36	0.643368691	3.33E-29	-0.402433173	1.11E-10	-0.180457351	0.00523407	-0.129795746	0.045465877	0.076348412	0.240652201	-0.156849508	0.015434209	0.056668363	0.384117995
CENPC	blue	0.580319255	8.02E-23	-0.580319255	8.02E-23	-0.254481608	7.16E-05	-0.386504835	6.71E-10	-0.370750506	3.61E-09	-0.129264647	0.046364024	0.34146529	6.54E-08	0.177354255	0.006079439	0.102299129	0.115483446	0.604489729	4.22E-25	0.849098457	2.36E-67	0.704096077	5.99E-37	-0.128523932	0.047641398	0.008886872	0.8915202	0.022820784	0.726148097	0.143821883	0.026511123	-0.366521994	5.58E-09	0.082306215	0.205792072
CDKN3	blue	0.297323283	3.03E-06	-0.297323283	3.03E-06	-0.099186516	0.127038766	-0.163649033	0.011457358	-0.336591375	1.03E-07	0.049422764	0.447908212	0.445619441	5.18E-13	0.031980917	0.623493215	-0.067275931	0.301328012	0.14794122	0.022437074	0.431860886	3.12E-12	0.435154941	2.04E-12	0.116057187	0.073927756	0.104312783	0.108456672	0.347359829	3.74E-08	-0.14366739	0.026675535	-0.309987496	1.07E-06	-0.055226456	0.396352117
LACTB2	blue	0.630947969	7.88E-28	-0.630947969	7.88E-28	-0.441212979	9.29E-13	-0.554008919	1.51E-20	-0.421611186	1.13E-11	-0.27962006	1.19E-05	0.261688808	4.36E-05	0.10678143	0.100305879	0.152279403	0.018742717	0.590086029	1.01E-23	0.782773186	1.60E-50	0.66678219	5.65E-32	-0.150970565	0.019797181	-0.056143188	0.388547109	0.068701156	0.291179603	0.33954572	7.83E-08	-0.110370629	0.089329559	0.082383957	0.205362664
MSANTD2	blue	0.399650987	1.54E-10	-0.399650987	1.54E-10	-0.31418304	7.52E-07	-0.48549269	1.77E-15	-0.337261852	9.68E-08	-0.299480836	2.55E-06	-0.021400456	0.742571751	0.141103016	0.029535041	0.075608636	0.245253286	0.38078783	1.25E-09	0.5153417	1.51E-17	0.406353947	7.06E-11	-0.088100089	0.175538106	0.094249413	0.147174935	-0.009767109	0.880851484	0.309040028	1.16E-06	0.072549366	0.264930051	-0.002966913	0.963684526
HEATR5A	blue	0.576738873	1.68E-22	-0.576738873	1.68E-22	-0.352834405	2.20E-08	-0.374195664	2.52E-09	-0.459181861	8.15E-14	-0.073310056	0.259939313	0.462252867	5.30E-14	0.068876303	0.289948401	0.063747522	0.327447785	0.497713435	2.66E-16	0.805912209	1.21E-55	0.727563112	1.70E-40	-0.002185857	0.973240567	0.012798117	0.844290612	0.157369091	0.015092515	0.036637543	0.573823368	-0.298096838	2.85E-06	0.090517007	0.163941961
SIRT1	blue	0.511297981	2.96E-17	-0.511297981	2.96E-17	-0.298062704	2.86E-06	-0.552550765	1.99E-20	-0.417394077	1.89E-11	-0.198099603	0.002136797	0.230776726	0.000330567	0.168986587	0.008999187	0.188930242	0.003436566	0.565728518	1.55E-21	0.722866189	9.32E-40	0.667975701	4.02E-32	-0.130698968	0.043971899	0.075455657	0.246212352	-0.004605412	0.943656303	0.185070105	0.004171668	-0.076689239	0.238552864	0.015105786	0.816672368
LUM	blue	0.35318884	2.12E-08	-0.35318884	2.12E-08	-0.435725571	1.90E-12	-0.493053063	5.53E-16	-0.572949898	3.65E-22	-0.292837255	4.33E-06	0.07142629	0.272417584	0.116046897	0.073953539	-0.047447021	0.466286956	0.104393865	0.108180934	0.396117053	2.30E-10	0.380136617	1.34E-09	0.188163599	0.003572485	0.267619863	2.87E-05	0.370691347	3.63E-09	0.279069148	1.24E-05	0.179012539	0.005613587	0.062979877	0.333318293
USP25	blue	0.480604794	3.70E-15	-0.480604794	3.70E-15	-0.2546489	7.08E-05	-0.362290793	8.59E-09	-0.224152658	0.000493437	-0.064821382	0.319348132	0.421451316	1.15E-11	0.271215873	2.22E-05	0.213400938	0.000922669	0.591476563	7.51E-24	0.673920792	7.20E-33	0.577318327	1.49E-22	-0.189941606	0.003264419	0.018655752	0.774635654	-0.0119959	0.853938127	0.040261231	0.536509017	-0.388762333	5.23E-10	0.090204029	0.165410422
PTPN20	blue	0.286258339	7.22E-06	-0.286258339	7.22E-06	-0.221967234	0.000561739	-0.058769753	0.366704954	0.005614953	0.931332948	-0.141563485	0.029003077	0.10921575	0.092751243	0.045441705	0.485358485	0.293159497	4.22E-06	0.36402362	7.21E-09	0.383826033	8.98E-10	0.247649366	0.000113042	-0.133875844	0.039040343	-0.036656763	0.573622269	-0.056183435	0.38820659	0.049744024	0.444958933	-0.236791439	0.000227474	0.232544338	0.000296474
ZNF514	blue	0.317938721	5.45E-07	-0.317938721	5.45E-07	-0.196723326	0.002297812	-0.138763267	0.0323687	-0.060154138	0.355505047	-0.178494065	0.005755679	0.147842606	0.022527892	0.191250308	0.003053256	0.161806975	0.012433802	0.380762011	1.25E-09	0.397496129	1.96E-10	0.277191221	1.43E-05	-0.10310926	0.112614839	-0.041673514	0.522302063	-0.19809002	0.002137882	0.264431315	3.60E-05	-0.269123034	2.58E-05	0.187120451	0.003765228
ZC2HC1A	blue	0.559280137	5.49E-21	-0.559280137	5.49E-21	-0.408426717	5.53E-11	-0.368948478	4.35E-09	-0.176893072	0.006215003	-0.218528386	0.000687129	0.250636061	9.27E-05	0.194577031	0.002571048	0.330202804	1.85E-07	0.72934773	8.81E-41	0.809351302	1.82E-56	0.640497297	7.01E-29	-0.365219612	6.38E-09	-0.110711939	0.088337893	-0.142626106	0.027806658	0.098696843	0.128935323	-0.227576399	0.000401732	0.050700083	0.436247382
XPR1	blue	0.397809155	1.89E-10	-0.397809155	1.89E-10	-0.131427851	0.042796515	-0.178747223	0.005685901	-0.266377548	3.14E-05	-0.277389329	1.41E-05	0.038032616	0.559313946	0.132639881	0.04090048	0.011083335	0.864939055	0.346888406	3.91E-08	0.610261833	1.13E-25	0.293549452	4.09E-06	-0.039061759	0.548725035	0.073304452	0.259975841	0.156210345	0.015863808	0.026570024	0.683408533	-0.464111006	4.08E-14	-0.099400263	0.126217694
GNL2	blue	0.302985342	1.92E-06	-0.302985342	1.92E-06	0.200501072	0.001880259	-0.375853147	2.11E-09	-0.237585128	0.000216371	-0.235193266	0.000251462	0.069871142	0.283021276	0.177705892	0.005977861	0.070070717	0.281645155	0.435772979	1.89E-12	0.51386119	1.94E-17	0.435272998	2.01E-12	-0.168455912	0.009220656	-0.065740833	0.312517545	0.029100044	0.655117194	0.159848106	0.013551802	-0.246807057	0.000119479	0.056796664	0.383040642
LIAS	blue	0.499381784	2.04E-16	-0.499381784	2.04E-16	-0.320870484	4.23E-07	-0.176045318	0.006471271	-0.022207814	0.733221211	0.086900892	0.181512545	0.502407344	1.26E-16	0.168907037	0.009032083	0.388269247	5.52E-10	0.682896853	4.96E-34	0.676005402	3.90E-33	0.593217685	5.15E-24	-0.33121298	1.68E-07	-0.187225849	0.003745336	-0.152580916	0.018506839	0.077023885	0.236504127	-0.396253941	2.26E-10	0.146171451	0.024115896
EIF4E	blue	0.550949668	2.70E-20	-0.550949668	2.70E-20	-0.370077428	3.87E-09	-0.559528398	5.23E-21	-0.170863264	0.008253367	-0.177627838	0.006000276	0.140624683	0.030096451	0.171045278	0.008184041	0.212416153	0.000975654	0.688216636	9.69E-35	0.69149437	3.49E-35	0.654451707	1.75E-30	-0.432208998	2.98E-12	-0.066634469	0.305971054	-0.073123113	0.261159771	0.208943621	0.001185624	0.082416871	0.205181054	0.015931754	0.806840004
RAPGEF4	blue	0.572873627	3.71E-22	-0.572873627	3.71E-22	-0.177150706	0.006138942	-0.323315916	3.41E-07	-0.521383183	5.44E-18	-0.182352877	0.00477114	0.285895947	7.42E-06	0.072683158	0.264047543	0.086138484	0.185388067	0.327183428	2.42E-07	0.705746619	3.46E-37	0.56006901	4.71E-21	0.148379152	0.022037576	0.101530726	0.118256751	0.222627413	0.000540236	-0.014354241	0.825643821	-0.379262472	1.47E-09	0.02686	0.680142505
MINPP1	blue	0.481490086	3.24E-15	-0.481490086	3.24E-15	-0.017039343	0.793702941	-0.430474605	3.72E-12	-0.626481533	2.37E-27	-0.277726714	1.37E-05	0.20559681	0.001426505	0.109207917	0.092774805	0.00605648	0.925948246	0.228050965	0.00039035	0.640975348	6.20E-29	0.443716657	6.68E-13	0.207439233	0.001288861	0.191126522	0.003072685	0.311389418	9.54E-07	0.019358906	0.766382429	-0.42420702	8.18E-12	0.022810947	0.72626143
LOC286052	blue	0.539303357	2.32E-19	-0.539303357	2.32E-19	-0.258946224	5.28E-05	-0.3571947	1.43E-08	-0.138382294	0.032851337	-0.33111184	1.70E-07	0.118921054	0.067030402	0.220153214	0.00062497	0.367998695	4.80E-09	0.712034686	4.14E-38	0.760045983	4.57E-46	0.475866694	7.47E-15	-0.344051636	5.12E-08	-0.122067424	0.060068921	-0.195138269	0.002496885	0.147563789	0.022786384	-0.439377782	1.18E-12	0.07282899	0.26308792
CEP44	blue	0.659713748	4.12E-31	-0.659713748	4.12E-31	-0.344878996	4.73E-08	-0.524135577	3.39E-18	-0.413798475	2.92E-11	-0.278724686	1.28E-05	0.279440138	1.21E-05	0.228333477	0.000383717	0.218403728	0.000692126	0.675353819	4.72E-33	0.903177502	1.21E-88	0.692392477	2.63E-35	-0.189720375	0.003301394	0.012982516	0.842076238	-0.0037201	0.954474342	0.161794385	0.01244072	-0.311225228	9.67E-07	0.148407379	0.022012038
ATG4C	blue	0.535466505	4.64E-19	-0.535466505	4.64E-19	-0.178127727	0.00585801	-0.327971019	2.26E-07	-0.668754638	3.22E-32	-0.32790464	2.27E-07	0.187246815	0.00374139	0.017926523	0.78322173	-0.13412205	0.038678457	0.168631591	0.00914681	0.688642731	8.49E-35	0.37834944	1.62E-09	0.392185177	3.57E-10	0.194675313	0.002557918	0.264663747	3.54E-05	0.020484268	0.753228556	-0.490114639	8.73E-16	0.159365558	0.013840401
RECQL	blue	0.535374715	4.71E-19	-0.535374715	4.71E-19	-0.404311002	8.96E-11	-0.599231132	1.37E-24	-0.416814598	2.03E-11	-0.243357195	0.000149603	0.277030672	1.45E-05	0.244548638	0.000138476	0.087311263	0.179451416	0.488781918	1.07E-15	0.633191536	4.50E-28	0.63596332	2.24E-28	-0.12683014	0.050673125	0.066932333	0.303809224	0.090407999	0.164452308	0.445047833	5.59E-13	0.068836067	0.290230938	0.130374266	0.044504164
WASF3	blue	0.431131239	3.42E-12	-0.431131239	3.42E-12	-0.318863444	5.03E-07	-0.204893848	0.00148248	-0.033400424	0.608156369	-0.168995108	0.00899567	0.19304063	0.002784423	0.207719299	0.001269038	0.446293831	4.74E-13	0.6917328	3.23E-35	0.698304145	3.98E-36	0.468172012	2.29E-14	-0.377335634	1.81E-09	-0.097252263	0.134657793	-0.204035972	0.001553511	0.043619238	0.50304853	-0.430384806	3.76E-12	0.031557317	0.628101946
ETNK1	blue	0.617873002	1.89E-26	-0.617873002	1.89E-26	-0.147249032	0.023081272	-0.407411829	6.23E-11	-0.588850132	1.32E-23	-0.028472793	0.662087514	0.574071076	2.90E-22	0.131392686	0.042852609	-0.077323015	0.234683314	0.337902432	9.12E-08	0.734346033	1.36E-41	0.670746327	1.81E-32	0.189787958	0.003290059	0.128719979	0.047300485	0.242134411	0.000161889	0.012270725	0.850630534	-0.453622491	1.76E-13	0.096199091	0.138951269
LEO1	blue	0.527106573	2.03E-18	-0.527106573	2.03E-18	0.014200336	0.827483871	-0.369113611	4.28E-09	-0.098606662	0.129286976	-0.019523488	0.764454411	0.382531377	1.03E-09	0.203369153	0.001610859	0.278215607	1.33E-05	0.7334969	1.88E-41	0.75543623	3.19E-45	0.689474079	6.56E-35	-0.408986099	5.18E-11	-0.173556708	0.007278979	-0.087578089	0.178120566	0.071710341	0.270510365	-0.398781855	1.70E-10	0.061859407	0.342007358
S100A4	blue	-0.219711202	0.000641344	0.219711202	0.000641344	0.124155484	0.055786436	0.221341651	0.000582844	0.319529216	4.75E-07	0.335402591	1.15E-07	-0.103245143	0.1121392	-0.023538615	0.717894418	0.088689114	0.172657505	-0.233515229	0.00027917	-0.38986171	4.63E-10	-0.346394554	4.10E-08	-0.022307924	0.732064479	0.033813754	0.603722225	-0.119114945	0.066583127	-0.133574813	0.039486692	0.187647271	0.003666744	-0.018559512	0.775767262
FBXL4	blue	0.542126809	1.39E-19	-0.542126809	1.39E-19	-0.175777928	0.006554038	-0.256107731	6.41E-05	-0.40851106	5.48E-11	-0.197327782	0.002225782	0.37935718	1.46E-09	0.103607959	0.110876935	0.136649444	0.035124579	0.500614425	1.68E-16	0.821805513	1.39E-59	0.572485745	4.01E-22	0.019716171	0.762199053	0.001328459	0.983734991	0.058709258	0.367199297	-0.036593222	0.574287217	-0.632189275	5.78E-28	0.077253621	0.235104835
GNA13	blue	0.584474573	3.36E-23	-0.584474573	3.36E-23	-0.170125065	0.008539918	-0.391452079	3.88E-10	-0.422227313	1.04E-11	-0.018567558	0.775672639	0.411286112	3.94E-11	0.167945409	0.009438255	0.076446372	0.240047492	0.514303059	1.80E-17	0.78476614	6.15E-51	0.690149405	5.31E-35	-0.045986041	0.480140467	0.045479774	0.484992561	0.134764638	0.037747271	0.01898867	0.770724831	-0.356558557	1.52E-08	0.02999922	0.645177112
LCORL	blue	0.516940032	1.16E-17	-0.516940032	1.16E-17	-0.230978221	0.000326504	-0.408946505	5.20E-11	-0.436819534	1.65E-12	-0.298882664	2.67E-06	0.163966133	0.01129627	0.04220456	0.51701012	0.081223982	0.211837274	0.462404449	5.19E-14	0.736040617	7.18E-42	0.479422265	4.41E-15	-0.020121637	0.757459636	-0.045702539	0.482854329	0.160560948	0.013135137	0.083688361	0.198254013	-0.310339708	1.04E-06	0.205889747	0.001403757
GIN1	blue	0.644883376	2.24E-29	-0.644883376	2.24E-29	-0.217288396	0.000738353	-0.471103319	1.50E-14	-0.496251942	3.35E-16	-0.212001298	0.000998801	0.417277928	1.92E-11	0.187252969	0.003740233	0.103708856	0.110527891	0.560017072	4.76E-21	0.883058536	1.67E-79	0.687410391	1.24E-34	-0.03278442	0.614791405	0.070076197	0.281607429	0.146157089	0.024129951	-0.02507903	0.700293708	-0.475126193	8.33E-15	0.153401492	0.017877917
SUCO	blue	0.555299272	1.18E-20	-0.555299272	1.18E-20	-0.312133446	8.95E-07	-0.673461354	8.23E-33	-0.389330768	4.91E-10	-0.155417009	0.016411535	0.149816423	0.02076934	0.130476376	0.044336201	0.045088326	0.488762247	0.500198654	1.80E-16	0.601403631	8.45E-25	0.558193798	6.78E-21	-0.14267464	0.027753038	0.029453989	0.651197085	-0.006665459	0.918526935	0.190560447	0.003162972	0.140396588	0.030367354	0.216297448	0.000781799
ZNF654	blue	0.385758524	7.28E-10	-0.385758524	7.28E-10	-0.07586899	0.243627053	-0.169250045	0.008891	-0.068228812	0.294517355	0.074671942	0.251166611	0.445648549	5.16E-13	0.24750324	0.000114135	0.219192697	0.000661055	0.516000418	1.35E-17	0.554635157	1.34E-20	0.457778915	9.91E-14	-0.229008878	0.000368281	-0.072807435	0.263229606	-0.071546307	0.27161063	0.069112966	0.288290316	-0.473039933	1.13E-14	0.059344701	0.362027242
CUL3	blue	0.639449114	9.18E-29	-0.639449114	9.18E-29	-0.306011499	1.49E-06	-0.484121919	2.18E-15	-0.275097368	1.67E-05	-0.018379271	0.777887838	0.429460243	4.23E-12	0.186912242	0.003804805	0.238625694	0.00020258	0.716658709	8.38E-39	0.826326394	8.95E-61	0.777131087	2.29E-49	-0.278302276	1.32E-05	-0.058776896	0.366646612	-0.055984958	0.389887588	0.031958161	0.623740421	-0.257545511	5.81E-05	0.013692869	0.833557642
TRMT11	blue	0.560484072	4.35E-21	-0.560484072	4.35E-21	-0.161602197	0.01254675	-0.395518788	2.46E-10	-0.412665953	3.34E-11	0.012911699	0.842926506	0.584701342	3.20E-23	0.19749897	0.002205759	0.074291529	0.253596141	0.571308531	5.09E-22	0.814218856	1.18E-57	0.804631522	2.42E-55	-0.090006615	0.166341715	0.018196778	0.780036575	0.041664107	0.522396059	-0.012554108	0.847222689	-0.391696054	3.78E-10	0.089800318	0.167319092
EML1	blue	0.445374565	5.36E-13	-0.445374565	5.36E-13	-0.222097366	0.000557439	-0.268504183	2.70E-05	-0.10605556	0.102650483	-0.226258017	0.00043499	0.175581991	0.006615286	0.190440068	0.003182479	0.517969169	9.72E-18	0.655937919	1.16E-30	0.703462913	7.39E-37	0.470463296	1.64E-14	-0.333878791	1.32E-07	-0.075343065	0.246919882	-0.038345115	0.55608823	0.071376907	0.272750087	-0.447674802	3.94E-13	-0.057700946	0.375499593
EPHA7	blue	0.305694955	1.53E-06	-0.305694955	1.53E-06	-0.100094363	0.123579727	-0.093872299	0.148807419	-0.116009932	0.074046227	0.17672503	0.006265067	0.442107255	8.26E-13	0.032030367	0.622956154	-0.04365918	0.502657225	0.34608747	4.22E-08	0.482801813	2.66E-15	0.430451643	3.73E-12	-0.095003793	0.143950191	-0.008451303	0.896806756	-0.079286663	0.222975288	-0.035943286	0.581109401	-0.391994934	3.65E-10	0.021914512	0.736613666
POLI	blue	0.545697583	7.20E-20	-0.545697583	7.20E-20	-0.174836756	0.006852939	-0.272436347	2.03E-05	-0.437580417	1.49E-12	-0.257611115	5.79E-05	0.328301703	2.19E-07	0.20389081	0.001565834	0.082142258	0.206699824	0.502114577	1.32E-16	0.850453129	8.86E-68	0.580508634	7.71E-23	0.013571217	0.835015144	0.092738424	0.153798588	0.11647843	0.072878474	-0.052286312	0.422011409	-0.609112096	1.47E-25	0.074766558	0.250564852
VIM	blue	0.237717219	0.000214573	-0.237717219	0.000214573	-0.07809602	0.230023757	-0.113722575	0.079967597	-0.463495627	4.45E-14	-0.078095853	0.230024758	0.278640591	1.28E-05	0.030037281	0.644757732	-0.060751039	0.350742896	0.051230658	0.431455271	0.383180679	9.64E-10	0.360467137	1.03E-08	0.316730518	6.05E-07	0.199985095	0.001932881	0.304174929	1.74E-06	-0.095354639	0.1424689	-0.357032274	1.45E-08	-0.044787639	0.491668509
DUXAP10	blue	0.246585748	0.000121227	-0.246585748	0.000121227	-0.222767399	0.000535775	-0.091877386	0.157672466	-0.208495692	0.00121554	-0.189579715	0.0033251	0.021271538	0.744068374	-0.017942023	0.783038956	-0.105227943	0.105376356	0.080156488	0.217924043	0.277618858	1.39E-05	0.117739685	0.069809011	0.093445623	0.150670971	0.089705481	0.16776984	0.119300687	0.066156945	0.213631572	0.000910649	-0.145686961	0.024593942	0.121953873	0.060309366
DNAJC9	blue	0.626887298	2.15E-27	-0.626887298	2.15E-27	-0.111909516	0.084927941	-0.438855426	1.27E-12	-0.462760268	4.94E-14	-0.330246821	1.84E-07	0.200005285	0.001930797	0.096023412	0.139677545	0.083584184	0.198815094	0.479347304	4.46E-15	0.788359451	1.07E-51	0.509625451	3.90E-17	0.024556103	0.7062513	-0.042090705	0.518142373	0.116428818	0.073001421	0.126972565	0.050412162	-0.510916836	3.16E-17	0.225743968	0.000448636
ZBTB1	blue	0.277447067	1.40E-05	-0.277447067	1.40E-05	-0.044049286	0.498843924	-0.164121287	0.011218183	-0.202293147	0.001707493	-0.409249178	5.02E-11	-0.180419649	0.005243673	0.094920366	0.144304146	0.011428975	0.860769203	0.195194051	0.002489621	0.353264819	2.11E-08	0.100187649	0.123228473	-0.038858779	0.550805707	0.032602528	0.616756611	0.066606586	0.306173947	0.589916334	1.05E-23	-0.22489147	0.000472145	0.120732324	0.062946487
APOE	blue	-0.464237139	4.01E-14	0.464237139	4.01E-14	0.423947982	8.44E-12	0.597308631	2.10E-24	0.268526676	2.69E-05	0.231913004	0.000308257	-0.113279321	0.08115815	-0.037643305	0.56334512	-0.128407783	0.047844341	-0.525712197	2.58E-18	-0.511388125	2.92E-17	-0.490422145	8.32E-16	0.220829049	0.000600681	0.327043561	2.45E-07	0.111467404	0.086174271	-0.203112535	0.00163344	-0.142703056	0.027721686	-0.146866057	0.023444506
SGO2	blue	0.380908882	1.23E-09	-0.380908882	1.23E-09	-0.092113656	0.156602227	-0.27772208	1.38E-05	-0.102698108	0.114063641	-0.328622922	2.13E-07	0.014377091	0.825370713	0.147776129	0.022589292	0.109811856	0.090972267	0.481171707	3.40E-15	0.571704956	4.69E-22	0.34381848	5.24E-08	-0.29045116	5.22E-06	-0.087984786	0.176106137	0.037732717	0.562418059	0.447576039	3.99E-13	-0.239887992	0.000186951	0.185237278	0.004137106
FIGNL1	blue	0.536179899	4.08E-19	-0.536179899	4.08E-19	-0.152106145	0.018879437	-0.234577228	0.000261322	-0.026012943	0.689699502	0.135092479	0.037279536	0.575421102	2.20E-22	0.265810395	3.27E-05	0.440922786	9.65E-13	0.765230849	4.88E-47	0.764853811	5.75E-47	0.708078831	1.59E-37	-0.421240285	1.18E-11	-0.150737156	0.019990538	-0.134620567	0.037954383	-0.052886624	0.416695178	-0.462768002	4.93E-14	0.048179155	0.459428433
RHOT1	blue	0.569658647	7.09E-22	-0.569658647	7.09E-22	-0.374048745	2.56E-09	-0.58448014	3.35E-23	-0.24741256	0.000114818	-0.27740182	1.41E-05	0.188283293	0.003550949	0.325314325	2.86E-07	0.221880841	0.000564611	0.77876033	1.07E-49	0.832005021	2.54E-62	0.690499592	4.76E-35	-0.413081124	3.18E-11	0.022747453	0.726993065	-0.105316451	0.105082145	0.215754557	0.000806589	-0.132184256	0.041604769	0.0687537	0.290809881
LOC100287896	blue	0.49978195	1.92E-16	-0.49978195	1.92E-16	-0.253299608	7.76E-05	-0.222800729	0.000534718	-0.193431645	0.002728646	-0.315968132	6.46E-07	0.169126359	0.008941646	0.20696704	0.001322926	0.209028963	0.001180001	0.581215822	6.65E-23	0.750652601	2.28E-44	0.442079367	8.29E-13	-0.19952715	0.001980705	-0.006893243	0.915752816	-0.140158004	0.030652941	0.108576348	0.094690165	-0.506840485	6.16E-17	0.158049857	0.014654852
MBIP	blue	0.505423002	7.75E-17	-0.505423002	7.75E-17	-0.614389371	4.31E-26	-0.513938708	1.91E-17	-0.269856091	2.45E-05	-0.04600718	0.479938441	0.240369891	0.000181287	0.153354412	0.017913492	0.207693655	0.001270842	0.524970559	2.94E-18	0.572269176	4.19E-22	0.585917956	2.47E-23	-0.245801262	0.000127617	-0.01404771	0.829309559	-0.008579283	0.895252962	0.236526886	0.000231292	0.242683162	0.000156263	0.093257438	0.151498482
CNTN1	blue	0.311638102	9.34E-07	-0.311638102	9.34E-07	-0.07027925	0.280212093	-0.108272135	0.095623922	-0.100517529	0.121992571	-0.034537337	0.595994696	0.306683304	1.41E-06	0.115967899	0.074151735	0.284184514	8.46E-06	0.44651385	4.60E-13	0.537724704	3.09E-19	0.400984737	1.32E-10	-0.208069641	0.001244635	-0.107397231	0.098350241	0.046831775	0.472093895	0.043757129	0.50169833	-0.450833185	2.57E-13	-0.051978188	0.42475537
PPIL4	blue	0.605438886	3.40E-25	-0.605438886	3.40E-25	-0.312485346	8.69E-07	-0.304167217	1.74E-06	-0.346711868	3.98E-08	-0.081691335	0.209211243	0.378417622	1.61E-09	0.126201202	0.051839007	0.130199088	0.044793557	0.53912641	2.40E-19	0.794794126	4.23E-53	0.695030665	1.14E-35	-0.086469047	0.183700325	0.045658194	0.483279572	0.0854028	0.189185062	0.08242629	0.205129106	-0.332811381	1.46E-07	0.06371532	0.327692704
LINC00909	blue	0.428896568	4.54E-12	-0.428896568	4.54E-12	-0.111609954	0.085770826	-0.283132003	9.16E-06	-0.473518604	1.05E-14	-0.383203655	9.61E-10	0.069891376	0.282881554	0.184763381	0.004235759	-0.012892801	0.843153439	0.268769109	2.64E-05	0.628220253	1.55E-27	0.291219189	4.91E-06	0.197606259	0.002193294	0.198450979	0.00209737	0.095430075	0.142151927	-0.009767397	0.880848001	-0.509444612	4.02E-17	0.127826343	0.04887115
CSGALNACT2	blue	0.436673821	1.68E-12	-0.436673821	1.68E-12	0.022316317	0.731967527	-0.446151784	4.83E-13	-0.721397326	1.58E-39	-0.228107258	0.00038902	0.299860013	2.47E-06	0.161275644	0.012728732	-0.100489607	0.122096805	0.144527052	0.025771681	0.584365494	3.43E-23	0.510642735	3.30E-17	0.329010305	2.05E-07	0.265603638	3.31E-05	0.389293132	4.93E-10	0.001336445	0.983637229	-0.354518684	1.86E-08	-0.023108392	0.722837295
ISL1	blue	0.294134029	3.91E-06	-0.294134029	3.91E-06	-0.231228956	0.000321514	-0.314961911	7.04E-07	-0.10112248	0.11975115	-0.205548914	0.001430257	-0.024542145	0.706410563	0.043702697	0.502231086	0.101991879	0.116586205	0.323820834	3.26E-07	0.340537425	7.13E-08	0.201791012	0.001754377	-0.158693808	0.01425113	-0.104629621	0.107382322	-0.180339394	0.005264168	0.163109332	0.011736189	-0.0059674	0.927034371	0.154219522	0.017269549
GCH1	blue	0.475468792	7.92E-15	-0.475468792	7.92E-15	-0.115712309	0.074795926	-0.307558108	1.31E-06	-0.242338157	0.000159778	-0.09229789	0.155771508	0.279311407	1.22E-05	0.298709062	2.71E-06	0.036103623	0.579422893	0.508122196	5.00E-17	0.666033929	7.00E-32	0.592475319	6.05E-24	-0.209412815	0.001155014	0.124928622	0.054266289	0.137756235	0.033657757	0.048169636	0.459517244	-0.37351393	2.70E-09	-0.053381901	0.412338809
RASGRP1	blue	0.226672887	0.000424259	-0.226672887	0.000424259	0.136904806	0.034781424	-0.369610101	4.06E-09	-0.307700029	1.30E-06	-0.268665186	2.66E-05	0.079299022	0.22290294	0.269146817	2.57E-05	-0.151407601	0.019439498	0.223135179	0.000524218	0.372701558	2.94E-09	0.394100709	2.88E-10	-0.023850101	0.714323014	0.307807879	1.29E-06	0.205763832	0.001413494	0.256003761	6.46E-05	-0.084990978	0.191335259	-0.074153349	0.254482653
RACGAP1	blue	0.472208637	1.28E-14	-0.472208637	1.28E-14	-0.472356874	1.25E-14	-0.539099266	2.41E-19	-0.130341851	0.044557594	-0.312888073	8.40E-07	-0.047007579	0.470430553	0.145259283	0.025022687	0.245056638	0.000133972	0.549910827	3.28E-20	0.534449483	5.56E-19	0.346560796	4.03E-08	-0.385357596	7.60E-10	-0.128262818	0.048098644	-0.043786558	0.501410419	0.333245429	1.40E-07	0.133635555	0.039396282	0.142003871	0.028502002
RRM2B	blue	0.490738256	7.93E-16	-0.490738256	7.93E-16	-0.346717073	3.97E-08	-0.595689548	3.00E-24	-0.305094157	1.61E-06	-0.129156027	0.04654953	0.168990071	0.008997749	0.230556523	0.000335061	0.14406064	0.026258749	0.556168778	1.00E-20	0.621685851	7.61E-27	0.631307727	7.21E-28	-0.28831928	6.16E-06	0.0235424	0.71785098	0.10374511	0.110402687	0.190583537	0.003159243	0.175574022	0.006617788	0.004360973	0.946642269
TGFBR1	blue	0.332032573	1.56E-07	-0.332032573	1.56E-07	-0.055709139	0.392230914	-0.288041935	6.29E-06	-0.186067836	0.003969192	-0.091193402	0.160801763	0.094351241	0.146736473	0.171935284	0.007852455	0.110739947	0.088256911	0.2986637	2.72E-06	0.36238349	8.51E-09	0.279416965	1.21E-05	-0.092042882	0.15692224	0.049643045	0.445884767	0.205332768	0.001447299	0.185075833	0.004170479	-0.252316738	8.29E-05	0.06088394	0.349688089
MRPL19	blue	0.429655633	4.13E-12	-0.429655633	4.13E-12	-0.113862197	0.079595518	-0.287831745	6.39E-06	-0.327002812	2.46E-07	-0.216803798	0.000759313	0.233394815	0.000281264	0.289328804	5.69E-06	0.145684912	0.02459598	0.418425255	1.67E-11	0.611464817	8.52E-26	0.42956999	4.17E-12	-0.032223678	0.620858566	0.165550795	0.010520839	0.0889668	0.171311739	0.140310018	0.030470716	-0.407032092	6.52E-11	0.028170341	0.665458981
CMTR2	blue	0.555046296	1.24E-20	-0.555046296	1.24E-20	-0.590857696	8.59E-24	-0.618547867	1.61E-26	-0.305938216	1.50E-06	-0.196289742	0.00235078	0.162348938	0.012139183	0.161736387	0.012472634	0.193600279	0.002704906	0.593048719	5.34E-24	0.675363339	4.71E-33	0.612972035	6.00E-26	-0.280664049	1.10E-05	-0.012538415	0.847411338	-0.019502158	0.76470421	0.235792449	0.000242205	0.197824444	0.002168142	0.092358335	0.155499681
SLC25A32	blue	0.365762378	6.04E-09	-0.365762378	6.04E-09	-0.057175241	0.379872439	-0.234390823	0.000264376	-0.588746391	1.35E-23	0.039539282	0.543845395	0.474724279	8.83E-15	0.040771494	0.531353792	-0.18068993	0.005175177	0.100749179	0.121130459	0.518400188	9.04E-18	0.495211139	3.95E-16	0.342301232	6.04E-08	0.168492053	0.009205422	0.334534887	1.24E-07	-0.128648651	0.047424283	-0.405439893	7.86E-11	-0.007182397	0.912232783
KATNBL1	blue	0.421427779	1.15E-11	-0.421427779	1.15E-11	-0.202300641	0.001706802	-0.227587391	0.000401465	-0.066849092	0.304412351	-0.27399735	1.81E-05	0.039948511	0.539680768	0.052236791	0.422451716	0.177706466	0.005977696	0.478441024	5.10E-15	0.483483944	2.40E-15	0.300704653	2.31E-06	-0.230379662	0.000338711	-0.174482589	0.006968531	-0.061707661	0.343195097	0.464666266	3.77E-14	-0.260049589	4.89E-05	0.207988587	0.001250243
ZNF468	blue	0.599215105	1.38E-24	-0.599215105	1.38E-24	-0.519683878	7.27E-18	-0.595110781	3.41E-24	-0.4382819	1.36E-12	-0.249391364	0.000100745	0.119399788	0.065930474	0.150122819	0.020507306	0.041348347	0.525556	0.487311984	1.34E-15	0.71376947	2.28E-38	0.562963004	2.68E-21	-0.146710101	0.023593829	0.112238959	0.084008681	0.120249695	0.064014176	0.193034551	0.002785299	0.04922663	0.4497142	0.042419958	0.514871539
PTAR1	blue	0.467355036	2.57E-14	-0.467355036	2.57E-14	-0.019381867	0.766113357	-0.179781295	0.005408689	-0.097872697	0.132176589	0.218207599	0.000700056	0.622213311	6.70E-27	0.196930357	0.002272906	0.21528311	0.000828702	0.519943688	6.96E-18	0.604766175	3.96E-25	0.525812269	2.54E-18	-0.244389133	0.00013992	-0.031255945	0.631389654	0.009594553	0.882941281	-0.036859552	0.571502555	-0.505725202	7.38E-17	0.026126327	0.688417344
VEZT	blue	0.627086499	2.05E-27	-0.627086499	2.05E-27	-0.339926375	7.55E-08	-0.42592615	6.60E-12	-0.371935858	3.19E-09	-0.162999626	0.011793593	0.371837598	3.22E-09	0.165282492	0.010648725	0.166772171	0.009955671	0.689676804	6.16E-35	0.912551104	1.29E-93	0.772803434	1.67E-48	-0.218223249	0.00069942	-0.065585207	0.313666912	0.069978399	0.282281148	0.119463573	0.065785044	-0.347274698	3.77E-08	0.036072887	0.57974601
RPAP3	blue	0.604243091	4.46E-25	-0.604243091	4.46E-25	-0.195109682	0.002500615	-0.285645853	7.56E-06	-0.343473767	5.41E-08	0.08089404	0.213705399	0.666442458	6.23E-32	0.126579844	0.051134465	0.077717574	0.232296739	0.556013067	1.03E-20	0.802667468	6.93E-55	0.764906829	5.62E-47	-0.066751585	0.305119845	-0.040378327	0.535323781	0.085177926	0.190356966	0.058594625	0.368137176	-0.484066878	2.20E-15	0.140173078	0.030634828
PLOD2	blue	0.452257235	2.12E-13	-0.452257235	2.12E-13	-0.176441652	0.00635031	-0.29164954	4.75E-06	-0.375464872	2.20E-09	-0.144496664	0.025803177	0.230064903	0.000345299	0.06434761	0.32290539	-0.105633923	0.104032155	0.262791441	4.04E-05	0.551131148	2.61E-20	0.479456725	4.39E-15	0.020294806	0.755438239	0.076423397	0.240189223	0.313064009	8.28E-07	0.263370494	3.88E-05	-0.198232735	0.00212178	0.071181648	0.274067506
FAM122B	blue	0.521297694	5.52E-18	-0.521297694	5.52E-18	-0.406578532	6.88E-11	-0.6281727	1.57E-27	-0.43929963	1.19E-12	-0.257653787	5.77E-05	0.162902019	0.011844874	0.129248873	0.046390925	0.032061854	0.622614283	0.548631282	4.17E-20	0.720844878	1.92E-39	0.68064546	9.78E-34	-0.183038292	0.004613033	0.046670738	0.473620336	0.055202137	0.396560434	0.210240855	0.001102757	0.06036733	0.353799538	0.053794058	0.408734084
SPAST	blue	0.658705291	5.45E-31	-0.658705291	5.45E-31	-0.357625382	1.37E-08	-0.351861022	2.42E-08	-0.275910155	1.57E-05	0.036087784	0.579589394	0.542316035	1.34E-19	0.203870099	0.001567599	0.197258112	0.002233978	0.674335672	6.37E-33	0.857178801	5.91E-70	0.727058324	2.04E-40	-0.210361342	0.001095337	-0.055980129	0.389928544	0.038882112	0.550566331	0.130302455	0.044622605	-0.430976605	3.49E-12	0.105838055	0.10336141
SLC27A2	blue	0.3057884	1.52E-06	-0.3057884	1.52E-06	-0.167162566	0.00978078	-0.321586258	3.97E-07	-0.130067115	0.045012617	-0.151574074	0.019304734	0.07253029	0.265056038	0.226653324	0.000424759	-0.110881648	0.087848102	0.385526557	7.46E-10	0.459768391	7.51E-14	0.465086971	3.55E-14	-0.300707237	2.31E-06	0.101858039	0.117069139	0.054258725	0.404692547	0.122319636	0.059537686	-0.051329047	0.430569979	-0.110290662	0.089563182
OSTM1	blue	0.413796662	2.92E-11	-0.413796662	2.92E-11	-0.084256687	0.195213359	-0.205028031	0.001471642	-0.543787477	1.02E-19	-0.204879263	0.001483662	0.327392457	2.38E-07	-0.008782041	0.892792118	-0.179162636	0.005573043	0.204978102	0.001475666	0.622940201	5.62E-27	0.467026546	2.69E-14	0.301343577	2.19E-06	0.136316648	0.035576095	0.27737616	1.41E-05	0.035561291	0.58513658	-0.495645501	3.69E-16	0.053665224	0.409858859
REV1	blue	0.550346471	3.02E-20	-0.550346471	3.02E-20	-0.117973677	0.069251318	-0.349579293	3.02E-08	-0.081635462	0.209523954	-0.124585832	0.054935992	0.299465961	2.55E-06	0.222672236	0.000538804	0.284417205	8.31E-06	0.779022577	9.48E-50	0.801212333	1.50E-54	0.677942541	2.20E-33	-0.440661737	9.99E-13	-0.154472585	0.017085038	-0.186522806	0.00387984	0.064845838	0.319165202	-0.41014454	4.51E-11	0.095518206	0.141782297
CEP78	blue	0.520459002	6.37E-18	-0.520459002	6.37E-18	-0.133126367	0.040159594	-0.232588014	0.000295675	-0.200956655	0.001834888	-0.279738408	1.18E-05	0.195992813	0.002387692	0.193703588	0.002690454	0.180623991	0.005191813	0.579309182	9.89E-23	0.785257086	4.85E-51	0.454715384	1.51E-13	-0.198982792	0.002038957	-0.010831372	0.867981145	-0.014926542	0.818809941	0.027449253	0.673524074	-0.623066479	5.45E-27	0.076260064	0.241198489
AP3D1	blue	-0.440552615	1.01E-12	0.440552615	1.01E-12	0.105920311	0.103092094	0.332870349	1.45E-07	0.386125475	6.99E-10	0.180982034	0.005102055	-0.265300611	3.39E-05	-0.219927964	0.000633265	-0.135196309	0.037132428	-0.360944269	9.84E-09	-0.601155297	8.93E-25	-0.515332263	1.51E-17	-0.033476678	0.607337245	-0.233161215	0.000285368	-0.135518206	0.036679471	0.343278697	5.51E-08	0.360666802	1.01E-08	0.092751275	0.153741318
KIAA0895	blue	0.449545262	3.06E-13	-0.449545262	3.06E-13	-0.196748503	0.00229477	-0.32387356	3.25E-07	-0.13878646	0.032339514	-0.174729935	0.006887621	0.167533754	0.009617021	0.115510817	0.075306965	0.145965062	0.024318552	0.559641739	5.12E-21	0.659816239	4.00E-31	0.554557776	1.36E-20	-0.354370169	1.89E-08	-0.049051061	0.451334304	0.084375911	0.194579821	0.106986709	0.099650567	-0.271827745	2.12E-05	-0.162477597	0.012070151
CKAP4	blue	-0.280112944	1.15E-05	0.280112944	1.15E-05	0.100948186	0.12039362	0.26044111	4.76E-05	0.269602053	2.49E-05	-0.090848753	0.162396124	-0.315016736	7.01E-07	-0.080394764	0.216554695	-0.062433823	0.337535025	-0.278115048	1.34E-05	-0.453189117	1.87E-13	-0.359745077	1.11E-08	0.022025934	0.735324307	-0.084567822	0.193563189	-0.103359055	0.111741684	0.465581554	3.31E-14	0.249118702	0.000102583	0.012565751	0.847082739
BBS10	blue	0.587119706	1.91E-23	-0.587119706	1.91E-23	-0.222111359	0.000556978	-0.374963833	2.32E-09	-0.307761826	1.29E-06	-0.244235243	0.000141326	0.244751925	0.000136657	0.182052154	0.004842034	0.148249161	0.022155512	0.632035328	6.01E-28	0.868409903	7.55E-74	0.625685488	2.88E-27	-0.207218989	0.001304649	0.002628663	0.967822379	0.025242189	0.698438603	0.10963878	0.091485951	-0.440648543	1.00E-12	0.01899127	0.770694316
JMY	blue	0.503352736	1.08E-16	-0.503352736	1.08E-16	-0.23255647	0.000296252	-0.25957104	5.05E-05	-0.390455043	4.34E-10	-0.339331737	7.98E-08	0.165431813	0.010577383	0.027942021	0.668008545	0.379195624	1.48E-09	0.383045986	9.78E-10	0.63116447	7.47E-28	0.324799497	2.99E-07	0.163713938	0.011424222	-0.068547319	0.292263882	-0.00911385	0.88876722	0.115332341	0.075761989	-0.442198127	8.16E-13	0.253156451	7.83E-05
RASSF3	blue	0.354146165	1.93E-08	-0.354146165	1.93E-08	-0.192208294	0.002906614	-0.438677392	1.30E-12	-0.452464266	2.06E-13	-0.417855358	1.79E-11	0.076502937	0.239698804	0.141374024	0.029220954	-0.077522142	0.233476704	0.246290933	0.000123592	0.465237063	3.48E-14	0.400411847	1.41E-10	0.041992216	0.519122835	0.21585189	0.000802091	0.302043563	2.07E-06	0.445730877	5.11E-13	-0.113884113	0.079537239	-0.064313754	0.323160572
LIPT1	blue	0.461332437	6.04E-14	-0.461332437	6.04E-14	-0.04487014	0.490870184	-0.354293127	1.91E-08	-0.484362658	2.10E-15	-0.397712152	1.92E-10	0.157059985	0.015294986	0.216218238	0.000785371	0.028096397	0.666284272	0.357340611	1.41E-08	0.671369699	1.51E-32	0.405632746	7.68E-11	0.126934209	0.050482331	0.21490044	0.00084706	0.106690123	0.100598451	0.022869501	0.725586928	-0.519481589	7.52E-18	0.120371136	0.06374413
ARMCX1	blue	0.433879909	2.41E-12	-0.433879909	2.41E-12	-0.185332842	0.004117465	-0.308718818	1.19E-06	-0.046728071	0.473076576	-0.106885535	0.099973117	0.190325046	0.00320122	0.239188385	0.000195468	0.380488655	1.29E-09	0.701868462	1.25E-36	0.691330754	3.67E-35	0.507884978	5.19E-17	-0.440671947	9.98E-13	-0.137324978	0.034222989	-0.215502385	0.000818348	0.149892347	0.02070414	-0.365684596	6.08E-09	0.043109648	0.508054798
EED	blue	0.522545578	4.46E-18	-0.522545578	4.46E-18	-0.057825859	0.374465125	-0.260858688	4.62E-05	-0.275533287	1.62E-05	-0.141587118	0.028975997	0.329510893	1.96E-07	0.175116444	0.006762869	0.170275989	0.008480624	0.566143377	1.43E-21	0.80272255	6.73E-55	0.571407173	4.99E-22	-0.169064439	0.008967097	-0.042296941	0.516092351	0.029750735	0.647917838	-0.01523645	0.815114981	-0.629406312	1.16E-27	0.013212192	0.83931989
ACSL3	blue	0.473971456	9.86E-15	-0.473971456	9.86E-15	-0.124779612	0.054556572	-0.411475426	3.85E-11	-0.174464273	0.006974556	-0.208032203	0.001247222	0.24270517	0.000156041	0.229456565	0.00035837	0.161240389	0.012748517	0.671364033	1.52E-32	0.708123943	1.56E-37	0.573853291	3.04E-22	-0.331063691	1.71E-07	-0.03625104	0.577874299	-0.058787654	0.366558749	0.245554965	0.000129687	-0.357043971	1.45E-08	0.037500648	0.564825752
STOX2	blue	0.432371343	2.92E-12	-0.432371343	2.92E-12	-0.274123928	1.79E-05	-0.229913662	0.000348506	0.015397691	0.813194152	-0.084821597	0.192224797	0.230127169	0.000343986	0.180816178	0.005143459	0.306645997	1.42E-06	0.671275518	1.56E-32	0.617540545	2.05E-26	0.438413547	1.34E-12	-0.392686056	3.38E-10	-0.166580708	0.010042452	-0.204896501	0.001482265	0.100501173	0.122053619	-0.396031275	2.32E-10	0.135792822	0.036296752
TRIQK	blue	0.581932405	5.73E-23	-0.581932405	5.73E-23	-0.404220202	9.06E-11	-0.36639124	5.66E-09	-0.211106559	0.001050454	-0.0149511	0.818516998	0.490353443	8.41E-16	0.21948853	0.000649741	0.2337056	0.000275889	0.736576092	5.85E-42	0.843658112	1.09E-65	0.780000579	5.99E-50	-0.386049638	7.05E-10	-0.051483062	0.429186265	0.035945426	0.581086872	0.138410056	0.032815961	-0.31854677	5.17E-07	-0.026300546	0.686448988
ZWILCH	blue	0.522890842	4.20E-18	-0.522890842	4.20E-18	-0.176833594	0.006232682	-0.417523197	1.86E-11	-0.203572623	0.001593158	-0.14256083	0.027878915	0.439839563	1.11E-12	0.251756428	8.60E-05	0.210166989	0.001107329	0.698122068	4.22E-36	0.766159914	3.25E-47	0.713793429	2.26E-38	-0.34036559	7.25E-08	-0.112374225	0.083633567	0.044379319	0.495629799	0.282836858	9.37E-06	-0.335383913	1.15E-07	0.065279092	0.315935769
AURKA	blue	0.391039438	4.06E-10	-0.391039438	4.06E-10	0.081340004	0.211183153	-0.193881073	0.002665791	-0.247817764	0.000111794	-0.245011004	0.000134371	0.094317793	0.146880389	0.071382432	0.272712872	0.050165584	0.441105616	0.257621927	5.78E-05	0.525741129	2.57E-18	0.245389154	0.000131098	0.00280542	0.965659973	0.013586524	0.834831727	0.168494752	0.009204284	-0.064042177	0.32521226	-0.48495586	1.92E-15	0.205935119	0.001400263
ZNF765	blue	0.546340596	6.39E-20	-0.546340596	6.39E-20	-0.446243194	4.77E-13	-0.235079297	0.000253259	-0.254007275	7.40E-05	-0.111868515	0.085042912	0.307614421	1.31E-06	0.082615214	0.20408913	0.182009728	0.004852112	0.5098136	3.79E-17	0.713262699	2.72E-38	0.51305623	2.21E-17	-0.097849696	0.132267942	-0.068006625	0.296096181	-0.047757165	0.463374698	0.131645679	0.042450414	-0.313772053	7.79E-07	0.078987419	0.224732158
ANGEL2	blue	0.603368254	5.43E-25	-0.603368254	5.43E-25	-0.277716917	1.38E-05	-0.411370295	3.90E-11	-0.363493966	7.60E-09	0.072093607	0.267951424	0.582538979	5.04E-23	0.245857177	0.000127151	0.139856089	0.031017616	0.560045004	4.73E-21	0.756000114	2.52E-45	0.715798676	1.13E-38	-0.114656974	0.077504059	0.039654058	0.542675751	0.101795873	0.117293981	-0.007832713	0.90432245	-0.371305783	3.41E-09	0.094868153	0.144526009
PUS7	blue	0.472205473	1.28E-14	-0.472205473	1.28E-14	-0.231892412	0.000308648	-0.375211467	2.26E-09	-0.082612399	0.204104599	-0.074677934	0.251128471	0.276003608	1.56E-05	0.171649497	0.007957602	0.315057979	6.98E-07	0.749265451	4.01E-44	0.734924529	1.10E-41	0.66139394	2.58E-31	-0.448941132	3.32E-13	-0.246070534	0.000125389	-0.128358516	0.047930641	0.097262708	0.134615727	-0.232780318	0.000292179	-0.001095359	0.986588654
KIF20A	blue	0.308372811	1.23E-06	-0.308372811	1.23E-06	-0.166540758	0.010060643	-0.188308138	0.003546494	-0.118877273	0.067131738	-0.0323797	0.61916783	0.24992353	9.72E-05	0.043122194	0.507931235	0.118072071	0.069017896	0.31615924	6.35E-07	0.419764466	1.41E-11	0.347057828	3.85E-08	-0.138333197	0.032913979	-0.085835755	0.186943668	0.108104151	0.096142664	0.052275388	0.422108517	-0.179647858	0.005443766	0.058245917	0.370999262
ATR	blue	0.526534604	2.24E-18	-0.526534604	2.24E-18	0.02559607	0.694421152	-0.312180539	8.92E-07	-0.411033849	4.06E-11	-0.073624549	0.257895003	0.477201785	6.13E-15	0.181389281	0.005001658	0.049551827	0.446722042	0.494921573	4.13E-16	0.783655208	1.05E-50	0.67564026	4.34E-33	-0.021044558	0.746705746	-0.021029674	0.7468788	0.139307601	0.03168959	-0.109803815	0.090996081	-0.593653772	4.68E-24	0.074387807	0.252979725
SETBP1	blue	0.421186538	1.19E-11	-0.421186538	1.19E-11	-0.141209194	0.029411643	-0.293263279	4.18E-06	-0.211024578	0.001055307	-0.280239779	1.14E-05	0.081706671	0.209125473	0.181609192	0.004948186	0.338497321	8.63E-08	0.521143777	5.67E-18	0.617479187	2.08E-26	0.309168717	1.15E-06	-0.140165166	0.030644334	0.013702426	0.833443164	-0.136168911	0.035778107	0.104024273	0.109442303	-0.476244844	7.06E-15	0.081282851	0.211505193
RPS27A	blue	0.420465262	1.30E-11	-0.420465262	1.30E-11	-0.308112465	1.26E-06	-0.515425945	1.49E-17	-0.459720513	7.56E-14	-0.339258219	8.04E-08	0.118595878	0.067786046	0.09696165	0.135832225	0.066763565	0.305032865	0.358584795	1.25E-08	0.57158801	4.81E-22	0.429765919	4.07E-12	0.017819862	0.784479814	0.098283946	0.130551444	0.156846951	0.015435907	0.20695395	0.001323882	-0.120207194	0.064108905	0.038299193	0.55656169
SPRTN	blue	0.44455038	5.98E-13	-0.44455038	5.98E-13	-0.141112463	0.029524044	-0.051253753	0.431247372	0.019379188	0.766144756	0.2069887	0.001321346	0.522388082	4.58E-18	0.1188878	0.067107361	0.285264475	7.79E-06	0.647239356	1.21E-29	0.705335499	3.97E-37	0.608996939	1.51E-25	-0.344453404	4.93E-08	-0.149889902	0.020706237	-0.137357412	0.0341802	-0.089916134	0.166769864	-0.488249156	1.16E-15	-0.007484676	0.90855479
PDIK1L	blue	0.618210987	1.75E-26	-0.618210987	1.75E-26	-0.383488515	9.32E-10	-0.496803784	3.08E-16	-0.458536736	8.92E-14	-0.218515505	0.000687643	0.327300977	2.39E-07	0.162548431	0.012032293	0.169487866	0.008794334	0.525019265	2.91E-18	0.755911383	2.61E-45	0.55592502	1.05E-20	0.031177351	0.632248245	-0.006117216	0.925207784	-0.080677343	0.214938739	0.206339793	0.001369454	-0.234896736	0.000256164	0.288029453	6.30E-06
CETN3	blue	0.644122596	2.74E-29	-0.644122596	2.74E-29	-0.275302892	1.64E-05	-0.454341118	1.59E-13	-0.385825647	7.22E-10	-0.163066718	0.011758458	0.321208717	4.10E-07	0.107361396	0.098463209	0.146509387	0.023787213	0.565127231	1.75E-21	0.789558426	5.89E-52	0.645606539	1.85E-29	-0.105498782	0.104478098	-0.0394675	0.544577547	0.011908135	0.854994939	0.129296601	0.046309571	-0.311422381	9.51E-07	0.195971799	0.002390325
TTC39B	blue	0.593178342	5.19E-24	-0.593178342	5.19E-24	-0.17253544	0.007635661	-0.36029219	1.05E-08	-0.042819689	0.51091495	-0.093236047	0.151592765	0.288007079	6.31E-06	0.170549497	0.008374102	0.452639883	2.01E-13	0.741708854	8.08E-43	0.752778059	9.57E-45	0.561315263	3.70E-21	-0.410491108	4.33E-11	-0.161389004	0.012665297	-0.09028273	0.165040246	0.112759513	0.082572485	-0.370479056	3.71E-09	0.110013127	0.090377802
ABCC5	blue	0.328995861	2.06E-07	-0.328995861	2.06E-07	-0.333630828	1.35E-07	-0.307314515	1.34E-06	-0.055329681	0.395468591	0.094836133	0.144662193	0.258277779	5.53E-05	0.157904784	0.014747176	0.125614257	0.052947076	0.458271544	9.26E-14	0.426529762	6.12E-12	0.421847397	1.10E-11	-0.33815748	8.91E-08	-0.091243131	0.160572686	-0.167339707	0.009702324	-0.053172376	0.414178466	-0.023908429	0.71365493	-0.041890727	0.52013417
TPR	blue	0.465038938	3.58E-14	-0.465038938	3.58E-14	-0.142313079	0.028154626	-0.201229938	0.001808154	-0.090428764	0.164354999	-0.04827592	0.458526175	0.434838786	2.13E-12	0.122214381	0.059758912	0.265088096	3.44E-05	0.592323755	6.25E-24	0.625925115	2.72E-27	0.574947294	2.43E-22	-0.290282667	5.29E-06	-0.160351226	0.013256538	-0.093345783	0.151109573	0.399691733	1.53E-10	-0.381030508	1.22E-09	0.135094499	0.037276669
VPS41	blue	0.496909685	3.02E-16	-0.496909685	3.02E-16	-0.411819288	3.70E-11	-0.213996521	0.000891924	-0.037680543	0.562958926	-0.19675791	0.002293634	0.140176274	0.03063099	0.141828798	0.028700307	0.368408473	4.60E-09	0.683544383	4.07E-34	0.715324803	1.33E-38	0.519750816	7.19E-18	-0.399530604	1.56E-10	-0.103121568	0.11257169	-0.138397658	0.032831755	0.180695008	0.005173898	-0.277162518	1.43E-05	-0.021071839	0.746388608
MRPL54	blue	-0.291084688	4.97E-06	0.291084688	4.97E-06	0.390454962	4.34E-10	0.323489215	3.36E-07	0.377602737	1.75E-09	0.32718595	2.42E-07	-0.156244368	0.01584068	-0.175412473	0.006668688	-0.005370308	0.934317917	-0.343313139	5.49E-08	-0.497676462	2.68E-16	-0.46457974	3.82E-14	0.016021161	0.805777485	-0.08044459	0.216269136	-0.093255555	0.151506779	-0.213482374	0.000918408	0.078845375	0.225569536	0.05193975	0.425098394
SMARCA1	blue	0.504326299	9.26E-17	-0.504326299	9.26E-17	-0.132963879	0.040405784	-0.194047349	0.002642871	-0.134840511	0.037638583	0.031767832	0.625809742	0.485281373	1.83E-15	0.238582898	0.00020313	0.244564469	0.000138334	0.699746014	2.50E-36	0.81953354	5.38E-59	0.712188906	3.93E-38	-0.331521823	1.64E-07	-0.083289341	0.200409318	-0.09659171	0.137338591	-0.016231234	0.803282379	-0.552870612	1.88E-20	-0.057827017	0.374455545
CHD1	blue	0.534510286	5.50E-19	-0.534510286	5.50E-19	-0.122271609	0.059638545	-0.40743627	6.22E-11	-0.452668419	2.00E-13	-0.090005542	0.166346786	0.392317374	3.52E-10	0.217537112	0.000727804	0.039245103	0.546848972	0.476992695	6.33E-15	0.741871297	7.58E-43	0.66731289	4.86E-32	-0.011896682	0.855132861	0.060757776	0.35068938	0.22765975	0.000399711	0.189265822	0.003378557	-0.356773351	1.49E-08	0.011855116	0.855633489
BMT2	blue	0.567757124	1.04E-21	-0.567757124	1.04E-21	-0.146548985	0.023748954	-0.392268078	3.54E-10	-0.274442184	1.75E-05	-0.175514939	0.006636363	0.328486813	2.15E-07	0.155185673	0.01657433	0.185912483	0.004000124	0.665051628	9.24E-32	0.836400643	1.47E-63	0.635796298	2.33E-28	-0.261060009	4.56E-05	-0.027847637	0.669063616	-0.004954527	0.939393027	0.091794447	0.158049459	-0.461217679	6.13E-14	0.092401989	0.15530359
ZNF75A	blue	0.483294961	2.47E-15	-0.483294961	2.47E-15	-0.107031223	0.099508913	-0.306952746	1.38E-06	-0.469399501	1.92E-14	-0.305135045	1.61E-06	0.262241218	4.20E-05	0.175994311	0.006486987	0.004936194	0.939616868	0.397034527	2.07E-10	0.722904965	9.19E-40	0.523910353	3.53E-18	0.12864491	0.047430784	0.125893732	0.052417037	0.063983223	0.325658748	0.010527986	0.87164666	-0.478530092	5.04E-15	0.196000252	0.002386761
GNPDA2	blue	0.568996893	8.10E-22	-0.568996893	8.10E-22	-0.369030901	4.31E-09	-0.496488135	3.23E-16	-0.432349929	2.93E-12	-0.14726513	0.02306611	0.482691735	2.70E-15	0.204098453	0.001548234	0.264068944	3.69E-05	0.574500739	2.66E-22	0.752793131	9.51E-45	0.693012434	2.16E-35	-0.096597618	0.137314432	0.036603987	0.574174538	0.076851878	0.237555622	0.028059474	0.666696513	-0.296007517	3.37E-06	0.152834622	0.018310365
DCLRE1C	blue	0.507090427	5.91E-17	-0.507090427	5.91E-17	-0.074078808	0.254961769	-0.419536098	1.45E-11	-0.366885729	5.38E-09	-0.397260703	2.02E-10	0.115301501	0.075840844	0.293627329	4.07E-06	0.097544734	0.133483737	0.486599608	1.50E-15	0.714070459	2.06E-38	0.45094917	2.53E-13	-0.093207422	0.151718999	0.146159721	0.024127375	0.095394518	0.142301267	0.270639668	2.31E-05	-0.39841812	1.77E-10	0.061478051	0.34499726
SCYL2	blue	0.546942327	5.71E-20	-0.546942327	5.71E-20	-0.636912557	1.76E-28	-0.610478236	1.07E-25	-0.358344157	1.28E-08	-0.158724359	0.014232221	0.204244193	0.00153599	0.147720887	0.022640425	0.101203057	0.119455035	0.512961201	2.25E-17	0.630756196	8.27E-28	0.618959661	1.46E-26	-0.191226249	0.003057023	0.066853557	0.304379977	0.018492935	0.776550358	0.194463799	0.002586251	0.249560651	9.96E-05	0.069669018	0.284419581
EIF3K	blue	-0.178756422	0.00568338	0.178756422	0.00568338	0.154397755	0.017139418	-0.043774353	0.501529815	0.154330896	0.017188132	-0.173246801	0.007385612	-0.324375182	3.11E-07	-0.051107028	0.432569174	-0.091066512	0.161387389	-0.215193565	0.000832964	-0.352943239	2.18E-08	-0.277981493	1.35E-05	-0.052916309	0.416433315	0.106971063	0.099700394	-0.002898407	0.964522487	-0.035346911	0.587402315	0.296570795	3.22E-06	0.017542076	0.787758939
GMPS	blue	0.457133422	1.08E-13	-0.457133422	1.08E-13	-0.287039446	6.80E-06	-0.105429647	0.104706814	-0.030654687	0.637970509	-0.092771091	0.153653042	0.314116658	7.57E-07	0.155434215	0.016399483	0.335836587	1.10E-07	0.6981182	4.23E-36	0.764798528	5.89E-47	0.532720882	7.56E-19	-0.370472794	3.71E-09	-0.172748508	0.007559987	-0.188628617	0.003489474	-0.005107663	0.937523515	-0.546271039	6.47E-20	0.008475179	0.896516851
TMTC2	blue	0.48045107	3.78E-15	-0.48045107	3.78E-15	-0.246998914	0.000117984	-0.22571117	0.00044952	-0.156961813	0.015359786	-0.088455369	0.173796394	0.314851401	7.11E-07	0.156097058	0.015941031	-0.003732359	0.95432448	0.500418912	1.73E-16	0.597155152	2.17E-24	0.524545675	3.16E-18	-0.224061046	0.000496138	-0.0540113	0.406841617	0.023393283	0.719562857	0.380800126	1.25E-09	-0.261186897	4.52E-05	-0.031370442	0.630139732
USP47	blue	0.51467951	1.69E-17	-0.51467951	1.69E-17	-0.093070072	0.152325806	-0.248955354	0.000103699	-0.167761301	0.009517839	0.002691665	0.967051605	0.485594643	1.74E-15	0.17224128	0.007741245	0.1687333	0.009104297	0.5787278	1.12E-22	0.671226868	1.58E-32	0.562345068	3.02E-21	-0.17164644	0.007958733	-0.118475161	0.068068335	-0.082607087	0.20413379	0.289205498	5.75E-06	-0.440169088	1.07E-12	0.197299618	0.002229092
USP53	blue	0.586805632	2.05E-23	-0.586805632	2.05E-23	-0.293152542	4.22E-06	-0.38066321	1.26E-09	-0.072909256	0.262560765	-0.054021356	0.406754141	0.326527778	2.57E-07	0.133654778	0.039367707	0.365993873	5.89E-09	0.81089371	7.72E-57	0.791506942	2.23E-52	0.740653285	1.22E-42	-0.459952236	7.32E-14	-0.173887756	0.00716659	-0.135888255	0.036164546	0.196366634	0.002341307	-0.200282648	0.001902374	0.050311825	0.439773328
ZNF292	blue	0.59553301	3.10E-24	-0.59553301	3.10E-24	-0.308738041	1.19E-06	-0.604481226	4.22E-25	-0.380974171	1.22E-09	-0.170970752	0.008212364	0.28779691	6.41E-06	0.182074315	0.004836778	0.232692877	0.000293764	0.600839095	9.58E-25	0.733001889	2.26E-41	0.675882236	4.04E-33	-0.19192373	0.002949492	0.014125579	0.828377983	-0.035656248	0.584134291	0.173269231	0.007377848	0.007925927	0.903189357	0.094556544	0.145855485
NOSTRIN	blue	0.415908056	2.26E-11	-0.415908056	2.26E-11	-0.167872515	0.009469694	-0.26467239	3.54E-05	-0.431937691	3.09E-12	-0.267253074	2.95E-05	0.148342894	0.022070417	0.108194604	0.095863065	-0.112708669	0.082711887	0.264318685	3.63E-05	0.598428251	1.64E-24	0.407596989	6.10E-11	0.118194508	0.068728335	0.144152236	0.026162477	0.258753459	5.35E-05	0.011223394	0.863248908	-0.383770826	9.04E-10	-0.027099296	0.677451768
OIP5	blue	0.493323468	5.31E-16	-0.493323468	5.31E-16	-0.371989971	3.17E-09	-0.15963838	0.013676578	0.074964618	0.249308428	-0.077109329	0.235983015	0.223308634	0.000518848	0.101205802	0.119444956	0.329695507	1.93E-07	0.641576028	5.31E-29	0.639496274	9.07E-29	0.472520713	1.22E-14	-0.439541687	1.16E-12	-0.2011936	0.001811688	-0.088698596	0.172611424	0.094793333	0.144844381	-0.312647122	8.57E-07	0.072287241	0.266664896
CBLB	blue	0.469014321	2.03E-14	-0.469014321	2.03E-14	-0.301790297	2.11E-06	-0.141581482	0.028982454	-0.350608867	2.73E-08	-0.150103048	0.020524128	0.320599281	4.33E-07	0.213060889	0.000940658	0.019065783	0.769819795	0.369722068	4.02E-09	0.713088661	2.89E-38	0.538827435	2.53E-19	-0.0010212	0.987496572	0.229770034	0.000351578	0.249769458	9.82E-05	-0.002220445	0.972817304	-0.482490997	2.79E-15	-0.130549879	0.044215626
ATP7A	blue	0.457402382	1.04E-13	-0.457402382	1.04E-13	-0.010785021	0.868540977	-0.363257488	7.79E-09	-0.22835172	0.000383292	-0.369447784	4.13E-09	0.064036803	0.325252941	0.226471621	0.000429434	0.257320107	5.90E-05	0.503181467	1.11E-16	0.609599864	1.31E-25	0.356162901	1.58E-08	-0.159957509	0.01348711	-0.014649662	0.822114505	-0.051215574	0.431591092	0.322204208	3.76E-07	-0.388567753	5.34E-10	0.125794332	0.052605048
SUGT1	blue	0.592978146	5.42E-24	-0.592978146	5.42E-24	-0.405933043	7.42E-11	-0.508638565	4.59E-17	-0.352053281	2.37E-08	-0.344321501	4.99E-08	0.155136982	0.016608773	0.204253771	0.001535188	0.225203047	0.000463423	0.636201314	2.10E-28	0.795975893	2.31E-53	0.57037478	6.14E-22	-0.219049419	0.0006666	-0.078942575	0.224996284	0.036324854	0.577099627	0.263243686	3.91E-05	-0.252812281	8.02E-05	0.090410593	0.164440148
DPY19L3	blue	0.516867021	1.17E-17	-0.516867021	1.17E-17	-0.153999713	0.017431222	-0.460104511	7.17E-14	-0.448228927	3.66E-13	-0.094029123	0.148126882	0.311593785	9.37E-07	0.173672358	0.007239539	0.105161199	0.10559865	0.412729819	3.32E-11	0.644084862	2.76E-29	0.561532131	3.54E-21	0.067811008	0.297490857	0.096953772	0.135864172	0.057530562	0.37691346	0.012442223	0.84856784	-0.303735165	1.80E-06	0.1523894	0.018656363
ASNA1	blue	-0.403435865	9.92E-11	0.403435865	9.92E-11	0.19779253	0.002171804	0.540952782	1.72E-19	0.429175681	4.39E-12	0.279860451	1.17E-05	-0.028268682	0.664362021	-0.179972201	0.005358858	0.033366903	0.608516616	-0.400695286	1.36E-10	-0.577380259	1.47E-22	-0.437836922	1.44E-12	0.052701492	0.418330465	-0.107687726	0.097438259	0.0250273	0.700882253	-0.176595663	0.006303855	0.07540914	0.24650449	-0.127901576	0.048737264
HAUS6	blue	0.55049651	2.94E-20	-0.55049651	2.94E-20	-0.150630568	0.02007938	-0.411588858	3.80E-11	-0.329993679	1.88E-07	-0.015992318	0.806120224	0.592864342	5.56E-24	0.253841296	7.48E-05	0.091360867	0.160031317	0.598629953	1.57E-24	0.784749718	6.20E-51	0.765499562	4.34E-47	-0.187358754	0.003720387	-0.009705296	0.881600003	0.112650502	0.082871597	0.096948549	0.135885354	-0.410713342	4.22E-11	0.03805277	0.559105641
SRD5A3	blue	0.352664042	2.24E-08	-0.352664042	2.24E-08	-0.086410016	0.184000885	-0.121426507	0.06143648	0.060273163	0.354552228	-0.105610612	0.104108972	0.14792942	0.022447925	0.11689271	0.07185838	0.301522714	2.16E-06	0.546231962	6.52E-20	0.541977078	1.43E-19	0.366637776	5.52E-09	-0.408511475	5.48E-11	-0.150050224	0.020569131	-0.06421791	0.323883687	0.064642811	0.320685908	-0.320880707	4.22E-07	-0.029887931	0.646404015
HSPBAP1	blue	0.482997867	2.58E-15	-0.482997867	2.58E-15	-0.150945142	0.019818162	-0.411630705	3.78E-11	-0.3961272	2.29E-10	-0.383959612	8.86E-10	0.098190945	0.130917605	0.209488882	0.00115012	0.121060825	0.062228163	0.491698819	6.83E-16	0.753467972	7.20E-45	0.454358213	1.59E-13	-0.078292521	0.228849775	0.087270646	0.179654644	0.074357463	0.253173889	0.00558021	0.931756802	-0.400763776	1.35E-10	0.128984655	0.046843465
ESF1	blue	0.49819455	2.47E-16	-0.49819455	2.47E-16	-0.270105169	2.40E-05	-0.43341579	2.56E-12	-0.184842087	0.004219229	-0.267121813	2.97E-05	0.097653574	0.13304884	0.206769677	0.001337408	0.167913665	0.009451934	0.599400462	1.32E-24	0.634191833	3.50E-28	0.54760019	5.06E-20	-0.34632392	4.13E-08	-0.114179803	0.078754332	-0.029774833	0.647651833	0.589675898	1.11E-23	-0.016864717	0.795770414	0.144561937	0.025735565
NDNF	blue	0.328175852	2.21E-07	-0.328175852	2.21E-07	-0.313059744	8.28E-07	-0.211685235	0.001016774	-0.337059796	9.86E-08	-0.114800081	0.077132242	0.188814351	0.003456808	0.096194423	0.13897053	0.041202972	0.527014084	0.196792039	0.002289518	0.430003015	3.95E-12	0.264288082	3.64E-05	0.126890654	0.05056211	0.06292033	0.333776485	0.040756119	0.531508762	0.020091419	0.757812534	-0.277607316	1.39E-05	-0.046839737	0.47201849
SEPP1	blue	0.338249154	8.83E-08	-0.338249154	8.83E-08	-0.001625484	0.980099041	-0.383108024	9.71E-10	-0.349249338	3.11E-08	-0.34098982	6.84E-08	0.155694142	0.016218352	0.136679788	0.035083653	0.040634898	0.532731376	0.258075019	5.60E-05	0.431495028	3.27E-12	0.325378774	2.84E-07	0.015088252	0.816881411	0.137179228	0.03441583	0.079735514	0.220358424	0.132570444	0.04100716	-0.233594522	0.000277799	0.083052791	0.201695036
CFH	blue	0.123920645	0.056255097	-0.123920645	0.056255097	-0.019256115	0.767587314	-0.271234487	2.21E-05	-0.27458716	1.73E-05	-0.195374924	0.0024662	-0.067054546	0.302925152	0.241866468	0.000164704	-0.281646965	1.03E-05	0.05445209	0.403017738	0.222571517	0.000542026	0.151936537	0.019014116	0.013033348	0.841466027	0.232683896	0.000293927	0.203298097	0.001617083	0.119070834	0.066684669	-0.071667136	0.270799869	-0.084303564	0.194964083
CRNKL1	blue	0.596373984	2.58E-24	-0.596373984	2.58E-24	-0.164221843	0.011167828	-0.436662226	1.68E-12	-0.459097085	8.25E-14	-0.102146286	0.116030998	0.459610076	7.68E-14	0.192566546	0.002853437	0.071765775	0.270139222	0.521885226	5.00E-18	0.807982236	3.89E-56	0.693404938	1.91E-35	0.02230405	0.732109227	0.089595822	0.168292158	0.132870232	0.040548248	0.058910104	0.365559635	-0.435737629	1.90E-12	0.144060981	0.02625839
PPP4C	blue	-0.31984567	4.62E-07	0.31984567	4.62E-07	0.055721145	0.392128739	0.30119648	2.22E-06	0.457987239	9.63E-14	0.55338122	1.70E-20	-0.032869133	0.613877071	-0.129413188	0.046111342	-0.036662444	0.573562835	-0.329549546	1.96E-07	-0.589674998	1.11E-23	-0.386019491	7.07E-10	-0.072856723	0.262905696	-0.108182062	0.095901795	-0.111669547	0.085602614	-0.089514255	0.168681463	0.42603209	6.51E-12	-0.017974381	0.782657432
C2orf69	blue	0.555316168	1.18E-20	-0.555316168	1.18E-20	-0.267967732	2.80E-05	-0.625364306	3.12E-27	-0.318643324	5.13E-07	-0.230947767	0.000327115	0.222381743	0.000548147	0.215013724	0.000841587	0.208745899	0.001198745	0.702330446	1.07E-36	0.77254946	1.88E-48	0.703116886	8.28E-37	-0.333515733	1.37E-07	-0.0572313	0.379404657	-0.031681012	0.626754656	0.208810043	0.001194473	-0.048191343	0.459314735	0.056949182	0.381762335
LRPPRC	blue	0.493526843	5.14E-16	-0.493526843	5.14E-16	-0.228213312	0.000386525	-0.367821233	4.89E-09	-0.1794575	0.005494158	-0.181818972	0.004897656	0.24610893	0.000125074	0.190565901	0.003162091	0.261671348	4.37E-05	0.592243506	6.36E-24	0.643398617	3.31E-29	0.493966057	4.80E-16	-0.218411894	0.000691797	-0.040534339	0.533746681	-0.073406143	0.259313532	0.143232741	0.027142791	-0.358292651	1.28E-08	0.086827591	0.18188254
ROBO1	blue	0.354173428	1.93E-08	-0.354173428	1.93E-08	-0.120561889	0.063321846	-0.43483835	2.13E-12	-0.283789898	8.72E-06	-0.142525608	0.02791797	0.21699236	0.000751093	0.389950362	4.59E-10	0.056754805	0.383391932	0.494086782	4.71E-16	0.608903751	1.54E-25	0.597285235	2.11E-24	-0.244534999	0.000138599	0.182696475	0.004691282	0.132760674	0.040715454	0.140352019	0.030420531	-0.151491354	0.019371596	-0.196571059	0.002316289
DPH6	blue	0.486145696	1.60E-15	-0.486145696	1.60E-15	-0.101549247	0.118189298	-0.188233491	0.003559895	-0.117127684	0.071284979	-0.009786292	0.880619213	0.458202118	9.35E-14	0.272406751	2.03E-05	0.292625075	4.40E-06	0.60398507	4.73E-25	0.687901748	1.07E-34	0.535551008	4.57E-19	-0.245271657	0.000132107	-0.063443294	0.329766323	-0.141462394	0.029119157	-0.00595449	0.92719179	-0.57069755	5.75E-22	0.095577635	0.141533459
CLK4	blue	0.556174117	1.00E-20	-0.556174117	1.00E-20	-0.248963402	0.000103644	-0.301894473	2.10E-06	-0.373870563	2.60E-09	-0.226723807	0.000422959	0.296846446	3.15E-06	0.186387609	0.0039062	0.153725721	0.017634593	0.486864435	1.44E-15	0.762009601	1.97E-46	0.511100985	3.06E-17	-0.011077272	0.865012234	0.067523562	0.299548147	0.005332874	0.93477473	0.172353288	0.007700889	-0.438050864	1.41E-12	0.116161628	0.073666464
CENPE	blue	0.5188539	8.37E-18	-0.5188539	8.37E-18	-0.497861635	2.60E-16	-0.573657925	3.16E-22	-0.361694584	9.12E-09	-0.148234283	0.022169044	0.348106605	3.48E-08	0.204382454	0.001524456	0.156247676	0.015838432	0.484791444	1.97E-15	0.598302654	1.69E-24	0.602626227	6.42E-25	-0.162699031	0.011952151	0.022166612	0.733697466	0.189864191	0.003277315	0.155942295	0.016047059	0.057064569	0.380796961	0.135684095	0.036447873
BEX2	blue	0.378686928	1.56E-09	-0.378686928	1.56E-09	-0.034720976	0.594040658	-0.297865612	2.90E-06	-0.20415186	0.001543737	-0.230592738	0.000334318	-0.042514234	0.513936961	0.014035893	0.829450953	0.100054925	0.12372846	0.254759315	7.03E-05	0.345254269	4.57E-08	0.1596928	0.013644105	0.041943738	0.519605788	0.044996997	0.489644002	-0.214697395	0.000856953	0.054361678	0.40380032	-0.199102691	0.002025994	0.207219658	0.0013046
ARID4A	blue	0.676335509	3.54E-33	-0.676335509	3.54E-33	-0.30775677	1.29E-06	-0.475542332	7.83E-15	-0.477094041	6.23E-15	-0.16242505	0.012098303	0.454516666	1.56E-13	0.207946129	0.001253189	0.189978015	0.00325837	0.614510873	4.19E-26	0.907208909	1.02E-90	0.743486076	4.02E-43	-0.057678566	0.375685126	0.102597814	0.114419255	0.086837595	0.181832012	0.120481794	0.063498878	-0.408262081	5.64E-11	0.13213314	0.041684415
PNMAL1	blue	0.169810062	0.008664861	-0.169810062	0.008664861	-0.285455443	7.68E-06	-0.129716394	0.045599138	-0.136665568	0.035102826	-0.246820053	0.000119378	-0.046719958	0.4731535	0.177048	0.006169164	0.184619924	0.004266038	0.212229129	0.000986027	0.318947378	5.00E-07	0.127238838	0.049927274	-0.049197204	0.449985508	0.166936968	0.00988151	0.028068423	0.66659659	-0.095537477	0.141701569	-0.158511313	0.014364542	-0.043101934	0.508130783
ALDH6A1	blue	0.48002769	4.03E-15	-0.48002769	4.03E-15	-0.204565954	0.00150927	-0.318897397	5.02E-07	-0.189744314	0.003297375	-0.188184134	0.003568782	0.162337887	0.012145128	0.142768774	0.027649292	0.151985924	0.018974814	0.544876523	8.38E-20	0.652762818	2.76E-30	0.421227097	1.18E-11	-0.19954216	0.001979121	-0.039915281	0.540018354	-0.103068756	0.11275692	0.15739199	0.015077609	-0.359690678	1.12E-08	0.038244094	0.55713002
PROS1	blue	0.342532775	5.91E-08	-0.342532775	5.91E-08	-0.119447475	0.065821723	-0.37634705	2.01E-09	-0.114869604	0.076952131	-0.102396997	0.115133901	0.215495707	0.000818662	0.187390727	0.003714408	0.043630451	0.502938665	0.572902259	3.68E-22	0.57569517	2.08E-22	0.5842626	3.51E-23	-0.424337673	8.04E-12	-0.061141169	0.34765221	-0.039911155	0.540060275	0.14838096	0.022035939	-0.127642978	0.049198756	-0.045640611	0.483448242
BIRC2	blue	0.534580327	5.43E-19	-0.534580327	5.43E-19	-0.200053765	0.001925801	-0.643324347	3.37E-29	-0.491769674	6.76E-16	-0.342766385	5.78E-08	0.19556461	0.002441853	0.304871012	1.64E-06	0.019570027	0.763909491	0.558181324	6.79E-21	0.785300356	4.75E-51	0.654834916	1.57E-30	-0.154466015	0.017089806	0.118490586	0.068032209	0.155985045	0.01601771	0.251732822	8.62E-05	-0.217744479	0.000719116	0.040263286	0.536488206
THAP10	blue	0.488282676	1.16E-15	-0.488282676	1.16E-15	-0.455259882	1.40E-13	-0.303138518	1.89E-06	-0.088215972	0.174968592	-0.215474633	0.000819652	0.202287502	0.001708014	0.147168396	0.023157345	0.235651148	0.000244359	0.663374945	1.48E-31	0.721306578	1.63E-39	0.510514966	3.37E-17	-0.399542608	1.55E-10	-0.078595551	0.227047655	-0.096187276	0.139000022	0.071260736	0.273533378	-0.281323745	1.05E-05	0.114375233	0.078240313
EIF3F	blue	0.536109839	4.13E-19	-0.536109839	4.13E-19	-0.02427851	0.709421162	-0.310261165	1.05E-06	-0.356191137	1.58E-08	-0.381539174	1.15E-09	0.07280404	0.263251929	0.186644927	0.003856168	0.155925382	0.016058682	0.478902498	4.77E-15	0.746399721	1.27E-43	0.43469114	2.17E-12	-0.048494434	0.456492331	0.022280047	0.732386529	0.030917423	0.635091296	0.180549514	0.005210661	-0.511694618	2.78E-17	0.080516085	0.21585985
HLTF	blue	0.518126345	9.47E-18	-0.518126345	9.47E-18	-0.114800173	0.077132004	-0.376994673	1.87E-09	-0.5971955	2.15E-24	-0.155478707	0.016368354	0.405830878	7.51E-11	0.098491062	0.129738831	-0.15178869	0.019132196	0.35008006	2.87E-08	0.766878123	2.37E-47	0.644034918	2.80E-29	0.170577238	0.008363365	0.110965827	0.087605965	0.195119537	0.002499328	0.027300951	0.675187445	-0.445276252	5.43E-13	0.116101772	0.073816121
HIST1H2AC	blue	0.379024501	1.51E-09	-0.379024501	1.51E-09	-0.297145604	3.07E-06	-0.431127085	3.42E-12	-0.236008441	0.000238946	-0.212250311	0.000984848	0.046387616	0.476310527	0.114586417	0.077687912	0.225236727	0.00046249	0.35940828	1.15E-08	0.402916813	1.05E-10	0.271092268	2.24E-05	-0.095697205	0.141033813	-0.073684998	0.257503335	0.047228452	0.46834537	0.117461509	0.070476772	0.003653392	0.955289837	0.146903286	0.023408981
ANKRD13C	blue	0.681056522	8.64E-34	-0.681056522	8.64E-34	-0.245321602	0.000131677	-0.398977103	1.66E-10	-0.376074022	2.06E-09	-0.045956763	0.480420355	0.478960188	4.73E-15	0.156456247	0.015697309	0.226149242	0.000437845	0.601639775	8.01E-25	0.849721496	1.50E-67	0.719749173	2.83E-39	-0.091525446	0.159276853	0.006305973	0.922906994	0.057388234	0.378097013	0.013692574	0.833561171	-0.429015301	4.48E-12	0.11348631	0.080600422
KDM6A	blue	0.327236462	2.41E-07	-0.327236462	2.41E-07	-0.199791831	0.001952934	-0.152305132	0.018722487	-0.014845538	0.819776404	0.139456521	0.031505926	0.427264852	5.58E-12	0.245963065	0.000126273	0.28002977	1.16E-05	0.550337208	3.03E-20	0.562238544	3.09E-21	0.55671681	9.01E-21	-0.355597977	1.68E-08	-0.001206958	0.985222419	0.003508931	0.957056018	0.040833205	0.530732014	-0.238412966	0.000205331	-0.557289111	8.07E-21
NAT1	blue	0.642340146	4.35E-29	-0.642340146	4.35E-29	-0.231523963	0.000315733	-0.521044986	5.77E-18	-0.475540303	7.84E-15	-0.140121745	0.030696542	0.425661099	6.82E-12	0.166308731	0.010166875	0.094666754	0.145384214	0.548941384	3.94E-20	0.805930666	1.20E-55	0.695440771	9.99E-36	-0.032895643	0.613591068	0.042837069	0.510743276	0.101123053	0.11974904	0.048557092	0.455910066	-0.374677673	2.39E-09	0.164861729	0.010852047
LAMB1	blue	0.254049857	7.37E-05	-0.254049857	7.37E-05	-0.011739442	0.857026958	-0.12919107	0.046489615	-0.433541773	2.52E-12	-0.185854489	0.004011727	0.226500995	0.000428675	0.125240618	0.053662645	-0.138941411	0.032145096	0.113738013	0.079926389	0.459768722	7.51E-14	0.422682572	9.88E-12	0.181625521	0.004944236	0.16649415	0.010081903	0.311610871	9.36E-07	0.104475566	0.10790365	-0.386974228	6.37E-10	-0.046009736	0.479914017
NCAPG	blue	0.362177369	8.69E-09	-0.362177369	8.69E-09	0.211933082	0.001002656	-0.130689894	0.043986702	-0.110632839	0.088566928	-0.225135404	0.000465304	0.148232733	0.022170455	0.196925474	0.00227349	0.171827862	0.007891832	0.450536089	2.68E-13	0.620784398	9.45E-27	0.359168342	1.18E-08	-0.217059514	0.000748185	-0.078532049	0.227424467	0.105004948	0.1061205	-0.010250508	0.875001567	-0.590611783	9.06E-24	0.010041463	0.877530535
RPS6KC1	blue	0.53052498	1.11E-18	-0.53052498	1.11E-18	-0.212855902	0.000951657	-0.203068572	0.001637337	-0.338242656	8.84E-08	-0.095627203	0.141326163	0.41571267	2.32E-11	0.182062554	0.004839567	0.153705226	0.017649887	0.513642903	2.01E-17	0.794155383	5.85E-53	0.5828802	4.69E-23	-0.027893987	0.668545411	0.011767868	0.856684482	0.073495146	0.25873482	-0.00784713	0.904147181	-0.628826848	1.33E-27	0.088691454	0.172646132
ZNF431	blue	0.501832008	1.38E-16	-0.501832008	1.38E-16	-0.303780864	1.80E-06	-0.255854879	6.52E-05	-0.052735244	0.418032051	-0.051129085	0.432370323	0.36227098	8.61E-09	0.128599714	0.047509376	0.410421914	4.37E-11	0.750034983	2.94E-44	0.767359225	1.91E-47	0.660571668	3.25E-31	-0.416016334	2.23E-11	-0.167615713	0.009581192	-0.18593783	0.003995062	-0.030932453	0.634926762	-0.339946994	7.54E-08	0.054758659	0.400370897
NAPEPLD	blue	0.477361359	5.99E-15	-0.477361359	5.99E-15	-0.260345507	4.79E-05	-0.373253066	2.78E-09	-0.179698315	0.005430478	-0.20127704	0.001803582	0.195663922	0.002429193	0.30770623	1.30E-06	0.282991093	9.26E-06	0.577302427	1.50E-22	0.645241988	2.04E-29	0.438235855	1.37E-12	-0.270921864	2.26E-05	0.013322212	0.83800023	-0.073480788	0.258828119	0.291425159	4.83E-06	-0.304404592	1.71E-06	0.06354201	0.329012851
PIGX	blue	0.547040087	5.61E-20	-0.547040087	5.61E-20	-0.328101808	2.23E-07	-0.40873227	5.34E-11	-0.166778149	0.009952972	-0.162497098	0.012059718	0.234148636	0.000268393	0.231862217	0.000309223	0.174201171	0.007061617	0.676332857	3.54E-33	0.726159936	2.84E-40	0.663086487	1.61E-31	-0.404722045	8.54E-11	-0.091524308	0.159282062	-0.004277745	0.947659121	0.276878116	1.46E-05	-0.142503511	0.027942496	-0.066429428	0.307465079
PKD2	blue	0.389020011	5.08E-10	-0.389020011	5.08E-10	-0.135528999	0.036664365	-0.227724105	0.000398157	-0.333428767	1.38E-07	0.016576193	0.799189503	0.443360071	7.00E-13	0.190084078	0.003240806	0.141518436	0.029054756	0.501520373	1.45E-16	0.727162654	1.97E-40	0.678093887	2.10E-33	-0.094001062	0.148248481	0.018704655	0.774060824	0.064833287	0.319259077	-0.091229673	0.160634655	-0.443016176	7.33E-13	-0.018143576	0.78066331
OMA1	blue	0.567653918	1.06E-21	-0.567653918	1.06E-21	-0.262789454	4.04E-05	-0.599457421	1.30E-24	-0.470993586	1.52E-14	-0.46278725	4.92E-14	0.017222224	0.791539276	0.187186462	0.003752759	0.067088398	0.302680573	0.487589894	1.29E-15	0.707241912	2.10E-37	0.476472304	6.83E-15	-0.033889232	0.602914063	0.119332975	0.066083088	0.057212299	0.379563174	0.355556958	1.68E-08	-0.110500903	0.088950005	0.169232553	0.008898147
FAM199X	blue	0.59955297	1.28E-24	-0.59955297	1.28E-24	-0.115046294	0.076495916	-0.337899473	9.12E-08	-0.267956775	2.80E-05	-0.10963217	0.091505616	0.255635881	6.62E-05	0.067792718	0.297621479	0.034983624	0.591250998	0.4943872	4.49E-16	0.702473455	1.02E-36	0.532159738	8.35E-19	-0.122581529	0.058990163	-0.084662964	0.193060621	0.05506023	0.397777356	0.038697116	0.5524656	-0.390376765	4.37E-10	0.144478602	0.025821913
USP6NL	blue	0.325812877	2.73E-07	-0.325812877	2.73E-07	-0.076126536	0.242025787	-0.319371327	4.82E-07	-0.155729826	0.016193623	-0.045120344	0.488453326	0.171017002	0.008194777	0.045652757	0.483331726	-0.076155344	0.241847129	0.386768929	6.51E-10	0.4781138	5.36E-15	0.422503192	1.01E-11	-0.138124055	0.033181959	0.06579489	0.312118956	0.035228084	0.588659908	-0.051799529	0.426351118	-0.216453746	0.000774793	-0.042650546	0.512587215
ZNF432	blue	0.562732149	2.80E-21	-0.562732149	2.80E-21	-0.049803587	0.444413334	-0.543906835	1.00E-19	-0.471939272	1.33E-14	-0.458339638	9.17E-14	-0.036733446	0.572820282	0.126962603	0.050430379	0.071503704	0.271896893	0.374080404	2.55E-09	0.65232481	3.10E-30	0.292935584	4.29E-06	0.059742891	0.358809489	0.098376646	0.130187254	0.046531902	0.474938499	0.137980385	0.033367119	-0.357522693	1.38E-08	0.173995309	0.007130411
UBLCP1	blue	0.54295692	1.19E-19	-0.54295692	1.19E-19	-0.476020903	7.30E-15	-0.552404433	2.05E-20	-0.362279553	8.60E-09	-0.261878849	4.31E-05	0.128306087	0.048022622	0.208947305	0.00118538	0.136127852	0.035834422	0.5197981	7.13E-18	0.656344775	1.04E-30	0.57748104	1.44E-22	-0.122861779	0.058408871	0.097867908	0.132195607	0.054318756	0.404172151	0.239961983	0.000186071	0.057995513	0.373062936	0.120935157	0.062502157
BBS2	blue	0.373353039	2.75E-09	-0.373353039	2.75E-09	-0.120215212	0.064091026	-0.207863876	0.001258915	-0.027032901	0.678197932	-0.105835922	0.103368401	0.231467247	0.000316836	0.244392701	0.000139887	0.313594824	7.91E-07	0.69029965	5.07E-35	0.702741068	9.37E-37	0.51239951	2.47E-17	-0.457437547	1.04E-13	-0.126419655	0.051431552	-0.195399313	0.002463057	-0.013435126	0.836646314	-0.45820975	9.34E-14	-0.01513566	0.81631623
EAF1	blue	0.401333508	1.27E-10	-0.401333508	1.27E-10	-0.217921649	0.000711768	-0.209996787	0.00111793	-0.075575596	0.2454602	0.097614315	0.133205583	0.267379586	2.92E-05	0.069982057	0.282255929	0.39209615	3.61E-10	0.561515034	3.56E-21	0.583002219	4.58E-23	0.544911322	8.33E-20	-0.295740664	3.44E-06	-0.196699207	0.00230073	-0.097406508	0.134037629	-0.007003704	0.914407914	-0.211292841	0.001039502	-0.051274465	0.431060971
SGIP1	blue	0.525868127	2.52E-18	-0.525868127	2.52E-18	-0.158488756	0.014378615	-0.275284412	1.65E-05	-0.410244827	4.46E-11	-0.200970641	0.001833511	0.283453304	8.94E-06	0.143698375	0.026642491	0.079153886	0.223753616	0.361501005	9.30E-09	0.68783713	1.09E-34	0.527511616	1.89E-18	0.051790646	0.426430551	0.122182298	0.059826479	0.256233862	6.36E-05	-0.06320758	0.33156996	-0.46564099	3.28E-14	-0.007192917	0.912104738
SLC38A6	blue	0.553199746	1.76E-20	-0.553199746	1.76E-20	-0.223788543	0.000504255	-0.296647433	3.20E-06	-0.530922751	1.04E-18	-0.137376545	0.03415498	0.318743849	5.08E-07	0.162174731	0.012233207	-0.00722281	0.911740937	0.261363034	4.46E-05	0.677276441	2.68E-33	0.470287042	1.69E-14	0.217394598	0.000733832	0.237027974	0.000224111	0.339956502	7.53E-08	-0.027509799	0.672845442	-0.484434309	2.08E-15	0.092601777	0.154408527
C3orf80	blue	0.357923128	1.33E-08	-0.357923128	1.33E-08	-0.209759506	0.001132864	-0.321949275	3.85E-07	-0.226056494	0.000440293	-0.125095894	0.053941958	0.12016342	0.064206594	0.007889577	0.903631202	0.017265834	0.791023562	0.254737746	7.04E-05	0.39363884	3.04E-10	0.360765602	1.00E-08	-0.098607207	0.129284849	0.093602714	0.149982811	0.279130028	1.24E-05	-0.033272001	0.609537005	-0.043841277	0.500875313	0.009495371	0.884142824
AGL	blue	0.619015587	1.44E-26	-0.619015587	1.44E-26	-0.457879957	9.77E-14	-0.602736655	6.26E-25	-0.41541029	2.40E-11	-0.27493364	1.69E-05	0.256989488	6.04E-05	0.219118809	0.00066391	0.117385277	0.070660673	0.661398942	2.58E-31	0.852561509	1.89E-68	0.724296845	5.57E-40	-0.243446376	0.000148742	0.013047922	0.841291096	0.02756427	0.672235117	0.185384531	0.004106877	-0.094084998	0.147884989	0.106551753	0.101043115
NAF1	blue	0.321508023	4.00E-07	-0.321508023	4.00E-07	-0.281981516	1.00E-05	-0.058859212	0.365974674	0.039421806	0.545043849	-0.055146515	0.397037159	0.013858609	0.831572828	0.014155433	0.828020891	0.185610227	0.00406093	0.395787215	2.38E-10	0.436267073	1.77E-12	0.295473725	3.51E-06	-0.30939101	1.13E-06	-0.107032393	0.099505191	0.053131129	0.414541192	0.028134546	0.66585844	-0.164508774	0.01102524	-0.114083585	0.079008404
ACADM	blue	0.524034431	3.45E-18	-0.524034431	3.45E-18	-0.3470113	3.86E-08	-0.557655817	7.52E-21	-0.687078934	1.38E-34	-0.276949953	1.46E-05	0.245599219	0.000129313	0.050959397	0.433901486	-0.243467634	0.000148538	0.275991189	1.56E-05	0.669324736	2.73E-32	0.575117432	2.35E-22	0.24237687	0.00015938	0.175150236	0.006752058	0.195900421	0.002399285	0.194708418	0.002553509	-0.074514665	0.252169107	0.171863554	0.007878729
KLHL28	blue	0.534325962	5.68E-19	-0.534325962	5.68E-19	-0.340261413	7.32E-08	-0.469499216	1.89E-14	-0.345614244	4.41E-08	-0.004655018	0.943050425	0.378359207	1.62E-09	0.132220237	0.041548783	0.106000165	0.102831174	0.49977387	1.92E-16	0.657326722	7.96E-31	0.561615555	3.49E-21	-0.073746845	0.257103033	-0.090002161	0.166362773	-0.067803255	0.297546222	0.264805412	3.51E-05	-0.144389252	0.025914769	0.156399894	0.01573533
HAT1	blue	0.486510489	1.52E-15	-0.486510489	1.52E-15	0.062712658	0.335377572	-0.323567407	3.34E-07	-0.388344544	5.48E-10	0.019375828	0.766184125	0.536907438	3.58E-19	0.147133283	0.023190539	0.036839991	0.571706856	0.435213305	2.03E-12	0.666855528	5.54E-32	0.743123793	4.64E-43	-0.017946329	0.782988185	0.00319402	0.960906834	0.099019122	0.12768466	0.010399419	0.873200843	-0.413002134	3.21E-11	0.0792024	0.223469007
STAG1	blue	0.664088739	1.21E-31	-0.664088739	1.21E-31	-0.35139083	2.53E-08	-0.596089142	2.75E-24	-0.549012533	3.88E-20	-0.098973998	0.127859205	0.562077851	3.19E-21	0.168321161	0.009277656	0.158502806	0.014369848	0.579069382	1.04E-22	0.833434701	1.01E-62	0.796133416	2.13E-53	-0.005485282	0.932914978	0.000226103	0.997231525	0.110027703	0.090334871	0.152030164	0.018939667	-0.2352691	0.000250272	0.182722504	0.004685281
BAZ2B	blue	0.527269328	1.97E-18	-0.527269328	1.97E-18	-0.335372706	1.15E-07	-0.433345039	2.58E-12	-0.32587432	2.72E-07	-0.117414025	0.070591276	0.356124493	1.59E-08	0.193339922	0.002741638	0.097490091	0.13370249	0.630631887	8.53E-28	0.788405738	1.04E-51	0.70864297	1.31E-37	-0.195500717	0.002450029	0.01551757	0.811766783	-0.026700056	0.681943244	0.142127878	0.02836225	-0.197601478	0.002193848	0.097959471	0.131832393
SMAD5	blue	0.441212707	9.29E-13	-0.441212707	9.29E-13	-0.473583403	1.04E-14	-0.357488211	1.39E-08	-0.168447595	0.009224166	-0.153500128	0.017803586	0.217627653	0.000723999	0.016353994	0.801825229	0.129933898	0.04523465	0.407152679	6.43E-11	0.417313943	1.91E-11	0.383902884	8.91E-10	-0.139893785	0.030971882	-0.148537204	0.021894912	-0.099069346	0.127490603	0.58658092	2.15E-23	0.138571298	0.032611138	0.287200875	6.71E-06
ATAD2	blue	0.622856258	5.74E-27	-0.622856258	5.74E-27	-0.202133296	0.001722292	-0.326749941	2.52E-07	-0.20029763	0.001900849	-0.0975074	0.133633167	0.449467192	3.09E-13	0.273648373	1.86E-05	0.208874139	0.001190219	0.705158404	4.21E-37	0.868642305	6.21E-74	0.740808329	1.15E-42	-0.33017849	1.85E-07	-0.054354788	0.40385999	0.038859932	0.550793877	0.097271831	0.134578994	-0.470947113	1.53E-14	0.037897407	0.560712405
SSFA2	blue	0.416211353	2.18E-11	-0.416211353	2.18E-11	-0.278347256	1.31E-05	-0.415027858	2.52E-11	-0.092196994	0.156226039	-0.231781085	0.000310773	0.042139444	0.51765752	0.110075412	0.090194467	0.420390875	1.31E-11	0.528617038	1.56E-18	0.478589275	4.99E-15	0.386886664	6.43E-10	-0.340947689	6.86E-08	-0.176792551	0.006244908	-0.03418285	0.599774858	0.156324646	0.015786225	-0.033162894	0.610711069	0.054429535	0.403212878
STYK1	blue	0.45518897	1.42E-13	-0.45518897	1.42E-13	-0.115152918	0.076221674	-0.132824343	0.040618212	0.094453814	0.146295812	-0.029321792	0.65266012	0.185941858	0.003994259	0.205828531	0.001408483	0.142852066	0.027557773	0.632171011	5.81E-28	0.629750638	1.06E-27	0.460195978	7.08E-14	-0.458252859	9.28E-14	-0.100294354	0.122827642	-0.104582589	0.107541268	-0.006638187	0.918859132	-0.411810312	3.70E-11	0.01349417	0.835938534
ANKRA2	blue	0.607798392	1.98E-25	-0.607798392	1.98E-25	-0.234345754	0.000265119	-0.526507232	2.25E-18	-0.514727026	1.68E-17	-0.175339607	0.006691761	0.35108739	2.61E-08	0.161350621	0.012686744	0.020196958	0.756580208	0.511135047	3.04E-17	0.810501796	9.62E-57	0.635939579	2.25E-28	-0.030961699	0.634606636	0.078093005	0.230041803	0.059742752	0.358810616	0.011498126	0.859935411	-0.34820468	3.44E-08	0.1783142	0.00580572
RAB21	blue	0.686271937	1.77E-34	-0.686271937	1.77E-34	-0.289039879	5.82E-06	-0.413663594	2.97E-11	-0.190600988	0.003156427	-0.057410849	0.377908804	0.411907078	3.66E-11	0.232392178	0.000299275	0.340005203	7.50E-08	0.758581795	8.51E-46	0.854029446	6.37E-69	0.713774035	2.28E-38	-0.338684274	8.48E-08	-0.03129823	0.63092792	-0.070800178	0.276653753	0.121628869	0.06100195	-0.375451726	2.20E-09	0.039057605	0.54876758
U2SURP	blue	0.626648314	2.28E-27	-0.626648314	2.28E-27	-0.281452896	1.04E-05	-0.497193526	2.89E-16	-0.488300532	1.15E-15	-0.16359932	0.011482795	0.431353179	3.33E-12	0.243670054	0.000146603	0.123142451	0.05783145	0.565270733	1.70E-21	0.842082711	3.24E-65	0.74232651	6.35E-43	-0.039081258	0.548525365	0.077454345	0.233887028	0.087616258	0.177930785	0.103315354	0.111894057	-0.317174521	5.82E-07	0.065279828	0.315930299
STIL	blue	0.447934877	3.80E-13	-0.447934877	3.80E-13	-0.301266103	2.20E-06	-0.604160016	4.54E-25	-0.211825678	0.001008752	-0.239848464	0.000187423	0.067204685	0.301841392	0.235243267	0.000250677	0.091220029	0.160679072	0.535176591	4.88E-19	0.554251927	1.44E-20	0.544978514	8.22E-20	-0.382096236	1.08E-09	-0.022930814	0.724880879	0.057814793	0.3745567	0.25574579	6.57E-05	0.209635665	0.001140731	0.052822292	0.417262999
C2CD5	blue	0.559793912	4.97E-21	-0.559793912	4.97E-21	-0.201444318	0.001787431	-0.63305134	4.66E-28	-0.471555923	1.40E-14	-0.251050175	9.02E-05	0.301256104	2.21E-06	0.30723337	1.35E-06	0.046008972	0.479921317	0.599357972	1.33E-24	0.808010272	3.83E-56	0.74069421	1.20E-42	-0.134298687	0.038420577	0.158566406	0.014330221	0.07439174	0.252954566	0.131783499	0.042232652	-0.19407114	0.002639607	0.084090479	0.196099069
HNRNPA2B1	blue	0.486828372	1.44E-15	-0.486828372	1.44E-15	-0.142505969	0.027939767	-0.387219427	6.20E-10	-0.44003	1.09E-12	-0.035704799	0.583622137	0.508232137	4.91E-17	0.246268053	0.000123778	0.03302745	0.612169923	0.526176091	2.38E-18	0.780454126	4.83E-50	0.782085568	2.23E-50	-0.053025371	0.41547207	0.121981657	0.060250461	0.096071803	0.139477199	-0.050417744	0.438809823	-0.392861526	3.31E-10	0.006587823	0.91947266
KIF14	blue	0.50742944	5.59E-17	-0.50742944	5.59E-17	-0.174912147	0.006828555	-0.22536248	0.000459019	-0.256396532	6.29E-05	-0.232444934	0.000298301	0.242894	0.000154151	0.128726602	0.047289004	0.155777711	0.016160489	0.488124267	1.18E-15	0.748167021	6.25E-44	0.48658372	1.50E-15	-0.135245563	0.037062814	-0.04779769	0.46299492	0.166162337	0.01023441	0.029422199	0.651548784	-0.501579576	1.44E-16	0.100651905	0.121491895
LOC105376081	blue	0.314149335	7.55E-07	-0.314149335	7.55E-07	-0.350655415	2.72E-08	-0.195343534	0.00247025	-0.010084734	0.877006949	-0.036723504	0.572924233	0.124467215	0.055169321	0.105953158	0.102984706	-0.124695542	0.054720913	0.383903199	8.91E-10	0.409818394	4.69E-11	0.390274589	4.42E-10	-0.290258777	5.30E-06	0.057518659	0.377012359	-0.114303404	0.07842892	-0.002017961	0.975295289	0.048021889	0.460896927	-0.018652944	0.774668662
ZNF227	blue	0.569943121	6.70E-22	-0.569943121	6.70E-22	-0.120954439	0.062460054	-0.235616663	0.000244887	-0.293357636	4.15E-06	-0.039473403	0.544517313	0.482479477	2.79E-15	0.219274139	0.000657923	0.199437058	0.00199024	0.590754116	8.78E-24	0.832405013	1.96E-62	0.633879419	3.78E-28	-0.09690625	0.136056998	-0.031465856	0.629098933	-0.02954442	0.65019704	-0.035311148	0.587780684	-0.643657379	3.09E-29	0.145225267	0.025057063
RRP15	blue	0.640124496	7.72E-29	-0.640124496	7.72E-29	-0.240854356	0.000175756	-0.512304964	2.51E-17	-0.372868997	2.89E-09	-0.211420355	0.001032066	0.24606109	0.000125466	0.149484205	0.021056728	0.188752354	0.003467681	0.622338106	6.50E-27	0.836873668	1.07E-63	0.646742383	1.38E-29	-0.197495129	0.002206206	-0.067137077	0.302329092	0.076201046	0.2415639	0.079842314	0.219739	-0.31098068	9.87E-07	0.071385375	0.272693055
SYTL2	blue	0.407283544	6.33E-11	-0.407283544	6.33E-11	-0.327584606	2.33E-07	-0.170287667	0.008476052	-0.307309167	1.34E-06	-0.227742905	0.000397704	0.187253838	0.003740069	0.29767899	2.95E-06	0.078424124	0.228065895	0.310562939	1.02E-06	0.579458538	9.59E-23	0.381242271	1.19E-09	0.0207394	0.750256151	0.298327527	2.80E-06	0.140970121	0.029690112	0.165993706	0.010312695	-0.387271722	6.16E-10	0.035013637	0.590932605
EZH2	blue	0.538451766	2.71E-19	-0.538451766	2.71E-19	-0.333506728	1.37E-07	-0.404278717	9.00E-11	-0.132069169	0.041784271	-0.293975785	3.96E-06	0.147298443	0.023034763	0.297198691	3.06E-06	0.338538687	8.60E-08	0.713650872	2.38E-38	0.758210378	9.95E-46	0.578172546	1.25E-22	-0.389729105	4.70E-10	-0.069820004	0.283374615	-0.088437993	0.173881275	0.145329645	0.024951711	-0.243660627	0.000146693	0.141027747	0.029622784
FLVCR1	blue	0.601485361	8.29E-25	-0.601485361	8.29E-25	-0.231953002	0.000307497	-0.418755053	1.60E-11	-0.356485308	1.54E-08	-0.314168181	7.53E-07	0.154277279	0.017227286	0.216825938	0.000758344	0.197691259	0.002183464	0.586085876	2.39E-23	0.823450011	5.18E-60	0.525477446	2.69E-18	-0.151237746	0.019577841	0.033575914	0.60627198	0.063053541	0.332752045	0.06977712	0.283671151	-0.466064457	3.09E-14	0.043703804	0.50222025
C3orf38	blue	0.681357685	7.89E-34	-0.681357685	7.89E-34	-0.474404626	9.26E-15	-0.514192809	1.83E-17	-0.499408287	2.04E-16	-0.228368097	0.000382911	0.299489439	2.55E-06	0.193024459	0.002786752	0.104289519	0.108535891	0.507311779	5.70E-17	0.807144772	6.16E-56	0.634571552	3.18E-28	0.006237462	0.923742016	0.130508177	0.044284	0.130827237	0.043763114	0.202582924	0.00168096	-0.24730125	0.000115662	0.165657636	0.010470293
CWC22	blue	0.406553552	6.90E-11	-0.406553552	6.90E-11	-0.001869952	0.977106761	-0.513596799	2.02E-17	-0.254355265	7.22E-05	-0.187517637	0.00369076	0.149151689	0.021347816	0.194828349	0.002537594	0.07026612	0.280302175	0.530057495	1.21E-18	0.588594233	1.40E-23	0.609527852	1.33E-25	-0.253698205	7.55E-05	-0.026697137	0.681976117	-0.008858601	0.891863189	0.217644804	0.00072328	-0.011970802	0.85424031	0.096587405	0.137356194
KIF15	blue	0.527664713	1.84E-18	-0.527664713	1.84E-18	-0.294622019	3.76E-06	-0.331489476	1.64E-07	-0.174541839	0.006949073	-0.194677728	0.002557596	0.30854101	1.21E-06	0.200308704	0.001899723	0.262568308	4.10E-05	0.634665717	3.10E-28	0.741129399	1.01E-42	0.573314798	3.39E-22	-0.281432747	1.04E-05	-0.090809401	0.162578917	0.007874467	0.903814868	0.126090599	0.052046322	-0.342494352	5.93E-08	0.13626813	0.035642331
AKAP7	blue	0.519309767	7.75E-18	-0.519309767	7.75E-18	-0.387616903	5.93E-10	-0.360816578	9.96E-09	-0.347512966	3.68E-08	-0.297973149	2.88E-06	0.130289921	0.044643305	0.291472398	4.82E-06	0.120743581	0.062921759	0.479524848	4.34E-15	0.725493009	3.61E-40	0.481893283	3.05E-15	-0.107092307	0.09931479	0.295271073	3.57E-06	0.109914561	0.090668531	0.059237659	0.362895296	-0.280654087	1.10E-05	0.096013229	0.139719729
SMURF2	blue	0.559847306	4.92E-21	-0.559847306	4.92E-21	-0.274734757	1.71E-05	-0.407978703	5.83E-11	-0.495745166	3.63E-16	-0.484934005	1.93E-15	0.128914464	0.046964304	0.163731642	0.011415198	-0.017502658	0.788224554	0.436375797	1.75E-12	0.777756932	1.71E-49	0.521824573	5.05E-18	0.014127453	0.828355562	0.142392033	0.028066509	0.188914284	0.003439347	0.375334301	2.23E-09	-0.395506798	2.46E-10	0.091306353	0.16028181
C4orf46	blue	0.530920594	1.04E-18	-0.530920594	1.04E-18	-0.247113657	0.000117097	-0.159666247	0.013659941	-0.259959784	4.92E-05	0.09422171	0.147294393	0.541055179	1.69E-19	0.124171816	0.055753964	0.195087434	0.002503521	0.504030786	9.71E-17	0.756330857	2.19E-45	0.592434149	6.10E-24	-0.071960406	0.268838881	-0.008845135	0.892026567	0.032110055	0.622091101	-0.115501545	0.075330547	-0.543696743	1.04E-19	0.039501114	0.544234637
CEP192	blue	0.63109717	7.59E-28	-0.63109717	7.59E-28	-0.256682529	6.17E-05	-0.658964319	5.07E-31	-0.52959571	1.31E-18	-0.175664069	0.006589567	0.371212552	3.44E-09	0.239165164	0.000195757	0.034746794	0.593766179	0.481556127	3.21E-15	0.707686146	1.81E-37	0.648343627	9.00E-30	-0.037047005	0.569546443	0.123702892	0.056692565	0.135270194	0.037028044	0.094066521	0.147964947	-0.213878545	0.000897938	0.200127334	0.001918242
DMTF1	blue	0.507596009	5.44E-17	-0.507596009	5.44E-17	-0.252997731	7.92E-05	-0.673636279	7.82E-33	-0.613072524	5.86E-26	-0.23320574	0.000284581	0.317318504	5.75E-07	0.262989305	3.98E-05	0.030424908	0.640493018	0.399518911	1.56E-10	0.643892181	2.91E-29	0.688650604	8.47E-35	0.07071362	0.277242878	0.193994877	0.002650085	0.169972296	0.008600311	0.097581383	0.133337177	-0.008432643	0.897033347	0.103113648	0.112599456
CLHC1	blue	0.452328225	2.10E-13	-0.452328225	2.10E-13	-0.140538146	0.030198985	-0.127381173	0.049669676	-0.110383841	0.089291005	-0.065777683	0.312245792	0.357998336	1.32E-08	0.090722934	0.162981114	0.194797881	0.002541629	0.56255436	2.90E-21	0.698835883	3.35E-36	0.501334979	1.50E-16	-0.233308639	0.000282772	-0.116587687	0.072608311	-0.073421993	0.259210409	-0.059870967	0.357778331	-0.562557753	2.90E-21	0.022869034	0.72559231
TARDBP	blue	0.193409394	0.002731793	-0.193409394	0.002731793	-0.059071746	0.364243326	-0.068488027	0.292682508	-0.119155756	0.066489294	0.117744691	0.069797042	0.185740016	0.004034719	0.11922069	0.066340222	0.06157858	0.34420749	0.170933006	0.008226742	0.268608593	2.67E-05	0.19375307	0.002683558	0.059388526	0.361672219	0.01224939	0.850887217	-0.182191459	0.004809077	0.115461652	0.075432088	-0.165020112	0.010775114	0.152491572	0.018576463
MOXD1	blue	0.098216315	0.130817642	-0.098216315	0.130817642	-0.12173095	0.060783712	-0.060459055	0.353067339	-0.106275371	0.10193595	0.059262082	0.362697128	0.207163326	0.001308667	0.097701055	0.132859461	-0.085050032	0.191025839	0.182444538	0.004749717	0.255524175	6.67E-05	0.26828423	2.74E-05	-0.052717536	0.418188599	0.160005636	0.013458738	-0.1214085	0.06147527	-0.054058896	0.406427679	-0.186948824	0.003797825	-0.043674306	0.502509084
ITGAV	blue	0.449500378	3.08E-13	-0.449500378	3.08E-13	-0.452806882	1.97E-13	-0.573667663	3.15E-22	-0.530786175	1.06E-18	-0.264743191	3.52E-05	0.168491285	0.009205745	0.226504866	0.000428575	-0.01018658	0.87577482	0.350171677	2.85E-08	0.614543662	4.15E-26	0.573328737	3.38E-22	-0.041506322	0.523973867	0.155189098	0.016571909	0.311420143	9.51E-07	0.206893399	0.001328313	0.070109492	0.281378318	-0.037738919	0.562353783
TTC37	blue	0.568049366	9.79E-22	-0.568049366	9.79E-22	-0.19318317	0.002763972	-0.405397329	7.90E-11	-0.335508157	1.14E-07	-0.083772799	0.197800089	0.5130078	2.23E-17	0.210480295	0.001088057	0.160868915	0.012958637	0.602171883	7.11E-25	0.769271148	8.19E-48	0.728745369	1.10E-40	-0.106734704	0.100455516	-0.018590507	0.775402767	-0.021059633	0.746530492	0.231723812	0.000311871	-0.368665637	4.48E-09	0.172070742	0.00780305
RIOK1	blue	0.477162063	6.17E-15	-0.477162063	6.17E-15	-0.022610568	0.728571219	-0.333758636	1.34E-07	-0.207479519	0.001285992	-0.234686056	0.000259554	0.127968834	0.04861783	0.156265106	0.015826596	0.126924205	0.050500645	0.541339375	1.60E-19	0.679910937	1.22E-33	0.47214973	1.29E-14	-0.225813604	0.000446765	-0.060465345	0.353017163	0.009779515	0.880701272	-0.006041617	0.926129453	-0.428647388	4.69E-12	0.019082679	0.769621543
AHCTF1	blue	0.561573315	3.52E-21	-0.561573315	3.52E-21	-0.074470908	0.252448506	-0.431017203	3.47E-12	-0.329501208	1.97E-07	-0.208244982	0.001232585	0.301439111	2.17E-06	0.17783898	0.005939813	0.114728983	0.077316786	0.647406535	1.15E-29	0.837490807	7.14E-64	0.702658352	9.63E-37	-0.233147487	0.000285611	-0.072548835	0.264933553	0.053819797	0.408509593	0.147418301	0.022922281	-0.404863391	8.40E-11	0.058100358	0.372198012
RFX7	blue	0.600664525	9.97E-25	-0.600664525	9.97E-25	-0.254898236	6.96E-05	-0.345320322	4.54E-08	-0.218382364	0.000692986	0.103614139	0.11085553	0.544881643	8.37E-20	0.223805854	0.000503735	0.197076004	0.002255531	0.674147962	6.73E-33	0.811021805	7.19E-57	0.733487398	1.89E-41	-0.285368215	7.73E-06	-0.062700197	0.3354738	-0.042319134	0.515872003	0.126132829	0.051967086	-0.317545297	5.64E-07	0.079611786	0.221077582
NADK2	blue	0.429192447	4.38E-12	-0.429192447	4.38E-12	-0.139930464	0.030927438	-0.128009125	0.048546398	-0.334234328	1.28E-07	0.218425886	0.000691235	0.607654166	2.05E-25	0.004889863	0.94018256	0.062114688	0.340015142	0.351390291	2.53E-08	0.621168508	8.62E-27	0.550019519	3.21E-20	0.114061483	0.079066861	-0.097019055	0.135599619	0.018274855	0.779117063	-0.078440561	0.227968121	-0.491530149	7.01E-16	0.106318305	0.101796846
SPOCK1	blue	0.284353083	8.35E-06	-0.284353083	8.35E-06	-0.230884528	0.000328388	-0.11370185	0.080022948	-0.046215976	0.477945466	-0.116013485	0.074037314	0.051565892	0.428443168	0.021875058	0.737070406	0.347729485	3.61E-08	0.332844158	1.45E-07	0.356437169	1.54E-08	0.159518054	0.01374862	-0.127070149	0.050234006	-0.232874057	0.000290489	-0.105439505	0.104674175	-0.001908817	0.976631082	-0.248289507	0.000108368	0.162105641	0.012270674
CCNE2	blue	0.577603111	1.41E-22	-0.577603111	1.41E-22	-0.227728596	0.000398049	-0.346982746	3.87E-08	-0.246567043	0.000121376	0.089001094	0.171146082	0.554569577	1.36E-20	0.184162874	0.004363811	0.227008157	0.000415766	0.592042938	6.65E-24	0.770977661	3.81E-48	0.698017888	4.37E-36	-0.210620564	0.001079529	-0.062532405	0.336771247	0.070535647	0.278456861	-0.025746828	0.692712237	-0.360331218	1.05E-08	0.018533313	0.776075389
UBE2Q2	blue	0.520139899	6.73E-18	-0.520139899	6.73E-18	-0.453409369	1.81E-13	-0.486635292	1.49E-15	-0.413565665	3.00E-11	-0.099587058	0.125503519	0.310428492	1.03E-06	0.07020332	0.280733321	0.151331562	0.019501324	0.530636538	1.09E-18	0.716869193	7.79E-39	0.669671389	2.47E-32	-0.104034623	0.109406823	-0.078762406	0.226059676	0.067424518	0.300259195	0.146020635	0.024263841	-0.031801594	0.625442463	0.11508732	0.0763903
C6orf120	blue	0.596384687	2.57E-24	-0.596384687	2.57E-24	-0.197454227	0.002210976	-0.445356418	5.37E-13	-0.448244376	3.65E-13	-0.044650453	0.49299752	0.593166151	5.21E-24	0.162085086	0.01228184	0.08914844	0.170435678	0.598476921	1.62E-24	0.839627704	1.71E-64	0.83285587	1.47E-62	-0.080221672	0.217548822	0.065764815	0.31234067	0.098943443	0.127977501	-0.028300114	0.664011562	-0.416019684	2.23E-11	0.055344121	0.395345089
BORCS7	blue	0.392312124	3.52E-10	-0.392312124	3.52E-10	-0.083666352	0.198372452	-0.186557795	0.003873044	-0.29360871	4.07E-06	-0.081588734	0.209785735	0.30949588	1.12E-06	0.045174675	0.487929354	0.070884316	0.276081909	0.404633147	8.63E-11	0.622466597	6.30E-27	0.506936583	6.06E-17	-0.020861903	0.748830238	-0.008231157	0.899480449	0.004167557	0.949005483	-0.032650485	0.616238203	-0.488300215	1.15E-15	0.072334079	0.266354336
PNN	blue	0.559547024	5.21E-21	-0.559547024	5.21E-21	-0.093900827	0.148683445	-0.36473982	6.70E-09	-0.271959339	2.10E-05	-0.100641281	0.12153142	0.364077226	7.17E-09	0.245136528	0.000133276	0.164644396	0.010958404	0.636990107	1.72E-28	0.815443651	5.83E-58	0.705835399	3.36E-37	-0.205749738	0.001414588	-0.00453702	0.944491665	-0.045011563	0.489503311	0.05322272	0.413735999	-0.423676644	8.73E-12	0.070722274	0.277183942
OFD1	blue	0.45782525	9.85E-14	-0.45782525	9.85E-14	-0.28176857	1.02E-05	-0.51250157	2.43E-17	-0.368166012	4.72E-09	-0.459443694	7.86E-14	0.032504314	0.617818878	0.346932234	3.89E-08	0.105568407	0.104248159	0.484625369	2.02E-15	0.659922171	3.89E-31	0.43814745	1.39E-12	-0.145671199	0.02460963	0.287278685	6.67E-06	0.106841804	0.100112792	0.248125083	0.000109551	-0.217815562	0.00071616	-0.111487066	0.086118533
GPX4	blue	-0.459710724	7.57E-14	0.459710724	7.57E-14	0.334279183	1.27E-07	0.5104747	3.40E-17	0.357303429	1.42E-08	0.081994576	0.207519934	-0.344881493	4.73E-08	-0.192130367	0.002918299	-0.168859088	0.009051962	-0.508965806	4.35E-17	-0.59423153	4.13E-24	-0.586969545	1.98E-23	0.112057353	0.084514431	0.080024906	0.218682873	-0.044626373	0.493231004	-0.104579094	0.107553089	0.107137828	0.099170321	-0.073535816	0.258470671
SLC35A3	blue	0.566175882	1.42E-21	-0.566175882	1.42E-21	-0.28009204	1.15E-05	-0.469068057	2.01E-14	-0.227896396	0.000394024	-0.151214856	0.019596549	0.358885992	1.21E-08	0.171645569	0.007959056	0.154279598	0.017225591	0.730541691	5.67E-41	0.809511566	1.67E-56	0.759029006	7.04E-46	-0.325822431	2.73E-07	-0.058029679	0.372780946	-0.061731087	0.343011573	0.165172982	0.010701316	-0.206612592	0.001349037	0.057252364	0.37922898
TMEM267	blue	0.619584063	1.26E-26	-0.619584063	1.26E-26	-0.132711604	0.040790531	-0.36650943	5.59E-09	-0.410495258	4.33E-11	-0.14723857	0.02309113	0.384460301	8.39E-10	0.201769848	0.001756379	0.151910335	0.019034997	0.513193444	2.16E-17	0.789926005	4.91E-52	0.594011331	4.33E-24	-0.040100313	0.538139963	0.047953978	0.46153186	0.115930199	0.074246469	0.058716317	0.367141595	-0.537146341	3.43E-19	0.087241871	0.179798725
GMCL1	blue	0.595746719	2.96E-24	-0.595746719	2.96E-24	-0.494190762	4.63E-16	-0.321993005	3.83E-07	-0.358203947	1.29E-08	0.004611831	0.943577898	0.537967906	2.96E-19	0.134766437	0.037744691	0.109487654	0.091936381	0.581367484	6.45E-23	0.814177751	1.21E-57	0.707420096	1.98E-37	-0.088619328	0.172996946	-0.027252096	0.675735763	0.033395433	0.608210006	0.038997051	0.549387918	-0.359992855	1.08E-08	0.11374395	0.079910546
LACTB	blue	0.368339288	4.63E-09	-0.368339288	4.63E-09	-0.183989167	0.004401497	-0.118385779	0.068277965	-0.249783822	9.82E-05	0.080923676	0.213537117	0.463265047	4.60E-14	0.161627963	0.012532489	0.075847524	0.243760851	0.321159594	4.12E-07	0.523416563	3.84E-18	0.4860537	1.63E-15	-0.002701731	0.966928457	0.120055661	0.064447592	0.28070272	1.10E-05	0.037043363	0.569584412	-0.418887425	1.58E-11	-0.069990402	0.282198407
IMPA1	blue	0.548999278	3.89E-20	-0.548999278	3.89E-20	-0.354459833	1.87E-08	-0.556258482	9.83E-21	-0.449917579	2.91E-13	-0.089280112	0.169802707	0.415988644	2.24E-11	0.180744191	0.005161524	-0.016174433	0.803956826	0.558664956	6.19E-21	0.767494561	1.80E-47	0.789385491	6.42E-52	-0.138293408	0.032964819	0.101866956	0.117036913	0.087271215	0.179651796	0.115754106	0.074690271	-0.111450127	0.086223272	0.08216746	0.206560103
TOPBP1	blue	0.590336923	9.61E-24	-0.590336923	9.61E-24	-0.235873733	0.000240974	-0.491891922	6.63E-16	-0.422412259	1.02E-11	-0.221738356	0.000569377	0.391134174	4.02E-10	0.234522436	0.000262216	0.105069814	0.105903613	0.643077594	3.59E-29	0.862315594	1.08E-71	0.755624183	2.95E-45	-0.12957609	0.045835557	0.005680909	0.93052837	0.020068309	0.758082467	0.133636959	0.039394194	-0.371539017	3.32E-09	0.151838225	0.019092563
RBM4	blue	0.394350546	2.80E-10	-0.394350546	2.80E-10	-0.53271106	7.58E-19	-0.415996184	2.24E-11	-0.420401529	1.31E-11	-0.336545718	1.03E-07	0.027447534	0.673543349	0.169009271	0.008989826	0.003455483	0.95770952	0.320461336	4.38E-07	0.534548489	5.46E-19	0.370111422	3.86E-09	0.053690095	0.409641585	0.11402215	0.079170977	-0.017639433	0.786609254	0.121876946	0.060472709	0.044362466	0.495793661	0.109441017	0.092075739
MGME1	blue	0.531942416	8.68E-19	-0.531942416	8.68E-19	-0.350911425	2.65E-08	-0.470545634	1.62E-14	-0.263571774	3.82E-05	-0.196811535	0.00228717	0.321320462	4.06E-07	0.305401088	1.57E-06	0.281322109	1.05E-05	0.704371788	5.47E-37	0.798260654	7.08E-54	0.671677208	1.38E-32	-0.334303373	1.27E-07	0.014514498	0.823728832	-0.050245752	0.440374979	0.079480034	0.221845212	-0.276491266	1.51E-05	0.073377831	0.259497814
FMR1	blue	0.616981681	2.34E-26	-0.616981681	2.34E-26	-0.347376924	3.73E-08	-0.605051661	3.71E-25	-0.364153083	7.11E-09	-0.193540389	0.002713315	0.339043215	8.20E-08	0.355943935	1.62E-08	0.250432809	9.40E-05	0.69981161	2.44E-36	0.825145041	1.85E-60	0.756313703	2.21E-45	-0.284312592	8.38E-06	0.085402086	0.189188776	0.013932274	0.830690997	0.182789523	0.004669864	-0.147143717	0.023180671	0.057749174	0.375099986
ZNF117	blue	0.444323012	6.16E-13	-0.444323012	6.16E-13	-0.300369438	2.37E-06	-0.196220258	0.002359371	-0.168745853	0.009099062	-0.005097552	0.937646941	0.365172506	6.41E-09	0.112456359	0.083406457	0.137698381	0.033733121	0.484277093	2.13E-15	0.604389158	4.31E-25	0.555023012	1.25E-20	-0.198037747	0.002143807	-0.019051929	0.769982375	0.085835308	0.186945972	0.012476357	0.848157414	-0.246317971	0.000123374	0.051701156	0.427231257
RBM12B	blue	0.579667728	9.18E-23	-0.579667728	9.18E-23	-0.379548276	1.43E-09	-0.44820666	3.67E-13	-0.507340779	5.68E-17	-0.439498906	1.16E-12	0.114215575	0.07866004	0.152898139	0.018261462	-0.013897563	0.831106481	0.395062403	2.59E-10	0.736578123	5.85E-42	0.448590488	3.48E-13	0.049853737	0.443954254	0.201879439	0.001746036	0.160351083	0.013256621	0.28714656	6.74E-06	-0.26671023	3.06E-05	0.098840067	0.128378355
GOLIM4	blue	-0.325453842	2.82E-07	0.325453842	2.82E-07	0.209477681	0.001150839	0.105613497	0.104099461	0.066170183	0.309360909	-0.035790675	0.582716759	-0.292983569	4.28E-06	-0.13880773	0.032312767	-0.153664002	0.017680687	-0.307492544	1.32E-06	-0.337068303	9.85E-08	-0.323321187	3.41E-07	0.092992322	0.15267012	0.057264459	0.379128132	0.022505116	0.729787768	0.06555072	0.313921988	0.210000603	0.001117691	-0.060452211	0.353121938
ENPP5	blue	0.487932339	1.22E-15	-0.487932339	1.22E-15	-0.188206561	0.003564742	-0.174964995	0.006811509	-0.269050783	2.59E-05	-0.297931318	2.89E-06	0.139301265	0.031697424	0.132991135	0.0403644	0.117535652	0.070298285	0.443668214	6.72E-13	0.695515676	9.75E-36	0.398531802	1.75E-10	-0.038120525	0.558405606	0.096070828	0.139481236	-0.036748872	0.572659007	0.030759314	0.636823301	-0.545822298	7.03E-20	0.062544323	0.336678989
KLHL8	blue	0.537712412	3.10E-19	-0.537712412	3.10E-19	-0.23531004	0.000249632	-0.423092965	9.39E-12	-0.30364444	1.82E-06	-0.272430712	2.03E-05	0.188969598	0.003429717	0.207051506	0.001316773	0.082479987	0.204833129	0.599484543	1.30E-24	0.788573608	9.59E-52	0.576820273	1.65E-22	-0.23038823	0.000338533	0.043899644	0.500304872	0.029339717	0.652461656	0.328868844	2.08E-07	-0.321572289	3.97E-07	0.028449843	0.662343098
EXOC8	blue	0.653296977	2.39E-30	-0.653296977	2.39E-30	-0.388088533	5.63E-10	-0.487678009	1.27E-15	-0.366405669	5.65E-09	-0.24204198	0.000162855	0.233644033	0.000276947	0.168506777	0.009199221	0.20286445	0.001655545	0.642637481	4.03E-29	0.840864916	7.42E-65	0.627775563	1.73E-27	-0.183438124	0.004522994	-0.014758992	0.820809277	0.008479267	0.896467216	0.200488462	0.00188153	-0.287652087	6.48E-06	0.086831284	0.181863885
ZNF320	blue	0.526634887	2.20E-18	-0.526634887	2.20E-18	-0.336051194	1.08E-07	-0.318653594	5.12E-07	-0.303089282	1.90E-06	-0.378254961	1.64E-09	0.045770809	0.482200044	0.222074688	0.000558186	0.032979541	0.612686315	0.470522587	1.63E-14	0.727618365	1.66E-40	0.40113805	1.29E-10	-0.135402316	0.036842004	0.142358037	0.028104421	0.062887616	0.334028373	0.178284663	0.005813974	-0.350266081	2.82E-08	0.035891782	0.581651627
RWDD2B	blue	0.443830466	6.58E-13	-0.443830466	6.58E-13	-0.228704864	0.000375156	-0.327095514	2.44E-07	-0.26303128	3.97E-05	-0.331713368	1.61E-07	0.251976663	8.48E-05	0.181806586	0.004900626	0.121891067	0.060442699	0.502230985	1.30E-16	0.627466254	1.86E-27	0.493360823	5.28E-16	-0.167017557	0.009845421	-0.049986498	0.442740242	0.002053209	0.974863904	0.187799235	0.003638771	-0.357493862	1.39E-08	0.043193177	0.507232423
METTL18	blue	0.487898412	1.23E-15	-0.487898412	1.23E-15	-0.04830783	0.458228855	-0.410091097	4.54E-11	-0.53959539	2.20E-19	-0.28574628	7.51E-06	0.246785191	0.000119651	0.173710543	0.007226559	0.016371237	0.801620609	0.295564558	3.49E-06	0.64788092	1.02E-29	0.46633513	2.97E-14	0.173140446	0.007422527	0.14738872	0.022949998	0.163817537	0.011371507	-0.055931935	0.390337406	-0.347189543	3.80E-08	0.159974547	0.01347706
RSRP1	blue	0.500380782	1.74E-16	-0.500380782	1.74E-16	-0.353288367	2.10E-08	-0.479959851	4.07E-15	-0.549631009	3.46E-20	-0.212099681	0.000993267	0.350086083	2.87E-08	0.196379032	0.002339782	0.021226047	0.744596723	0.354132129	1.94E-08	0.642933637	3.73E-29	0.551895678	2.26E-20	0.126354906	0.051552041	0.148626393	0.02181476	0.099675678	0.125165795	0.298121315	2.84E-06	-0.156000265	0.016007271	0.141541353	0.029028457
EXOSC8	blue	0.48946789	9.64E-16	-0.48946789	9.64E-16	0.170410064	0.008428257	-0.46989185	1.78E-14	-0.452132641	2.15E-13	-0.355588917	1.68E-08	0.135859319	0.036204589	0.249637136	9.91E-05	0.044065746	0.498683354	0.381703485	1.13E-09	0.657136429	8.39E-31	0.4124591	3.43E-11	0.041388479	0.525153846	0.117958427	0.069287553	0.094545201	0.145904054	0.026842625	0.680338031	-0.502616858	1.22E-16	0.138484538	0.032721212
REV3L	blue	0.517043833	1.14E-17	-0.517043833	1.14E-17	-0.249477964	0.000100168	-0.427957466	5.11E-12	-0.222861906	0.000532783	-0.169302473	0.00886961	0.274800407	1.71E-05	0.308911575	1.17E-06	0.372728472	2.94E-09	0.698850241	3.34E-36	0.745712844	1.67E-43	0.626532123	2.35E-27	-0.3089157	1.17E-06	-0.016056989	0.805351803	-0.101365534	0.118859681	0.209901861	0.001123882	-0.332564132	1.49E-07	0.074504231	0.252235712
RRN3	blue	0.609947522	1.21E-25	-0.609947522	1.21E-25	-0.421768833	1.11E-11	-0.543926539	9.98E-20	-0.335582226	1.13E-07	-0.078817788	0.225732418	0.39052804	4.30E-10	0.210862766	0.001064948	0.145651913	0.024628838	0.674723679	5.69E-33	0.802366199	8.14E-55	0.801681221	1.17E-54	-0.289123557	5.78E-06	-0.017368405	0.789810947	0.049752226	0.444883775	0.151240544	0.019575555	-0.098143317	0.13110543	0.0656711	0.313032209
MOB1B	blue	0.500177479	1.80E-16	-0.500177479	1.80E-16	-0.186972633	0.003793288	-0.407847618	5.92E-11	-0.137657944	0.033785881	0.120889073	0.062602884	0.397904065	1.87E-10	0.20250326	0.001688217	0.282946995	9.29E-06	0.666091694	6.88E-32	0.710624496	6.70E-38	0.679876218	1.23E-33	-0.379645868	1.41E-09	-0.092661285	0.154142684	-0.138473858	0.032734784	0.068237517	0.294455612	-0.147051635	0.023267882	0.020064085	0.758131801
MYO5C	blue	0.369247278	4.22E-09	-0.369247278	4.22E-09	-0.30276277	1.95E-06	-0.325603877	2.79E-07	-0.202950439	0.001647852	-0.217004689	0.000750558	0.167902084	0.009456929	0.094877328	0.144487004	0.160261457	0.013308802	0.442280257	8.07E-13	0.486572612	1.50E-15	0.459019885	8.34E-14	-0.146910158	0.023402428	0.000358496	0.995610468	-0.09356179	0.150161855	0.02974902	0.647936763	-0.111626083	0.085725271	0.096169627	0.139072874
PHF20L1	blue	0.584451273	3.37E-23	-0.584451273	3.37E-23	-0.286684084	6.98E-06	-0.455944454	1.28E-13	-0.40870172	5.36E-11	-0.373254122	2.78E-09	0.137567687	0.033903896	0.137612956	0.033844661	0.109669025	0.091396018	0.536574346	3.80E-19	0.793446998	8.38E-53	0.523505623	3.78E-18	-0.061896132	0.341720302	0.012552224	0.847245341	0.080341426	0.216860691	0.09792764	0.131958572	-0.358127154	1.30E-08	0.140186046	0.030619255
OPA1	blue	0.575727751	2.07E-22	-0.575727751	2.07E-22	-0.379607392	1.42E-09	-0.336195858	1.07E-07	-0.154113983	0.017347012	0.023215288	0.721608072	0.48285225	2.64E-15	0.216062695	0.000792431	0.215724748	0.00080797	0.729739432	7.63E-41	0.820898863	2.39E-59	0.731224797	4.40E-41	-0.3486087	3.31E-08	-0.087719307	0.17741917	-0.098410334	0.1300551	0.039124346	0.548084266	-0.29623458	3.31E-06	0.059426611	0.36136387
DEPDC1	blue	0.512924147	2.26E-17	-0.512924147	2.26E-17	-0.31775721	5.54E-07	-0.288374547	6.13E-06	-0.170706317	0.008313564	-0.046255391	0.477569758	0.435673665	1.91E-12	0.159190319	0.013946534	0.244664445	0.000137437	0.553476645	1.67E-20	0.690549497	4.69E-35	0.589734231	1.09E-23	-0.240840315	0.000175914	-0.052188133	0.422884605	0.138697444	0.032451655	0.00831098	0.89851086	-0.286674181	6.99E-06	0.084125053	0.195914582
SNAPC1	blue	0.282979215	9.27E-06	-0.282979215	9.27E-06	0.053191616	0.414009338	-0.213115522	0.000937746	-0.165743904	0.010429636	-0.251394241	8.82E-05	-0.021388523	0.742710244	0.017780995	0.784938394	-0.079630528	0.220968538	0.266865984	3.03E-05	0.379471713	1.44E-09	0.225340044	0.000459636	-0.111591134	0.085824002	-0.08511394	0.190691391	0.146020205	0.024264263	0.461105586	6.23E-14	-0.187390712	0.003714411	0.14574106	0.02454016
DCUN1D4	blue	0.481621483	3.18E-15	-0.481621483	3.18E-15	-0.137251321	0.034320329	-0.236508034	0.000231566	-0.049299475	0.449042972	0.195601519	0.002437141	0.571278372	5.12E-22	0.254428998	7.19E-05	0.273934974	1.82E-05	0.639429631	9.23E-29	0.673123391	9.09E-33	0.590219009	9.86E-24	-0.341481524	6.53E-08	-0.102677996	0.114134883	-0.102476185	0.114851681	-0.079638399	0.220922754	-0.47004872	1.74E-14	0.007160593	0.912498154
COMP	brown	-0.079423164	0.222177143	0.079423164	0.222177143	0.223945986	0.00049955	0.3631132	7.90E-09	0.521372389	5.45E-18	0.160051703	0.01343163	-0.046168297	0.478400175	0.004964401	0.939272478	0.5636805	2.33E-21	0.255822625	6.54E-05	-0.007596044	0.907200203	-0.15855517	0.014337215	-0.389597521	4.77E-10	-0.378799273	1.54E-09	-0.477100795	6.23E-15	-0.129293304	0.046315187	-0.310427058	1.03E-06	0.024083221	0.711654192
CD177	brown	-0.235991695	0.000239198	0.235991695	0.000239198	0.113741781	0.079916334	0.312423085	8.74E-07	0.299936192	2.46E-06	0.308682788	1.20E-06	0.042892388	0.51019706	-0.165549661	0.010521376	-0.101675822	0.117729136	-0.152121673	0.018867148	-0.261876233	4.31E-05	-0.094136299	0.147663158	-0.009634815	0.882453609	0.007685648	0.906110521	-0.187735404	0.003650497	-0.231373008	0.000318679	0.133328656	0.039854868	-0.107989818	0.096497012
FOSL1	brown	-0.254304403	7.25E-05	0.254304403	7.25E-05	0.246665021	0.000120598	0.380243477	1.32E-09	0.32699898	2.46E-07	0.169830295	0.008656787	-0.104623703	0.10740231	-0.122386651	0.059397183	-0.005477521	0.933009665	-0.065991757	0.310670166	-0.195118428	0.002499473	-0.133140817	0.040137761	-0.167803081	0.009499727	-0.187874667	0.003624958	0.108148668	0.096004979	-0.131211955	0.043141882	-0.147427239	0.022913912	-0.281969624	1.00E-05
COL11A1	brown	-0.075087967	0.248528162	0.075087967	0.248528162	0.032177379	0.621360672	0.024872187	0.702648058	0.039022079	0.549131474	-0.223433091	0.000515026	-0.21871052	0.000679887	0.078402013	0.228197464	-0.044023781	0.499092761	0.029263929	0.65330091	0.021047314	0.746673709	-0.100357305	0.122591644	-0.057806435	0.374625872	0.117975437	0.069247137	-0.166965418	0.009868757	0.200264241	0.001904248	-0.079799296	0.21998835	-0.033356228	0.608631356
CD74	brown	-0.378766556	1.55E-09	0.378766556	1.55E-09	0.103262996	0.112076828	0.700419625	2.00E-36	0.239078047	0.000196844	0.261223446	4.51E-05	0.155008398	0.016700033	0.029396409	0.651834159	-0.066305242	0.308372276	-0.313797915	7.78E-07	-0.267113728	2.98E-05	-0.189686232	0.003307134	0.171734194	0.00792631	0.181671918	0.004933028	0.006947438	0.91509295	-0.304774832	1.65E-06	-0.212461166	0.000973172	-0.209565477	0.001145212
YWHAE	brown	-0.26523249	3.40E-05	0.26523249	3.40E-05	0.03524594	0.588470854	0.71267231	3.33E-38	0.427755342	5.25E-12	0.509218996	4.17E-17	0.348734055	3.27E-08	-0.124295123	0.055509298	0.096343352	0.138357042	-0.049015134	0.45166623	-0.149150049	0.02134926	0.012470837	0.848223785	-0.080493819	0.215987254	-0.208786644	0.00119603	-0.177858843	0.005934153	-0.271476898	2.18E-05	-0.19092062	0.003105252	-0.133121355	0.040167169
COL1A1	brown	-0.40331016	1.01E-10	0.40331016	1.01E-10	0.027134386	0.677057548	0.642651762	4.01E-29	0.435404683	1.98E-12	0.246899201	0.000118759	-0.026561263	0.683507311	-0.107368871	0.098439633	0.057079632	0.380671046	-0.204266161	0.001534152	-0.36708349	5.27E-09	-0.283220038	9.10E-06	-0.045864918	0.48129892	-0.078087902	0.230072351	-0.27462249	1.73E-05	-0.035686732	0.583812703	-0.009199673	0.887726627	-0.141114838	0.029521281
ZFP36L2	brown	-0.446096771	4.86E-13	0.446096771	4.86E-13	0.145898673	0.024384051	0.775548893	4.76E-49	0.583474305	4.14E-23	0.394738587	2.68E-10	0.068312498	0.293924146	-0.044959903	0.490002376	0.118694879	0.067555254	-0.125331086	0.053488653	-0.337080995	9.84E-08	-0.278584122	1.29E-05	-0.142600699	0.027834763	-0.166007049	0.010306482	-0.227811597	0.000396053	0.009914586	0.879066078	-0.1613528	0.012685526	-0.165182723	0.010696629
APOD	brown	-0.235936802	0.000240023	0.235936802	0.000240023	0.026117985	0.688511642	0.418728812	1.61E-11	0.448650632	3.45E-13	-0.011384976	0.861299797	-0.136233381	0.035689833	0.175813014	0.006543124	0.380592547	1.27E-09	0.156315885	0.015792159	-0.088059363	0.175738585	-0.138559053	0.032626654	-0.322552339	3.65E-07	-0.034656028	0.594731418	-0.286006804	7.36E-06	-0.113153412	0.081498927	-0.146507976	0.023788578	-0.116797257	0.072092381
JUND	brown	-0.419262201	1.50E-11	0.419262201	1.50E-11	0.315786816	6.56E-07	0.833299872	1.11E-62	0.535926723	4.27E-19	0.574059903	2.91E-22	0.164339818	0.011109006	-0.213874674	0.000898136	0.039911495	0.540056823	-0.228269312	0.000385214	-0.359581325	1.13E-08	-0.284979879	7.96E-06	-0.045863868	0.481308971	-0.227221956	0.000410433	-0.132127232	0.041693628	-0.270225797	2.38E-05	-0.300745164	2.30E-06	-0.219438918	0.000651626
PFN1	brown	-0.422363107	1.03E-11	0.422363107	1.03E-11	0.130135795	0.044898504	0.719528884	3.06E-39	0.624809825	3.57E-27	0.564019536	2.18E-21	0.037169127	0.568273778	-0.165124847	0.010724505	0.061072523	0.348194786	-0.254517843	7.14E-05	-0.481010236	3.48E-15	-0.308743929	1.19E-06	-0.141419422	0.02916862	-0.164145502	0.011206038	-0.15713166	0.015247827	-0.236049909	0.000238326	0.094668655	0.145376097	-0.148037061	0.022349113
TFAP2A	brown	-0.370463023	3.72E-09	0.370463023	3.72E-09	0.136013128	0.035992173	0.68369872	3.88E-34	0.66176009	2.33E-31	0.436865721	1.64E-12	0.151014981	0.019760571	-0.051864323	0.425771987	0.231133893	0.000323397	0.007639579	0.906670748	-0.343346084	5.48E-08	-0.177229413	0.006115873	-0.275976218	1.57E-05	-0.375725061	2.14E-09	-0.314787095	7.15E-07	-0.006577547	0.919597853	-0.079823711	0.219846803	-0.057711674	0.375410687
LENG8	brown	-0.243398098	0.000149208	0.243398098	0.000149208	0.093724288	0.149451881	0.716672456	8.34E-39	0.32371065	3.29E-07	-0.010444422	0.872656765	-0.078585699	0.227106087	-0.084328195	0.194833199	0.08100965	0.213049476	-0.06352009	0.329180061	-0.032071711	0.622507277	-0.15670919	0.015527639	0.010500122	0.871983454	-0.069496795	0.285614685	-0.141846078	0.028680681	-0.207795749	0.001263676	-0.385876036	7.18E-10	-0.122012251	0.060185652
PGLYRP3	brown	-0.299538467	2.54E-06	0.299538467	2.54E-06	0.03724984	0.567433398	0.711641101	4.74E-38	0.568276344	9.35E-22	0.429781601	4.06E-12	0.215012338	0.000841654	-0.201600273	0.001772492	0.111849955	0.085094997	0.035734112	0.583313023	-0.174272403	0.007037951	-0.059884308	0.357671024	-0.245488842	0.000130248	-0.288637759	6.01E-06	-0.26733526	2.93E-05	-0.152771789	0.018358854	-0.16640123	0.010124407	-0.121489143	0.061301711
LCN2	brown	-0.200505099	0.001879854	0.200505099	0.001879854	0.023413206	0.719334056	0.421901835	1.09E-11	0.374019582	2.56E-09	0.1215129	0.061250659	-0.071550299	0.271583819	-0.15037528	0.020293557	-0.100093169	0.123584229	-0.057571647	0.376572239	-0.192059522	0.002928959	-0.101902804	0.11690744	-0.081825036	0.208464315	-0.017961624	0.782807833	-0.177924778	0.0059154	-0.104689162	0.107181366	0.015779981	0.808644491	0.012210394	0.851356415
IGFBP4	brown	-0.430517553	3.70E-12	0.430517553	3.70E-12	0.18644357	0.00389527	0.848556622	3.48E-67	0.379738472	1.40E-09	0.057733149	0.375232742	-0.224015379	0.00049749	-0.199328667	0.002001767	-0.021261083	0.744189799	-0.366593692	5.54E-09	-0.33915541	8.12E-08	-0.45383946	1.71E-13	0.173977594	0.007136359	-0.02072224	0.750455956	-0.108178153	0.095913869	-0.223089154	0.000525652	-0.281920497	1.00E-05	-0.098879165	0.128226633
TPSB2	brown	-0.448532836	3.51E-13	0.448532836	3.51E-13	0.164560881	0.010999519	0.736942526	5.09E-42	0.600860431	9.54E-25	0.234852178	0.000256877	-0.126117533	0.051995774	-0.104913569	0.106426628	0.135531061	0.036661479	-0.205286726	0.001450953	-0.429724084	4.09E-12	-0.391647225	3.80E-10	-0.124316113	0.05546774	0.005463954	0.933175209	-0.121022884	0.062310784	-0.13232855	0.041380629	-0.077931949	0.231007249	-0.16244073	0.012089897
COL6A1	brown	-0.435502496	1.95E-12	0.435502496	1.95E-12	0.304015785	1.76E-06	0.765158223	5.03E-47	0.448168551	3.68E-13	0.472569576	1.21E-14	0.218303161	0.000696182	-0.159171487	0.013957982	0.05885849	0.365980566	-0.276025068	1.56E-05	-0.40520233	8.08E-11	-0.269443702	2.52E-05	0.017474419	0.788558171	-0.218833513	0.000675037	-0.13941635	0.03155538	-0.163838402	0.011360916	-0.227352981	0.000407197	-0.099675513	0.125166422
PTGDS	brown	-0.314358199	7.41E-07	0.314358199	7.41E-07	0.035370417	0.587153695	0.511919682	2.67E-17	0.235263182	0.000250365	-0.06976786	0.283735206	-0.238436172	0.000205029	0.080025989	0.218676622	-0.086016546	0.186013508	-0.292802845	4.34E-06	-0.278559088	1.29E-05	-0.3336946	1.34E-07	0.102653053	0.114223285	0.413864575	2.89E-11	0.053896855	0.407837937	-0.082448494	0.205006681	-0.066845498	0.30443841	-0.25298468	7.92E-05
SOX18	brown	-0.27874128	1.27E-05	0.27874128	1.27E-05	0.193658984	0.002696685	0.788962342	7.91E-52	0.231935787	0.000307824	0.215447437	0.000820931	0.018369562	0.778002103	-0.237017555	0.000224258	-0.10067039	0.121423146	-0.377210059	1.83E-09	-0.222145434	0.000555858	-0.376879108	1.90E-09	0.27582555	1.58E-05	-0.049318199	0.448870524	0.090795666	0.162642757	-0.290359924	5.25E-06	-0.51393922	1.91E-17	-0.102201545	0.115832799
EPS8L2	brown	-0.292417375	4.47E-06	0.292417375	4.47E-06	0.066625615	0.306035474	0.633343725	4.33E-28	0.643160231	3.52E-29	0.652580785	2.90E-30	0.398932741	1.67E-10	-0.096570539	0.137425183	0.166354738	0.010145732	0.044417664	0.495257079	-0.278732559	1.28E-05	-0.009082841	0.889143243	-0.308200991	1.25E-06	-0.286638702	7.01E-06	-0.322850808	3.55E-07	-0.122333518	0.059508558	-0.061497685	0.34484292	-0.10791677	0.096723947
EPHX1	brown	-0.37975675	1.39E-09	0.37975675	1.39E-09	0.125122569	0.053890385	0.773016926	1.52E-48	0.536229278	4.04E-19	0.127002811	0.050356886	-0.178002512	0.005893359	-0.234409477	0.000264069	0.079533033	0.221536192	-0.24596927	0.000126222	-0.38738049	6.09E-10	-0.386740693	6.53E-10	-0.023071433	0.723262466	-0.105280434	0.105201791	-0.17686923	0.006222085	-0.181993484	0.004855975	-0.06564777	0.313204524	-0.041215462	0.526888736
POMZP3	brown	-0.070476695	0.278859774	0.070476695	0.278859774	0.121166445	0.061998645	0.477856204	5.57E-15	0.28397355	8.59E-06	-0.00123838	0.984837737	-0.090432273	0.164338562	-0.140864192	0.029814215	0.116491812	0.07284534	-0.025658893	0.693708837	-0.031532527	0.628372108	-0.196975341	0.002267527	-0.026566143	0.683452289	-0.134593526	0.037993362	-0.148548046	0.021885154	-0.326425808	2.59E-07	-0.318969385	4.99E-07	-0.092613963	0.154354057
PITX1	brown	-0.332804235	1.46E-07	0.332804235	1.46E-07	0.07176184	0.270165556	0.739080217	2.24E-42	0.789302877	6.68E-52	0.199665357	0.001966159	-0.073592926	0.258100055	-0.135566313	0.036612181	0.195354898	0.002468783	0.12619314	0.051854096	-0.200748774	0.001855465	-0.227349822	0.000407274	-0.45045743	2.71E-13	-0.29436712	3.83E-06	-0.338526163	8.61E-08	-0.189839175	0.003281492	-0.226735189	0.000422668	-0.090805193	0.162598474
TPSAB1	brown	-0.452432216	2.07E-13	0.452432216	2.07E-13	0.159204932	0.013937656	0.731876113	3.45E-41	0.567337219	1.13E-21	0.249253085	0.000101673	-0.121640619	0.060976796	-0.117394415	0.070638607	0.103464562	0.111374486	-0.256788528	6.12E-05	-0.455865594	1.29E-13	-0.409993431	4.60E-11	-0.080114487	0.218166057	0.010573042	0.871102118	-0.079163073	0.223699704	-0.140462994	0.030288271	-0.051695529	0.427281631	-0.148967667	0.021510402
IGFBP2	brown	-0.448913449	3.33E-13	0.448913449	3.33E-13	0.174320863	0.007021891	0.854932586	3.24E-69	0.575396203	2.22E-22	0.303769851	1.80E-06	-0.03722909	0.567649384	-0.223398527	0.000516085	0.034732089	0.593922504	-0.22957241	0.000355846	-0.382422327	1.05E-09	-0.308695871	1.20E-06	-0.056543656	0.385166937	-0.202480899	0.001690259	-0.230441294	0.000337435	-0.218993918	0.00066876	-0.136538471	0.035274596	-0.090219308	0.165338507
CARM1	brown	-0.281950081	1.00E-05	0.281950081	1.00E-05	0.374274356	2.50E-09	0.732436291	2.80E-41	0.345595381	4.42E-08	-0.150000358	0.020611691	-0.245229765	0.000132468	-0.113819987	0.079707855	-0.00590891	0.927747589	-0.20156341	0.001776013	-0.164304191	0.01112674	-0.412216753	3.53E-11	0.100686117	0.121364681	-0.065091735	0.317329686	-0.053302352	0.413036692	-0.198329879	0.002110883	-0.602848262	6.11E-25	-0.065275093	0.315965478
H1FX	brown	-0.378255898	1.64E-09	0.378255898	1.64E-09	0.069797975	0.283526917	0.655828033	1.20E-30	0.054322982	0.404135529	-0.009793204	0.880535524	-0.135158518	0.037185913	-0.252057059	8.43E-05	-0.232616836	0.000295149	-0.529586273	1.31E-18	-0.328538011	2.14E-07	-0.456497839	1.18E-13	0.512076238	2.61E-17	0.066439578	0.307391003	0.067709214	0.298218333	-0.177002266	0.006182664	-0.243352707	0.000149647	-0.027907521	0.668394125
CALR	brown	-0.254327022	7.24E-05	0.254327022	7.24E-05	-0.038515971	0.554328426	0.505517213	7.64E-17	0.076703163	0.238467372	-0.36346509	7.63E-09	-0.353073245	2.15E-08	-0.09997488	0.124030756	-0.111128988	0.087138163	-0.348347264	3.40E-08	-0.225951802	0.000443072	-0.366673363	5.50E-09	0.298399313	2.78E-06	0.112555291	0.083133555	0.115349705	0.075717623	-0.037569625	0.564109606	-0.127024414	0.050317437	-0.066093405	0.309923847
PLEC	brown	-0.471950895	1.32E-14	0.471950895	1.32E-14	0.267983148	2.80E-05	0.820241489	3.54E-59	0.659907388	3.90E-31	0.439196056	1.21E-12	0.04950709	0.447132999	-0.124554796	0.054996963	0.166799967	0.009943128	-0.232126793	0.000304219	-0.491123307	7.47E-16	-0.373585785	2.68E-09	-0.12872943	0.047284102	-0.217870533	0.000713881	-0.215475573	0.000819608	-0.099938452	0.12416852	-0.145601777	0.02467883	-0.187022013	0.003783893
TMEM259	brown	-0.346244684	4.16E-08	0.346244684	4.16E-08	0.351635755	2.47E-08	0.708017463	1.62E-37	0.447744974	3.90E-13	0.61393617	4.79E-26	0.315769918	6.57E-07	-0.104936949	0.106348236	0.063788053	0.327139692	-0.235828349	0.00024166	-0.368090467	4.75E-09	-0.240830904	0.00017602	0.034650777	0.59478728	-0.212170462	0.000989302	-0.14703197	0.023286544	-0.185912985	0.004000024	-0.301425289	2.18E-06	-0.066006222	0.31056389
CYP4B1	brown	-0.017086955	0.793139494	0.017086955	0.793139494	-0.00185789	0.97725439	0.249582983	9.95E-05	0.339651243	7.75E-08	0.19895694	0.002041762	0.110748832	0.088231232	0.00516044	0.936879292	0.010649933	0.870172966	0.234081329	0.00026952	0.083946668	0.196867784	0.091057431	0.161429359	-0.327664062	2.32E-07	-0.064228272	0.323805463	-0.22223201	0.000553021	-0.078082217	0.23010638	-0.160589569	0.013118646	-0.043283918	0.506339837
ERBB2	brown	-0.26932701	2.54E-05	0.26932701	2.54E-05	0.219602862	0.000645417	0.669477438	2.61E-32	0.521814675	5.06E-18	0.547316936	5.33E-20	0.348794838	3.25E-08	-0.122312673	0.059552299	0.152953127	0.018219217	-0.028089723	0.666358773	-0.231263255	0.000320836	-0.106112583	0.102464739	-0.161220359	0.012759769	-0.321860289	3.88E-07	-0.243867512	0.000144739	-0.09772511	0.132763595	-0.292874999	4.31E-06	-0.075222144	0.247681331
TRAPPC1	brown	-0.44794918	3.80E-13	0.44794918	3.80E-13	0.111073605	0.087296727	0.849057014	2.43E-67	0.518276076	9.23E-18	0.23553204	0.000246188	-0.117583337	0.070183685	-0.262905337	4.01E-05	-0.012554003	0.847223951	-0.301294032	2.20E-06	-0.390044736	4.54E-10	-0.403680489	9.64E-11	0.010985342	0.86612195	-0.12769265	0.04910983	-0.118606664	0.067760871	-0.248398863	0.000107588	-0.123522684	0.05705673	-0.163158505	0.011710539
UBE2M	brown	-0.310152905	1.06E-06	0.310152905	1.06E-06	0.23509764	0.000252969	0.565433153	1.65E-21	0.46578144	3.22E-14	0.752792225	9.52E-45	0.305772496	1.52E-06	-0.170069069	0.008562011	0.034157684	0.600043633	-0.283098276	9.19E-06	-0.467033699	2.69E-14	-0.196242785	0.002356583	0.000656382	0.991963164	-0.19565451	0.00243039	-0.141101276	0.029537067	-0.272825297	1.97E-05	0.039992769	0.539231318	-0.078827317	0.225676146
RHCG	brown	-0.263587623	3.82E-05	0.263587623	3.82E-05	0.145126035	0.025157575	0.512967011	2.25E-17	0.640980877	6.19E-29	0.133844105	0.039087202	-0.139452647	0.031510693	-0.087022642	0.180899233	0.00563578	0.931078881	0.086842993	0.181804752	-0.187903651	0.003619663	-0.144191978	0.026120801	-0.389321225	4.92E-10	-0.099682601	0.125139442	-0.345148563	4.61E-08	-0.11743211	0.070547647	-0.062962941	0.333448572	-0.106115638	0.102454795
SLC7A11	brown	0.31115923	9.72E-07	-0.31115923	9.72E-07	-0.230538863	0.000335423	-0.468645192	2.14E-14	-0.486497784	1.52E-15	0.007306989	0.91071657	0.321050976	4.16E-07	0.037716637	0.56258473	-0.240689118	0.000177624	0.067457089	0.300025237	0.296822693	3.15E-06	0.473359778	1.08E-14	0.157525267	0.014991112	0.190627353	0.003152177	0.478775236	4.86E-15	0.116954225	0.071707906	0.115307334	0.075825923	-0.019019178	0.770366735
BSG	brown	-0.427676174	5.30E-12	0.427676174	5.30E-12	0.1226502	0.058847288	0.709884621	8.62E-38	0.264671511	3.54E-05	0.461319744	6.05E-14	0.115723745	0.074767007	-0.328449475	2.16E-07	-0.193283533	0.002749653	-0.523478516	3.80E-18	-0.49583266	3.58E-16	-0.396475838	2.21E-10	0.290792485	5.08E-06	-0.052870083	0.416841133	0.061866093	0.341955091	-0.231250525	0.000321088	-0.033336152	0.608847169	-0.043793202	0.501345431
TAGLN	brown	-0.346513879	4.05E-08	0.346513879	4.05E-08	0.335717271	1.12E-07	0.65271569	2.79E-30	0.126424641	0.051422283	0.105308052	0.105110036	-0.130146813	0.04488022	-0.248737838	0.000105203	-0.147983799	0.022397959	-0.523908703	3.53E-18	-0.360302034	1.05E-08	-0.512895717	2.27E-17	0.408740185	5.33E-11	0.020990976	0.747328778	0.088523601	0.173463366	-0.180408348	0.005246555	-0.383861967	8.95E-10	-0.056438793	0.386050304
SPATC1L	brown	-0.274637503	1.73E-05	0.274637503	1.73E-05	0.188158366	0.003573429	0.464875081	3.66E-14	0.05604609	0.389369364	0.129167997	0.046529056	-0.142999918	0.027395955	-0.245625474	0.000129091	-0.175918551	0.006510393	-0.445244382	5.45E-13	-0.297243739	3.05E-06	-0.450422053	2.72E-13	0.379227213	1.48E-09	0.00695605	0.914988089	0.02823662	0.664719576	-0.191084884	0.003079246	-0.19440042	0.002594796	0.127095329	0.050188121
LOXL1	brown	-0.39134115	3.93E-10	0.39134115	3.93E-10	0.321683103	3.94E-07	0.792045719	1.70E-52	0.290859869	5.05E-06	0.109237602	0.092685544	-0.115945021	0.074209211	-0.135362128	0.036898508	-0.071068693	0.274831589	-0.397838561	1.89E-10	-0.309496283	1.12E-06	-0.446561012	4.57E-13	0.233249686	0.000283807	0.103018813	0.112932308	-0.047958932	0.461485529	-0.305094419	1.61E-06	-0.454303338	1.60E-13	-0.121116631	0.062106808
RNF145	brown	-0.431393824	3.31E-12	0.431393824	3.31E-12	0.26749834	2.90E-05	0.598891124	1.48E-24	0.373489811	2.71E-09	0.138293936	0.032964144	-0.180224836	0.005293547	-0.12485303	0.054413388	-0.147637414	0.022717879	-0.307315868	1.34E-06	-0.347105747	3.83E-08	-0.473714293	1.02E-14	0.010360177	0.873675314	-0.076604792	0.239071819	0.029281065	0.65311111	-0.117466336	0.070465139	-0.266220845	3.17E-05	-0.096643063	0.137128721
COL6A2	brown	-0.487053643	1.40E-15	0.487053643	1.40E-15	0.361854787	8.98E-09	0.840278998	1.10E-64	0.474049709	9.75E-15	0.139710014	0.03119538	-0.265176414	3.42E-05	-0.164736464	0.010913237	0.020169729	0.756898092	-0.443299824	7.06E-13	-0.498937593	2.19E-16	-0.585715863	2.58E-23	0.157940574	0.014724352	-0.021352158	0.743132335	-0.14434249	0.02596348	-0.202543962	0.001684506	-0.257495758	5.83E-05	-0.070215786	0.280647704
EMILIN1	brown	-0.398474278	1.76E-10	0.398474278	1.76E-10	0.488156252	1.18E-15	0.801059724	1.63E-54	0.39674175	2.14E-10	0.142375632	0.028084794	-0.169689204	0.008713228	-0.130326327	0.044583203	-0.011084834	0.864920964	-0.36784126	4.88E-09	-0.328149232	2.22E-07	-0.536754543	3.68E-19	0.134544486	0.03806414	-0.015170577	0.815900035	-0.027384068	0.674255002	-0.285174471	7.84E-06	-0.544819119	8.47E-20	-0.13040375	0.044455609
PPDPF	brown	-0.443196682	7.15E-13	0.443196682	7.15E-13	0.108802251	0.094001485	0.816510987	3.15E-58	0.544914711	8.32E-20	0.12016225	0.064209206	-0.17013012	0.008537926	-0.22269526	0.00053807	0.036839771	0.571709152	-0.159364201	0.01384122	-0.302822761	1.94E-06	-0.357045271	1.45E-08	-0.101884433	0.116973779	-0.193889099	0.00266468	-0.232645471	0.000294626	-0.187475199	0.003698652	-0.180942776	0.005111828	-0.099735403	0.124938584
ARHGDIA	brown	-0.487030747	1.40E-15	0.487030747	1.40E-15	0.24578481	0.000127754	0.872593879	2.16E-75	0.517378666	1.07E-17	0.311761071	9.24E-07	0.009551619	0.883461381	-0.223661859	0.000508069	0.011820746	0.85604748	-0.328530932	2.14E-07	-0.456748549	1.14E-13	-0.344901102	4.72E-08	0.036117056	0.579281698	-0.174625466	0.006921692	-0.126465505	0.051346371	-0.200861885	0.001844243	-0.141861129	0.028663597	-0.152568556	0.018516457
LY6E	brown	-0.494444505	4.45E-16	0.494444505	4.45E-16	0.147335891	0.022999569	0.625889386	2.74E-27	0.459571524	7.72E-14	0.412414012	3.44E-11	-0.053008401	0.415621551	0.156002414	0.016005799	-0.138992219	0.032081566	-0.41412708	2.80E-11	-0.551303488	2.52E-20	-0.439348802	1.19E-12	-0.015741992	0.809096317	0.099201015	0.126982938	-0.081284635	0.211495139	-0.140691791	0.030017142	0.130249573	0.044709995	-0.269655337	2.48E-05
SYTL1	brown	-0.28516053	7.85E-06	0.28516053	7.85E-06	-0.057994436	0.37307183	0.743686818	3.72E-43	0.611990201	7.54E-26	0.046356638	0.476605376	-0.175865023	0.006526975	-0.098765418	0.128668419	0.231185087	0.000322382	0.03205042	0.622738411	-0.158969301	0.01408141	-0.294868232	3.69E-06	-0.242007429	0.000163217	-0.216556411	0.000770223	-0.343628537	5.33E-08	-0.132756762	0.040721435	-0.215761886	0.000806249	-0.026952812	0.679098409
TPM4	brown	-0.207121204	0.001311715	0.207121204	0.001311715	-0.083132686	0.201260118	0.497767474	2.64E-16	0.359367474	1.15E-08	0.421229782	1.18E-11	0.309264042	1.14E-06	-0.154568377	0.017015644	0.022945553	0.724711195	-0.006401992	0.921736844	-0.154358086	0.017168307	0.165365087	0.01060921	-0.138572525	0.032609583	-0.119035369	0.066766401	-0.068354742	0.29362501	-0.062172477	0.339565185	0.080192601	0.217716105	-0.184675011	0.004254388
PRSS27	brown	-0.257236829	5.94E-05	0.257236829	5.94E-05	0.16817047	0.009341769	0.549522161	3.53E-20	0.701154341	1.58E-36	0.360378706	1.04E-08	0.021992935	0.735706097	-0.165009744	0.010780136	0.099494486	0.125857058	0.057603566	0.376307264	-0.268430744	2.71E-05	-0.122737867	0.058665302	-0.34070352	7.02E-08	-0.17001742	0.008582433	-0.264835417	3.50E-05	-0.192987544	0.002792075	-0.024078292	0.711710578	-0.048879886	0.452917006
RNF19B	brown	-0.376085851	2.06E-09	0.376085851	2.06E-09	-0.05599935	0.389765543	0.626930864	2.13E-27	0.427778244	5.23E-12	0.530271341	1.17E-18	0.100743604	0.121151148	-0.195754323	0.002417721	-0.087892721	0.176560664	-0.227984681	0.000391921	-0.35771918	1.36E-08	-0.122582893	0.058987322	-0.080692336	0.214853245	-0.125181069	0.053777426	-0.041662024	0.522416864	-0.282809998	9.39E-06	0.177427696	0.006058097	-0.198888581	0.002049196
PLTP	brown	-0.382740717	1.01E-09	0.382740717	1.01E-09	0.217495292	0.000729568	0.65334065	2.36E-30	0.378692412	1.56E-09	0.108070868	0.096245712	-0.221476095	0.000578247	-0.208105864	0.001242137	-0.020182643	0.756747327	-0.383125571	9.69E-10	-0.437216381	1.57E-12	-0.457977888	9.64E-14	0.163248367	0.011663792	0.046518839	0.475062629	-0.048632487	0.455209991	-0.181919387	0.004873633	-0.078425835	0.228055714	-0.069343039	0.286684493
HHLA3	brown	-0.047585433	0.464986021	0.047585433	0.464986021	0.01296897	0.842238861	0.498893923	2.21E-16	0.163280485	0.011647123	0.083395858	0.199832311	-0.004741882	0.941989576	-0.208099382	0.001242584	-0.019463459	0.765157459	-0.12761368	0.049251269	-0.024533267	0.706511879	-0.201844595	0.001749319	0.143216279	0.027160625	-0.156412232	0.015726999	-0.016017607	0.805819722	-0.136290785	0.035611389	-0.38139887	1.17E-09	0.034787834	0.59332998
P4HB	brown	-0.397177721	2.04E-10	0.397177721	2.04E-10	0.123285236	0.057539515	0.689314059	6.89E-35	0.556457971	9.47E-21	0.377435869	1.79E-09	0.014018057	0.829664373	-0.199803502	0.001951718	0.10728125	0.098716237	-0.184044242	0.004389517	-0.389598961	4.77E-10	-0.294260088	3.87E-06	-0.149645488	0.020916782	-0.246436975	0.000122415	-0.210122126	0.001110114	-0.110945359	0.087664793	0.049391166	0.448198879	-0.151190586	0.019616402
KRT78	brown	-0.185629892	0.004056949	0.185629892	0.004056949	-0.165789903	0.010408015	0.180799003	0.005147764	0.564295307	2.06E-21	0.338389178	8.72E-08	0.04633075	0.476851857	-0.096303739	0.138520017	0.184882618	0.004210739	0.2190474	0.000666679	-0.184734346	0.004241871	0.003193492	0.960913293	-0.436942411	1.62E-12	-0.16258324	0.012013727	-0.397531848	1.96E-10	-0.008671858	0.894129264	0.338841054	8.36E-08	0.005462418	0.933193955
ITGB4	brown	-0.543208883	1.14E-19	0.543208883	1.14E-19	0.262460561	4.13E-05	0.692439564	2.59E-35	0.436033564	1.83E-12	0.447495897	4.03E-13	0.111081353	0.087274531	-0.176765866	0.006252868	-0.044947822	0.49011913	-0.390572535	4.28E-10	-0.571735965	4.67E-22	-0.358856209	1.21E-08	0.044680578	0.492705516	-0.214555925	0.000863908	-0.067477751	0.299876886	-0.083531165	0.199101085	-0.000294697	0.996391643	-0.175155157	0.006750485
FUT6	brown	-0.28127982	1.05E-05	0.28127982	1.05E-05	-0.010095691	0.876874378	0.609960533	1.21E-25	0.580720431	7.38E-23	0.598628903	1.57E-24	0.274148906	1.79E-05	-0.251617395	8.69E-05	-0.064691944	0.320317463	-0.085690322	0.187694387	-0.339006112	8.23E-08	-0.102848567	0.113531775	-0.153492183	0.017809564	-0.217675138	0.00072201	-0.251497141	8.76E-05	-0.196878815	0.002279083	0.034137462	0.600259641	-0.027672869	0.671018972
NUMA1	brown	-0.150883228	0.019869341	0.150883228	0.019869341	0.16453599	0.011011799	0.369199834	4.24E-09	0.221749915	0.000568989	-0.037438848	0.56546775	-0.127658329	0.049171258	-0.015486435	0.812137442	0.089002917	0.171137279	-0.060099603	0.355942144	-0.072169553	0.267446324	-0.187267815	0.003737442	-0.034853809	0.592629052	-0.078327818	0.228639342	-0.080923731	0.213536806	0.030777588	0.63662301	-0.256420167	6.28E-05	-0.097502854	0.133651372
ZYX	brown	-0.548069719	4.63E-20	0.548069719	4.63E-20	0.173537854	0.007285427	0.845616929	2.80E-66	0.474747612	8.80E-15	0.125940588	0.052328607	-0.256589781	6.20E-05	-0.239232008	0.000194927	-0.17122387	0.008116522	-0.446337668	4.71E-13	-0.513680057	2.00E-17	-0.46315999	4.67E-14	0.070583552	0.278129738	-0.008370833	0.897783944	0.055015859	0.398158324	-0.22164728	0.000572443	-0.018604022	0.775243846	-0.184126345	0.004371712
DUOX2	brown	-0.137561299	0.033912262	0.137561299	0.033912262	0.050478206	0.438260368	0.174915656	0.006827423	0.196695117	0.002301225	0.242006965	0.000163222	0.082391521	0.205320917	0.080287553	0.217170064	-0.232559831	0.000296191	0.009901236	0.879227664	-0.055762796	0.391774393	0.079698364	0.22057418	-0.140020784	0.030818229	0.092636226	0.15425459	-0.18518945	0.004146968	-0.183328015	0.004547631	0.028247579	0.66459736	-0.100432991	0.122308371
PP7080	brown	-0.166001921	0.010308869	0.166001921	0.010308869	0.071552386	0.271569806	0.441337178	9.14E-13	0.361069428	9.71E-09	0.201090835	0.001821717	0.11013003	0.090033949	-0.062330768	0.338334639	-0.11918963	0.066411495	0.084971585	0.191436956	-0.000954446	0.988313831	0.117347166	0.070752757	-0.272729739	1.99E-05	-0.043156297	0.507595437	-0.210531856	0.001084915	-0.161716564	0.012483558	-0.170046527	0.008570918	-0.242402453	0.000159118
ECM1	brown	-0.317406564	5.71E-07	0.317406564	5.71E-07	0.048163628	0.459573306	0.569048276	8.01E-22	0.425288119	7.15E-12	0.099898688	0.124319035	-0.133915923	0.038981239	-0.195332722	0.002471646	-0.237288949	0.000220454	-0.119650607	0.065360124	-0.227509974	0.00040335	-0.15530082	0.016493124	-0.136718203	0.035031899	-0.065667587	0.313058153	-0.096926405	0.135975193	-0.190553422	0.003164108	-0.040478932	0.53430651	-0.137199661	0.034388741
HRAS	brown	-0.357922906	1.33E-08	0.357922906	1.33E-08	0.270452657	2.34E-05	0.805245453	1.73E-55	0.773870948	1.03E-48	0.124019344	0.056057731	-0.243440565	0.000148798	-0.18152373	0.004968905	0.269472889	2.51E-05	0.003911616	0.952133341	-0.270513297	2.33E-05	-0.382064828	1.09E-09	-0.332923037	1.44E-07	-0.349007351	3.19E-08	-0.339210322	8.07E-08	-0.160765839	0.013017478	-0.308376942	1.23E-06	-0.050579319	0.437342357
1-Sep	brown	-0.304688112	1.67E-06	0.304688112	1.67E-06	0.551969057	2.23E-20	0.629019873	1.27E-27	0.086141693	0.18537163	0.057689057	0.375598144	-0.122947234	0.058232563	-0.032273027	0.620323579	-0.186630689	0.003858921	-0.476146376	7.17E-15	-0.246059664	0.000125478	-0.497891439	2.59E-16	0.440352826	1.04E-12	0.265756829	3.28E-05	0.096043901	0.139592691	-0.372610007	2.97E-09	-0.613028941	5.92E-26	-0.065113471	0.317167766
CRIM1	brown	0.313531611	7.95E-07	-0.313531611	7.95E-07	-0.304199683	1.73E-06	-0.545544747	7.41E-20	-0.423427665	9.01E-12	-0.434821439	2.13E-12	0.052164323	0.423096529	0.164407534	0.011075366	-0.026658474	0.682411688	0.293278626	4.18E-06	0.408454109	5.51E-11	0.429209984	4.37E-12	-0.045182245	0.487856373	0.079175319	0.223627851	0.122389279	0.059391679	0.574902113	2.45E-22	0.153597182	0.01773071	-0.024681707	0.704818667
LGALS3BP	brown	-0.418349295	1.68E-11	0.418349295	1.68E-11	0.095069566	0.143671606	0.666475855	6.17E-32	0.603692168	5.05E-25	0.119799689	0.065023038	-0.25500686	6.91E-05	0.184093822	0.004378757	0.025880348	0.691200035	-0.198335354	0.00211027	-0.409887577	4.65E-11	-0.456196423	1.23E-13	-0.220193661	0.000623491	0.045686582	0.483007324	-0.198362733	0.002107209	-0.076620458	0.238975485	-0.038427546	0.55523886	-0.220756079	0.000603261
PLD3	brown	-0.57585763	2.02E-22	0.57585763	2.02E-22	0.213494171	0.000917793	0.765898749	3.64E-47	0.268388497	2.72E-05	0.17497124	0.006809497	-0.204658672	0.00150165	-0.290650081	5.14E-06	-0.27701909	1.45E-05	-0.680320519	1.08E-33	-0.644579535	2.43E-29	-0.607653448	2.05E-25	0.414693492	2.62E-11	0.049850796	0.443981169	0.034331154	0.598192069	-0.141445126	0.029139025	0.028655133	0.660058228	-0.057361365	0.378320705
SPTBN2	brown	-0.375897313	2.10E-09	0.375897313	2.10E-09	0.319208313	4.88E-07	0.86107113	2.89E-71	0.624863481	3.53E-27	0.221275942	0.000585102	-0.035533379	0.585431347	-0.215426029	0.00082194	0.1495707	0.020981575	-0.107341526	0.098525891	-0.288071073	6.28E-06	-0.292833617	4.33E-06	-0.126139888	0.051953849	-0.272190949	2.07E-05	-0.267227442	2.95E-05	-0.261657047	4.37E-05	-0.323393855	3.39E-07	-0.086862932	0.181704083
GPI	brown	-0.399630191	1.54E-10	0.399630191	1.54E-10	0.214677701	0.000857918	0.685198803	2.46E-34	0.494451081	4.45E-16	0.288132075	6.25E-06	-0.147085352	0.023235916	-0.167137459	0.009791945	-0.053387418	0.412290433	-0.352358484	2.30E-08	-0.44601031	4.92E-13	-0.46695772	2.72E-14	0.027433219	0.673703843	-0.073838107	0.256513131	-0.058123809	0.372004719	-0.303832761	1.79E-06	-0.087939256	0.17633081	-0.194800255	0.002541314
ALDOA	brown	-0.429550021	4.18E-12	0.429550021	4.18E-12	0.256547576	6.22E-05	0.670021633	2.23E-32	0.570863614	5.56E-22	0.37924829	1.47E-09	-0.167827114	0.009489322	-0.169458075	0.008806392	-0.098994022	0.127781728	-0.316565057	6.14E-07	-0.489991077	8.89E-16	-0.472888248	1.16E-14	-0.054516106	0.402464182	-0.123372506	0.057361683	-0.153692411	0.017659457	-0.230586322	0.000334449	-0.003564128	0.956381149	-0.109823098	0.09093898
SH3BGRL3	brown	-0.452329161	2.10E-13	0.452329161	2.10E-13	0.162053119	0.012299224	0.86381007	3.27E-72	0.694280764	1.45E-35	0.206783978	0.001336353	-0.160740836	0.013031786	-0.199057438	0.002030878	0.087960535	0.176225782	-0.158549214	0.014340923	-0.371324928	3.40E-09	-0.432341768	2.93E-12	-0.215255428	0.000830017	-0.255020487	6.90E-05	-0.207533216	0.001282178	-0.155998028	0.016008805	-0.203881852	0.001566597	-0.172309147	0.00771677
KRT13	brown	-0.00547696	0.933016512	0.00547696	0.933016512	0.087799092	0.177023804	0.191487289	0.003016369	0.260333673	4.79E-05	0.105868102	0.103262967	0.052448101	0.420574766	-0.074205172	0.254149924	0.025616506	0.694189403	0.061585175	0.344155719	-0.068160178	0.295004456	0.042418312	0.514887867	-0.098050041	0.131473875	-0.037159678	0.568372205	-0.182532832	0.004729164	-0.098189592	0.130922939	-0.059474988	0.360972434	0.096573405	0.137413456
MAP7D1	brown	-0.401507625	1.24E-10	0.401507625	1.24E-10	0.143205542	0.027172263	0.769403214	7.72E-48	0.57994383	8.67E-23	0.269590217	2.49E-05	-0.072942764	0.262340911	-0.196821242	0.002286002	0.032407166	0.618870395	-0.212593486	0.000965911	-0.382537917	1.03E-09	-0.260596117	4.71E-05	-0.138257776	0.033010405	-0.168885145	0.009041154	-0.069859907	0.283098876	-0.240817226	0.000176174	-0.102056697	0.116352884	-0.201184881	0.001812537
AP2M1	brown	-0.3710872	3.48E-09	0.3710872	3.48E-09	0.207743294	0.001267353	0.635442693	2.55E-28	0.365357283	6.29E-09	0.075408817	0.246506523	-0.211477381	0.001028756	-0.060115725	0.355812889	-0.144425202	0.025877374	-0.399576068	1.55E-10	-0.41647173	2.11E-11	-0.509066029	4.28E-17	0.091227766	0.16064344	0.042286166	0.516199354	0.073074795	0.261475856	-0.151610274	0.019275537	-0.217150179	0.000744276	-0.157764268	0.014837085
NUP62	brown	-0.347944268	3.53E-08	0.347944268	3.53E-08	0.396852255	2.11E-10	0.724051218	6.09E-40	0.399076144	1.64E-10	0.564340233	2.04E-21	0.276587633	1.50E-05	-0.091798435	0.158031319	-0.014151234	0.828071114	-0.256857182	6.09E-05	-0.302011032	2.08E-06	-0.281323496	1.05E-05	0.074257397	0.253814925	-0.135422607	0.036813503	-0.089330457	0.169561151	-0.40131705	1.27E-10	-0.475609554	7.76E-15	-0.133043212	0.040285426
NRIP1	brown	0.363500693	7.60E-09	-0.363500693	7.60E-09	-0.33853058	8.60E-08	-0.40214944	1.15E-10	-0.061535103	0.34454891	-0.124315593	0.055468768	0.180512308	0.0052201	0.210796701	0.001068907	0.150252223	0.020397502	0.508869368	4.42E-17	0.41213645	3.56E-11	0.526065038	2.43E-18	-0.40758047	6.11E-11	-0.058006727	0.372970364	0.05886124	0.365958132	0.650783294	4.70E-30	0.173772795	0.007205442	0.022368005	0.731370554
GAS1	brown	-0.292841064	4.33E-06	0.292841064	4.33E-06	0.059468259	0.36102686	0.684043819	3.50E-34	0.424403993	7.98E-12	0.518492407	8.90E-18	0.356290344	1.56E-08	-0.093059073	0.152374479	0.154857974	0.016807347	-0.101211414	0.119424357	-0.233547291	0.000278615	-0.106074963	0.10258725	-0.050776971	0.435551052	-0.16299325	0.011796937	-0.117234472	0.071025624	-0.088905611	0.171607613	-0.237798464	0.000213474	-0.118563228	0.067862302
SLC6A9	brown	-0.349338399	3.09E-08	0.349338399	3.09E-08	0.017181374	0.792022436	0.656276901	1.06E-30	0.539509687	2.24E-19	0.57411975	2.88E-22	0.299769096	2.49E-06	-0.180039953	0.005341272	0.232765077	0.000292455	-0.09160967	0.158891791	-0.345906489	4.29E-08	-0.171073688	0.008173267	-0.132982159	0.040378023	-0.31537272	6.80E-07	-0.236369119	0.000233596	-0.126442142	0.051389761	-0.058454066	0.369289191	-0.075752433	0.244354162
GRINA	brown	-0.489579138	9.48E-16	0.489579138	9.48E-16	0.169107508	0.008949388	0.84198827	3.45E-65	0.477751754	5.65E-15	0.153447207	0.017843433	-0.171945372	0.007848766	-0.194507965	0.002580311	-0.064271835	0.323476713	-0.349045042	3.18E-08	-0.420590867	1.28E-11	-0.430644768	3.64E-12	0.046382721	0.476357105	-0.088090782	0.175583907	-0.087267007	0.179672863	-0.214700931	0.00085678	-0.105400459	0.104803494	-0.110261579	0.08964827
VAMP2	brown	-0.30009559	2.42E-06	0.30009559	2.42E-06	-0.083237732	0.200689316	0.716858295	7.82E-39	0.334051803	1.30E-07	0.089446085	0.169007338	-0.119651233	0.065358706	-0.243002013	0.000153079	0.013477341	0.836140263	-0.245405683	0.000130957	-0.247130042	0.000116971	-0.303931774	1.77E-06	0.114777016	0.077192069	-0.077309364	0.23476619	-0.085114097	0.190690572	-0.16468285	0.010939519	-0.111094383	0.087237213	-0.065033011	0.31776741
TGFB1I1	brown	-0.390796538	4.17E-10	0.390796538	4.17E-10	0.345684958	4.39E-08	0.719173853	3.47E-39	0.261553324	4.40E-05	-0.172864263	0.007519155	-0.452424742	2.07E-13	-0.275472466	1.62E-05	-0.123784789	0.056527705	-0.45627681	1.22E-13	-0.358127811	1.30E-08	-0.610872844	9.77E-26	0.234368341	0.000264746	-0.03553329	0.585432292	0.044419327	0.495240914	-0.129907823	0.045278218	-0.351592619	2.48E-08	-0.097577207	0.133353871
VEGFB	brown	-0.304556699	1.68E-06	0.304556699	1.68E-06	0.267722423	2.85E-05	0.832563631	1.77E-62	0.468408169	2.21E-14	0.126152114	0.051930933	-0.005787258	0.929231191	-0.109109169	0.093072222	0.060774047	0.350560144	-0.14268404	0.027742664	-0.178628957	0.005718404	-0.285383776	7.72E-06	-0.023267466	0.721008329	-0.164131925	0.011212846	-0.190897973	0.003108853	-0.264362323	3.62E-05	-0.509369611	4.07E-17	-0.088242551	0.174838156
LAMB3	brown	-0.327328015	2.39E-07	0.327328015	2.39E-07	0.127455457	0.049535678	0.46492935	3.63E-14	0.398882716	1.68E-10	0.184383688	0.004316325	-0.111520605	0.086023522	-0.026819688	0.680596194	-0.16387228	0.011343739	-0.16031995	0.013274726	-0.289669675	5.54E-06	-0.172470053	0.007659019	-0.209978266	0.001119089	-0.043745533	0.501811803	0.050732493	0.435953793	-0.087863624	0.176704494	-0.02959089	0.649683392	-0.305433968	1.57E-06
CPLX1	brown	-0.156569615	0.015621065	0.156569615	0.015621065	0.170693187	0.008318618	0.602473365	6.64E-25	0.138014943	0.033322501	-0.1559895	0.016014654	-0.189887522	0.003273423	-0.109277652	0.092565227	-0.050607484	0.437086841	-0.193327678	0.002743377	-0.016360959	0.80174258	-0.276701131	1.48E-05	0.18546651	0.004090134	0.002183473	0.973269749	0.028225384	0.664844908	-0.246162647	0.000124635	-0.493816378	4.91E-16	-0.039752125	0.541677365
CPXM1	brown	-0.310543178	1.02E-06	0.310543178	1.02E-06	0.385870282	7.19E-10	0.612242653	7.11E-26	0.298576574	2.74E-06	0.149814878	0.020770669	-0.224614399	0.000480028	-0.084856269	0.192042464	-0.065604883	0.313521448	-0.360528047	1.03E-08	-0.339847393	7.61E-08	-0.491993807	6.52E-16	0.178264314	0.005819668	0.078630791	0.226838739	-0.072815996	0.263173325	-0.317779701	5.53E-07	-0.359359206	1.15E-08	-0.071943523	0.268951509
HSPG2	brown	-0.490095366	8.75E-16	0.490095366	8.75E-16	0.195579299	0.002439976	0.859639102	8.87E-71	0.364155584	7.11E-09	0.241891877	0.000164435	-0.041993031	0.519114725	-0.251009646	9.05E-05	-0.180100102	0.005325703	-0.45135031	2.40E-13	-0.422108693	1.06E-11	-0.445199436	5.48E-13	0.184602408	0.004269748	-0.114387299	0.078208667	0.017305573	0.790553694	-0.199122271	0.002023884	-0.27319686	1.92E-05	-0.151305999	0.019522148
GNB2	brown	-0.545263027	7.80E-20	0.545263027	7.80E-20	0.344907626	4.72E-08	0.855143063	2.76E-69	0.727120584	2.00E-40	0.411830027	3.69E-11	-0.098064362	0.131417254	-0.179664111	0.005439482	0.087232241	0.179846962	-0.292925886	4.30E-06	-0.572813859	3.75E-22	-0.443499879	6.87E-13	-0.144675485	0.025618312	-0.190236049	0.003215789	-0.215312816	0.000827292	-0.211774897	0.001011646	-0.028906066	0.657269619	-0.129418352	0.046102578
CAPNS1	brown	-0.358897927	1.21E-08	0.358897927	1.21E-08	0.11549336	0.075351373	0.607343485	2.20E-25	0.488554043	1.11E-15	0.146850339	0.023459518	-0.160563305	0.013133778	-0.142704151	0.027720478	-0.096226143	0.138839689	-0.263546412	3.83E-05	-0.43201357	3.06E-12	-0.304149576	1.74E-06	-0.04894359	0.452327628	-0.014075163	0.828981096	-0.108035135	0.096356439	-0.133982535	0.038883173	0.067450041	0.300075857	-0.093235721	0.151594198
STRN4	brown	-0.341111519	6.76E-08	0.341111519	6.76E-08	0.122372541	0.059426745	0.844160028	7.73E-66	0.520336422	6.51E-18	0.087109562	0.180462309	-0.107309281	0.09862768	-0.196628397	0.002309315	0.078173027	0.229563176	-0.110519415	0.088896175	-0.198323532	0.002111593	-0.287593607	6.51E-06	-0.095642415	0.141262596	-0.212183191	0.000988591	-0.189343239	0.003365301	-0.201630898	0.001769572	-0.375596419	2.17E-09	-0.122086438	0.060028736
CRIP2	brown	-0.495942162	3.52E-16	0.495942162	3.52E-16	0.235476344	0.000247048	0.697277785	5.54E-36	0.422650579	9.92E-12	0.303801522	1.79E-06	-0.123500111	0.057102481	-0.310900021	9.94E-07	-0.009895327	0.879299193	-0.473136247	1.11E-14	-0.559697871	5.06E-21	-0.558146039	6.84E-21	0.117474113	0.070446403	-0.150794801	0.019942633	-0.024721367	0.704366528	-0.188556482	0.003502235	-0.082763931	0.203273169	-0.132710534	0.04079217
ARPC3	brown	0.23461406	0.000260722	-0.23461406	0.000260722	-0.374406415	2.46E-09	-0.362317835	8.57E-09	-0.028865218	0.657723248	-0.092751592	0.153739907	0.133986256	0.038877702	0.266641611	3.08E-05	0.041080783	0.528241205	0.398523068	1.75E-10	0.271889134	2.11E-05	0.519433998	7.59E-18	-0.359794763	1.10E-08	0.141771544	0.028765415	0.01521903	0.815322575	0.326017845	2.68E-07	0.361748891	9.07E-09	-0.009108619	0.888830645
CYP2S1	brown	-0.451670443	2.29E-13	0.451670443	2.29E-13	0.097213024	0.134815908	0.6523668	3.07E-30	0.513008124	2.23E-17	0.370336449	3.77E-09	-0.000739681	0.990943276	-0.181973101	0.004860827	-0.084589857	0.19344671	-0.252368674	8.26E-05	-0.457601795	1.02E-13	-0.228909774	0.000370509	-0.118932567	0.067003776	-0.11930131	0.06615552	-0.181796116	0.004903139	-0.136792008	0.034932648	0.161467397	0.012621592	-0.277610109	1.39E-05
LSS	brown	-0.283173367	9.13E-06	0.283173367	9.13E-06	0.122782755	0.058572301	0.55012993	3.15E-20	0.465133143	3.53E-14	0.665971203	7.12E-32	0.42445102	7.93E-12	-0.046339652	0.476767094	0.0995395	0.125685052	-0.047798453	0.462987769	-0.244289803	0.000140826	-0.045360865	0.486136017	-0.164332385	0.011112704	-0.218813101	0.00067584	-0.198050234	0.00214239	-0.228418268	0.000381747	-0.112302977	0.083830981	-0.123502287	0.057098069
MFAP2	brown	-0.427240754	5.60E-12	0.427240754	5.60E-12	0.242226451	0.000160932	0.573443952	3.30E-22	0.200413669	0.00188908	0.20818562	0.001236652	-0.13001195	0.04510445	-0.147476804	0.022867552	-0.089197546	0.170199413	-0.51183152	2.71E-17	-0.469519866	1.88E-14	-0.476839635	6.47E-15	0.258747745	5.35E-05	0.075769788	0.244245803	0.057660802	0.375832423	-0.253868376	7.47E-05	-0.09186822	0.157714097	-0.194127735	0.002631855
FGFR3	brown	-0.309798741	1.09E-06	0.309798741	1.09E-06	0.107569795	0.09780768	0.656352956	1.04E-30	0.657670538	7.24E-31	0.657620506	7.34E-31	0.319134566	4.92E-07	-0.189588955	0.003323538	0.057443189	0.377639754	0.023316493	0.720444949	-0.269320239	2.54E-05	-0.054988077	0.39839696	-0.303394923	1.85E-06	-0.334483882	1.25E-07	-0.359711704	1.11E-08	-0.179414593	0.005505575	-0.076843963	0.237604088	-0.131981153	0.04192199
UQCRC1	brown	-0.324400552	3.10E-07	0.324400552	3.10E-07	0.365042615	6.50E-09	0.673965388	7.10E-33	0.563209863	2.55E-21	0.298091919	2.85E-06	-0.101954281	0.116721713	-0.174774061	0.006873276	0.028544925	0.661284447	-0.294602701	3.76E-06	-0.448937999	3.32E-13	-0.379283311	1.47E-09	-0.0477269	0.463658447	-0.121664626	0.060925432	-0.138081231	0.033237058	-0.29012407	5.35E-06	-0.102981808	0.1130624	-0.064655148	0.32059337
FOSL2	brown	-0.309420401	1.13E-06	0.309420401	1.13E-06	0.015768812	0.808777335	0.761810565	2.15E-46	0.73329168	2.03E-41	0.274467676	1.75E-05	-0.048351049	0.457826337	-0.151759334	0.019155717	0.224185049	0.000492485	0.082623034	0.204046163	-0.208141372	0.001239692	-0.22675339	0.000422205	-0.379630284	1.41E-09	-0.264317901	3.63E-05	-0.314026652	7.63E-07	-0.063373282	0.33030138	-0.171490079	0.008016798	-0.097628146	0.133150347
TKT	brown	-0.270635652	2.31E-05	0.270635652	2.31E-05	0.255683505	6.60E-05	0.681253359	8.15E-34	0.467775439	2.42E-14	0.489662953	9.36E-16	0.24462117	0.000137825	-0.234933557	0.000255575	0.0362012	0.578397643	-0.209590062	0.00114364	-0.321775342	3.90E-07	-0.193344068	0.00274105	0.018489484	0.776590962	-0.230624806	0.000333661	-0.098714486	0.128866612	-0.288626836	6.01E-06	-0.238784588	0.000200547	-0.036762395	0.572517655
GIMAP7	brown	0.251318685	8.86E-05	-0.251318685	8.86E-05	0.053978785	0.407124532	-0.483923373	2.25E-15	-0.370210281	3.82E-09	-0.3244615	3.08E-07	-0.072543179	0.264970906	0.352498908	2.27E-08	-0.049248285	0.449514597	0.220288553	0.000620035	0.378910338	1.53E-09	0.315616103	6.66E-07	-0.036526027	0.574990796	0.377604182	1.75E-09	0.073474678	0.258867826	0.271871054	2.11E-05	0.027583495	0.672019767	-0.000292472	0.996418875
FXYD5	brown	-0.580626812	7.52E-23	0.580626812	7.52E-23	0.264875904	3.49E-05	0.707973369	1.64E-37	0.184614176	0.004267255	-0.001919611	0.976498971	-0.387941833	5.73E-10	-0.211863737	0.001006588	-0.391826164	3.72E-10	-0.743796565	3.56E-43	-0.632859517	4.89E-28	-0.695341292	1.03E-35	0.455131928	1.43E-13	0.190774276	0.003128589	0.145095905	0.025188162	-0.189205287	0.003388955	-0.004984505	0.939027027	-0.137957995	0.033396055
STARD10	brown	-0.399947579	1.48E-10	0.399947579	1.48E-10	0.369707089	4.02E-09	0.811841655	4.53E-57	0.79769313	9.50E-54	0.275490166	1.62E-05	-0.141414462	0.029174334	-0.092142125	0.156473645	0.302665931	1.97E-06	-0.059888032	0.357641077	-0.377170827	1.84E-09	-0.410238076	4.46E-11	-0.307220548	1.35E-06	-0.292447645	4.46E-06	-0.351134895	2.59E-08	-0.196627666	0.002309404	-0.251189889	8.94E-05	-0.141579912	0.028984251
PTRF	brown	-0.500656164	1.67E-16	0.500656164	1.67E-16	0.130563548	0.044193233	0.663907629	1.28E-31	0.552122931	2.16E-20	0.626018407	2.66E-27	0.115334631	0.075756137	-0.205777759	0.001412414	0.068570702	0.292098904	-0.315307797	6.84E-07	-0.559962199	4.81E-21	-0.312094535	8.98E-07	-0.075942974	0.243166311	-0.208842886	0.001192292	-0.215277939	0.000828947	-0.222211589	0.000553689	0.18109441	0.005074172	-0.21420264	0.000881505
TNKS1BP1	brown	-0.384292424	8.54E-10	0.384292424	8.54E-10	0.175106632	0.00676601	0.76491018	5.61E-47	0.74416573	3.08E-43	0.219883638	0.000634909	-0.116774902	0.072147272	-0.133120287	0.040168783	0.200056136	0.001925557	0.033832417	0.603522349	-0.260169597	4.85E-05	-0.218943921	0.000670711	-0.393892448	2.95E-10	-0.295637737	3.47E-06	-0.301342541	2.19E-06	-0.116524684	0.072764001	-0.141340792	0.029259315	-0.176521471	0.006326196
LDLR	brown	-0.25290123	7.97E-05	0.25290123	7.97E-05	0.253065295	7.88E-05	0.428294283	4.90E-12	0.450095282	2.84E-13	0.549431166	3.59E-20	0.270327631	2.36E-05	-0.037439204	0.565464051	0.039749372	0.541705379	-0.024352233	0.708578817	-0.270230092	2.38E-05	-0.082980543	0.202088914	-0.225599671	0.000452537	-0.279890568	1.17E-05	-0.069608781	0.284837204	-0.165324532	0.010628596	-0.172900818	0.007506301	-0.184188899	0.00435819
KLK14	brown	-0.300763119	2.30E-06	0.300763119	2.30E-06	0.233781626	0.000274589	0.624027892	4.32E-27	0.578151867	1.26E-22	0.304902781	1.64E-06	0.085828931	0.186978845	-0.136234829	0.035687852	0.486272196	1.57E-15	-0.002588688	0.968311465	-0.277760013	1.37E-05	-0.197319222	0.002226787	-0.224757554	0.00047594	-0.296572636	3.22E-06	-0.291394991	4.85E-06	-0.199003207	0.002036744	-0.153612502	0.017719231	-0.135694686	0.036433129
SRSF6	brown	0.075134667	0.248233194	-0.075134667	0.248233194	0.106729043	0.100473657	-0.241378978	0.000169943	-0.101106164	0.119811178	0.118552854	0.067886543	0.141684117	0.028865077	-0.040710005	0.531973687	-0.097471826	0.133775672	0.077818514	0.231688942	0.053488195	0.411407376	0.149811121	0.0207739	-0.083086631	0.201510741	-0.070773625	0.276834384	0.100495142	0.122076138	0.002608135	0.968073533	0.095585576	0.141500234	0.029210702	0.653890579
APH1A	brown	-0.357294681	1.42E-08	0.357294681	1.42E-08	-0.020754244	0.750083321	0.45383672	1.71E-13	0.414320139	2.74E-11	0.696660586	6.76E-36	0.30434924	1.71E-06	-0.182720234	0.004685804	0.058275535	0.370755632	-0.220433761	0.000614779	-0.45771046	1.00E-13	-0.13568535	0.036446126	-0.077184094	0.2355277	-0.201031561	0.001827524	-0.210345726	0.001096296	-0.116329701	0.073247553	0.300905261	2.27E-06	-0.114985527	0.07665257
PPP1R16A	brown	-0.160353809	0.013255036	0.160353809	0.013255036	0.188082848	0.003587081	0.65403686	1.95E-30	0.660481433	3.33E-31	0.137678644	0.033758864	-0.031893378	0.624444433	-0.082453582	0.204978636	0.323017952	3.50E-07	0.18011279	0.005322424	-0.046420094	0.476001506	-0.151874139	0.019063873	-0.405701989	7.62E-11	-0.301259583	2.21E-06	-0.298257745	2.81E-06	-0.217422176	0.000732662	-0.391475273	3.87E-10	-0.076985593	0.236737925
PRCC	brown	-0.350654874	2.72E-08	0.350654874	2.72E-08	0.330006824	1.88E-07	0.653376838	2.34E-30	0.401396364	1.26E-10	0.634565467	3.18E-28	0.146152222	0.024134715	-0.234739842	0.000258685	-0.054294521	0.40438219	-0.350336705	2.80E-08	-0.423813852	8.59E-12	-0.333040873	1.43E-07	0.094802841	0.144803894	-0.226659912	0.000424591	-0.108646538	0.094475757	-0.356720417	1.50E-08	-0.113953841	0.079352055	-0.023046128	0.723553619
PCOLCE	brown	-0.277359243	1.41E-05	0.277359243	1.41E-05	0.142727372	0.027694881	0.541325777	1.61E-19	0.275983895	1.56E-05	-0.111249857	0.086792911	-0.280351511	1.13E-05	0.02615248	0.688121725	0.057222278	0.379479916	-0.204296227	0.00153164	-0.185338345	0.004116337	-0.414603792	2.65E-11	0.041342674	0.525612858	0.171163831	0.008139165	-0.111695797	0.085528602	-0.19668742	0.002302157	-0.368201727	4.70E-09	-0.142624175	0.027808794
AEBP1	brown	-0.365781863	6.02E-09	0.365781863	6.02E-09	0.308137165	1.25E-06	0.642486746	4.19E-29	0.367314923	5.15E-09	-0.004951083	0.939435079	-0.275255775	1.65E-05	0.032303808	0.619989982	0.072499613	0.265258737	-0.293166209	4.22E-06	-0.329254055	2.01E-07	-0.470185262	1.71E-14	0.09324479	0.151554223	0.090766424	0.162778732	-0.118348895	0.068364625	-0.197592973	0.002194834	-0.337797072	9.21E-08	-0.122224653	0.059737293
PRKCD	brown	-0.320196389	4.48E-07	0.320196389	4.48E-07	0.332664688	1.48E-07	0.654639987	1.66E-30	0.069647957	0.284565547	0.064391003	0.322578516	-0.095175767	0.14322265	-0.277531592	1.39E-05	-0.280542157	1.11E-05	-0.511149029	3.04E-17	-0.299819107	2.48E-06	-0.449403079	3.12E-13	0.494147296	4.67E-16	0.065511707	0.314210707	0.116216618	0.073529193	-0.330825658	1.74E-07	-0.448055654	3.74E-13	-0.015628044	0.810451947
ABHD14B	brown	-0.447527098	4.02E-13	0.447527098	4.02E-13	0.105587697	0.104184523	0.789852425	5.09E-52	0.443337605	7.02E-13	0.00064573	0.992093578	-0.250510513	9.35E-05	-0.208817806	0.001193957	-0.064130931	0.324540822	-0.268242536	2.75E-05	-0.330548155	1.79E-07	-0.413350765	3.08E-11	0.017301767	0.790598691	-0.080192948	0.217714109	-0.173655207	0.007245376	-0.248344375	0.000107976	-0.169434381	0.008815993	-0.068095222	0.295465953
CRABP2	brown	-0.22734417	0.000407414	0.22734417	0.000407414	0.147224068	0.0231048	0.480175925	3.94E-15	0.608824121	1.57E-25	0.253235564	7.79E-05	0.027385297	0.674241216	-0.064879673	0.318912232	0.079097475	0.22408488	0.106377072	0.10160669	-0.202048254	0.001730214	-0.038561408	0.553860876	-0.378875962	1.53E-09	-0.185956533	0.003991331	-0.35726044	1.42E-08	-0.142763628	0.027654955	-0.039952318	0.539642104	-0.114338659	0.078336303
CDC42EP1	brown	-0.537458018	3.24E-19	0.537458018	3.24E-19	0.101300662	0.119097111	0.801108827	1.59E-54	0.612225034	7.14E-26	0.243736026	0.000145978	-0.156074737	0.015956286	-0.20783727	0.001260773	-0.051175739	0.43194989	-0.26772071	2.85E-05	-0.479410884	4.42E-15	-0.343531191	5.38E-08	-0.151394409	0.019450212	-0.143244719	0.027129821	-0.148784307	0.021673467	-0.192414709	0.002875866	0.071015514	0.275191819	-0.205670814	0.001420727
PADI1	brown	-0.259595646	5.05E-05	0.259595646	5.05E-05	-0.133865178	0.039056085	0.265728915	3.28E-05	0.381571723	1.15E-09	0.142549591	0.027891372	-0.133590762	0.039462936	-0.224846439	0.000473418	-0.230384064	0.00033862	-0.03195727	0.623750103	-0.245078808	0.000133779	-0.137037681	0.034603994	-0.210475359	0.001088358	-0.085727196	0.187503834	-0.236946924	0.000225258	-0.131478782	0.04271538	0.3037463	1.80E-06	0.034206268	0.599524798
CLPTM1	brown	-0.498847255	2.23E-16	0.498847255	2.23E-16	0.318671071	5.12E-07	0.773349194	1.30E-48	0.320926172	4.21E-07	0.3991133	1.63E-10	-0.011077098	0.865014343	-0.252147214	8.38E-05	-0.161515645	0.012594759	-0.609198839	1.44E-25	-0.603266943	5.56E-25	-0.543572053	1.07E-19	0.375942902	2.09E-09	-0.056973085	0.381562223	0.003017748	0.96306273	-0.314279085	7.46E-07	-0.11240171	0.083557514	-0.046777286	0.472610081
ASCC2	brown	-0.330024693	1.88E-07	0.330024693	1.88E-07	0.488975279	1.04E-15	0.741950989	7.35E-43	0.525194328	2.83E-18	0.195280264	0.002478432	-0.094264753	0.147108818	-0.223791431	0.000504168	-0.102467237	0.114883543	-0.213513881	0.000916765	-0.300337432	2.38E-06	-0.346781569	3.95E-08	-0.01847938	0.776709824	-0.11625744	0.073427423	-0.169551575	0.008768598	-0.328292576	2.19E-07	-0.397691761	1.92E-10	-0.094927487	0.144273911
ZFP36L1	brown	-0.243337708	0.000149792	0.243337708	0.000149792	0.05005072	0.442153656	0.618160216	1.77E-26	0.512047266	2.62E-17	0.005601725	0.931494319	-0.110950335	0.087650486	-0.052940759	0.416217706	0.14598883	0.024295139	0.099391207	0.126252397	-0.089820604	0.167222792	-0.173726725	0.007221065	-0.290606824	5.15E-06	-0.193031967	0.002785671	-0.20393381	0.001562174	0.067600739	0.298994855	-0.272849507	1.97E-05	-0.075175796	0.247973621
ACTN4	brown	-0.428902619	4.54E-12	0.428902619	4.54E-12	0.270431347	2.35E-05	0.732300718	2.94E-41	0.588792655	1.34E-23	-0.031959378	0.623727199	-0.358760615	1.22E-08	-0.099454638	0.126009476	-0.018657429	0.774615938	-0.196362231	0.002341848	-0.390874148	4.14E-10	-0.445224148	5.46E-13	-0.14424772	0.026062442	-0.084841687	0.192119132	-0.176894561	0.006214561	-0.108992284	0.093425249	-0.15851026	0.014365199	-0.073342179	0.259729991
SLC25A39	brown	-0.500278309	1.77E-16	0.500278309	1.77E-16	0.104229444	0.108740662	0.826258072	9.34E-61	0.640875048	6.36E-29	0.437323833	1.54E-12	-0.093611093	0.149946176	-0.374631347	2.40E-09	0.01765885	0.786380014	-0.333487311	1.37E-07	-0.531220656	9.86E-19	-0.488162149	1.18E-15	-0.059892017	0.357609025	-0.235034053	0.000253976	-0.228284514	0.000384859	-0.264418765	3.60E-05	0.04371721	0.502089017	-0.064249963	0.323641739
MRPS2	brown	-0.32356457	3.34E-07	0.32356457	3.34E-07	0.389499623	4.82E-10	0.687014307	1.41E-34	0.370999072	3.52E-09	0.179430122	0.005501441	-0.096544691	0.13753096	-0.172267363	0.007731831	-0.039311799	0.546167287	-0.319156901	4.91E-07	-0.30506532	1.62E-06	-0.43088862	3.53E-12	0.174460833	0.006975688	-0.032340347	0.619594088	-0.072202999	0.267224087	-0.302588781	1.98E-06	-0.421719653	1.11E-11	-0.064141446	0.324461333
UBE2S	brown	-0.386346552	6.82E-10	0.386346552	6.82E-10	0.345350114	4.53E-08	0.776845236	2.62E-49	0.540159667	1.99E-19	0.474734293	8.82E-15	0.0721779	0.267390849	-0.233048893	0.000287361	-0.124588202	0.054931338	-0.352946422	2.17E-08	-0.427723537	5.27E-12	-0.377743603	1.73E-09	-0.001827203	0.977629984	-0.138054513	0.033271475	-0.014806211	0.820245699	-0.270644236	2.31E-05	-0.252275372	8.31E-05	-0.135194277	0.037135301
CTSD	brown	-0.492717089	5.83E-16	0.492717089	5.83E-16	0.202249097	0.001711559	0.774326969	8.35E-49	0.635372805	2.60E-28	0.400750153	1.35E-10	-0.168477273	0.009211649	-0.229502386	0.00035737	-0.102816985	0.113643254	-0.366970793	5.33E-09	-0.556009414	1.03E-20	-0.504637977	8.80E-17	-0.074290735	0.253601231	-0.099704753	0.125055145	-0.178904738	0.005642869	-0.203585945	0.001592005	0.054758797	0.400369708	-0.099052896	0.127554137
TRIM28	brown	-0.406266354	7.13E-11	0.406266354	7.13E-11	0.092914323	0.153016123	0.886189317	8.23E-81	0.608199712	1.81E-25	0.099164335	0.127124207	-0.279347136	1.22E-05	-0.244581783	0.000138178	0.083694548	0.198220729	-0.238134721	0.000208981	-0.345067797	4.65E-08	-0.493348827	5.29E-16	-0.070419473	0.279251238	-0.159545701	0.013732038	-0.203677952	0.001584065	-0.19438737	0.002596559	-0.20859453	0.001208879	-0.091041921	0.161501065
C2orf54	brown	-0.21526767	0.000829435	0.21526767	0.000829435	0.054376188	0.403674659	0.537385095	3.29E-19	0.580435233	7.83E-23	0.021184182	0.745083049	-0.163516149	0.011525463	-0.124817997	0.054481672	0.103502966	0.11124106	0.149876645	0.02071761	-0.086465048	0.183720677	-0.086917301	0.1814298	-0.37535819	2.23E-09	-0.195903752	0.002398866	-0.317335577	5.74E-07	-0.195516963	0.002447948	-0.10678642	0.100289907	-0.138343713	0.032900553
CENPB	brown	-0.480741536	3.62E-15	0.480741536	3.62E-15	0.18392208	0.00441613	0.829524479	1.22E-61	0.658679392	5.48E-31	0.206036191	0.001392509	-0.141113443	0.029522903	-0.156634267	0.015577728	0.119089195	0.066642388	-0.190489784	0.00317441	-0.408761233	5.32E-11	-0.391523019	3.85E-10	-0.171213888	0.008120283	-0.214146504	0.000884332	-0.229907561	0.000348636	-0.099669397	0.12518971	-0.084928413	0.191663483	-0.17082909	0.008266442
LSP1	brown	-0.513832017	1.95E-17	0.513832017	1.95E-17	0.205752591	0.001414366	0.726302476	2.69E-40	0.164888695	0.010838914	0.031409413	0.62971454	-0.240706231	0.00017743	-0.215259121	0.000829842	-0.259872768	4.95E-05	-0.605306653	3.50E-25	-0.481967564	3.01E-15	-0.540319239	1.93E-19	0.432894384	2.73E-12	0.166083996	0.010270713	0.059545343	0.360403625	-0.269691702	2.47E-05	-0.105403828	0.10479233	-0.058030017	0.372778159
SF3A2	brown	-0.369712216	4.02E-09	0.369712216	4.02E-09	0.060923632	0.349373453	0.793126455	9.86E-53	0.476677733	6.63E-15	-0.0244815	0.707102701	-0.322918701	3.53E-07	-0.215516335	0.000817693	0.027364788	0.674471252	-0.238823101	0.000200058	-0.297250429	3.05E-06	-0.452891511	1.94E-13	-0.007990338	0.902406512	-0.135845777	0.036223341	-0.192184267	0.002910212	-0.155159368	0.01659293	-0.153834808	0.017553377	-0.057242821	0.379308566
PLVAP	brown	-0.506290749	6.73E-17	0.506290749	6.73E-17	0.331633226	1.62E-07	0.766053242	3.40E-47	0.238418534	0.000205258	0.099822176	0.124609046	-0.166025418	0.010297933	-0.187708385	0.003655471	-0.235976126	0.000239431	-0.575918736	1.99E-22	-0.492106491	6.41E-16	-0.473755246	1.02E-14	0.319233272	4.87E-07	-0.002513694	0.969229012	0.134533069	0.038080634	-0.198457247	0.002096673	-0.191286255	0.003047634	-0.129325031	0.046261167
PSMC3	brown	-0.02651615	0.684015977	0.02651615	0.684015977	0.30812742	1.25E-06	0.157730507	0.014858758	0.225991947	0.000442004	0.486731065	1.47E-15	0.302942553	1.92E-06	-0.04137298	0.525309135	0.104416458	0.108104201	-0.117594915	0.070155883	-0.239371145	0.000193209	-0.038676017	0.55268242	0.008789694	0.892699258	-0.114369024	0.078256601	-0.08511003	0.190711843	-0.136416312	0.035440365	-0.062503218	0.336997264	0.021572804	0.740572454
MRPL37	brown	-0.238288877	0.000206951	0.238288877	0.000206951	0.275660134	1.60E-05	0.553075984	1.81E-20	0.710297152	7.49E-38	0.267582618	2.88E-05	-0.130284796	0.044651771	-0.171651069	0.00795702	0.308763798	1.19E-06	-0.019850805	0.760624349	-0.326121398	2.66E-07	-0.371643856	3.29E-09	-0.326659432	2.54E-07	-0.276866038	1.47E-05	-0.248158512	0.000109309	-0.190355817	0.003196197	-0.151528019	0.019341935	-0.08415409	0.195759745
MVB12A	brown	-0.359936264	1.09E-08	0.359936264	1.09E-08	0.09006092	0.166085143	0.796875076	1.45E-53	0.651151913	4.25E-30	0.222818071	0.000534169	-0.236163315	0.000236635	-0.19856812	0.002084374	0.086428755	0.183905435	-0.221631576	0.000572973	-0.397529795	1.96E-10	-0.4996634	1.96E-16	-0.110954531	0.087638426	-0.198699285	0.00206991	-0.279417143	1.21E-05	-0.144851728	0.025437228	-0.125198715	0.053743392	-0.01337691	0.837344302
SERPING1	brown	-0.209046616	0.001178841	0.209046616	0.001178841	0.116184526	0.073609279	0.315731608	6.59E-07	0.111901764	0.08494967	-0.250480013	9.37E-05	-0.339293328	8.01E-08	0.321852518	3.88E-07	0.039504388	0.544201243	-0.266533619	3.10E-05	-0.240508235	0.000179691	-0.321232841	4.09E-07	0.137591157	0.033873175	0.342747329	5.79E-08	0.015680864	0.809823487	-0.019952232	0.759438685	-0.098049231	0.131477076	-0.034399954	0.597458433
SERPINH1	brown	-0.470092223	1.73E-14	0.470092223	1.73E-14	0.233864228	0.000273183	0.618454392	1.65E-26	0.348771143	3.26E-08	0.55122317	2.56E-20	0.089220925	0.17008701	-0.161047806	0.012857072	-0.053097981	0.414832828	-0.424725658	7.67E-12	-0.476904633	6.41E-15	-0.333230007	1.40E-07	0.093738222	0.149391118	-0.010587856	0.870923091	0.012584044	0.846862857	-0.339898885	7.57E-08	-0.006338731	0.922507758	-0.279424039	1.21E-05
OGDH	brown	-0.156260355	0.015829822	0.156260355	0.015829822	0.001528307	0.981288562	0.501626746	1.43E-16	0.30906639	1.16E-06	0.489735389	9.25E-16	0.435365774	1.99E-12	-0.031666887	0.626908438	0.112018327	0.084623431	-0.073013234	0.26187895	-0.19271368	0.002831854	-0.014459045	0.824391344	-0.022346434	0.731619668	-0.145067159	0.025217374	-0.052871429	0.416829256	-0.048968186	0.45210019	-0.189909295	0.003269796	-0.09171979	0.158389389
MAP2K2	brown	-0.482833038	2.65E-15	0.482833038	2.65E-15	0.319770761	4.65E-07	0.845385759	3.29E-66	0.604508691	4.20E-25	0.398800696	1.69E-10	0.040057029	0.538579078	-0.231808971	0.00031024	0.012356407	0.849599869	-0.27844937	1.30E-05	-0.465106804	3.54E-14	-0.348977336	3.20E-08	-0.059023518	0.364635754	-0.190998268	0.003092934	-0.181097017	0.005073527	-0.217238348	0.000740493	-0.162502186	0.012056998	-0.171947692	0.007847918
TAGLN2	brown	-0.428404529	4.83E-12	0.428404529	4.83E-12	0.116590092	0.072602372	0.656896031	8.96E-31	0.689319653	6.88E-35	0.662380601	1.96E-31	0.171033247	0.008188608	-0.15407893	0.017372806	0.17161874	0.007968993	-0.176955347	0.006196541	-0.50627088	6.76E-17	-0.249392727	0.000100736	-0.261835464	4.32E-05	-0.267492005	2.90E-05	-0.215598476	0.000813849	-0.191974991	0.002941726	0.146477345	0.023818211	-0.221874974	0.000564806
ABHD17A	brown	-0.49001946	8.86E-16	0.49001946	8.86E-16	0.185379117	0.004107984	0.780668502	4.37E-50	0.676815591	3.07E-33	0.25304922	7.89E-05	-0.147153841	0.023171099	-0.097366846	0.134196884	0.10184211	0.117126719	-0.236466092	0.000232177	-0.504045097	9.69E-17	-0.481210963	3.38E-15	-0.168899405	0.009035244	-0.167784384	0.009507828	-0.175005001	0.00679863	-0.041660168	0.522435417	-0.066244992	0.308813049	-0.120227393	0.06406387
FLNA	brown	-0.568583813	8.79E-22	0.568583813	8.79E-22	0.176710465	0.006269424	0.856526979	9.71E-70	0.672983275	9.46E-33	0.188379274	0.003533765	-0.306717933	1.41E-06	-0.143489863	0.02686554	0.000466229	0.994291369	-0.318268164	5.30E-07	-0.525883036	2.51E-18	-0.52185908	5.02E-18	-0.150819428	0.019922198	-0.095308707	0.142662163	-0.154143804	0.017325093	-0.09618905	0.138992701	-0.016013485	0.805868697	-0.220420128	0.000615271
MAZ	brown	-0.556608901	9.19E-21	0.556608901	9.19E-21	0.201061384	0.0018246	0.856143103	1.30E-69	0.540022663	2.04E-19	0.30836754	1.23E-06	-0.036183957	0.57857875	-0.216490229	0.000773166	-0.015457174	0.812485826	-0.311185351	9.70E-07	-0.454091765	1.65E-13	-0.361252439	9.54E-09	-0.029723519	0.64821831	-0.190789086	0.00312622	-0.148616266	0.021823847	-0.191669593	0.002988269	-0.075071344	0.248633215	-0.163159953	0.011709784
NFIC	brown	-0.389129242	5.02E-10	0.389129242	5.02E-10	0.260753625	4.66E-05	0.745138473	2.09E-43	0.707449878	1.96E-37	0.092029416	0.156983184	-0.219143547	0.000662953	-0.073649424	0.257733779	0.201368403	0.001794744	0.013691542	0.83357353	-0.296536156	3.23E-06	-0.353160799	2.13E-08	-0.342789058	5.77E-08	-0.306481605	1.44E-06	-0.392172772	3.58E-10	-0.023256668	0.721132434	-0.24120071	0.000171898	-0.047470497	0.466066167
SPI1	brown	-0.449343726	3.15E-13	0.449343726	3.15E-13	0.480206628	3.92E-15	0.806721686	7.76E-56	0.258465332	5.46E-05	0.149350539	0.021173325	-0.069243549	0.287378158	-0.195404799	0.00246235	-0.141554109	0.029013826	-0.444566344	5.96E-13	-0.339577705	7.80E-08	-0.437757255	1.46E-12	0.28562334	7.58E-06	-0.00317702	0.961114733	0.11466356	0.077486915	-0.347489487	3.69E-08	-0.482615265	2.74E-15	-0.141052069	0.029594407
MUC1	brown	-0.287592743	6.51E-06	0.287592743	6.51E-06	-0.065541713	0.313988627	0.358702799	1.23E-08	0.274508414	1.74E-05	0.090181971	0.165514287	-0.097315681	0.134402545	-0.015816292	0.808212692	-0.257598449	5.79E-05	-0.159774964	0.013595204	-0.224763646	0.000475767	-0.089356702	0.169435331	-0.131804609	0.042199381	0.132489508	0.041131803	0.047277585	0.46788222	-0.204692177	0.001498905	0.170396726	0.008433454	-0.177652081	0.005993306
CDC42EP5	brown	-0.304731842	1.66E-06	0.304731842	1.66E-06	0.22286804	0.000532589	0.752303167	1.16E-44	0.391809046	3.73E-10	0.027475496	0.673229892	-0.297527496	2.98E-06	-0.246648321	0.000120731	-0.092024756	0.157004276	-0.313113996	8.24E-07	-0.269747714	2.46E-05	-0.491390614	7.16E-16	0.097358858	0.134228978	-0.057473558	0.377387214	-0.066017111	0.310483902	-0.110889256	0.087826195	-0.362103283	8.75E-09	-0.101848582	0.11710332
SBNO2	brown	-0.517693961	1.02E-17	0.517693961	1.02E-17	0.448226084	3.66E-13	0.860614243	4.14E-71	0.422395211	1.02E-11	0.363042289	7.96E-09	0.014915823	0.818937822	-0.219623046	0.000644656	-0.132728688	0.04076438	-0.465859029	3.18E-14	-0.504354136	9.22E-17	-0.400387068	1.41E-10	0.169479065	0.008797895	-0.109762668	0.09111802	0.058016672	0.372888284	-0.25887705	5.30E-05	-0.262209515	4.21E-05	-0.187929231	0.003614995
PPP2R1A	brown	-0.44050568	1.02E-12	0.44050568	1.02E-12	0.227508903	0.000403376	0.617885178	1.89E-26	0.61836608	1.68E-26	0.540272589	1.95E-19	0.047685504	0.464046706	-0.168546779	0.009182395	0.062995636	0.333197105	-0.302087774	2.06E-06	-0.605363814	3.46E-25	-0.354501051	1.87E-08	-0.088623796	0.172975199	-0.158699747	0.014247452	-0.206782324	0.001336475	-0.197597899	0.002194263	0.178583624	0.005730906	-0.062062729	0.340420032
NUCB1	brown	-0.522277196	4.67E-18	0.522277196	4.67E-18	0.275606208	1.61E-05	0.908323427	2.63E-91	0.530125197	1.20E-18	0.370529708	3.69E-09	-0.061133743	0.347710882	-0.179895636	0.005378793	-0.064302501	0.323245424	-0.425768243	6.73E-12	-0.525535721	2.66E-18	-0.490734671	7.93E-16	0.107380828	0.098401938	-0.102413644	0.115074528	-0.098862586	0.128290951	-0.219919623	0.000633574	-0.178043862	0.005881665	-0.145081505	0.025202792
PLPP2	brown	-0.067496519	0.299742183	0.067496519	0.299742183	0.008819425	0.892338502	0.516531325	1.24E-17	0.417077097	1.96E-11	0.234092845	0.000269326	0.127698871	0.049098701	-0.043998385	0.499340613	0.423097655	9.38E-12	0.110360616	0.089358786	-0.0182936	0.778896352	-0.090537647	0.163845467	-0.178349727	0.005795805	-0.239086343	0.00019674	-0.16880065	0.009076242	-0.218354383	0.000694113	-0.361179536	9.61E-09	-0.058766069	0.366735043
NPDC1	brown	-0.47998062	4.06E-15	0.47998062	4.06E-15	0.400278531	1.43E-10	0.842930297	1.81E-65	0.443229798	7.12E-13	0.007740013	0.905449475	-0.265677419	3.30E-05	-0.148508992	0.021920319	-0.000438544	0.994630348	-0.333633236	1.35E-07	-0.352309618	2.31E-08	-0.510036922	3.65E-17	0.065346957	0.315431848	-0.078443363	0.227951459	-0.092136804	0.156497669	-0.255289589	6.78E-05	-0.419368132	1.49E-11	-0.195657537	0.002430005
IRF2	brown	-0.094681211	0.14532248	0.094681211	0.14532248	-0.008359171	0.897925573	0.513521128	2.05E-17	0.047748895	0.463452228	0.247412707	0.000114817	0.239101464	0.000196551	-0.103416961	0.111540036	-0.15194795	0.019005028	-0.084877731	0.191929664	0.101833043	0.117159502	0.068069478	0.295648984	0.157922873	0.014735637	-0.030389925	0.640877427	0.023553685	0.717721493	-0.248552842	0.000106499	-0.375719886	2.14E-09	-0.043784372	0.501431804
9-Sep	brown	-0.495468123	3.79E-16	0.495468123	3.79E-16	0.432657722	2.82E-12	0.786931209	2.15E-51	0.352926445	2.18E-08	0.029007454	0.656144245	-0.240021946	0.00018536	-0.16162989	0.012531423	-0.184859342	0.004215613	-0.410409392	4.37E-11	-0.376893196	1.89E-09	-0.50002884	1.84E-16	0.139052464	0.032006372	-0.018137361	0.780736535	-0.023190867	0.721888837	-0.200966203	0.001833948	-0.402068894	1.16E-10	-0.14143798	0.02914725
TYMP	brown	-0.450487195	2.69E-13	0.450487195	2.69E-13	0.326393408	2.60E-07	0.758779886	7.82E-46	0.593810578	4.52E-24	0.312947915	8.36E-07	-0.157959422	0.014712345	-0.040053382	0.538616078	0.011563674	0.859145214	-0.320217691	4.47E-07	-0.492740303	5.81E-16	-0.434561577	2.21E-12	-0.100627859	0.121581373	-0.098391395	0.130129384	-0.069448671	0.285949238	-0.145749281	0.024531997	-0.101803487	0.117266423	-0.167722	0.009534904
WBP2	brown	-0.315011835	7.01E-07	0.315011835	7.01E-07	-0.046613212	0.474166267	0.783381793	1.20E-50	0.520335841	6.51E-18	0.173825353	0.007187657	-0.125818087	0.052560066	-0.203508939	0.001598679	0.036327281	0.577074162	-0.172524423	0.007639592	-0.292973339	4.28E-06	-0.305941046	1.50E-06	-0.04707757	0.469769245	-0.156574416	0.015617842	-0.203050194	0.001638969	-0.19091813	0.003105648	-0.123914788	0.056266828	-0.014435895	0.824667965
TRIP6	brown	-0.334765423	1.22E-07	0.334765423	1.22E-07	0.223761219	0.000505075	0.700788632	1.78E-36	0.657173459	8.30E-31	0.0085167	0.896012734	-0.267352768	2.93E-05	-0.083400367	0.19980791	0.13683686	0.03487245	-0.03121386	0.631849347	-0.261190165	4.52E-05	-0.321118289	4.14E-07	-0.305599532	1.55E-06	-0.183487269	0.004512037	-0.265957383	3.23E-05	-0.076266988	0.241155641	-0.244505456	0.000138866	-0.104731153	0.107039818
CLDN7	brown	-0.322895012	3.54E-07	0.322895012	3.54E-07	0.051395284	0.429974571	0.455600209	1.34E-13	0.48914016	1.01E-15	0.433705543	2.46E-12	0.106497426	0.101218124	-0.159210916	0.013934022	-0.270239448	2.38E-05	-0.116716025	0.072292005	-0.318148725	5.35E-07	-0.088860884	0.171824124	-0.208986721	0.001182781	-0.095387796	0.14232951	-0.197202575	0.002240531	-0.208099786	0.001242556	0.108947908	0.093559558	-0.146379916	0.02391268
FUT3	brown	-0.336000622	1.09E-07	0.336000622	1.09E-07	0.159915855	0.013511709	0.655395473	1.35E-30	0.634931222	2.90E-28	0.545517889	7.44E-20	0.179852957	0.005389935	-0.217462043	0.000730974	-0.06329409	0.330907265	-0.09213502	0.156505727	-0.367853364	4.87E-09	-0.13060857	0.044119544	-0.192656591	0.002840211	-0.208691656	0.001202367	-0.249530316	9.98E-05	-0.242873129	0.000154359	-0.001126195	0.986211154	-0.065461926	0.314579359
LARP1	brown	-0.485659576	1.73E-15	0.485659576	1.73E-15	0.239041883	0.000197297	0.660047658	3.76E-31	0.441178989	9.33E-13	0.476075712	7.24E-15	0.058317678	0.370409148	-0.194245156	0.002615839	-0.060175155	0.355336683	-0.344107962	5.09E-08	-0.500983772	1.58E-16	-0.424659899	7.73E-12	0.075747617	0.244384236	-0.177772317	0.005958844	-0.148238674	0.02216505	-0.39172603	3.76E-10	-0.122182446	0.059826167	-0.078373483	0.228367307
SLC25A1	brown	-0.413967188	2.86E-11	0.413967188	2.86E-11	0.252124811	8.39E-05	0.849577679	1.67E-67	0.685692497	2.11E-34	0.136422836	0.035431495	-0.298329021	2.80E-06	-0.288789514	5.94E-06	0.124204749	0.05568853	-0.223485565	0.000513423	-0.405195732	8.08E-11	-0.526436558	2.28E-18	-0.153354459	0.017913456	-0.25642897	6.27E-05	-0.256859275	6.09E-05	-0.249251376	0.000101685	-0.186753275	0.003835275	-0.11934588	0.066053589
LMTK3	brown	-0.384004966	8.81E-10	0.384004966	8.81E-10	0.242917541	0.000153916	0.792487348	1.36E-52	0.382332863	1.06E-09	0.183394204	0.004532807	-0.058331754	0.370293464	-0.246874315	0.000118953	-0.124267814	0.055563407	-0.310852121	9.98E-07	-0.300008057	2.44E-06	-0.329401058	1.98E-07	0.079318772	0.22278736	-0.095042716	0.143785282	-0.064729019	0.320039623	-0.354431358	1.88E-08	-0.274341834	1.77E-05	-0.181317008	0.005019345
MUC20	brown	-0.299113803	2.62E-06	0.299113803	2.62E-06	0.521326634	5.50E-18	0.494536606	4.39E-16	0.439115971	1.22E-12	0.198481844	0.002093939	-0.073040767	0.261698617	-0.20341726	0.001606658	-0.199953648	0.001936131	-0.155253954	0.016526134	-0.2848338	8.05E-06	-0.260616042	4.70E-05	-0.068059443	0.295720354	-0.116255412	0.073432474	-0.212699736	0.000960116	-0.217613355	0.000724599	-0.261210764	4.51E-05	0.05462158	0.401553111
MAP1S	brown	-0.442659767	7.68E-13	0.442659767	7.68E-13	0.644033533	2.80E-29	0.739212872	2.13E-42	0.254280614	7.26E-05	0.050677093	0.436455712	-0.242294186	0.000160231	-0.210449945	0.00108991	-0.173061256	0.007450119	-0.495362298	3.86E-16	-0.397178037	2.04E-10	-0.512704058	2.35E-17	0.282406072	9.68E-06	0.008248239	0.899272943	0.017488429	0.788392644	-0.357139494	1.44E-08	-0.411426327	3.88E-11	-0.144625333	0.025670044
SDC4	brown	-0.233573242	0.000278167	0.233573242	0.000278167	0.239165715	0.00019575	0.209841923	0.001127656	0.352420267	2.29E-08	-0.065657226	0.313134678	-0.37131801	3.40E-09	0.015111767	0.816601066	-0.013230231	0.839103482	-0.091242027	0.160577767	-0.278919605	1.26E-05	-0.231712397	0.000312091	-0.266139192	3.19E-05	-0.074736668	0.250754844	0.047946475	0.461602045	0.036254658	0.57783632	0.083437517	0.19960697	-0.284101039	8.51E-06
SOX9	brown	0.05340416	0.412143653	-0.05340416	0.412143653	0.014385705	0.825267756	0.125960902	0.052290305	0.229486595	0.000357714	-0.169370937	0.008841745	-0.200330552	0.001897503	0.01633137	0.802093725	0.03639411	0.576373226	0.187929019	0.003615034	0.103101853	0.11264081	-0.013655312	0.834007553	-0.309652426	1.10E-06	-0.081068615	0.212715492	0.019597996	0.763582057	0.290327061	5.27E-06	-0.20563127	0.001423812	-0.185112811	0.004162814
PKN1	brown	-0.32663943	2.54E-07	0.32663943	2.54E-07	0.483046761	2.56E-15	0.698736135	3.46E-36	0.143248809	0.027125393	-0.033125976	0.61110856	-0.249881614	9.75E-05	-0.204846978	0.001486282	-0.195599084	0.002437451	-0.526653081	2.19E-18	-0.323498281	3.36E-07	-0.588279281	1.49E-23	0.427670629	5.30E-12	0.061866252	0.341953848	0.077434482	0.234007337	-0.266413007	3.13E-05	-0.514317629	1.79E-17	-0.003540959	0.956664424
MDK	brown	-0.396176986	2.28E-10	0.396176986	2.28E-10	0.41354837	3.01E-11	0.633369992	4.30E-28	0.268198712	2.75E-05	0.285012476	7.94E-06	-0.050735379	0.435927647	-0.105686616	0.103858687	-0.176728977	0.006263887	-0.394441996	2.78E-10	-0.359180918	1.17E-08	-0.443721336	6.67E-13	0.218375064	0.00069328	0.12290594	0.058317705	-0.14956404	0.020987354	-0.282954286	9.29E-06	-0.365844727	5.98E-09	-0.074250351	0.253860099
ADK	brown	0.301382922	2.18E-06	-0.301382922	2.18E-06	-0.521871424	5.01E-18	-0.55191005	2.25E-20	0.035811695	0.582495238	-0.03141508	0.629652723	0.12111948	0.062100618	0.177403888	0.006065009	0.296392875	3.26E-06	0.573064803	3.56E-22	0.310901339	9.94E-07	0.504772038	8.62E-17	-0.564138038	2.13E-21	-0.119931127	0.064727031	-0.136462891	0.035377079	0.293165455	4.22E-06	0.5622747	3.06E-21	-0.009350122	0.885902923
TMEM119	brown	-0.326210044	2.64E-07	0.326210044	2.64E-07	0.220234019	0.000622019	0.535108297	4.94E-19	0.218406344	0.000692021	-0.205243779	0.001454369	-0.38795176	5.72E-10	0.021267438	0.744115994	-0.043454739	0.504661749	-0.291481211	4.81E-06	-0.221317555	0.000583671	-0.446821622	4.41E-13	0.126471621	0.051335018	0.228062677	0.000390073	-0.088609476	0.173044904	-0.104812798	0.106765027	-0.299569619	2.53E-06	-0.101398849	0.118737894
PTPN13	brown	0.324363005	3.11E-07	-0.324363005	3.11E-07	-0.397140442	2.04E-10	-0.49115894	7.43E-16	0.047607662	0.464777278	-0.161673599	0.012507265	0.09367907	0.149649185	0.237790818	0.000213577	0.232996577	0.000288294	0.685820077	2.03E-34	0.469306726	1.94E-14	0.555213197	1.20E-20	-0.581824258	5.86E-23	-0.134017586	0.038831656	-0.250583573	9.31E-05	0.532052725	8.51E-19	0.280607612	1.11E-05	0.087441163	0.178802601
PMS2P2	brown	-0.045551254	0.484305903	0.045551254	0.484305903	-0.124235389	0.055627712	0.528423316	1.61E-18	0.328390773	2.17E-07	0.100813116	0.120893346	0.151715822	0.019190626	-0.004291022	0.947496894	0.042968913	0.509441968	0.11636766	0.073153212	0.091485797	0.159458366	0.019835006	0.760809085	-0.157620494	0.014929574	-0.114939256	0.076772025	-0.126560167	0.051170881	0.148489694	0.021937712	-0.373344948	2.75E-09	-0.090486725	0.164083617
XAB2	brown	-0.296151749	3.33E-06	0.296151749	3.33E-06	0.289469364	5.63E-06	0.821159468	2.05E-59	0.470947724	1.53E-14	0.113199976	0.081372766	-0.101302777	0.119089363	-0.187853141	0.003628895	0.091182706	0.160851064	-0.133868161	0.039051682	-0.166414625	0.01011827	-0.297938624	2.88E-06	-0.054097369	0.406093274	-0.155079292	0.016649663	-0.174878386	0.006839465	-0.291410112	4.84E-06	-0.42290274	9.61E-12	-0.081983272	0.207582805
BTBD2	brown	-0.430047894	3.93E-12	0.430047894	3.93E-12	0.149622869	0.02093636	0.889068414	4.78E-82	0.5997104	1.23E-24	0.229502163	0.000357374	-0.124448085	0.055207029	-0.259346889	5.13E-05	0.065286678	0.315879415	-0.223462369	0.000514131	-0.352491305	2.27E-08	-0.440516085	1.02E-12	-0.069397067	0.286308272	-0.225136268	0.00046528	-0.221341707	0.000582842	-0.171697146	0.007939984	-0.254405145	7.20E-05	-0.102854029	0.113512504
HS3ST6	brown	-0.133403888	0.039742038	0.133403888	0.039742038	0.142218243	0.028260781	0.514004888	1.89E-17	0.616684312	2.51E-26	0.050805282	0.435294818	-0.109457852	0.092025414	-0.043834586	0.500940731	0.554994865	1.25E-20	0.269417625	2.52E-05	-0.012748284	0.844889242	-0.210697414	0.001074882	-0.420298058	1.33E-11	-0.335922788	1.10E-07	-0.391326673	3.93E-10	-0.085276355	0.189843366	-0.404059988	9.23E-11	-0.058455859	0.369274485
SSBP3	brown	-0.432153852	3.00E-12	0.432153852	3.00E-12	0.008116574	0.900872526	0.712260694	3.84E-38	0.431896513	3.10E-12	0.228190331	0.000387065	-0.085902962	0.186597496	-0.203549083	0.001595197	0.026955869	0.679064033	-0.233575909	0.000278121	-0.364242946	7.05E-09	-0.259157293	5.20E-05	0.00322446	0.960534558	-0.132010236	0.041876442	-0.126785545	0.050755067	-0.256323405	6.32E-05	0.042669179	0.512402863	-0.131577362	0.042558706
SPATA20	brown	-0.41895037	1.56E-11	0.41895037	1.56E-11	0.29164684	4.75E-06	0.68381885	3.74E-34	0.290020579	5.40E-06	0.049747894	0.444923471	-0.246925042	0.000118557	-0.167778316	0.009510459	-0.191148535	0.003069222	-0.417688551	1.82E-11	-0.383541993	9.27E-10	-0.443121642	7.22E-13	0.181598782	0.004950705	0.079729429	0.220393749	-0.009745108	0.881117888	-0.328239306	2.20E-07	-0.214566383	0.000863392	-0.069826037	0.283332917
STAG2	brown	0.2990067	2.65E-06	-0.2990067	2.65E-06	-0.305377699	1.57E-06	-0.500296461	1.77E-16	-0.21862851	0.000683139	-0.289002724	5.84E-06	-0.008299747	0.898647296	0.114681005	0.077441522	0.021935715	0.736368256	0.402761337	1.07E-10	0.394528186	2.75E-10	0.387275018	6.16E-10	-0.233507385	0.000279306	-0.029758351	0.647833759	-0.002176171	0.9733591	0.647350506	1.17E-29	0.224199542	0.00049206	0.14532576	0.024955625
ALPL	brown	-0.450585676	2.66E-13	0.450585676	2.66E-13	0.23126239	0.000320854	0.80561863	1.42E-55	0.329752691	1.92E-07	0.418445029	1.66E-11	0.042279178	0.516268752	-0.221656944	0.000572117	-0.147567497	0.02278293	-0.456760742	1.14E-13	-0.412124067	3.57E-11	-0.385034904	7.88E-10	0.220425787	0.000615067	-0.006816792	0.916683787	0.022926578	0.724929654	-0.34041214	7.22E-08	-0.237157346	0.000222291	-0.193451003	0.002725911
MUC4	brown	-0.129381983	0.04616433	0.129381983	0.04616433	0.218819607	0.000675584	0.351646539	2.47E-08	0.23276923	0.00029238	0.165447772	0.010569783	0.071829052	0.269715998	-0.060938681	0.349254203	-0.230290316	0.000340569	-0.015671252	0.809937837	-0.002983469	0.963482011	0.02048531	0.753216414	-0.094103495	0.147804976	0.072289854	0.266647567	-0.025537069	0.69509037	-0.185575446	0.00406798	-0.227391613	0.000406247	-0.136929662	0.034748174
OLFML3	brown	-0.323770947	3.28E-07	0.323770947	3.28E-07	0.187152631	0.003759145	0.514854807	1.64E-17	0.215976247	0.000796379	-0.162957278	0.011815818	-0.36251741	8.39E-09	-0.010787778	0.868507681	-0.0124857	0.848045087	-0.305238479	1.59E-06	-0.287202069	6.71E-06	-0.471233112	1.47E-14	0.172568931	0.007623721	0.224164174	0.000493098	-0.190061196	0.003244588	-0.106388737	0.101568977	-0.248660526	0.000105743	-0.115325659	0.075779068
YIPF3	brown	-0.260203743	4.84E-05	0.260203743	4.84E-05	0.134427315	0.038233702	0.649566375	6.50E-30	0.077136304	0.235818667	-0.075275226	0.247346868	-0.261817477	4.32E-05	-0.266040127	3.21E-05	-0.213459514	0.000919603	-0.489103419	1.02E-15	-0.276834918	1.47E-05	-0.487602312	1.28E-15	0.450933669	2.54E-13	0.046758204	0.47279093	0.10915749	0.092926589	-0.206170319	0.00138228	-0.37394118	2.59E-09	-0.01691839	0.795134806
RXRB	brown	-0.216970313	0.00075205	0.216970313	0.00075205	-0.005167172	0.936797113	0.698497941	3.74E-36	0.420948524	1.22E-11	0.546578779	6.11E-20	0.365634973	6.11E-09	-0.20387961	0.001566788	0.106002775	0.102822656	-0.11059072	0.088689076	-0.193683464	0.002693264	-0.089591148	0.168314449	-0.039546737	0.543769389	-0.195717613	0.002422373	-0.142278237	0.028193586	-0.249882683	9.75E-05	-0.238893583	0.000199164	-0.131579797	0.042554843
PPP1R15A	brown	-0.300976151	2.26E-06	0.300976151	2.26E-06	0.06243221	0.337547533	0.570066509	6.53E-22	0.41825227	1.70E-11	0.265070457	3.44E-05	-0.011704253	0.857450952	-0.206897664	0.001328	0.035761083	0.583028667	-0.094672499	0.145359678	-0.238161121	0.000208632	-0.159430669	0.013801148	-0.149807937	0.020776639	-0.131689162	0.042381607	0.102215444	0.115782991	-0.058839572	0.366134925	-0.120968928	0.062428431	-0.212623516	0.00096427
MRPL4	brown	-0.370656311	3.64E-09	0.370656311	3.64E-09	0.186549768	0.003874603	0.881141898	1.01E-78	0.559420134	5.34E-21	0.346232364	4.16E-08	0.007865488	0.903924017	-0.232539313	0.000296566	0.046796407	0.472428906	-0.302886731	1.93E-06	-0.383178134	9.64E-10	-0.421710783	1.11E-11	0.030911639	0.635154627	-0.1767877	0.006246354	-0.105962037	0.10295569	-0.315133503	6.94E-07	-0.300942457	2.26E-06	-0.066306598	0.308362363
TRIP10	brown	-0.362913814	8.06E-09	0.362913814	8.06E-09	0.085226184	0.190105032	0.619550626	1.27E-26	0.669133732	2.89E-32	0.158555172	0.014337214	-0.202204712	0.001715666	-0.161248802	0.012743792	0.052267441	0.422179165	-0.077601694	0.232995879	-0.382018942	1.09E-09	-0.278503292	1.30E-05	-0.281730966	1.02E-05	-0.180522769	0.005217444	-0.214805426	0.000851676	-0.12619707	0.051846739	0.09306654	0.152341434	-0.045169972	0.487974694
NBL1	brown	-0.438566028	1.31E-12	0.438566028	1.31E-12	0.249869393	9.76E-05	0.647458874	1.14E-29	0.557762434	7.36E-21	0.038563268	0.553841745	-0.32682074	2.50E-07	-0.14813304	0.022261325	0.152640675	0.018460396	-0.146449708	0.023844977	-0.342237232	6.08E-08	-0.437638842	1.48E-12	-0.194506711	0.00258048	-0.194436591	0.002589916	-0.282240501	9.80E-06	-0.149572029	0.020980422	-0.140119491	0.030699254	-0.155155288	0.016595816
AES	brown	-0.452847727	1.95E-13	0.452847727	1.95E-13	0.220609952	0.000608458	0.827712123	3.80E-61	0.702039234	1.18E-36	0.179712517	0.005426743	-0.160333273	0.013266976	-0.100566178	0.121811121	0.057390092	0.378081549	-0.153161186	0.018060142	-0.395744879	2.40E-10	-0.37327298	2.77E-09	-0.235377247	0.000248585	-0.138417966	0.032805888	-0.254319528	7.24E-05	-0.054084465	0.406205422	-0.143748659	0.026588939	-0.138460675	0.032751543
FAM50A	brown	-0.306857494	1.39E-06	0.306857494	1.39E-06	0.453065738	1.90E-13	0.671138505	1.62E-32	0.383649262	9.16E-10	-0.070565769	0.27825114	-0.354887073	1.80E-08	-0.125909525	0.052387218	-0.024314398	0.709011075	-0.232166149	0.000303481	-0.195984374	0.002388749	-0.500836241	1.62E-16	0.056468624	0.385798879	-0.07364163	0.257784284	-0.146189762	0.024097987	-0.274869396	1.70E-05	-0.516299759	1.29E-17	-0.06435017	0.322886105
NCKAP1	brown	0.410392976	4.38E-11	-0.410392976	4.38E-11	-0.459828828	7.45E-14	-0.74716367	9.35E-44	-0.273602341	1.86E-05	-0.259529183	5.07E-05	0.135146774	0.037202549	0.216809294	0.000759072	0.15520144	0.016563189	0.517333357	1.08E-17	0.452592321	2.02E-13	0.584841217	3.11E-23	-0.356597528	1.52E-08	0.011967936	0.854274822	0.0367382	0.572770574	0.350329055	2.81E-08	0.42008113	1.36E-11	0.02257057	0.729032575
ADAMTSL4	brown	-0.320294913	4.44E-07	0.320294913	4.44E-07	-0.135595705	0.03657112	0.488606423	1.10E-15	0.435216174	2.03E-12	0.046518438	0.47506644	-0.262130652	4.23E-05	-0.224819905	0.000474169	-0.070665385	0.27757154	-0.15502479	0.016688375	-0.322155197	3.78E-07	-0.240705898	0.000177434	-0.184795186	0.004229072	-0.109921676	0.090647518	-0.001990924	0.975626187	-0.018672165	0.774442719	0.255633835	6.62E-05	-0.150557591	0.020140404
TP53INP2	brown	-0.178727437	0.005691327	0.178727437	0.005691327	-0.015540124	0.81149831	0.352220505	2.33E-08	0.465335663	3.43E-14	0.07522272	0.247677697	-0.102951502	0.113169026	-0.156039337	0.015980504	0.234954209	0.000255246	0.108201128	0.095842923	-0.137015214	0.03463394	-0.062046474	0.340546764	-0.29205857	4.60E-06	-0.174443607	0.00698136	-0.184708626	0.004247293	-0.219572728	0.000646554	0.055045598	0.397902964	-0.029568561	0.64993018
THOC6	brown	-0.260229872	4.83E-05	0.260229872	4.83E-05	0.469310865	1.94E-14	0.481686985	3.14E-15	0.390112943	4.50E-10	0.506805019	6.19E-17	0.02308516	0.723104548	-0.126276774	0.051697749	0.089950053	0.166609262	-0.220284182	0.000620193	-0.299434433	2.56E-06	-0.349925438	2.92E-08	0.003917134	0.952065893	-0.180216075	0.0052958	-0.197606862	0.002193224	-0.36648047	5.61E-09	-0.225653899	0.000451068	-0.057701167	0.375497762
RAB11B	brown	-0.415795832	2.29E-11	0.415795832	2.29E-11	0.274520458	1.74E-05	0.770690902	4.34E-48	0.367443179	5.08E-09	0.197073477	0.002255832	0.022362358	0.731435761	-0.196112424	0.00237276	-0.021750763	0.73850989	-0.284843282	8.04E-06	-0.318962155	4.99E-07	-0.283934096	8.62E-06	0.066189216	0.309221461	-0.136579283	0.035219363	-0.082344698	0.205579427	-0.234834711	0.000257158	-0.245689971	0.000128548	-0.138726428	0.032415104
ZBTB48	brown	-0.265854921	3.26E-05	0.265854921	3.26E-05	0.371801993	3.23E-09	0.762201725	1.81E-46	0.364506685	6.86E-09	0.044778728	0.491754778	-0.18984607	0.00328034	-0.132477654	0.041150085	-0.028267577	0.664374337	-0.226279024	0.000434441	-0.147817218	0.022551323	-0.459399835	7.91E-14	0.097072142	0.135384779	-0.094751733	0.145021629	-0.132731424	0.040760193	-0.333361175	1.39E-07	-0.629809128	1.05E-27	-0.047355127	0.467151784
DEK	brown	0.522556159	4.45E-18	-0.522556159	4.45E-18	-0.36262409	8.30E-09	-0.635143828	2.75E-28	-0.310857863	9.97E-07	-0.161424482	0.012645501	0.339483926	7.87E-08	0.313144834	8.22E-07	0.198869247	0.002051303	0.632927297	4.81E-28	0.662175264	2.08E-31	0.774731232	6.93E-49	-0.300502264	2.35E-06	0.05688595	0.382291987	0.021851337	0.737345049	0.262304738	4.18E-05	0.091137472	0.161059696	0.079568149	0.221331613
CD81	brown	-0.38032217	1.31E-09	0.38032217	1.31E-09	0.06559814	0.313571293	0.736390017	6.28E-42	0.264229237	3.65E-05	-0.039243197	0.546868465	-0.306801281	1.40E-06	-0.143093389	0.027294076	-0.150215385	0.020428709	-0.428254997	4.93E-12	-0.341885246	6.29E-08	-0.459385714	7.93E-14	0.240819945	0.000176143	0.089153316	0.170412206	-0.027446166	0.673558684	-0.140037538	0.030798007	-0.176554046	0.006316378	-0.101683874	0.117699908
TGFB1	brown	-0.562833078	2.75E-21	0.562833078	2.75E-21	0.49203909	6.48E-16	0.839663928	1.67E-64	0.342453947	5.96E-08	0.170323166	0.008462165	-0.199694649	0.001963089	-0.207383434	0.001292844	-0.223035345	0.000527332	-0.605838303	3.10E-25	-0.582138463	5.49E-23	-0.580214221	8.20E-23	0.304843101	1.65E-06	0.01897791	0.770851142	0.086578582	0.183143583	-0.273221747	1.92E-05	-0.224051268	0.000496427	-0.143628832	0.026716705
C1R	brown	-0.315000344	7.02E-07	0.315000344	7.02E-07	0.116017081	0.074028292	0.452909714	1.94E-13	0.155543991	0.016322771	-0.01921898	0.768022732	-0.290851902	5.06E-06	0.158230891	0.014540354	-0.050103981	0.441667513	-0.38794078	5.73E-10	-0.321061055	4.16E-07	-0.431982163	3.07E-12	0.190072437	0.003242729	0.380927631	1.23E-09	0.066893782	0.304088452	-0.119420255	0.065883781	-0.118590547	0.067798492	-0.203107652	0.001633872
EHBP1L1	brown	-0.38307264	9.75E-10	0.38307264	9.75E-10	0.263527598	3.84E-05	0.839236948	2.23E-64	0.637387544	1.56E-28	0.351325496	2.55E-08	0.047719804	0.463724986	-0.077985619	0.230685207	0.126836837	0.050660829	-0.110174148	0.089904455	-0.298074102	2.85E-06	-0.303537862	1.83E-06	-0.167496747	0.009633238	-0.206188454	0.001380903	-0.182052633	0.00484192	-0.156841276	0.015439677	-0.367971933	4.81E-09	-0.135850279	0.036217106
CTSA	brown	-0.337055078	9.86E-08	0.337055078	9.86E-08	0.149081404	0.021409788	0.547191251	5.46E-20	0.41025149	4.46E-11	0.136202923	0.035731514	-0.19129539	0.003046207	-0.061865178	0.341962238	0.05390132	0.407799037	-0.357860789	1.34E-08	-0.48070161	3.64E-15	-0.456243418	1.23E-13	0.089727692	0.167664189	0.073715959	0.25730289	0.006397944	0.921786167	-0.202500692	0.001688451	-0.056911202	0.382080414	-0.042342482	0.515640236
ZNF580	brown	-0.411367728	3.90E-11	0.411367728	3.90E-11	0.229065615	0.000367011	0.751449435	1.65E-44	0.168238939	0.00931259	-0.048461975	0.456794131	-0.280276869	1.14E-05	-0.278443561	1.30E-05	-0.215913399	0.000799261	-0.509823099	3.78E-17	-0.359749797	1.11E-08	-0.520523474	6.30E-18	0.412438556	3.43E-11	0.011057992	0.865244956	-0.006231717	0.923812031	-0.279158135	1.24E-05	-0.271787726	2.13E-05	0.023749789	0.715472493
RAC1	brown	-0.050651666	0.436686198	0.050651666	0.436686198	0.017984687	0.782535922	0.348186745	3.45E-08	0.224885368	0.000472317	0.141100765	0.029537662	0.258633429	5.39E-05	0.012045543	0.853340472	0.020762813	0.749983565	0.090817322	0.162542115	0.007107554	0.913143723	0.166336172	0.01015426	-0.109237506	0.092685834	-0.071651582	0.270904144	-0.08294661	0.202274099	-0.060692951	0.35120456	-0.23075108	0.000331087	-0.06507879	0.317426142
TCIRG1	brown	-0.392851307	3.32E-10	0.392851307	3.32E-10	0.355915948	1.62E-08	0.63475906	3.03E-28	0.108397284	0.095238905	-0.002423527	0.97033227	-0.341001272	6.83E-08	-0.154817154	0.016836572	-0.325866071	2.72E-07	-0.646554195	1.45E-29	-0.436241737	1.78E-12	-0.676002248	3.90E-33	0.497741888	2.65E-16	0.168922835	0.009025541	0.150386115	0.020284426	-0.308824384	1.18E-06	-0.320555344	4.34E-07	0.003344047	0.959072142
RARG	brown	-0.389746783	4.69E-10	0.389746783	4.69E-10	-0.016842143	0.796037786	0.49927697	2.08E-16	0.612096986	7.36E-26	0.641079504	6.03E-29	0.244290336	0.000140821	-0.10508399	0.10585626	0.125839451	0.052519638	-0.122142405	0.059910583	-0.511078574	3.07E-17	-0.144196564	0.026115995	-0.238684804	0.000201821	-0.213506002	0.000917176	-0.190877644	0.003112089	-0.021216945	0.74470245	0.315015831	7.01E-07	-0.143073365	0.027315873
MYH14	brown	-0.369472211	4.12E-09	0.369472211	4.12E-09	-0.06437891	0.322669591	0.664098433	1.21E-31	0.733239439	2.07E-41	0.105836503	0.103366495	-0.228221321	0.000386337	-0.17637428	0.006370729	0.209106479	0.001174915	0.0679911	0.296206709	-0.284292261	8.39E-06	-0.260038821	4.89E-05	-0.42055664	1.28E-11	-0.262502691	4.12E-05	-0.434089948	2.34E-12	-0.092140271	0.156482013	0.085855233	0.186843289	-0.147930199	0.022447208
SMTN	brown	-0.448085956	3.73E-13	0.448085956	3.73E-13	0.286957948	6.84E-06	0.837893379	5.46E-64	0.609444646	1.36E-25	0.215856816	0.000801864	-0.194505332	0.002580665	-0.231495972	0.000316277	0.165432022	0.010577283	-0.251492691	8.76E-05	-0.40649297	6.95E-11	-0.461866107	5.60E-14	-0.095676651	0.141119605	-0.24405454	0.000142993	-0.096326782	0.138425198	-0.26487381	3.49E-05	-0.232069268	0.0003053	-0.143286343	0.027084791
G6PD	brown	-0.281922009	1.00E-05	0.281922009	1.00E-05	0.104866651	0.106584076	0.657262849	8.10E-31	0.5474503	5.20E-20	0.043562722	0.503602468	-0.258743164	5.35E-05	-0.157310915	0.015130442	0.141781987	0.028753529	-0.185797951	0.004023068	-0.346207081	4.17E-08	-0.453093074	1.89E-13	-0.083050246	0.2017089	-0.238438374	0.000205	-0.115779893	0.074625147	-0.165529115	0.010531122	-0.133450331	0.039672519	0.002471699	0.969742837
TP53	brown	-0.310269373	1.05E-06	0.310269373	1.05E-06	0.071180639	0.274074332	0.754197024	5.33E-45	0.519873608	7.04E-18	0.485028697	1.90E-15	0.178945203	0.005631862	-0.174496848	0.006963844	0.132941669	0.040439534	-0.111638548	0.085690081	-0.252295392	8.30E-05	-0.2046818	0.001499755	-0.106900961	0.099923885	-0.27890608	1.26E-05	-0.272815768	1.97E-05	-0.246261724	0.000123829	-0.179306243	0.005534498	-0.143819986	0.026513136
ATP6AP1	brown	-0.480720949	3.63E-15	0.480720949	3.63E-15	0.185343914	0.004115195	0.784198719	8.09E-51	0.601395489	8.46E-25	0.367063546	5.28E-09	-0.169303788	0.008869073	-0.274715135	1.72E-05	0.09761841	0.13318923	-0.34606563	4.23E-08	-0.548635582	4.17E-20	-0.54158759	1.53E-19	-0.006501712	0.920521763	-0.170981909	0.008208118	-0.292392592	4.48E-06	-0.337717095	9.28E-08	-0.011129999	0.864375882	-0.07597169	0.242987643
OLFML2B	brown	-0.229421513	0.000359137	0.229421513	0.000359137	0.393236117	3.18E-10	0.448931196	3.33E-13	-0.106315233	0.101806797	0.009780026	0.880695091	-0.062423065	0.33761844	-0.13892519	0.032165402	-0.223156361	0.00052356	-0.451204733	2.44E-13	-0.162030545	0.012311512	-0.289821933	5.48E-06	0.482065213	2.97E-15	0.237595642	0.000216228	0.152634571	0.018465135	-0.348011129	3.51E-08	-0.457819313	9.86E-14	-0.061836894	0.342183409
MARK2	brown	-0.326611005	2.55E-07	0.326611005	2.55E-07	0.378799744	1.54E-09	0.642806687	3.86E-29	0.500226033	1.79E-16	0.358628177	1.24E-08	0.072460447	0.265517681	-0.108571477	0.09470506	0.062323856	0.338388313	-0.175596884	0.006610613	-0.351467383	2.51E-08	-0.376652637	1.94E-09	-0.061006969	0.34871342	-0.252444962	8.22E-05	-0.152719239	0.018399493	-0.168278808	0.009295636	-0.379479031	1.44E-09	-0.061573349	0.344248557
RPS3	brown	0.250569433	9.32E-05	-0.250569433	9.32E-05	-0.162483882	0.012066788	-0.38799538	5.69E-10	-0.173927404	0.007153234	-0.321795166	3.90E-07	-0.138888035	0.032211955	0.050151792	0.441231382	-0.006324843	0.922677016	0.119773258	0.065082696	0.141773155	0.02876358	0.107539296	0.0979034	-0.062837323	0.334415852	0.089050984	0.170905299	0.009037589	0.889692026	0.283310129	9.04E-06	0.162744565	0.011928012	0.093737026	0.149396332
BCL2L1	brown	-0.458046137	9.55E-14	0.458046137	9.55E-14	0.436134285	1.80E-12	0.715222034	1.38E-38	0.307775291	1.29E-06	0.557519093	7.72E-21	0.218492042	0.000688582	-0.253849504	7.47E-05	-0.1669006	0.009897834	-0.490131403	8.70E-16	-0.515752962	1.41E-17	-0.327610365	2.33E-07	0.26668181	3.07E-05	-0.115628029	0.075009339	-0.007126982	0.912907249	-0.273411806	1.89E-05	-0.156041653	0.015978918	-0.128194584	0.048218733
HES4	brown	-0.561605639	3.49E-21	0.561605639	3.49E-21	0.37262408	2.97E-09	0.766500273	2.80E-47	0.600974803	9.30E-25	0.359046083	1.19E-08	-0.143408247	0.026953281	-0.159342121	0.013854554	-0.06909051	0.288447373	-0.345560681	4.44E-08	-0.523011495	4.12E-18	-0.458459337	9.02E-14	-0.104709026	0.107114389	-0.162467065	0.012075789	-0.133551489	0.039521453	-0.217749784	0.000718895	-0.065095097	0.317304634	-0.24175238	0.000165916
MTA1	brown	-0.368113413	4.74E-09	0.368113413	4.74E-09	0.385191654	7.74E-10	0.853229229	1.15E-68	0.473600912	1.04E-14	0.253287264	7.76E-05	-0.028684705	0.65972935	-0.141505792	0.029069276	0.060830469	0.350112238	-0.183903211	0.004420254	-0.223535161	0.000511912	-0.322624625	3.62E-07	-0.002582937	0.968381827	-0.173635503	0.007252087	-0.166100394	0.010263105	-0.34368232	5.30E-08	-0.518034024	9.62E-18	-0.125382147	0.053390659
ENG	brown	-0.562112929	3.16E-21	0.562112929	3.16E-21	0.106835471	0.100133034	0.693585475	1.80E-35	0.231617185	0.000313926	0.207747056	0.001267089	-0.170411098	0.008427855	-0.331816194	1.59E-07	-0.2961464	3.33E-06	-0.675985858	3.92E-33	-0.630688625	8.41E-28	-0.522548009	4.46E-18	0.335461671	1.14E-07	0.018004161	0.782306339	0.179083441	0.005594402	-0.169584841	0.008755186	0.15353876	0.017774547	-0.182502786	0.004736149
EIF4G1	brown	-0.431250657	3.37E-12	0.431250657	3.37E-12	0.162129086	0.012257948	0.589012733	1.28E-23	0.738095025	3.27E-42	0.545374668	7.64E-20	0.041311973	0.525920628	-0.116227813	0.073501272	0.174069316	0.007105611	-0.105028409	0.106042015	-0.520268544	6.58E-18	-0.313190114	8.19E-07	-0.349380568	3.08E-08	-0.338564481	8.58E-08	-0.328185995	2.21E-07	0.138265085	0.033001049	0.176048605	0.00647026	-0.13672319	0.035025185
BANF1	brown	-0.278917854	1.26E-05	0.278917854	1.26E-05	0.216735782	0.000762298	0.513643866	2.01E-17	0.483076519	2.55E-15	0.405555445	7.75E-11	0.019369219	0.766261576	-0.05222689	0.422539779	0.105092204	0.105828832	-0.239816723	0.000187803	-0.443426941	6.94E-13	-0.273891237	1.82E-05	-0.05186016	0.425809188	-0.059602415	0.359942628	-0.09914806	0.127186924	-0.168755165	0.00909518	0.04659672	0.474322839	-0.085062837	0.190958791
PITX2	brown	0.200899591	0.001840516	-0.200899591	0.001840516	-0.291448581	4.83E-06	-0.248630806	0.000105951	0.038198428	0.557601262	-0.007126696	0.912910727	0.116435381	0.072985148	0.134259975	0.038476969	-0.02936791	0.652149573	0.292763882	4.35E-06	0.184450127	0.004302128	0.393579582	3.06E-10	-0.324196376	3.16E-07	0.003751689	0.954088186	-0.067352373	0.300777836	0.176861682	0.006224328	0.265464167	3.35E-05	-0.015922775	0.80694673
ABR	brown	-0.266498876	3.11E-05	0.266498876	3.11E-05	0.343441546	5.43E-08	0.650290244	5.36E-30	0.598527679	1.60E-24	0.592566248	5.93E-24	0.344049789	5.12E-08	-0.004929243	0.939701735	0.178419027	0.005776508	0.021977127	0.735889009	-0.234495702	0.000262653	-0.085640925	0.187949871	-0.269656738	2.48E-05	-0.247815672	0.00011181	-0.246911363	0.000118664	-0.235812747	0.000241897	-0.319714158	4.67E-07	-0.220228343	0.000622226
MANSC1	brown	0.301598066	2.15E-06	-0.301598066	2.15E-06	-0.492531574	6.00E-16	-0.389927517	4.60E-10	0.095004165	0.143948617	-0.247194357	0.000116478	-0.164389476	0.011084328	0.065878549	0.311502751	0.253153188	7.83E-05	0.515372275	1.50E-17	0.291550675	4.79E-06	0.257419348	5.86E-05	-0.484765141	1.98E-15	-0.202152359	0.001720521	-0.268412327	2.71E-05	0.434572905	2.20E-12	0.393284783	3.16E-10	0.168412455	0.009239005
JUNB	brown	-0.367961139	4.82E-09	0.367961139	4.82E-09	0.054556011	0.402119341	0.521464854	5.37E-18	0.476706875	6.60E-15	0.282730197	9.45E-06	-0.049323277	0.448823767	-0.171941294	0.007850257	0.012556586	0.847192906	-0.070597323	0.278035749	-0.283144258	9.15E-06	-0.126061035	0.052101854	-0.269624124	2.49E-05	-0.168655876	0.009136643	0.019299935	0.767073603	0.090152337	0.1656539	0.105449762	0.104640226	-0.317501633	5.66E-07
RBBP8	brown	0.366751782	5.45E-09	-0.366751782	5.45E-09	-0.155617355	0.016271679	-0.438654537	1.30E-12	-0.322237643	3.75E-07	-0.186321283	0.003919191	0.218909013	0.000672076	0.203173286	0.001628068	-0.041323026	0.525809813	0.356292474	1.56E-08	0.47088402	1.55E-14	0.580839447	7.20E-23	-0.103476093	0.111334412	0.087900854	0.176520477	0.165620261	0.01048795	0.209595705	0.00114328	0.045619072	0.483654897	0.067200831	0.301869185
WDR1	brown	-0.352028014	2.38E-08	0.352028014	2.38E-08	0.102190485	0.115872447	0.640746339	6.58E-29	0.477564262	5.81E-15	0.612407916	6.84E-26	0.267624594	2.87E-05	-0.20360976	0.001589946	-0.030098276	0.644085884	-0.275828365	1.58E-05	-0.42220048	1.05E-11	-0.241303463	0.000170769	-0.044479438	0.494656933	-0.128459428	0.047754015	-0.04180018	0.52103731	-0.096499061	0.137717846	0.005246427	0.935829766	-0.14176999	0.028767184
TPI1	brown	-0.419556011	1.45E-11	0.419556011	1.45E-11	0.256641023	6.18E-05	0.78524101	4.89E-51	0.614142563	4.56E-26	0.1712138	0.008120316	-0.236752485	0.000228033	-0.164794297	0.010884949	0.089635912	0.168101063	-0.256897739	6.08E-05	-0.432483058	2.88E-12	-0.479217183	4.55E-15	-0.050619578	0.43697715	-0.181868164	0.004885874	-0.208824613	0.001193505	-0.289081257	5.80E-06	-0.16472183	0.010920405	-0.084451419	0.194179359
CKS2	brown	0.27216874	2.07E-05	-0.27216874	2.07E-05	0.094442082	0.146346162	-0.356011821	1.61E-08	-0.318061643	5.39E-07	0.110067222	0.090218559	0.191049651	0.003084807	0.032606365	0.61671513	0.004368517	0.946550096	0.015665052	0.810011608	0.192351005	0.002885324	0.140321749	0.030456692	0.16896589	0.009007736	0.008042321	0.901774786	0.225606916	0.000452341	-0.030166564	0.643334051	-0.056377811	0.386564589	0.122458337	0.059247193
IRF7	brown	-0.303602769	1.82E-06	0.303602769	1.82E-06	0.282619889	9.52E-06	0.44259882	7.74E-13	-0.052754084	0.417865533	-0.203688246	0.001583179	-0.344100876	5.10E-08	0.278013656	1.35E-05	-0.240766923	0.000176742	-0.553881395	1.55E-20	-0.296155768	3.33E-06	-0.536818551	3.64E-19	0.482821321	2.65E-15	0.40109716	1.30E-10	0.22750573	0.000403453	-0.126725086	0.050866334	-0.307757935	1.29E-06	-0.185402607	0.00410318
SELO	brown	-0.344175487	5.06E-08	0.344175487	5.06E-08	0.410105421	4.54E-11	0.785736095	3.85E-51	0.600258356	1.09E-24	0.246578632	0.000121284	-0.085536707	0.188489737	-0.085468681	0.188842737	0.152958652	0.018214977	-0.121180417	0.061968336	-0.274980926	1.68E-05	-0.403079995	1.03E-10	-0.117209636	0.071085874	-0.215799238	0.000804521	-0.289306368	5.70E-06	-0.301488208	2.17E-06	-0.48215153	2.93E-15	-0.114014957	0.079190029
KRT18	brown	-0.166175095	0.010228509	0.166175095	0.010228509	0.160367964	0.013246812	0.306762951	1.40E-06	0.392926148	3.29E-10	0.130167448	0.044845993	-0.079760598	0.220212828	-0.142987324	0.027409707	-0.230894063	0.000328195	-0.120146951	0.064243377	-0.256705807	6.16E-05	-0.162896987	0.011847523	-0.206092717	0.00138819	-0.09377311	0.149239066	0.009318898	0.886281362	-0.043685814	0.502396398	-0.012502114	0.847847734	-0.011116808	0.864535074
ZNF385A	brown	-0.553924971	1.54E-20	0.553924971	1.54E-20	0.229395651	0.000359704	0.745785028	1.62E-43	0.654108948	1.92E-30	0.125493426	0.053177611	-0.269479121	2.51E-05	-0.156509109	0.015661717	0.073398078	0.259366021	-0.172061129	0.007806547	-0.450841422	2.57E-13	-0.397408382	1.98E-10	-0.224546226	0.000481986	-0.199094923	0.002026832	-0.334816392	1.21E-07	-0.157985086	0.014696009	0.053451079	0.41173247	-0.135862752	0.036199837
HMG20B	brown	-0.395727796	2.40E-10	0.395727796	2.40E-10	0.521183835	5.63E-18	0.799970916	2.89E-54	0.522556968	4.45E-18	0.412682781	3.34E-11	0.047037652	0.470146349	-0.164184155	0.011186677	0.048442417	0.456976028	-0.268891901	2.62E-05	-0.37177244	3.24E-09	-0.355077039	1.76E-08	-0.019196863	0.768282097	-0.200705308	0.001859794	-0.125193784	0.053752901	-0.211629835	0.001019955	-0.351336491	2.54E-08	-0.140822703	0.029862943
MTPN	brown	0.295313179	3.56E-06	-0.295313179	3.56E-06	-0.113968181	0.079314014	-0.445804196	5.06E-13	-0.325828309	2.73E-07	-0.426062777	6.49E-12	0.008222381	0.899587062	0.113863068	0.079593201	-0.051128227	0.432378054	0.218571775	0.000685397	0.347675764	3.62E-08	0.298184679	2.83E-06	0.000447997	0.994514609	0.166065642	0.010279235	0.152509154	0.018562744	0.140254952	0.030536618	-0.036808689	0.572033864	0.026991314	0.678665459
SAC3D1	brown	-0.204274501	0.001533455	0.204274501	0.001533455	0.242647306	0.000156625	0.682810439	5.09E-34	0.413309588	3.09E-11	-0.137538516	0.033942113	-0.356181491	1.58E-08	-0.22111678	0.000590607	0.036400809	0.576302985	-0.13320907	0.040034775	-0.127137012	0.050112241	-0.438860366	1.26E-12	-0.026891662	0.679786249	-0.217423703	0.000732597	-0.146577061	0.023721859	-0.098257884	0.130653976	-0.456677858	1.15E-13	0.02005547	0.758232438
NYNRIN	brown	-0.279915554	1.17E-05	0.279915554	1.17E-05	-0.066502135	0.306934752	0.607003049	2.38E-25	0.562555738	2.90E-21	-0.130835424	0.043749815	-0.316062122	6.41E-07	-0.079447803	0.222033289	0.160004293	0.013459529	0.102411319	0.115082819	-0.104668511	0.107251029	-0.280480987	1.12E-05	-0.314110975	7.57E-07	-0.185164882	0.004152042	-0.391287642	3.95E-10	-0.00946052	0.884565087	-0.201032303	0.001827452	-0.037530459	0.56451619
PRICKLE3	brown	-0.313191305	8.19E-07	0.313191305	8.19E-07	0.328139769	2.22E-07	0.817119962	2.21E-58	0.57181385	4.59E-22	0.454371285	1.59E-13	0.211486044	0.001028254	-0.147966752	0.022413612	0.074896274	0.249741482	-0.102362359	0.115257518	-0.248135666	0.000109474	-0.188278922	0.003551734	-0.126135768	0.051961574	-0.263019935	3.98E-05	-0.202574303	0.001681744	-0.264688761	3.54E-05	-0.425048178	7.36E-12	-0.102000825	0.116553981
ACAP3	brown	-0.418116509	1.73E-11	0.418116509	1.73E-11	0.24626182	0.000123828	0.855697822	1.82E-69	0.695772871	8.98E-36	0.133740512	0.039240475	-0.21907903	0.000665451	-0.141402381	0.029188255	0.22773831	0.000397815	-0.078449208	0.227916698	-0.308712223	1.19E-06	-0.4359831	1.84E-12	-0.202428748	0.00169503	-0.304889266	1.64E-06	-0.352303657	2.32E-08	-0.179830988	0.005395678	-0.315647766	6.64E-07	-0.087643132	0.177797256
ELMO3	brown	-0.270521055	2.33E-05	0.270521055	2.33E-05	0.225089823	0.000466575	0.761736166	2.22E-46	0.749507478	3.64E-44	0.210820644	0.00106747	-0.127043965	0.050281759	-0.025765742	0.692497955	0.329195234	2.02E-07	0.0723122	0.266499374	-0.193626498	0.002701231	-0.328314804	2.19E-07	-0.378181461	1.65E-09	-0.331400165	1.66E-07	-0.356499059	1.53E-08	-0.255900065	6.50E-05	-0.365973316	5.91E-09	-0.068904831	0.289748195
MAD1L1	brown	-0.377961881	1.69E-09	0.377961881	1.69E-09	0.497444042	2.78E-16	0.769904993	6.17E-48	0.576791729	1.66E-22	0.195764811	0.002416393	-0.203331345	0.001614168	-0.130186905	0.044813742	0.062401241	0.337787701	-0.24105067	0.000173559	-0.342612959	5.87E-08	-0.509718413	3.85E-17	-0.083747844	0.197934165	-0.127535913	0.049390886	-0.125981182	0.052252093	-0.256063475	6.43E-05	-0.394117006	2.88E-10	-0.116768982	0.072161814
COL5A1	brown	-0.353138695	2.13E-08	0.353138695	2.13E-08	0.193878009	0.002666215	0.570252197	6.29E-22	0.250294273	9.49E-05	0.034933711	0.591780681	-0.101015399	0.120145546	-0.067637782	0.298729534	0.031858112	0.624827829	-0.261002408	4.58E-05	-0.269802929	2.45E-05	-0.26852224	2.69E-05	0.069173071	0.287870225	0.054347479	0.403923298	-0.085604204	0.188139965	-0.169275138	0.008880757	-0.222198327	0.000554123	-0.217785922	0.000717391
BAG6	brown	-0.501750254	1.40E-16	0.501750254	1.40E-16	0.296540783	3.23E-06	0.828640238	2.13E-61	0.561307687	3.70E-21	0.068814936	0.290379392	-0.379380193	1.45E-09	-0.240667898	0.000177866	-0.005615981	0.931320415	-0.34879663	3.25E-08	-0.460417264	6.86E-14	-0.581489882	6.28E-23	0.002955834	0.963820039	-0.11572128	0.074773239	-0.165313857	0.010633704	-0.270520278	2.33E-05	-0.187713514	0.003654526	-0.102874181	0.113441425
FLII	brown	-0.458614424	8.83E-14	0.458614424	8.83E-14	0.277141165	1.44E-05	0.75706044	1.61E-45	0.654939932	1.53E-30	0.17540724	0.006670343	-0.189520926	0.003335053	-0.195700474	0.002424548	0.087288605	0.179564768	-0.113506121	0.080547207	-0.33677337	1.01E-07	-0.348768886	3.26E-08	-0.264615994	3.55E-05	-0.209398779	0.001155919	-0.229245285	0.000363016	-0.235903706	0.000240521	-0.200974611	0.00183312	-0.236034343	0.000238558
LRRC8E	brown	-0.144953323	0.025333342	0.144953323	0.025333342	0.165647332	0.010475158	0.399062383	1.64E-10	0.422190363	1.05E-11	0.04316148	0.50754441	-0.21725116	0.000739945	-0.110464239	0.089056696	-0.015838796	0.8079451	0.041782231	0.521216433	-0.10295947	0.113140983	-0.16738899	0.009680596	-0.324888978	2.97E-07	-0.227306017	0.000408354	-0.087397997	0.179018012	0.044309798	0.496305934	-0.203898637	0.001565167	-0.178620287	0.005720793
RYR1	brown	-0.11014742	0.089982888	0.11014742	0.089982888	0.0517412	0.42687286	0.568849705	8.34E-22	0.586640083	2.12E-23	0.228266488	0.00038528	-0.01477386	0.820631812	-0.113946725	0.079370938	0.197178069	0.002243428	0.16452294	0.011018242	-0.015050631	0.81732998	-0.103374598	0.111687532	-0.37549847	2.19E-09	-0.233729126	0.000275487	-0.275023417	1.68E-05	-0.22931233	0.000361536	-0.294102122	3.92E-06	-0.10821558	0.095798317
PRKY	brown	0.313366117	8.07E-07	-0.313366117	8.07E-07	-0.143526542	0.026826187	-0.304602764	1.68E-06	-0.080872536	0.213827562	-0.078055164	0.230268381	-0.021410558	0.742454524	-0.011604247	0.858656158	0.086191979	0.185114172	0.236457502	0.000232303	0.209175466	0.001170406	0.159682776	0.013650081	-0.11331752	0.08105499	-0.149887145	0.020708602	-0.108828382	0.093922079	0.094863254	0.144546838	0.055448666	0.394451649	0.746592664	1.17E-43
TECR	brown	-0.301978846	2.08E-06	0.301978846	2.08E-06	0.106244362	0.102036512	0.521040475	5.77E-18	0.500611268	1.68E-16	0.077432603	0.23401872	-0.292757685	4.35E-06	-0.141945219	0.028568306	0.064938493	0.318472762	-0.215332193	0.000826374	-0.413595097	2.99E-11	-0.538978087	2.46E-19	-0.019323407	0.766798468	-0.148711289	0.021738701	-0.337673349	9.31E-08	-0.08068798	0.214878082	-0.004290715	0.947500642	0.101008642	0.120170467
STAG3L3	brown	-0.389761665	4.68E-10	0.389761665	4.68E-10	0.424010121	8.38E-12	0.697604923	4.99E-36	0.406837583	6.67E-11	-0.038404935	0.55547178	-0.350494845	2.76E-08	-0.110520433	0.088893216	-0.073128033	0.261127603	-0.32933088	2.00E-07	-0.351607444	2.48E-08	-0.596477456	2.52E-24	0.069542619	0.285296371	-0.05711417	0.380382433	-0.184376636	0.004317834	-0.173500366	0.007298263	-0.401422494	1.25E-10	-0.038826303	0.551138955
CTBS	brown	0.285424997	7.69E-06	-0.285424997	7.69E-06	-0.41519678	2.47E-11	-0.601721344	7.87E-25	-0.646306581	1.54E-29	-0.209375491	0.001157422	0.082101111	0.206928086	-0.048755267	0.454071209	-0.255445689	6.71E-05	-0.030242335	0.642500252	0.228655484	0.000376284	0.320054436	4.54E-07	0.357015107	1.46E-08	0.185496492	0.004084026	0.274637493	1.73E-05	0.256067266	6.43E-05	0.459130593	8.21E-14	0.112213723	0.084078814
CHCHD10	brown	-0.394547781	2.74E-10	0.394547781	2.74E-10	0.20300409	0.001643069	0.795016027	3.77E-53	0.30801604	1.27E-06	0.151282722	0.019541126	-0.205896496	0.001403237	-0.350358713	2.80E-08	-0.286388225	7.15E-06	-0.53632963	3.97E-19	-0.462215431	5.33E-14	-0.552093007	2.17E-20	0.348130513	3.47E-08	-0.02846993	0.662119401	-0.095445415	0.142087535	-0.241944749	0.000163877	-0.197397588	0.002217597	0.057254298	0.379212854
CLIP2	brown	-0.315591232	6.67E-07	0.315591232	6.67E-07	0.414768902	2.60E-11	0.800609634	2.07E-54	0.487676955	1.27E-15	6.81E-05	0.99916585	-0.308456674	1.22E-06	-0.12817543	0.048252489	0.07137136	0.272787456	-0.219925184	0.000633368	-0.245021564	0.000134279	-0.502143053	1.32E-16	-0.009349447	0.885911112	-0.090107512	0.165865249	-0.130010694	0.045106542	-0.277992817	1.35E-05	-0.513720898	1.98E-17	-0.13726087	0.034307697
PEF1	brown	-0.380376315	1.30E-09	0.380376315	1.30E-09	0.348412806	3.38E-08	0.723780125	6.71E-40	0.437139635	1.58E-12	0.51574913	1.41E-17	0.044992992	0.489682693	-0.197066316	0.002256683	-0.001398021	0.98288343	-0.40731323	6.31E-11	-0.466887798	2.75E-14	-0.450768989	2.59E-13	0.164335222	0.011111292	-0.092294333	0.155787513	-0.121070429	0.062207267	-0.50615198	6.89E-17	-0.220647572	0.000607116	-0.031394274	0.6298797
PPA2	brown	0.453416838	1.81E-13	-0.453416838	1.81E-13	-0.382419856	1.05E-09	-0.387835104	5.79E-10	-0.233346926	0.000282101	-0.384465926	8.38E-10	-0.049347303	0.448602566	0.13662484	0.035157793	0.085268195	0.189885903	0.35931588	1.16E-08	0.449280489	3.17E-13	0.278240922	1.32E-05	-0.096950362	0.135878002	0.029660294	0.648916554	-0.060749866	0.350752215	0.582386768	5.21E-23	-0.01808351	0.781371082	0.135701499	0.036423648
FKBP8	brown	-0.577847752	1.34E-22	0.577847752	1.34E-22	0.193597559	0.002705287	0.816006239	4.22E-58	0.557638409	7.54E-21	0.28335514	9.01E-06	-0.097992473	0.131701668	-0.25975026	4.99E-05	-0.058161355	0.37169538	-0.332526638	1.49E-07	-0.520558937	6.26E-18	-0.45221385	2.13E-13	-0.043857284	0.500718837	-0.227701435	0.000398704	-0.195588325	0.002438824	-0.130411366	0.044443075	-0.018466487	0.776861511	-0.081212543	0.211901844
SLC25A6	brown	-0.294710933	3.73E-06	0.294710933	3.73E-06	0.21011335	0.00111066	0.523625983	3.71E-18	0.225632354	0.000451651	0.018294585	0.778884746	-0.237350078	0.000219605	-0.233107415	0.000286321	-0.19027858	0.003208819	-0.394472232	2.77E-10	-0.368273747	4.66E-09	-0.511663862	2.79E-17	0.238224337	0.000207799	0.017297617	0.790647763	-0.096660633	0.137056975	-0.055582527	0.393309435	-0.1938736	0.002666825	0.111570433	0.085882526
GNAI2	brown	-0.578567228	1.15E-22	0.578567228	1.15E-22	0.344533602	4.89E-08	0.712565651	3.45E-38	0.342235392	6.08E-08	0.136001781	0.036007807	-0.23195802	0.000307402	-0.106469427	0.101308416	-0.134298822	0.038420381	-0.575856727	2.02E-22	-0.635275455	2.66E-28	-0.596077107	2.75E-24	0.249167201	0.000102254	0.0428865	0.510255181	0.034125957	0.600382555	-0.258554744	5.42E-05	-0.032093616	0.622269509	-0.095237477	0.142962263
CDC37	brown	-0.476881345	6.43E-15	0.476881345	6.43E-15	0.303342471	1.86E-06	0.759861878	4.94E-46	0.554723731	1.32E-20	0.421606502	1.13E-11	0.036181633	0.578603165	-0.114211024	0.07867203	-0.018224704	0.779707658	-0.350975744	2.64E-08	-0.52044112	6.39E-18	-0.408854337	5.26E-11	-0.002041206	0.975010806	-0.107065237	0.099400779	-0.11973205	0.065175799	-0.162244866	0.012195276	-0.127592684	0.049288932	-0.161167506	0.012789504
LAMB2	brown	-0.367086164	5.27E-09	0.367086164	5.27E-09	0.302687218	1.96E-06	0.766470307	2.83E-47	0.591250522	7.89E-24	0.056993746	0.381389314	-0.365967999	5.91E-09	-0.121931022	0.060357848	0.053105646	0.414765378	-0.180972706	0.005104376	-0.304573488	1.68E-06	-0.518916607	8.28E-18	-0.133200008	0.040048436	-0.12741701	0.049604994	-0.296262471	3.30E-06	-0.199277159	0.002007266	-0.349803717	2.95E-08	-0.087401599	0.179000029
IGFBP5	brown	-0.463336449	4.55E-14	0.463336449	4.55E-14	0.44841717	3.56E-13	0.586880863	2.01E-23	0.384190408	8.64E-10	0.355877387	1.63E-08	0.009629956	0.882512452	-0.076796491	0.237894904	-0.059514497	0.36065294	-0.308289395	1.24E-06	-0.441287225	9.20E-13	-0.365201839	6.39E-09	0.006204408	0.924144906	-0.147942278	0.022436102	-0.140285681	0.030499827	-0.051110148	0.432541043	-0.192857467	0.002810905	-0.121220581	0.061881274
WDR11	brown	0.460054831	7.22E-14	-0.460054831	7.22E-14	-0.455450787	1.37E-13	-0.631092236	7.60E-28	-0.383814717	9.00E-10	-0.53578601	4.38E-19	-0.058260268	0.370881203	0.225899175	0.000444475	0.068235603	0.294469184	0.458918003	8.46E-14	0.570483417	6.01E-22	0.406640325	6.83E-11	-0.150388259	0.020282621	0.108525927	0.094844424	-0.00425597	0.947925173	0.523665793	3.68E-18	0.088584988	0.173164155	0.163166698	0.01170627
LTC4S	brown	-0.235068015	0.000253438	0.235068015	0.000253438	0.533165908	6.99E-19	0.551891219	2.26E-20	0.071776362	0.270068377	0.233263335	0.000283567	0.036299736	0.577363185	-0.217851346	0.000714676	-0.196136965	0.002369707	-0.456521269	1.18E-13	-0.249320633	0.000101219	-0.442646032	7.69E-13	0.41948304	1.46E-11	0.037511816	0.56470978	0.040146421	0.537672391	-0.399225774	1.61E-10	-0.592443396	6.09E-24	-0.015782888	0.808609927
PLEKHO1	brown	-0.403757347	9.56E-11	0.403757347	9.56E-11	0.455948927	1.28E-13	0.562840566	2.74E-21	0.163214028	0.011681636	-0.183526742	0.004503254	-0.431917537	3.10E-12	0.008673173	0.894113314	-0.257881949	5.68E-05	-0.547300648	5.35E-20	-0.409018653	5.16E-11	-0.616209847	2.81E-26	0.289635418	5.56E-06	0.399776486	1.51E-10	0.211743467	0.001013441	-0.127932137	0.048682965	-0.313967445	7.66E-07	-0.186460308	0.003892006
MED15	brown	-0.506251299	6.78E-17	0.506251299	6.78E-17	0.246357866	0.000123052	0.83125549	4.09E-62	0.585478183	2.71E-23	0.131820882	0.042173747	-0.235256913	0.000250463	-0.150362652	0.020304203	-0.038579452	0.553675265	-0.233274378	0.000283373	-0.363324436	7.74E-09	-0.40144929	1.25E-10	-0.148717953	0.021732741	-0.119312726	0.066129399	-0.134913612	0.037534117	-0.267167795	2.97E-05	-0.192511165	0.002861599	-0.173178774	0.007409205
PNKP	brown	-0.48979796	9.16E-16	0.48979796	9.16E-16	0.57926365	9.99E-23	0.758381246	9.26E-46	0.330563634	1.79E-07	0.064545252	0.321418312	-0.371653288	3.28E-09	-0.332847382	1.45E-07	-0.209668515	0.001138639	-0.580581119	7.59E-23	-0.512307507	2.51E-17	-0.707310163	2.05E-37	0.308165031	1.25E-06	-0.09027559	0.165073804	0.001680584	0.979424594	-0.320868661	4.23E-07	-0.322150665	3.78E-07	-0.047901106	0.462026526
AQP1	brown	-0.184232529	0.004348781	0.184232529	0.004348781	0.056525848	0.385316865	0.321871248	3.87E-07	0.035514057	0.585635441	0.210783445	0.001069703	0.139992884	0.030851929	-0.062062757	0.340419814	0.024330621	0.708825715	-0.333131609	1.41E-07	-0.287899077	6.36E-06	-0.207667097	0.001272712	0.280325006	1.13E-05	0.044847662	0.491087629	-0.033306821	0.609162537	-0.106239612	0.102051922	-0.087747325	0.177280256	-0.073914566	0.256019637
SEMA3F	brown	-0.394713629	2.69E-10	0.394713629	2.69E-10	0.228589547	0.000377795	0.821713319	1.47E-59	0.729446563	8.50E-41	0.328236195	2.20E-07	0.010662554	0.870020464	-0.122157341	0.059879082	0.174226696	0.007053128	-0.005202722	0.936363193	-0.263471031	3.85E-05	-0.296766361	3.17E-06	-0.316243381	6.31E-07	-0.333350509	1.39E-07	-0.325225353	2.88E-07	-0.183162207	0.004584957	-0.336676302	1.02E-07	-0.151473376	0.019386154
NR2F6	brown	-0.436676869	1.68E-12	0.436676869	1.68E-12	0.514470146	1.75E-17	0.751090101	1.91E-44	0.470270493	1.69E-14	0.558382757	6.53E-21	0.207620558	0.001275995	-0.177276793	0.006102022	-0.042817889	0.51093273	-0.326744283	2.52E-07	-0.446698927	4.49E-13	-0.349356418	3.08E-08	0.057017824	0.381187863	-0.213766748	0.000903672	-0.132927001	0.040461836	-0.261042809	4.56E-05	-0.340374078	7.24E-08	-0.090568641	0.163700642
VPS28	brown	-0.333784397	1.33E-07	0.333784397	1.33E-07	0.365964009	5.91E-09	0.658319519	6.06E-31	0.61237755	6.89E-26	0.065888048	0.311432836	-0.28767314	6.47E-06	-0.099868591	0.124433052	0.142710092	0.027713927	-0.182122057	0.004825471	-0.351726292	2.45E-08	-0.563981056	2.19E-21	-0.151593194	0.019289309	-0.103992525	0.10955119	-0.241081509	0.000173216	-0.215601167	0.000813723	-0.328816453	2.09E-07	-0.071721206	0.270437595
DHRS11	brown	-0.141648794	0.028905428	0.141648794	0.028905428	0.053725064	0.409336206	0.619408662	1.31E-26	0.47050752	1.63E-14	0.094849056	0.144607218	-0.093128679	0.152066657	-0.248954361	0.000103706	0.143141357	0.027241919	0.027355857	0.674571431	-0.041912741	0.519914719	-0.258745164	5.35E-05	-0.132432305	0.041220089	-0.260018832	4.90E-05	-0.316485282	6.18E-07	-0.228082985	0.000389593	-0.394629705	2.72E-10	0.014144257	0.828154567
LOC105379045	brown	0.129768031	0.045512385	-0.129768031	0.045512385	-0.188355519	0.003538011	-0.530427398	1.13E-18	-0.272514689	2.02E-05	-0.390313314	4.40E-10	-0.276310701	1.53E-05	0.195244534	0.002483063	-0.07383384	0.256540691	0.013676103	0.833758482	0.013790607	0.83238705	-0.010044633	0.877492179	0.025496678	0.695548646	0.207638202	0.001274749	0.135054602	0.037333324	0.522018635	4.88E-18	0.368573293	4.52E-09	0.096801071	0.136484527
YIF1A	brown	-0.279913682	1.17E-05	0.279913682	1.17E-05	0.435211837	2.03E-12	0.475364378	8.04E-15	0.156549864	0.015634324	0.130077774	0.044994891	-0.249661707	9.90E-05	-0.241420896	0.000169487	-0.140108154	0.0307129	-0.562701524	2.82E-21	-0.452552072	2.03E-13	-0.638165761	1.28E-28	0.366647789	5.51E-09	-0.018797411	0.772970866	0.10130711	0.119073492	-0.316555033	6.14E-07	-0.276499733	1.51E-05	-0.038683429	0.552606249
CMIP	brown	-0.452991584	1.92E-13	0.452991584	1.92E-13	-0.077279076	0.234950149	0.58730896	1.84E-23	0.428363175	4.86E-12	0.007949819	0.902898968	-0.284118935	8.50E-06	-0.187536106	0.003687329	-0.060263732	0.35462767	-0.282479835	9.63E-06	-0.481409439	3.28E-15	-0.350026591	2.89E-08	-0.032294039	0.620095843	-0.102117972	0.116132653	-0.0808123	0.214170026	0.027584895	0.672004084	0.213384939	0.000923508	-0.081933272	0.207861058
MINK1	brown	-0.474421216	9.23E-15	0.474421216	9.23E-15	0.074418647	0.252782493	0.708037916	1.61E-37	0.599137324	1.40E-24	0.185429675	0.004097649	-0.125392927	0.053369989	-0.161351891	0.012686034	0.121931547	0.060356736	-0.124941204	0.054241838	-0.393457289	3.10E-10	-0.275731162	1.59E-05	-0.222036663	0.000559441	-0.22468376	0.000478043	-0.25605846	6.43E-05	-0.123910747	0.05627492	0.104804617	0.106792536	-0.168954904	0.009012276
C9orf16	brown	-0.580321983	8.02E-23	0.580321983	8.02E-23	0.170652432	0.008334322	0.75990419	4.85E-46	0.574541437	2.64E-22	0.315469515	6.74E-07	-0.252808072	8.02E-05	-0.378408328	1.61E-09	-0.106123338	0.102429738	-0.513546336	2.04E-17	-0.706093509	3.09E-37	-0.650047887	5.72E-30	0.070031747	0.281913509	-0.184169716	0.004362332	-0.219382219	0.000653786	-0.159779356	0.013592594	0.195120531	0.002499198	-0.035472357	0.586076019
PNP	brown	0.066708687	0.305431452	-0.066708687	0.305431452	0.060691061	0.351219583	-0.176705823	0.006270813	-0.151252908	0.019565457	0.032936363	0.613151871	0.083719323	0.198087482	-0.026231899	0.687224319	-0.109558265	0.091725705	-0.096806184	0.136463719	-0.056934718	0.381883451	0.071108166	0.274564409	0.062750224	0.335087588	0.046648885	0.473827684	0.311322065	9.59E-07	-0.053399789	0.41218197	0.026002017	0.689823101	-0.071624315	0.271087009
NPIPA1	brown	-0.216669612	0.000765213	0.216669612	0.000765213	0.013527927	0.835533944	0.437961567	1.42E-12	0.190863553	0.003114333	-0.043993852	0.499384857	-0.018066245	0.781574552	0.053210706	0.413841566	0.0461833	0.478257066	0.013811871	0.832132427	-0.015680885	0.809823239	-0.015591006	0.810892709	-0.001096443	0.986575392	0.030450284	0.640214233	-0.160226367	0.013329281	-0.168195934	0.009330908	-0.244835953	0.000135912	-0.101784923	0.117333618
TPRA1	brown	-0.288344743	6.14E-06	0.288344743	6.14E-06	0.47936684	4.45E-15	0.781702511	2.67E-50	0.431137879	3.42E-12	0.244197954	0.000141668	-0.074647153	0.251324433	-0.204970986	0.001476241	0.025749703	0.692679669	-0.301833868	2.11E-06	-0.298860753	2.68E-06	-0.468320165	2.24E-14	0.114316579	0.078394299	-0.149305766	0.021212505	-0.079820048	0.219868036	-0.26587599	3.25E-05	-0.5399266	2.07E-19	-0.104290037	0.108534124
MID1IP1	brown	-0.108582119	0.094672521	0.108582119	0.094672521	-0.051656231	0.427633547	0.527140188	2.02E-18	0.297702485	2.94E-06	-0.134628637	0.037942756	-0.132942686	0.040437988	-0.11424487	0.078582891	0.008684892	0.893971074	0.02151846	0.741202671	0.016658984	0.798208018	-0.043938103	0.499929177	-0.106959809	0.099736245	-0.056614269	0.384572779	-0.028889521	0.65745334	-0.06116176	0.347489569	-0.281210719	1.06E-05	-0.164312453	0.011122625
CSNK1D	brown	-0.369290359	4.20E-09	0.369290359	4.20E-09	0.411051966	4.05E-11	0.678351549	1.94E-33	0.287773119	6.42E-06	0.363769993	7.39E-09	0.072473385	0.265432123	-0.146085825	0.024199796	-0.173735155	0.007218204	-0.443068939	7.27E-13	-0.427310936	5.55E-12	-0.328285197	2.19E-07	0.253076966	7.87E-05	-0.076391849	0.240383934	0.04074356	0.531635358	-0.353638944	2.03E-08	-0.267049052	2.99E-05	-0.089616917	0.168191587
COL5A3	brown	-0.360867167	9.91E-09	0.360867167	9.91E-09	-0.038998395	0.549374142	0.643947782	2.86E-29	0.397191078	2.03E-10	-0.133582445	0.039475323	-0.311577851	9.39E-07	-0.185340363	0.004115923	0.031466735	0.629089351	-0.160300809	0.013285869	-0.227900856	0.000393917	-0.320190229	4.48E-07	-0.133907961	0.038992974	-0.140159281	0.030651406	-0.096222268	0.138855669	-0.101387542	0.118779215	-0.064688482	0.320343415	-0.141484652	0.029093565
S100A11	brown	-0.375689038	2.15E-09	0.375689038	2.15E-09	0.204542913	0.001511169	0.647637777	1.09E-29	0.608627534	1.64E-25	0.388124419	5.61E-10	-0.014106871	0.828601769	-0.228777239	0.000373509	-0.009645894	0.882319418	-0.072627854	0.264412092	-0.312884182	8.40E-07	-0.179021619	0.005611127	-0.276660358	1.49E-05	-0.279918222	1.17E-05	-0.22304117	0.00052715	-0.158835695	0.014163496	-0.0193753	0.766190316	-0.1750183	0.006794354
NR1H2	brown	-0.360722449	1.01E-08	0.360722449	1.01E-08	0.340868185	6.92E-08	0.659646972	4.20E-31	0.229714834	0.000352765	0.204410617	0.001522116	-0.073286566	0.260092452	-0.258445672	5.46E-05	-0.141399964	0.029191041	-0.488697957	1.09E-15	-0.405252644	8.03E-11	-0.538350206	2.76E-19	0.359822757	1.10E-08	-0.039735925	0.541842225	0.019380648	0.766127648	-0.203005492	0.001642944	-0.367115171	5.25E-09	-0.047190304	0.468705155
ALG5	brown	0.301887877	2.10E-06	-0.301887877	2.10E-06	-0.089341668	0.169507394	-0.520460998	6.37E-18	-0.551629009	2.37E-20	-0.410865875	4.14E-11	-0.009812461	0.880302376	0.006583636	0.919523675	-0.132594555	0.040970091	0.044652869	0.492974097	0.322688219	3.60E-07	0.204002183	0.001556371	0.256583998	6.21E-05	0.19302458	0.002786735	0.248146712	0.000109395	0.173991903	0.007131554	-0.020621728	0.751626631	0.136274063	0.035634225
HECTD3	brown	-0.500854851	1.62E-16	0.500854851	1.62E-16	0.085557513	0.188381868	0.662300373	2.00E-31	0.525642205	2.62E-18	-0.053061954	0.415149928	-0.447607735	3.97E-13	-0.247259973	0.000115976	0.034308841	0.598430083	-0.239063235	0.000197029	-0.42368145	8.73E-12	-0.472883225	1.16E-14	-0.125395699	0.053364676	-0.170497005	0.008394454	-0.199099901	0.002026295	-0.156031317	0.015985995	0.104351105	0.108326282	-0.127670194	0.049150016
SH3GLB2	brown	-0.356566199	1.52E-08	0.356566199	1.52E-08	0.163813082	0.011373769	0.790383055	3.91E-52	0.650587531	4.95E-30	0.37026345	3.80E-09	0.034879802	0.592353007	-0.185934605	0.003995706	0.184619094	0.004266213	-0.154113197	0.017347589	-0.390816094	4.16E-10	-0.372325696	3.06E-09	-0.097705262	0.132842693	-0.307428528	1.33E-06	-0.298247209	2.81E-06	-0.16188389	0.01239161	-0.194749039	0.002548108	-0.031572081	0.627941067
MFAP4	brown	-0.243607133	0.000147202	0.243607133	0.000147202	0.085313165	0.189651552	0.504724074	8.68E-17	0.3537017	2.02E-08	0.259397902	5.12E-05	0.087531674	0.178351543	0.004921953	0.939790739	0.17344424	0.007317518	-0.014238543	0.827026987	-0.13181322	0.042185815	-0.147299541	0.02303373	-0.105638379	0.104017477	-0.002711046	0.96681449	-0.315923504	6.48E-07	-0.149385788	0.021142523	-0.265295794	3.39E-05	-0.142668926	0.027759346
LSR	brown	-0.436832086	1.65E-12	0.436832086	1.65E-12	-0.01603412	0.805623512	0.793948842	6.50E-53	0.609097871	1.47E-25	0.363347548	7.72E-09	-0.141377012	0.029217507	-0.200925025	0.001838005	-0.007782093	0.904937854	-0.2615648	4.40E-05	-0.437926776	1.43E-12	-0.375894529	2.10E-09	-0.141721239	0.028822724	-0.152060486	0.018915611	-0.140835942	0.029847386	-0.195221365	0.002486071	0.065141953	0.316955675	-0.167943552	0.009439054
SORBS3	brown	-0.623019691	5.51E-27	0.623019691	5.51E-27	0.2423593	0.000159561	0.838030839	4.98E-64	0.621627794	7.72E-27	0.325817246	2.73E-07	-0.127373259	0.04968397	-0.206273537	0.001374456	0.002746614	0.966379369	-0.351592056	2.48E-08	-0.59678235	2.36E-24	-0.472941079	1.15E-14	-0.077151391	0.235726785	-0.239226642	0.000194993	-0.239728981	0.000188856	-0.159797165	0.013582017	0.033196283	0.610351678	-0.162730328	0.011935555
[truncated: 2,069 more rows]
